# Supplementary material for: QTLs Identification for Iron Chlorosis in a Segregating Peach–Almond Progeny Through Double-Digest Sequence-Based Genotyping (SBG)
Source: Front Plant Sci. 2022 May 31;13:872208. doi: 10.3389/fpls.2022.872208 (PMC9194768; doi:10.3389/fpls.2022.872208)
Supplement: Supplementary file 1 [file Table_1.XLS]

## Sheet: Hoja1
Supplementary Table S1. Sequencing depth, mean coverage and unique tags of 'Adafuel' × 'Flordaguard' population using double-digest SBG
Genotype	N° of read pairs	Mean depth per SNP	Unique tags
Adafuel	11209928	1519.7	3636862
Flordaguard	11595872	1660.95	3885901
AF_1	13266352	743.805	4588110
AF_10	10447748	1160.97	3741919
AF_100	14028308	1128.55	4970990
AF_101	7205180	916.305	2361908
AF_102	12137396	1342.37	4387628
AF_104	14560280	827.359	5516312
AF_105	12046824	2114.32	4282844
AF_106	10556672	1225.73	3822271
AF_107	14471680	1773.79	5356210
AF_108	11749884	1404.89	4064147
AF_109	10414808	963.215	3737344
AF_11	11511288	1698.3	4003318
AF_110	14689896	1230.39	5414360
AF_111	10356784	990.754	3514540
AF_112	6640168	838.876	2268448
AF_113	16478992	827.872	6169888
AF_114	12857908	1109.6	4305978
AF_115	12727304	994.093	4458786
AF_116	11707884	1165.3	4177237
AF_117	10223096	1357.73	3565456
AF_119	10507456	1515.12	3813322
AF_12	10017420	1084.54	3415500
AF_123	6890912	1024.86	2271901
AF_124	10152144	1346.1	3568724
AF_125	12693276	1919.08	4505257
AF_126	12202500	1566.7	4419226
AF_127	11005440	1588.02	3632293
AF_128	11911072	1527.52	4411418
AF_129	10311780	904.679	3708243
AF_13	8295504	1122.63	2824681
AF_130	9601028	1506.05	3438310
AF_131	9044144	1201.76	3314956
AF_132	10485104	1289.31	3629468
AF_133	5965748	1633.58	2022498
AF_134	9150788	1587.55	3459319
AF_135	9554924	1723.44	3587634
AF_136	8575016	1280.64	3195234
AF_138	10588420	1033.92	3759340
AF_14	10602440	585.701	3731291
AF_141	6398052	1435.22	2291908
AF_142	5745868	1048.92	2098162
AF_146	6891448	1293.92	2527320
AF_147	6148240	1296.14	2182598
AF_148	5790732	1172.36	2154301
AF_149	4370696	1157.11	1548906
AF_15	6986444	1029.1	2357345
AF_150	4293116	902.67	1609657
AF_154	5858776	1279.74	1908423
AF_16	10267016	2588.49	3555207
AF_17	9328652	2570.18	3359421
AF_18	9943928	713.611	3493368
AF_19	12173908	529.713	4323146
AF_2	11653948	886.985	4144160
AF_21	6892912	1660.95	2472268
AF_22	17066444	1409.23	6001230
AF_23	11171120	772.669	3833090
AF_24	12404768	1974.61	4312778
AF_25	9621316	1934.29	3243942
AF_26	8182492	1747.91	2830399
AF_27	12021708	1894.68	4066433
AF_28	10796896	1011.42	3672349
AF_29	10796728	1158.69	3329405
AF_3	12359540	1519.7	4290340
AF_31	6620620	22.4489	2295899
AF_32	10429908	747.786	3523819
AF_35	10471712	975.212	3930709
AF_36	13651032	745.259	5126001
AF_37	11971700	999.169	4083141
AF_38	11585040	1189.5	4098076
AF_39	14902784	23.1082	4999864
AF_4	11742376	577.722	4094508
AF_41	11553452	1033.12	4302756
AF_43	12449144	768.253	4342805
AF_44	11913584	744.093	4097193
AF_45	14485316	767.833	5067841
AF_46	14321720	744.016	4902779
AF_47	11091600	964.002	4047540
AF_48	13799676	691.514	5055130
AF_49	13770712	634.522	4986033
AF_5	7134936	727.303	2454769
AF_50	12033284	3442.74	3895197
AF_53	15004508	2130.82	5245378
AF_55	15804688	458.65	5600526
AF_56	18572896	519.866	6620490
AF_6	12369708	1396.15	4316765
AF_61	14824908	626.812	5142952
AF_62	13378716	842.82	4454273
AF_63	12978844	696.887	4824779
AF_64	15582216	1972.13	5275269
AF_65	10446452	780.85	3810261
AF_66	12985552	1440.93	4763698
AF_7	9814556	904.234	3297871
AF_70	15257304	2180.59	5550390
AF_72	13292180	2158.59	4652550
AF_75	9954608	2800.84	3707392
AF_76	11475540	1506.77	4258791
AF_77	10501056	160.82	3640670
AF_78	12585048	1338.4	4338793
AF_79	10707076	1181.72	3444250
AF_8	10479196	3409	3548042
AF_80	15790668	2332.7	5738517
AF_81	12106388	1553.76	4287652
AF_82	13606800	1006.91	5118878
AF_83	11620796	921.826	3818536
AF_84	12805476	1258.29	4430590
AF_85	13353804	833.325	4712368
AF_86	15679120	966.339	5830019
AF_87	15018032	836.754	5527767
AF_89	15064904	1403.69	5264269
AF_9	12138280	2531.79	4119536
AF_90	11397212	1092.11	4025692
AF_92	12109128	1121.29	4280017
AF_93	12455588	1238.74	4076311
AF_94	12102408	1046.16	4229523
AF_95	9130928	710.407	3206180
AF_96	12739044	1035.12	4672137
AF_98	14461608	609.656	5049352
AF_99	11398364	1058.35	4093058
Total	1358526312	149286	478822830
Mean	1.13211e+07	1244.05	3.99019e+06
