# Supplementary material for: QTLs Identification for Iron Chlorosis in a Segregating Peach–Almond Progeny Through Double-Digest Sequence-Based Genotyping (SBG)
Source: Front Plant Sci. 2022 May 31;13:872208. doi: 10.3389/fpls.2022.872208 (PMC9194768; doi:10.3389/fpls.2022.872208)
Supplement: Supplementary file 2 [file Table_2.XLS]

## Sheet: Ad-LG1
Supplementary Table 2. Markers mapped in 'Adafuel' and 'Flordaguard' linkage maps.
Locus	Position (cM)
Pp01_60632	0
Pp01_60799	0
Pp01_73267	0
Pp01_200925	0
Pp01_200960	0
Pp01_201481	0
Pp01_201505	0
Pp01_201529	0
Pp01_254118	0
Pp01_289189	0
Pp01_337650	0
Pp01_337651	0
Pp01_361044	0
Pp01_361105	0
Pp01_361460	0
Pp01_367705	0
Pp01_367867	0
Pp01_367874	0
Pp01_367969	0
Pp01_428161	0
Pp01_428162	0
Pp01_428223	0
Pp01_496475	0
Pp01_496979	0
Pp01_497086	0
Pp01_497574	0
Pp01_497618	0
Pp01_559831	0
Pp01_559849	0
Pp01_559963	0
Pp01_560140	0
Pp01_586880	0
Pp01_640399	0
Pp01_640443	0
Pp01_640493	0
Pp01_662114	0
Pp01_662160	0
Pp01_673781	0
Pp01_673879	0
Pp01_673960	0
Pp01_866159	0
Pp01_866189	0
Pp01_921969	0.87
Pp01_1198293	0.87
Pp01_1272828	0.87
Pp01_883833	0.87
Pp01_883970	0.87
Pp01_898564	0.87
Pp01_903807	0.87
Pp01_921348	0.87
Pp01_921375	0.87
Pp01_921408	0.87
Pp01_921417	0.87
Pp01_921420	0.87
Pp01_921426	0.87
Pp01_921453	0.87
Pp01_921939	0.87
Pp01_1006993	0.87
Pp01_1007026	0.87
Pp01_1007054	0.87
Pp01_1007081	0.87
Pp01_1015016	0.87
Pp01_1016426	0.87
Pp01_1016476	0.87
Pp01_1016523	0.87
Pp01_1016530	0.87
Pp01_1034903	0.87
Pp01_1034915	0.87
Pp01_1035062	0.87
Pp01_1035563	0.87
Pp01_1035564	0.87
Pp01_1035611	0.87
Pp01_1040609	0.87
Pp01_1040614	0.87
Pp01_1040779	0.87
Pp01_1142308	0.87
Pp01_1189843	0.87
Pp01_1189882	0.87
Pp01_1208545	0.87
Pp01_1208568	0.87
Pp01_1208648	0.87
Pp01_1208674	0.87
Pp01_1208706	0.87
Pp01_1208712	0.87
Pp01_1258585	0.87
Pp01_1259052	0.87
Pp01_1302639	0.87
Pp01_1331543	0.87
Pp01_1331679	0.87
Pp01_1331720	0.87
Pp01_1333428	0.87
Pp01_1393235	0.87
Pp01_1393252	0.87
Pp01_1393265	0.87
Pp01_1459439	0.87
Pp01_1459456	0.87
Pp01_1459482	0.87
Pp01_1459537	0.87
Pp01_1510293	0.87
Pp01_1510317	0.87
Pp01_1510347	0.87
Pp01_1515949	0.87
Pp01_1515986	0.87
Pp01_1515999	0.87
Pp01_1518452	0.87
Pp01_1518469	0.87
Pp01_1518472	0.87
Pp01_1518656	0.87
Pp01_1568677	0.87
Pp01_1573260	0.87
Pp01_1593416	1.742
Pp01_1593492	1.742
Pp01_1593506	1.742
Pp01_1593542	1.742
Pp01_1593614	1.742
Pp01_1593930	1.742
Pp01_1611631	1.742
Pp01_1611654	1.742
Pp01_1611846	1.742
Pp01_1656101	1.742
Pp01_1656148	1.742
Pp01_1656277	1.742
Pp01_1705366	1.742
Pp01_1705394	1.742
Pp01_1705504	1.742
Pp01_1705558	1.742
Pp01_1705563	1.742
Pp01_1705599	1.742
Pp01_1744403	1.742
Pp01_1744434	1.742
Pp01_1761296	1.742
Pp01_1761603	1.742
Pp01_1777852	1.742
Pp01_1839627	1.742
Pp01_1907318	1.742
Pp01_1907337	1.742
Pp01_1907499	1.742
Pp01_1907511	1.742
Pp01_1949782	2.614
Pp01_1956834	2.614
Pp01_1956980	2.614
Pp01_1967809	2.614
Pp01_2271574	2.614
Pp01_2271663	2.614
Pp01_2271747	2.614
Pp01_2272217	2.614
Pp01_2272324	2.614
Pp01_2290273	2.614
Pp01_2302095	2.614
Pp01_2302194	2.614
Pp01_2318800	2.614
Pp01_2318806	2.614
Pp01_2318833	2.614
Pp01_2318839	2.614
Pp01_2318840	2.614
Pp01_2318870	2.614
Pp01_2318875	2.614
Pp01_2318936	2.614
Pp01_2318938	2.614
Pp01_2318986	2.614
Pp01_2318987	2.614
Pp01_2318995	2.614
Pp01_2319017	2.614
Pp01_2343326	2.614
Pp01_2343382	2.614
Pp01_2446666	2.614
Pp01_2475591	2.614
Pp01_2475742	2.614
Pp01_2475743	2.614
Pp01_2547697	2.614
Pp01_2572166	2.614
Pp01_2572170	2.614
Pp01_2734685	3.485
Pp01_2735475	3.485
Pp01_2735508	3.485
Pp01_2743960	3.485
Pp01_2743985	3.485
Pp01_2826567	3.485
Pp01_2826756	3.485
Pp01_2826781	3.485
Pp01_2826783	3.485
Pp01_2829342	3.485
Pp01_2829368	3.485
Pp01_2829376	3.485
Pp01_2829384	3.485
Pp01_2829396	3.485
Pp01_2844044	3.485
Pp01_2844053	3.485
Pp01_2844072	3.485
Pp01_2844074	3.485
Pp01_2844092	3.485
Pp01_2852851	3.485
Pp01_2861053	3.485
Pp01_2861124	3.485
Pp01_2861416	3.485
Pp01_2918924	3.485
Pp01_2919125	3.485
Pp01_2920005	3.485
Pp01_2920064	3.485
Pp01_3031119	3.485
Pp01_3031300	3.485
Pp01_3203584	3.485
Pp01_3203614	3.485
Pp01_3203626	3.485
Pp01_3203938	3.485
Pp01_3252963	3.485
Pp01_3253327	3.485
Pp01_3256349	3.485
Pp01_3256636	3.485
Pp01_3256695	3.485
Pp01_3256707	3.485
Pp01_3269935	3.485
Pp01_3319910	3.485
Pp01_3319991	3.485
Pp01_3320216	3.485
Pp01_3341479	3.485
Pp01_3341574	3.485
Pp01_3341617	3.485
Pp01_3363606	3.485
Pp01_3363626	3.485
Pp01_3363659	3.485
Pp01_3400901	3.485
Pp01_3400905	3.485
Pp01_3400926	3.485
Pp01_3458095	4.343
Pp01_3404019	4.343
Pp01_3404059	4.343
Pp01_3404356	4.343
Pp01_3431774	4.343
Pp01_3431787	4.343
Pp01_3464642	4.343
Pp01_3464646	4.343
Pp01_3464675	4.343
Pp01_3464884	4.343
Pp01_3464933	4.343
Pp01_3464939	4.343
Pp01_3487024	4.343
Pp01_3487137	4.343
Pp01_3487387	4.343
Pp01_3487414	4.343
Pp01_3515658	4.343
Pp01_3515828	4.343
Pp01_3540775	4.343
Pp01_3557776	4.343
Pp01_3562698	4.343
Pp01_3562772	4.343
Pp01_3565041	4.343
Pp01_3565440	4.343
Pp01_3577338	4.343
Pp01_3656568	4.343
Pp01_3656598	4.343
Pp01_3656685	4.343
Pp01_3694383	4.343
Pp01_3694422	4.343
Pp01_3694472	4.343
Pp01_3694498	4.343
Pp01_3694510	4.343
Pp01_3698263	4.343
Pp01_3698298	4.343
Pp01_3698413	4.343
Pp01_3698446	4.343
Pp01_3698468	4.343
Pp01_3698480	4.343
Pp01_3698487	4.343
Pp01_3698490	4.343
Pp01_3698503	4.343
Pp01_3792847	4.343
Pp01_3792885	4.343
Pp01_3792905	4.343
Pp01_3792924	4.343
Pp01_3805572	4.343
Pp01_3834459	4.343
Pp01_3834469	4.343
Pp01_3834472	4.343
Pp01_3834681	4.343
Pp01_3834682	4.343
Pp01_3847552	4.343
Pp01_3847667	4.343
Pp01_3923873	4.343
Pp01_3990228	4.343
Pp01_3990250	4.343
Pp01_3990301	4.343
Pp01_4006933	4.343
Pp01_4021634	4.343
Pp01_4083398	4.343
Pp01_4083423	4.343
Pp01_4083789	4.343
Pp01_4146767	4.343
Pp01_4146784	4.343
Pp01_4146793	4.343
Pp01_4146842	4.343
Pp01_4147102	4.343
Pp01_4147123	4.343
Pp01_4233098	4.343
Pp01_4233130	4.343
Pp01_4233148	4.343
Pp01_4233164	4.343
Pp01_4233208	4.343
Pp01_4271869	4.343
Pp01_4271909	4.343
Pp01_4271919	4.343
Pp01_4272375	4.343
Pp01_4272415	4.343
Pp01_4284262	4.343
Pp01_4284360	4.343
Pp01_4322607	4.343
Pp01_4323022	4.343
Pp01_4323450	4.343
Pp01_4323575	4.343
Pp01_4323585	4.343
Pp01_4323869	4.343
Pp01_4323880	4.343
Pp01_4455815	4.343
Pp01_4455863	4.343
Pp01_4571238	4.343
Pp01_4571273	4.343
Pp01_4571317	4.343
Pp01_4571449	4.343
Pp01_4579891	4.343
Pp01_4596723	4.343
Pp01_4596749	4.343
Pp01_4745756	5.217
Pp01_4776680	5.217
Pp01_4776689	5.217
Pp01_4981434	6.967
Pp01_6205631	7.842
Pp01_5038167	7.842
Pp01_5038493	7.842
Pp01_5047953	7.842
Pp01_5048186	7.842
Pp01_5087996	7.842
Pp01_5088348	7.842
Pp01_5088530	7.842
Pp01_5258145	7.842
Pp01_5258179	7.842
Pp01_5258324	7.842
Pp01_5267386	7.842
Pp01_5338093	7.842
Pp01_5338358	7.842
Pp01_5338398	7.842
Pp01_5394796	7.842
Pp01_5394797	7.842
Pp01_5395011	7.842
Pp01_5395044	7.842
Pp01_5395077	7.842
Pp01_5424013	7.842
Pp01_5424032	7.842
Pp01_5459068	7.842
Pp01_5477742	7.842
Pp01_5478422	7.842
Pp01_5478453	7.842
Pp01_5478456	7.842
Pp01_5581572	7.842
Pp01_5588028	7.842
Pp01_5589329	7.842
Pp01_5628932	7.842
Pp01_5629458	7.842
Pp01_5629563	7.842
Pp01_5723017	7.842
Pp01_5744796	7.842
Pp01_5744821	7.842
Pp01_5744837	7.842
Pp01_5744854	7.842
Pp01_5744887	7.842
Pp01_5745205	7.842
Pp01_5745223	7.842
Pp01_5745224	7.842
Pp01_5745228	7.842
Pp01_5745231	7.842
Pp01_5745233	7.842
Pp01_5745245	7.842
Pp01_5745266	7.842
Pp01_5748459	7.842
Pp01_5748480	7.842
Pp01_5748482	7.842
Pp01_5748509	7.842
Pp01_5748539	7.842
Pp01_5750979	7.842
Pp01_5835180	7.842
Pp01_5835192	7.842
Pp01_5835197	7.842
Pp01_5835569	7.842
Pp01_5927211	7.842
Pp01_5927417	7.842
Pp01_5987062	7.842
Pp01_5987304	7.842
Pp01_5987323	7.842
Pp01_5987363	7.842
Pp01_6014360	7.842
Pp01_6061507	7.842
Pp01_6061515	7.842
Pp01_6061769	7.842
Pp01_6061777	7.842
Pp01_6155271	7.842
Pp01_6155283	7.842
Pp01_6198839	7.842
Pp01_6199292	7.842
Pp01_6199764	7.842
Pp01_6200086	7.842
Pp01_6200112	7.842
Pp01_6202120	7.842
Pp01_6291195	7.842
Pp01_6319211	7.842
Pp01_6337291	7.842
Pp01_6337309	7.842
Pp01_6337316	7.842
Pp01_6420688	7.842
Pp01_6471308	8.721
Pp01_6471578	8.721
Pp01_6471643	8.721
Pp01_6471644	8.721
Pp01_6486229	8.721
Pp01_6486259	8.721
Pp01_6486293	8.721
Pp01_6505044	8.721
Pp01_6505045	8.721
Pp01_6505112	8.721
Pp01_6509598	8.721
Pp01_6509604	8.721
Pp01_6509638	8.721
Pp01_6509688	8.721
Pp01_6509814	8.721
Pp01_6509843	8.721
Pp01_6509873	8.721
Pp01_6509895	8.721
Pp01_6532585	8.721
Pp01_6532710	8.721
Pp01_6532797	8.721
Pp01_6532942	8.721
Pp01_6532951	8.721
Pp01_6533002	8.721
Pp01_6533033	8.721
Pp01_6666222	8.721
Pp01_6666247	8.721
Pp01_6666650	8.721
Pp01_6677678	8.721
Pp01_6677764	8.721
Pp01_6708393	8.721
Pp01_6708442	8.721
Pp01_6708809	8.721
Pp01_6717287	8.721
Pp01_6717307	8.721
Pp01_6789841	8.721
Pp01_6789958	8.721
Pp01_6789960	8.721
Pp01_6789983	8.721
Pp01_6806945	8.721
Pp01_6871895	8.721
Pp01_6909692	8.721
Pp01_6909699	8.721
Pp01_6909741	8.721
Pp01_6987429	8.721
Pp01_6987446	8.721
Pp01_6987465	8.721
Pp01_6987664	8.721
Pp01_6987668	8.721
Pp01_6987688	8.721
Pp01_6987718	8.721
Pp01_6987721	8.721
Pp01_6987724	8.721
Pp01_6987767	8.721
Pp01_7110109	8.721
Pp01_7110165	8.721
Pp01_7153694	8.721
Pp01_7153781	8.721
Pp01_7153919	8.721
Pp01_7153921	8.721
Pp01_7157265	8.721
Pp01_7157269	8.721
Pp01_7157309	8.721
Pp01_7320242	8.721
Pp01_7320262	8.721
Pp01_7333409	8.721
Pp01_7333419	8.721
Pp01_7333420	8.721
Pp01_7333464	8.721
Pp01_7333588	8.721
Pp01_7362444	8.721
Pp01_7362464	8.721
Pp01_7362466	8.721
Pp01_7362494	8.721
Pp01_7362593	8.721
Pp01_7362635	8.721
Pp01_7362716	8.721
Pp01_7362737	8.721
Pp01_7362743	8.721
Pp01_7362776	8.721
Pp01_7362814	8.721
Pp01_7362824	8.721
Pp01_7363097	8.721
Pp01_7363116	8.721
Pp01_7363125	8.721
Pp01_7363157	8.721
Pp01_7363158	8.721
Pp01_7363159	8.721
Pp01_7363161	8.721
Pp01_7363173	8.721
Pp01_7368876	8.721
Pp01_7368878	8.721
Pp01_7368890	8.721
Pp01_7368902	8.721
Pp01_7368921	8.721
Pp01_7368922	8.721
Pp01_7369060	8.721
Pp01_7369071	8.721
Pp01_7369074	8.721
Pp01_7369182	8.721
Pp01_7369185	8.721
Pp01_7369242	8.721
Pp01_7369280	8.721
Pp01_7523119	8.721
Pp01_7552053	8.721
Pp01_6717339	8.721
Pp01_7585044	10.482
Pp01_7735120	10.482
Pp01_7785328	11.348
Pp01_7785502	11.348
Pp01_7814389	11.348
Pp01_7814397	11.348
Pp01_7814425	11.348
Pp01_7817343	11.348
Pp01_7817346	11.348
Pp01_7817417	11.348
Pp01_7857264	11.348
Pp01_7857297	11.348
Pp01_7857339	11.348
Pp01_7866979	11.348
Pp01_7867062	11.348
Pp01_7893454	11.348
Pp01_7973780	11.348
Pp01_7974051	11.348
Pp01_7994445	11.348
Pp01_7994553	11.348
Pp01_7994570	11.348
Pp01_8160345	12.234
Pp01_8190051	12.234
Pp01_8190099	12.234
Pp01_8213652	12.234
Pp01_8213737	12.234
Pp01_8213738	12.234
Pp01_8213740	12.234
Pp01_8213751	12.234
Pp01_8213775	12.234
Pp01_8280375	12.234
Pp01_8281884	12.234
Pp01_8294115	12.234
Pp01_8294135	12.234
Pp01_8294416	12.234
Pp01_8294427	12.234
Pp01_8299864	12.234
Pp01_8322104	12.234
Pp01_8322360	12.234
Pp01_8336216	12.234
Pp01_8336225	12.234
Pp01_8336233	12.234
Pp01_8336270	12.234
Pp01_8388121	12.234
Pp01_8388140	12.234
Pp01_8388145	12.234
Pp01_8388154	12.234
Pp01_8388205	12.234
Pp01_8388222	12.234
Pp01_8388260	12.234
Pp01_8388262	12.234
Pp01_8388284	12.234
Pp01_8390177	12.234
Pp01_8390190	12.234
Pp01_8390219	12.234
Pp01_8391568	12.234
Pp01_8409926	12.234
Pp01_8409945	12.234
Pp01_8409950	12.234
Pp01_8409959	12.234
Pp01_8410010	12.234
Pp01_8410027	12.234
Pp01_8410065	12.234
Pp01_8410067	12.234
Pp01_8410089	12.234
Pp01_8429771	12.234
Pp01_8432399	12.234
Pp01_8432452	12.234
Pp01_8476010	12.234
Pp01_8476064	12.234
Pp01_8476845	12.234
Pp01_8476875	12.234
Pp01_8484386	12.234
Pp01_8484458	12.234
Pp01_8484461	12.234
Pp01_8492759	12.234
Pp01_8493145	12.234
Pp01_8509136	12.234
Pp01_8552068	12.234
Pp01_8552117	12.234
Pp01_8552900	12.234
Pp01_8552981	12.234
Pp01_8552995	12.234
Pp01_8568781	12.234
Pp01_8568796	12.234
Pp01_8568890	12.234
Pp01_8568916	12.234
Pp01_8568925	12.234
Pp01_8569012	12.234
Pp01_8569189	12.234
Pp01_8572911	12.234
Pp01_8572931	12.234
Pp01_8572984	12.234
Pp01_8573026	12.234
Pp01_8573031	12.234
Pp01_8573035	12.234
Pp01_8573041	12.234
Pp01_8573053	12.234
Pp01_8573080	12.234
Pp01_8578708	12.234
Pp01_8584743	12.234
Pp01_8584784	12.234
Pp01_8584874	12.234
Pp01_8584905	12.234
Pp01_8665249	12.234
Pp01_8665460	12.234
Pp01_8665831	12.234
Pp01_8682154	12.234
Pp01_8682349	12.234
Pp01_8682375	12.234
Pp01_8691669	12.234
Pp01_8691671	12.234
Pp01_8691902	12.234
Pp01_8721632	13.125
Pp01_8748330	14.006
Pp01_8748353	14.006
Pp01_8748367	14.006
Pp01_8748368	14.006
Pp01_8751610	14.006
Pp01_8751628	14.006
Pp01_8774537	14.895
Pp01_8774594	14.895
Pp01_8774854	14.895
Pp01_8793495	14.895
Pp01_8793552	14.895
Pp01_8822433	14.895
Pp01_8822614	14.895
Pp01_8822627	14.895
Pp01_8822630	14.895
Pp01_8838664	14.895
Pp01_8838713	14.895
Pp01_8838714	14.895
Pp01_8842778	14.895
Pp01_8845758	14.895
Pp01_8845832	14.895
Pp01_8845888	14.895
Pp01_8845940	14.895
Pp01_8846097	14.895
Pp01_8884049	14.895
Pp01_8884060	14.895
Pp01_8891039	14.895
Pp01_8989782	14.895
Pp01_8989804	14.895
Pp01_9074265	14.895
Pp01_9085734	14.895
Pp01_9085742	14.895
Pp01_9085833	14.895
Pp01_9085834	14.895
Pp01_9086160	14.895
Pp01_9086172	14.895
Pp01_9086253	14.895
Pp01_9086337	14.895
Pp01_9151223	14.895
Pp01_9151415	14.895
Pp01_9151436	14.895
Pp01_9151541	14.895
Pp01_9157110	14.895
Pp01_9157167	14.895
Pp01_9157253	14.895
Pp01_9225930	14.895
Pp01_9225996	14.895
Pp01_9227771	14.895
Pp01_9227772	14.895
Pp01_9227813	14.895
Pp01_9227826	14.895
Pp01_9227832	14.895
Pp01_9231901	14.895
Pp01_9262953	14.895
Pp01_9263212	14.895
Pp01_9276705	14.895
Pp01_9276979	14.895
Pp01_9294317	14.895
Pp01_9294340	14.895
Pp01_9294552	14.895
Pp01_9294603	14.895
Pp01_9319810	14.895
Pp01_9319826	14.895
Pp01_9327505	14.895
Pp01_9327631	14.895
Pp01_9327697	14.895
Pp01_9349200	14.895
Pp01_9561660	14.895
Pp01_9561706	14.895
Pp01_9579518	14.895
Pp01_9585335	14.895
Pp01_9585363	14.895
Pp01_9591185	14.895
Pp01_9591252	14.895
Pp01_9591401	14.895
Pp01_9591660	14.895
Pp01_9623801	14.895
Pp01_9623838	14.895
Pp01_9623908	14.895
Pp01_9623923	14.895
Pp01_9661159	14.895
Pp01_9661449	14.895
Pp01_9874165	14.895
Pp01_9874505	14.895
Pp01_9874506	14.895
Pp01_9912426	14.895
Pp01_9912434	14.895
Pp01_9912715	14.895
Pp01_9912736	14.895
Pp01_9684118	15.779
Pp01_9684254	15.779
Pp01_9741176	15.779
Pp01_9741199	15.779
Pp01_9768027	15.779
Pp01_9857132	15.779
Pp01_9857481	15.779
Pp01_9857504	15.779
Pp01_9999147	15.779
Pp01_9999155	15.779
Pp01_9999267	15.779
Pp01_9999315	15.779
Pp01_9999330	15.779
Pp01_9999344	15.779
Pp01_10008073	15.779
Pp01_10008094	15.779
Pp01_10008318	15.779
Pp01_10008324	15.779
Pp01_10008337	15.779
Pp01_10008361	15.779
Pp01_10008403	15.779
Pp01_10024618	15.779
Pp01_10024632	15.779
Pp01_10024647	15.779
Pp01_10024695	15.779
Pp01_10024807	15.779
Pp01_10024815	15.779
Pp01_10036798	15.779
Pp01_10037052	15.779
Pp01_10037057	15.779
Pp01_10037141	15.779
Pp01_10057763	15.779
Pp01_10057826	15.779
Pp01_10070088	15.779
Pp01_10078329	15.779
Pp01_10078414	15.779
Pp01_10106211	15.779
Pp01_10106255	15.779
Pp01_10106277	15.779
Pp01_10106309	15.779
Pp01_10106338	15.779
Pp01_10115902	15.779
Pp01_10116086	15.779
Pp01_10116088	15.779
Pp01_10119205	15.779
Pp01_10120292	15.779
Pp01_10120326	15.779
Pp01_10152521	15.779
Pp01_10364506	15.779
Pp01_10364893	15.779
Pp01_10365817	15.779
Pp01_10365831	15.779
Pp01_10375773	15.779
Pp01_10383755	15.779
Pp01_10383791	15.779
Pp01_10388171	15.779
Pp01_10388284	15.779
Pp01_10388329	15.779
Pp01_10388382	15.779
Pp01_10419775	15.779
Pp01_10419783	15.779
Pp01_10419799	15.779
Pp01_10419806	15.779
Pp01_10419875	15.779
Pp01_10419954	15.779
Pp01_10551480	15.779
Pp01_10638559	15.779
Pp01_10638635	15.779
Pp01_10638796	15.779
Pp01_10638821	15.779
Pp01_10644036	15.779
Pp01_10645908	15.779
Pp01_10645911	15.779
Pp01_10645919	15.779
Pp01_10645978	15.779
Pp01_10668475	15.779
Pp01_10668483	15.779
Pp01_10676804	15.779
Pp01_10676901	15.779
Pp01_10676904	15.779
Pp01_10676906	15.779
Pp01_10676924	15.779
Pp01_10676940	15.779
Pp01_10714174	15.779
Pp01_10720685	15.779
Pp01_10723102	15.779
Pp01_10727034	15.779
Pp01_10748463	15.779
Pp01_10753653	16.665
Pp01_10753698	16.665
Pp01_10753717	16.665
Pp01_10776024	16.665
Pp01_10776059	16.665
Pp01_10776213	16.665
Pp01_10776217	16.665
Pp01_10776265	16.665
Pp01_10813395	16.665
Pp01_10813417	16.665
Pp01_10813452	16.665
Pp01_10874048	16.665
Pp01_10874111	16.665
Pp01_10874217	16.665
Pp01_10874223	16.665
Pp01_10874259	16.665
Pp01_10874321	16.665
Pp01_10874322	16.665
Pp01_10874347	16.665
Pp01_10874433	16.665
Pp01_10898855	16.665
Pp01_10898859	16.665
Pp01_10899220	16.665
Pp01_10899291	16.665
Pp01_10997191	16.665
Pp01_10997391	16.665
Pp01_10997449	16.665
Pp01_10997522	16.665
Pp01_10997536	16.665
Pp01_10997568	16.665
Pp01_10997582	16.665
Pp01_10997943	16.665
Pp01_11057305	16.665
Pp01_11061941	16.665
Pp01_11061985	16.665
Pp01_11094661	16.665
Pp01_11094727	16.665
Pp01_11094747	16.665
Pp01_11094999	16.665
Pp01_11096445	16.665
Pp01_11096460	16.665
Pp01_11129669	16.665
Pp01_11129678	16.665
Pp01_11129946	16.665
Pp01_11129997	16.665
Pp01_11130002	16.665
Pp01_11147331	16.665
Pp01_11147355	16.665
Pp01_11147372	16.665
Pp01_11147382	16.665
Pp01_11147390	16.665
Pp01_11147579	16.665
Pp01_11147595	16.665
Pp01_11283876	17.551
Pp01_11295073	17.551
Pp01_11295079	17.551
Pp01_11295349	17.551
Pp01_11295355	17.551
Pp01_11330385	17.551
Pp01_11330396	17.551
Pp01_11330666	17.551
Pp01_11330749	17.551
Pp01_11335249	17.551
Pp01_11335327	17.551
Pp01_11335350	17.551
Pp01_11373214	17.551
Pp01_11430082	17.551
Pp01_11430346	17.551
Pp01_11443041	17.551
Pp01_11443247	17.551
Pp01_11443271	17.551
Pp01_11489387	19.335
Pp01_11496064	19.335
Pp01_11534753	19.335
Pp01_11534899	19.335
Pp01_11539273	19.335
Pp01_11548410	19.335
Pp01_11548524	19.335
Pp01_11548546	19.335
Pp01_11560761	19.335
Pp01_11560776	19.335
Pp01_11565436	19.335
Pp01_11565512	19.335
Pp01_11765826	20.221
Pp01_12047521	20.221
Pp01_11619606	20.221
Pp01_11672111	20.221
Pp01_11672120	20.221
Pp01_11672128	20.221
Pp01_11672171	20.221
Pp01_11672183	20.221
Pp01_11672184	20.221
Pp01_11672185	20.221
Pp01_11740700	20.221
Pp01_11740720	20.221
Pp01_11740726	20.221
Pp01_11740921	20.221
Pp01_11740950	20.221
Pp01_11740995	20.221
Pp01_11746705	20.221
Pp01_11746758	20.221
Pp01_11765557	20.221
Pp01_11765614	20.221
Pp01_11765766	20.221
Pp01_11770137	20.221
Pp01_11770259	20.221
Pp01_11770265	20.221
Pp01_11770287	20.221
Pp01_11783837	20.221
Pp01_11785591	20.221
Pp01_11785608	20.221
Pp01_11785660	20.221
Pp01_11785708	20.221
Pp01_11790749	20.221
Pp01_11790773	20.221
Pp01_11791092	20.221
Pp01_11791097	20.221
Pp01_11791102	20.221
Pp01_11791104	20.221
Pp01_11791105	20.221
Pp01_11791113	20.221
Pp01_11808525	20.221
Pp01_11808627	20.221
Pp01_11920610	20.221
Pp01_11944978	20.221
Pp01_11944991	20.221
Pp01_11983128	20.221
Pp01_11983154	20.221
Pp01_11983272	20.221
Pp01_11983377	20.221
Pp01_12024621	20.221
Pp01_12024627	20.221
Pp01_12024632	20.221
Pp01_12047599	20.221
Pp01_12047639	20.221
Pp01_12047647	20.221
Pp01_12047723	20.221
Pp01_12047735	20.221
Pp01_12047794	20.221
Pp01_12047845	20.221
Pp01_12047885	20.221
Pp01_12047922	20.221
Pp01_12047959	20.221
Pp01_12048017	20.221
Pp01_12048030	20.221
Pp01_12053207	20.221
Pp01_12053210	20.221
Pp01_12053240	20.221
Pp01_12053243	20.221
Pp01_12053247	20.221
Pp01_12053264	20.221
Pp01_12053265	20.221
Pp01_12053311	20.221
Pp01_12053313	20.221
Pp01_12053318	20.221
Pp01_12426978	20.78
Pp01_12604826	21.156
Pp01_12071924	21.329
Pp01_12071973	21.329
Pp01_12096198	21.329
Pp01_12116709	21.329
Pp01_12198231	21.329
Pp01_12198236	21.329
Pp01_12198243	21.329
Pp01_12198276	21.329
Pp01_12269576	21.329
Pp01_12270565	21.329
Pp01_12305682	21.329
Pp01_12305690	21.329
Pp01_12306165	21.329
Pp01_12306223	21.329
Pp01_12306251	21.329
Pp01_12344053	21.329
Pp01_12352984	21.329
Pp01_12352994	21.329
Pp01_12353004	21.329
Pp01_12357236	21.329
Pp01_12364514	21.329
Pp01_12364528	21.329
Pp01_12364627	21.329
Pp01_12364732	21.329
Pp01_12364953	21.329
Pp01_12384995	21.329
Pp01_12385000	21.329
Pp01_12385051	21.329
Pp01_12422397	21.329
Pp01_12422411	21.329
Pp01_12422510	21.329
Pp01_12559295	21.329
Pp01_12605210	21.329
Pp01_12614618	21.329
Pp01_12614661	21.329
Pp01_12635155	21.329
Pp01_12704863	21.329
Pp01_12705167	21.329
Pp01_12707657	21.329
Pp01_12707658	21.329
Pp01_12707659	21.329
Pp01_12707660	21.329
Pp01_12707661	21.329
Pp01_12707662	21.329
Pp01_12707664	21.329
Pp01_12804558	21.329
Pp01_12804778	21.329
Pp01_12808889	21.329
Pp01_12809147	21.329
Pp01_12847798	21.329
Pp01_12928279	21.329
Pp01_12928293	21.329
Pp01_13089146	21.329
Pp01_13089233	21.329
Pp01_13133862	21.329
Pp01_13133951	21.329
Pp01_13133963	21.329
Pp01_13133969	21.329
Pp01_13453396	21.329
Pp01_13453401	21.329
Pp01_13453411	21.329
Pp01_13453498	21.329
Pp01_13496295	21.329
Pp01_13496305	21.329
Pp01_13714498	21.329
Pp01_13714504	21.329
Pp01_13714536	21.329
Pp01_13725829	21.329
Pp01_13725844	21.329
Pp01_13726067	21.329
Pp01_13726070	21.329
Pp01_13726072	21.329
Pp01_13726087	21.329
Pp01_13726514	21.329
Pp01_13833480	21.329
Pp01_13833518	21.329
Pp01_14258829	21.329
Pp01_14258863	21.329
Pp01_12096165	21.329
Pp01_12357303	21.329
Pp01_12357325	21.329
Pp01_12425528	21.329
Pp01_12426897	21.329
Pp01_12604004	21.329
Pp01_12604063	21.329
Pp01_12605558	21.329
Pp01_12442299	21.43
Pp01_12442303	21.43
Pp01_12442377	21.43
Pp01_12442436	21.43
Pp01_14336745	22.279
Pp01_14337402	22.279
Pp01_14337486	22.279
Pp01_14402491	22.279
Pp01_14402533	22.279
Pp01_14437836	22.279
Pp01_14501576	22.279
Pp01_14501626	22.279
Pp01_14501647	22.279
Pp01_14501755	22.279
Pp01_14598441	24.061
Pp01_14599020	24.061
Pp01_14655137	24.061
Pp01_14655142	24.061
Pp01_14655148	24.061
Pp01_14655150	24.061
Pp01_14655177	24.061
Pp01_14655212	24.061
Pp01_14655479	24.061
Pp01_14655539	24.061
Pp01_14715203	24.061
Pp01_14715651	24.061
Pp01_14715702	24.061
Pp01_14723845	24.061
Pp01_14723853	24.061
Pp01_14723855	24.061
Pp01_14724037	24.061
Pp01_14798311	24.061
Pp01_14798421	24.061
Pp01_14798644	24.061
Pp01_14828357	24.061
Pp01_14828524	24.061
Pp01_14828531	24.061
Pp01_15057636	24.061
Pp01_14797458	24.532
Pp01_14797489	24.532
Pp01_14797508	24.532
Pp01_14797542	24.532
Pp01_15113063	25.024
Pp01_15212569	25.024
Pp01_15212582	25.024
Pp01_15212808	25.024
Pp01_15212815	25.024
Pp01_15220047	25.024
Pp01_15255629	25.024
Pp01_15255733	25.024
Pp01_15309517	25.024
Pp01_15476596	25.024
Pp01_15476617	25.024
Pp01_15531894	25.024
Pp01_15531980	25.024
Pp01_15600624	25.024
Pp01_15600916	25.024
Pp01_15668848	25.024
Pp01_15690575	25.024
Pp01_15690608	25.024
Pp01_15696788	25.024
Pp01_15746127	25.024
Pp01_15746143	25.024
Pp01_15746176	25.024
Pp01_15811386	25.906
Pp01_15811418	25.906
Pp01_15811448	25.906
Pp01_15811482	25.906
Pp01_15811484	25.906
Pp01_15811491	25.906
Pp01_15812102	25.906
Pp01_15812168	25.906
Pp01_15828621	25.906
Pp01_16051502	25.906
Pp01_16060793	25.906
Pp01_16060822	25.906
Pp01_16060872	25.906
Pp01_16178962	25.906
Pp01_16178968	25.906
Pp01_16179039	25.906
Pp01_16984154	25.906
Pp01_16986258	25.906
Pp01_16986441	25.906
Pp01_16986478	25.906
Pp01_16986479	25.906
Pp01_16986618	25.906
Pp01_17035717	25.906
Pp01_17141546	25.906
Pp01_17141554	25.906
Pp01_17141665	25.906
Pp01_17141666	25.906
Pp01_17141698	25.906
Pp01_17141727	25.906
Pp01_17141744	25.906
Pp01_17390788	25.906
Pp01_17554770	25.906
Pp01_17554789	25.906
Pp01_17557748	25.906
Pp01_17557749	25.906
Pp01_17557812	25.906
Pp01_17585092	25.906
Pp01_17585192	25.906
Pp01_17585210	25.906
Pp01_17590523	25.906
Pp01_17590524	25.906
Pp01_17590543	25.906
Pp01_17776810	25.906
Pp01_17776813	25.906
Pp01_18449312	25.906
Pp01_18449513	25.906
Pp01_18449514	25.906
Pp01_18449539	25.906
Pp01_18516182	25.906
Pp01_18516195	25.906
Pp01_18516199	25.906
Pp01_18521476	25.906
Pp01_18521535	25.906
Pp01_18521859	25.906
Pp01_18523213	25.906
Pp01_18523218	25.906
Pp01_18688277	25.906
Pp01_18688286	25.906
Pp01_18688290	25.906
Pp01_18688319	25.906
Pp01_18688348	25.906
Pp01_18688391	25.906
Pp01_17554777	25.906
Pp01_18753944	26.803
Pp01_18753986	26.803
Pp01_18965427	26.803
Pp01_19271744	26.803
Pp01_19419187	27.654
Pp01_19419245	27.654
Pp01_19486027	27.654
Pp01_19486170	27.654
Pp01_19487802	27.654
Pp01_19582331	27.654
Pp01_19582362	27.654
Pp01_19582371	27.654
Pp01_19582775	27.654
Pp01_20078597	30.38
Pp01_20078650	30.38
Pp01_20078727	30.38
Pp01_20511925	30.38
Pp01_21042775	30.38
Pp01_21042796	30.38
Pp01_21043927	30.38
Pp01_21043983	30.38
Pp01_21043989	30.38
Pp01_21043997	30.38
Pp01_21044003	30.38
Pp01_21091633	30.38
Pp01_21126869	30.38
Pp01_21126882	30.38
Pp01_21126989	30.38
Pp01_21127021	30.38
Pp01_21127024	30.38
Pp01_21127025	30.38
Pp01_22302220	30.38
Pp01_22302324	30.38
Pp01_22368259	30.38
Pp01_22368561	30.38
Pp01_22368567	30.38
Pp01_22368582	30.38
Pp01_22368629	30.38
Pp01_22368663	30.38
Pp01_22371162	30.38
Pp01_22442008	30.38
Pp01_22442071	30.38
Pp01_22442073	30.38
Pp01_22442075	30.38
Pp01_22475770	30.38
Pp01_22475778	30.38
Pp01_22475921	30.38
Pp01_22493059	30.38
Pp01_22493121	30.38
Pp01_22493591	30.38
Pp01_22493643	30.38
Pp01_22493695	30.38
Pp01_22493711	30.38
Pp01_22493720	30.38
Pp01_22493771	30.38
Pp01_22503636	30.38
Pp01_22503695	30.38
Pp01_22503715	30.38
Pp01_22503868	30.38
Pp01_22536736	30.38
Pp01_22536743	30.38
Pp01_22536745	30.38
Pp01_22536748	30.38
Pp01_22536749	30.38
Pp01_22536751	30.38
Pp01_22536753	30.38
Pp01_22536754	30.38
Pp01_22536755	30.38
Pp01_22536756	30.38
Pp01_22536759	30.38
Pp01_22536761	30.38
Pp01_22536762	30.38
Pp01_22536763	30.38
Pp01_22536764	30.38
Pp01_22536765	30.38
Pp01_22536771	30.38
Pp01_22536773	30.38
Pp01_22536780	30.38
Pp01_22536839	30.38
Pp01_22536858	30.38
Pp01_22536862	30.38
Pp01_22536885	30.38
Pp01_22536923	30.38
Pp01_22684863	30.38
Pp01_22742222	30.38
Pp01_22750396	30.38
Pp01_22750434	30.38
Pp01_22750442	30.38
Pp01_22750458	30.38
Pp01_22750576	30.38
Pp01_22762927	30.38
Pp01_22762928	30.38
Pp01_22795506	30.38
Pp01_22795638	30.38
Pp01_22909649	30.38
Pp01_22909656	30.38
Pp01_22909894	30.38
Pp01_22909943	30.38
Pp01_22914180	30.38
Pp01_22914227	30.38
Pp01_22914267	30.38
Pp01_22916179	30.38
Pp01_22970087	30.38
Pp01_22970096	30.38
Pp01_22970111	30.38
Pp01_22970118	30.38
Pp01_22973802	30.38
Pp01_22973804	30.38
Pp01_22973817	30.38
Pp01_22973837	30.38
Pp01_22973866	30.38
Pp01_22973971	30.38
Pp01_22974295	30.38
Pp01_22974319	30.38
Pp01_22471374	31.035
Pp01_22990271	31.345
Pp01_22990361	31.345
Pp01_22990389	31.345
Pp01_23004804	31.345
Pp01_23004849	31.345
Pp01_23004869	31.345
Pp01_23004907	31.345
Pp01_23005074	31.345
Pp01_23025937	31.345
Pp01_23026010	31.345
Pp01_23026086	31.345
Pp01_24211217	32.043
Pp01_23682278	32.182
Pp01_23333280	32.363
Pp01_23382338	32.363
Pp01_23382347	32.363
Pp01_23382348	32.363
Pp01_23382352	32.363
Pp01_23382446	32.363
Pp01_23382447	32.363
Pp01_23385091	32.363
Pp01_23385305	32.363
Pp01_23439382	32.363
Pp01_23439738	32.363
Pp01_23537388	32.363
Pp01_23537654	32.363
Pp01_23537753	32.363
Pp01_23537786	32.363
Pp01_23560139	32.363
Pp01_23569115	32.363
Pp01_23599848	32.363
Pp01_23601728	32.363
Pp01_23602295	32.363
Pp01_23633331	32.363
Pp01_23659356	32.363
Pp01_23682260	32.363
Pp01_23682274	32.363
Pp01_23682296	32.363
Pp01_23682340	32.363
Pp01_23682598	32.363
Pp01_23741314	32.363
Pp01_23741537	32.363
Pp01_23778292	32.363
Pp01_23778329	32.363
Pp01_23783597	32.363
Pp01_23783690	32.363
Pp01_23791520	32.363
Pp01_23798844	32.363
Pp01_23798981	32.363
Pp01_23812220	32.363
Pp01_23848769	32.363
Pp01_23862001	32.363
Pp01_23862113	32.363
Pp01_23862538	32.363
Pp01_23862812	32.363
Pp01_23908513	32.363
Pp01_23908819	32.363
Pp01_23908859	32.363
Pp01_23909164	32.363
Pp01_23909219	32.363
Pp01_23926239	32.363
Pp01_23938186	32.363
Pp01_23938253	32.363
Pp01_24014298	32.363
Pp01_24014299	32.363
Pp01_24014339	32.363
Pp01_24014354	32.363
Pp01_24018671	32.363
Pp01_24018684	32.363
Pp01_24018689	32.363
Pp01_24018893	32.363
Pp01_24018896	32.363
Pp01_24018905	32.363
Pp01_24018919	32.363
Pp01_24018938	32.363
Pp01_24044636	32.363
Pp01_24052031	32.363
Pp01_24052277	32.363
Pp01_24184140	32.363
Pp01_24228331	32.363
Pp01_24255214	32.363
Pp01_24255586	32.363
Pp01_24479162	32.363
Pp01_23377226	32.363
Pp01_23385125	32.363
Pp01_23537406	32.363
Pp01_23569066	32.363
Pp01_24692906	34.12
Pp01_24692920	34.12
Pp01_24692950	34.12
Pp01_24693179	34.12
Pp01_24693192	34.12
Pp01_24693196	34.12
Pp01_24693215	34.12
Pp01_24693243	34.12
Pp01_24693590	34.12
Pp01_24693772	34.12
Pp01_24693870	34.12
Pp01_24709202	34.12
Pp01_24709214	34.12
Pp01_24709255	34.12
Pp01_24719269	34.12
Pp01_24719482	34.12
Pp01_24719494	34.12
Pp01_24719652	34.12
Pp01_24736510	34.12
Pp01_24744180	34.12
Pp01_24744469	34.12
Pp01_24783352	34.12
Pp01_24783409	34.12
Pp01_24783471	34.12
Pp01_24795504	34.12
Pp01_24800649	34.12
Pp01_24804061	34.12
Pp01_24809171	34.12
Pp01_24809177	34.12
Pp01_24829688	34.12
Pp01_24829690	34.12
Pp01_24881518	34.12
Pp01_24895815	34.12
Pp01_24895879	34.12
Pp01_24947739	34.12
Pp01_24947795	34.12
Pp01_24951076	34.12
Pp01_24951363	34.12
Pp01_24951452	34.12
Pp01_25056902	34.12
Pp01_25057064	34.12
Pp01_25057065	34.12
Pp01_25057117	34.12
Pp01_25058838	34.12
Pp01_25301998	34.12
Pp01_25301999	34.12
Pp01_25302245	34.12
Pp01_25318772	34.12
Pp01_25318856	34.12
Pp01_25319663	34.12
Pp01_25328377	34.12
Pp01_25375491	35.035
Pp01_25375536	35.035
Pp01_25375550	35.035
Pp01_25375581	35.035
Pp01_25375607	35.035
Pp01_25382134	35.035
Pp01_25404804	35.035
Pp01_25405241	35.035
Pp01_25407348	35.035
Pp01_25407395	35.035
Pp01_25407427	35.035
Pp01_25407774	35.035
Pp01_25407803	35.035
Pp01_25407828	35.035
Pp01_25411553	35.035
Pp01_25411619	35.035
Pp01_25411684	35.035
Pp01_25411709	35.035
Pp01_25411710	35.035
Pp01_25427430	35.035
Pp01_25427567	35.035
Pp01_25515240	35.035
Pp01_25548385	35.035
Pp01_25576214	35.035
Pp01_25576243	35.035
Pp01_25590944	35.035
Pp01_25592431	35.035
Pp01_25597909	35.035
Pp01_25597952	35.035
Pp01_25667937	35.035
Pp01_25668135	35.035
Pp01_25668138	35.035
Pp01_25672134	35.035
Pp01_25672171	35.035
Pp01_25672194	35.035
Pp01_25672225	35.035
Pp01_25672237	35.035
Pp01_25672271	35.035
Pp01_25716851	35.035
Pp01_25716873	35.035
Pp01_25716913	35.035
Pp01_25716921	35.035
Pp01_25716940	35.035
Pp01_25717019	35.035
Pp01_25717058	35.035
Pp01_25717068	35.035
Pp01_25717105	35.035
Pp01_25730386	35.035
Pp01_25730391	35.035
Pp01_25730404	35.035
Pp01_25742313	35.035
Pp01_25774521	35.035
Pp01_25774869	35.035
Pp01_25774918	35.035
Pp01_25774964	35.035
Pp01_25788860	35.035
Pp01_25788884	35.035
Pp01_25788885	35.035
Pp01_25821136	35.035
Pp01_25821183	35.035
Pp01_25901482	35.035
Pp01_25901547	35.035
Pp01_25901560	35.035
Pp01_25901569	35.035
Pp01_25936807	35.035
Pp01_25936813	35.035
Pp01_25938502	35.035
Pp01_25938522	35.035
Pp01_25938577	35.035
Pp01_25982721	35.035
Pp01_25991611	35.035
Pp01_26039926	35.035
Pp01_26039986	35.035
Pp01_26074178	35.035
Pp01_26096421	35.035
Pp01_26096424	35.035
Pp01_26096479	35.035
Pp01_26096495	35.035
Pp01_26111204	35.035
Pp01_26111247	35.035
Pp01_26111262	35.035
Pp01_26157132	35.035
Pp01_26157136	35.035
Pp01_26163466	35.035
Pp01_26163621	35.035
Pp01_26163624	35.035
Pp01_26163631	35.035
Pp01_26167389	35.035
Pp01_26167417	35.035
Pp01_26167716	35.035
Pp01_26167804	35.035
Pp01_26167830	35.035
Pp01_26168212	35.035
Pp01_26443928	35.717
Pp01_26274880	36.001
Pp01_26281116	36.001
Pp01_26281145	36.001
Pp01_26283694	36.001
Pp01_26288748	36.001
Pp01_26316413	36.001
Pp01_26316499	36.001
Pp01_26316616	36.001
Pp01_26316626	36.001
Pp01_26316647	36.001
Pp01_26445693	36.001
Pp01_26445773	36.001
Pp01_26449859	36.001
Pp01_26450027	36.001
Pp01_26450103	36.001
Pp01_26450107	36.001
Pp01_26469201	36.001
Pp01_26469225	36.001
Pp01_26488519	36.001
Pp01_26489182	36.001
Pp01_26489186	36.001
Pp01_26489196	36.001
Pp01_26489259	36.001
Pp01_26489658	36.001
Pp01_26489699	36.001
Pp01_26489762	36.001
Pp01_26489776	36.001
Pp01_26569673	36.001
Pp01_26569701	36.001
Pp01_26655307	36.922
Pp01_26763212	37.821
Pp01_26837769	37.821
Pp01_26900692	38.74
Pp01_26917634	38.74
Pp01_26917645	38.74
Pp01_26917668	38.74
Pp01_26917746	38.74
Pp01_27054548	39.005
Pp01_26984299	39.699
Pp01_26984643	39.699
Pp01_27003634	39.699
Pp01_27004685	39.699
Pp01_27004689	39.699
Pp01_27056842	39.699
Pp01_27056879	39.699
Pp01_27057182	39.699
Pp01_27057197	39.699
Pp01_27057198	39.699
Pp01_27057225	39.699
Pp01_27057242	39.699
Pp01_27057394	39.699
Pp01_27062011	39.699
Pp01_27062088	39.699
Pp01_27062095	39.699
Pp01_27077040	39.699
Pp01_27478966	40.572
Pp01_27478979	40.572
Pp01_27178671	40.71
Pp01_27201801	40.71
Pp01_27201844	40.71
Pp01_27202797	40.71
Pp01_27203058	40.71
Pp01_27203789	40.71
Pp01_27203836	40.71
Pp01_27203851	40.71
Pp01_27203864	40.71
Pp01_27203873	40.71
Pp01_27204203	40.71
Pp01_27204254	40.71
Pp01_27221722	40.71
Pp01_27271708	40.71
Pp01_27271752	40.71
Pp01_27271946	40.71
Pp01_27377504	40.71
Pp01_27976094	41.314
Pp01_28025595	41.627
Pp01_27441696	41.627
Pp01_27441862	41.627
Pp01_27441869	41.627
Pp01_27476808	41.627
Pp01_27476813	41.627
Pp01_27478722	41.627
Pp01_27586261	41.627
Pp01_27610187	41.627
Pp01_27610287	41.627
Pp01_27610335	41.627
Pp01_27613515	41.627
Pp01_27613546	41.627
Pp01_27613854	41.627
Pp01_27719420	41.627
Pp01_27719423	41.627
Pp01_27719425	41.627
Pp01_27719491	41.627
Pp01_27719552	41.627
Pp01_27719554	41.627
Pp01_27788191	41.627
Pp01_27797605	41.627
Pp01_27797708	41.627
Pp01_27797746	41.627
Pp01_27822998	41.627
Pp01_27974032	41.627
Pp01_27974145	41.627
Pp01_27975466	41.627
Pp01_27980652	41.627
Pp01_28025601	41.627
Pp01_28062876	41.627
Pp01_28062901	41.627
Pp01_28145196	41.627
Pp01_28145452	41.627
Pp01_28188405	41.627
Pp01_28207910	41.627
Pp01_28207911	41.627
Pp01_28208048	41.627
Pp01_28208125	41.627
Pp01_28208151	41.627
Pp01_28208212	41.627
Pp01_28208234	41.627
Pp01_28212280	41.627
Pp01_28224623	41.627
Pp01_28224626	41.627
Pp01_28249714	41.627
Pp01_28264857	41.627
Pp01_28264860	41.627
Pp01_28282326	41.627
Pp01_28282349	41.627
Pp01_28282360	41.627
Pp01_28282792	41.627
Pp01_28282872	41.627
Pp01_28282879	41.627
Pp01_28282892	41.627
Pp01_28282902	41.627
Pp01_28282949	41.627
Pp01_28284207	41.627
Pp01_28288608	41.627
Pp01_28288624	41.627
Pp01_28288648	41.627
Pp01_28288671	41.627
Pp01_28288672	41.627
Pp01_28288701	41.627
Pp01_28288714	41.627
Pp01_28288718	41.627
Pp01_28288761	41.627
Pp01_28288775	41.627
Pp01_30004934	41.627
Pp01_30004978	41.627
Pp01_28402551	42.436
Pp01_28414987	42.436
Pp01_28414988	42.436
Pp01_28415018	42.436
Pp01_28415031	42.436
Pp01_28415310	42.436
Pp01_28415442	42.436
Pp01_28415453	42.436
Pp01_28415478	42.436
Pp01_28415603	42.436
Pp01_28415651	42.436
Pp01_28415672	42.436
Pp01_28434253	42.436
Pp01_28434287	42.436
Pp01_28434377	42.436
Pp01_28434425	42.436
Pp01_28434428	42.436
Pp01_28470853	42.436
Pp01_28470866	42.436
Pp01_28497900	42.436
Pp01_28523044	42.436
Pp01_28523045	42.436
Pp01_28525393	42.436
Pp01_28526905	42.436
Pp01_28539199	42.436
Pp01_28539225	42.436
Pp01_28539557	42.436
Pp01_28547551	42.436
Pp01_28547614	42.436
Pp01_28551750	42.436
Pp01_28557492	42.436
Pp01_28557536	42.436
Pp01_28559011	42.436
Pp01_28559079	42.436
Pp01_28570096	42.436
Pp01_28570114	42.436
Pp01_28570374	42.436
Pp01_28570410	42.436
Pp01_28602484	42.436
Pp01_28602524	42.436
Pp01_28602578	42.436
Pp01_28602888	42.436
Pp01_28602927	42.436
Pp01_28603458	42.436
Pp01_28603470	42.436
Pp01_28603488	42.436
Pp01_28603512	42.436
Pp01_28603527	42.436
Pp01_28613898	42.436
Pp01_28613958	42.436
Pp01_28619921	42.436
Pp01_28620139	42.436
Pp01_28620142	42.436
Pp01_28620192	42.436
Pp01_28620217	42.436
Pp01_28680103	42.436
Pp01_28700730	42.436
Pp01_28701106	42.436
Pp01_28701114	42.436
Pp01_28701863	42.436
Pp01_28701865	42.436
Pp01_28777863	42.436
Pp01_28778290	42.436
Pp01_28778321	42.436
Pp01_28778345	42.436
Pp01_28779033	42.436
Pp01_28779156	42.436
Pp01_28779221	42.436
Pp01_28779223	42.436
Pp01_28794934	42.436
Pp01_28794949	42.436
Pp01_28795197	42.436
Pp01_28795206	42.436
Pp01_28795215	42.436
Pp01_28795264	42.436
Pp01_28815460	42.436
Pp01_28815481	42.436
Pp01_28815507	42.436
Pp01_28815586	42.436
Pp01_28835147	42.436
Pp01_28947211	42.436
Pp01_28947234	42.436
Pp01_28947245	42.436
Pp01_28947377	42.436
Pp01_29009298	42.436
Pp01_29009353	42.436
Pp01_29079868	42.436
Pp01_29134834	42.436
Pp01_29134836	42.436
Pp01_29135158	42.436
Pp01_29141053	42.436
Pp01_29141135	42.436
Pp01_29141136	42.436
Pp01_29141313	42.436
Pp01_29144252	42.436
Pp01_29144264	42.436
Pp01_29144281	42.436
Pp01_29144282	42.436
Pp01_29144300	42.436
Pp01_29144321	42.436
Pp01_29174176	42.436
Pp01_29174217	42.436
Pp01_29174223	42.436
Pp01_29174322	42.436
Pp01_29174326	42.436
Pp01_29174456	42.436
Pp01_29174533	42.436
Pp01_29174672	42.436
Pp01_29189474	42.436
Pp01_29189513	42.436
Pp01_29189838	42.436
Pp01_29189839	42.436
Pp01_29235349	42.436
Pp01_29235381	42.436
Pp01_29276474	42.436
Pp01_29320727	42.436
Pp01_29320742	42.436
Pp01_29320799	42.436
Pp01_29321059	42.436
Pp01_29321060	42.436
Pp01_29326502	42.436
Pp01_29326527	42.436
Pp01_29339058	42.436
Pp01_29339099	42.436
Pp01_29339206	42.436
Pp01_29339217	42.436
Pp01_29339336	42.436
Pp01_29339396	42.436
Pp01_29350712	42.436
Pp01_29350750	42.436
Pp01_29350786	42.436
Pp01_29350792	42.436
Pp01_29350889	42.436
Pp01_29351143	42.436
Pp01_29351222	42.436
Pp01_29394517	42.436
Pp01_29394577	42.436
Pp01_29402884	42.436
Pp01_29403330	42.436
Pp01_29433530	42.436
Pp01_29433576	42.436
Pp01_29515488	42.436
Pp01_29515531	42.436
Pp01_29637524	42.436
Pp01_29637536	42.436
Pp01_29637539	42.436
Pp01_29637558	42.436
Pp01_29637572	42.436
Pp01_29654735	42.436
Pp01_29676341	42.436
Pp01_29695767	42.436
Pp01_29695768	42.436
Pp01_29709575	42.436
Pp01_29713965	42.436
Pp01_29714171	42.436
Pp01_29733909	42.436
Pp01_29734017	42.436
Pp01_29734030	42.436
Pp01_29794535	42.436
Pp01_29794545	42.436
Pp01_29794588	42.436
Pp01_29794834	42.436
Pp01_29807823	42.436
Pp01_29808029	42.436
Pp01_29817513	42.436
Pp01_29817533	42.436
Pp01_29817873	42.436
Pp01_29830249	42.436
Pp01_29830274	42.436
Pp01_29830577	42.436
Pp01_29872945	42.436
Pp01_29872986	42.436
Pp01_29873049	42.436
Pp01_29873094	42.436
Pp01_29894494	42.436
Pp01_29898062	42.436
Pp01_29898097	42.436
Pp01_29928424	42.436
Pp01_29928450	42.436
Pp01_29928598	42.436
Pp01_29951193	42.436
Pp01_29951207	42.436
Pp01_29951232	42.436
Pp01_29951262	42.436
Pp01_29951275	42.436
Pp01_29951873	42.436
Pp01_30008596	42.436
Pp01_30019179	42.436
Pp01_30019188	42.436
Pp01_30019203	42.436
Pp01_30021167	42.436
Pp01_30021428	42.436
Pp01_30021492	42.436
Pp01_29141350	42.436
Pp01_29321009	42.436
Pp01_29324694	42.436
Pp01_29339052	42.436
Pp01_29339419	42.436
Pp01_29350778	42.436
Pp01_29873096	42.436
Pp01_29873115	42.436
Pp01_29873129	42.436
Pp01_30114414	43.327
Pp01_30114482	43.327
Pp01_30354587	43.327
Pp01_30559205	43.327
Pp01_30028014	43.327
Pp01_30028032	43.327
Pp01_30043584	43.327
Pp01_30043859	43.327
Pp01_30043882	43.327
Pp01_30043894	43.327
Pp01_30043904	43.327
Pp01_30043943	43.327
Pp01_30053256	43.327
Pp01_30053288	43.327
Pp01_30053360	43.327
Pp01_30053370	43.327
Pp01_30053505	43.327
Pp01_30059590	43.327
Pp01_30059611	43.327
Pp01_30059667	43.327
Pp01_30059685	43.327
Pp01_30114564	43.327
Pp01_30206114	43.327
Pp01_30206120	43.327
Pp01_30206257	43.327
Pp01_30206260	43.327
Pp01_30206266	43.327
Pp01_30207028	43.327
Pp01_30207070	43.327
Pp01_30207085	43.327
Pp01_30222945	43.327
Pp01_30286655	43.327
Pp01_30341408	43.327
Pp01_30341438	43.327
Pp01_30341484	43.327
Pp01_30341499	43.327
Pp01_30354620	43.327
Pp01_30364030	43.327
Pp01_30364097	43.327
Pp01_30373988	43.327
Pp01_30374246	43.327
Pp01_30385827	43.327
Pp01_30417151	43.327
Pp01_30417157	43.327
Pp01_30417541	43.327
Pp01_30425169	43.327
Pp01_30505442	43.327
Pp01_30514720	43.327
Pp01_30514780	43.327
Pp01_30514797	43.327
Pp01_30514803	43.327
Pp01_30516275	43.327
Pp01_30543917	43.327
Pp01_30556251	43.327
Pp01_30556637	43.327
Pp01_30556668	43.327
Pp01_30559066	43.327
Pp01_30559203	43.327
Pp01_30559227	43.327
Pp01_30559271	43.327
Pp01_30588621	43.327
Pp01_30589980	43.327
Pp01_30599549	43.327
Pp01_30206165	44.09
Pp01_30631760	44.23
Pp01_30700013	44.23
Pp01_30673772	44.23
Pp01_30675954	44.23
Pp01_30699920	44.23
Pp01_30705609	44.23
Pp01_30764066	44.23
Pp01_30764095	44.23
Pp01_30764115	44.23
Pp01_30786165	44.23
Pp01_30909328	45.457
Pp01_30909760	45.457
Pp01_30840337	46.048
Pp01_30840371	46.048
Pp01_30840403	46.048
Pp01_30840539	46.048
Pp01_30840580	46.048
Pp01_30851076	46.048
Pp01_30851368	46.048
Pp01_30884585	46.048
Pp01_30884891	46.048
Pp01_30885153	46.048
Pp01_30885288	46.048
Pp01_30904379	46.048
Pp01_30904544	46.048
Pp01_30904567	46.048
Pp01_30943920	46.048
Pp01_30943954	46.048
Pp01_30943963	46.048
Pp01_30944327	46.048
Pp01_30968587	46.048
Pp01_30968597	46.048
Pp01_30988552	46.048
Pp01_31301773	47.744
Pp01_31326652	47.744
Pp01_31650025	48.522
Pp01_31650100	48.522
Pp01_31650112	48.522
Pp01_31715722	49.189
Pp01_31715759	49.189
Pp01_31715773	49.189
Pp01_31716262	49.189
Pp01_32192770	49.264
Pp01_31569218	49.36
Pp01_31600011	49.487
Pp01_31600094	49.487
Pp01_31436603	49.682
Pp01_31450292	49.682
Pp01_31452210	49.682
Pp01_31452224	49.682
Pp01_31452236	49.682
Pp01_31533671	49.682
Pp01_31573615	49.682
Pp01_31573723	49.682
Pp01_31576551	49.682
Pp01_31610682	49.682
Pp01_31640410	49.682
Pp01_31640483	49.682
Pp01_31647707	49.682
Pp01_31681992	49.682
Pp01_31691357	49.682
Pp01_31691380	49.682
Pp01_31698477	49.682
Pp01_31698596	49.682
Pp01_31698615	49.682
Pp01_31706586	49.682
[truncated: 1,867 more rows]

## Sheet: Ad-LG2
Locus	Position (cM)
Pp02_8002697	0
Pp02_8002700	0
Pp02_8002701	0
Pp02_8002734	0
Pp02_8002746	1.299
Pp02_8002740	3.696
Pp02_8002741	3.696
Pp02_8002742	3.696
Pp02_8002743	3.696
Pp02_8002738	4.224
Pp02_8002745	6.082
Pp02_17656265	14.847
Pp02_17656252	15.652
Pp02_17656277	15.652
Pp02_17656249	17.245
Pp02_22127673	24.327
Pp02_22127676	24.327
Pp02_20624545	24.882
Pp02_20626757	24.882
Pp02_20626778	24.882
Pp02_20682308	24.882
Pp02_20682383	24.882
Pp02_20682512	24.882
Pp02_20682758	24.882
Pp02_20682760	24.882
Pp02_20682834	24.882
Pp02_20684475	24.882
Pp02_20684491	24.882
Pp02_20684510	24.882
Pp02_20684525	24.882
Pp02_20684724	24.882
Pp02_20684816	24.882
Pp02_20732378	24.882
Pp02_20732396	24.882
Pp02_20732464	24.882
Pp02_20732473	24.882
Pp02_20732645	24.882
Pp02_20763860	24.882
Pp02_20763937	24.882
Pp02_20764007	24.882
Pp02_20764010	24.882
Pp02_20764052	24.882
Pp02_20855464	24.882
Pp02_20855939	24.882
Pp02_20855945	24.882
Pp02_20855978	24.882
Pp02_20856006	24.882
Pp02_20856469	24.882
Pp02_20856473	24.882
Pp02_20859081	24.882
Pp02_20859102	24.882
Pp02_20859109	24.882
Pp02_20859114	24.882
Pp02_20859182	24.882
Pp02_20859425	24.882
Pp02_20975721	24.882
Pp02_20975757	24.882
Pp02_20975774	24.882
Pp02_20975798	24.882
Pp02_21467989	25.157
Pp02_22014243	25.582
Pp02_21045485	25.865
Pp02_21045863	25.865
Pp02_21091238	25.865
Pp02_21091460	25.865
Pp02_21091463	25.865
Pp02_21093910	25.865
Pp02_21094046	25.865
Pp02_21096687	25.865
Pp02_21096699	25.865
Pp02_21096704	25.865
Pp02_21096718	25.865
Pp02_21209551	25.865
Pp02_21209597	25.865
Pp02_21209853	25.865
Pp02_21209873	25.865
Pp02_21209886	25.865
Pp02_21220205	25.865
Pp02_21220268	25.865
Pp02_21220273	25.865
Pp02_21250510	25.865
Pp02_21262977	25.865
Pp02_21328101	25.865
Pp02_21328240	25.865
Pp02_21328268	25.865
Pp02_21328291	25.865
Pp02_21328327	25.865
Pp02_21328340	25.865
Pp02_21328361	25.865
Pp02_21328366	25.865
Pp02_21328678	25.865
Pp02_21328732	25.865
Pp02_21362928	25.865
Pp02_21384677	25.865
Pp02_21384697	25.865
Pp02_21384771	25.865
Pp02_21384873	25.865
Pp02_21456857	25.865
Pp02_21456868	25.865
Pp02_21463861	25.865
Pp02_21463884	25.865
Pp02_21464033	25.865
Pp02_21467962	25.865
Pp02_21467985	25.865
Pp02_21468024	25.865
Pp02_21468171	25.865
Pp02_21468175	25.865
Pp02_21468187	25.865
Pp02_21468217	25.865
Pp02_21468245	25.865
Pp02_21548921	25.865
Pp02_21549293	25.865
Pp02_21549328	25.865
Pp02_21549341	25.865
Pp02_21579729	25.865
Pp02_21580062	25.865
Pp02_21580121	25.865
Pp02_21580140	25.865
Pp02_21580973	25.865
Pp02_21713266	25.865
Pp02_21713276	25.865
Pp02_21719105	25.865
Pp02_21719365	25.865
Pp02_21719746	25.865
Pp02_21720258	25.865
Pp02_21720293	25.865
Pp02_21721122	25.865
Pp02_21721297	25.865
Pp02_21738484	25.865
Pp02_21738503	25.865
Pp02_21738517	25.865
Pp02_21738535	25.865
Pp02_21738550	25.865
Pp02_21738790	25.865
Pp02_21738852	25.865
Pp02_21752560	25.865
Pp02_21780551	25.865
Pp02_21780553	25.865
Pp02_21816307	25.865
Pp02_21870001	25.865
Pp02_21870005	25.865
Pp02_21870057	25.865
Pp02_21945088	25.865
Pp02_21945097	25.865
Pp02_21955148	25.865
Pp02_21955207	25.865
Pp02_22010565	25.865
Pp02_22010605	25.865
Pp02_22018193	25.865
Pp02_22018413	25.865
Pp02_22019520	25.865
Pp02_22020376	25.865
Pp02_22020391	25.865
Pp02_22020396	25.865
Pp02_22020403	25.865
Pp02_22020481	25.865
Pp02_21362699	25.865
Pp02_21788381	25.865
Pp02_21788606	25.865
Pp02_21788681	25.865
Pp02_22050176	26.723
Pp02_22044459	27.627
Pp02_22044498	27.627
Pp02_22044521	27.627
Pp02_22044526	27.627
Pp02_22047734	27.627
Pp02_22047818	27.627
Pp02_22047822	27.627
Pp02_22047824	27.627
Pp02_22047836	27.627
Pp02_22047841	27.627
Pp02_22047870	27.627
Pp02_22050024	27.627
Pp02_22050029	27.627
Pp02_22108804	27.627
Pp02_22108840	27.627
Pp02_22108841	27.627
Pp02_22109092	27.627
Pp02_22109551	27.627
Pp02_22112761	27.627
Pp02_22112788	27.627
Pp02_22112842	27.627
Pp02_22112843	27.627
Pp02_22112845	27.627
Pp02_22165195	27.627
Pp02_22257448	28.168
Pp02_22242141	29.463
Pp02_22254726	29.463
Pp02_22254797	29.463
Pp02_22254799	29.463
Pp02_22254814	29.463
Pp02_22257490	29.463
Pp02_22257556	29.463
Pp02_22258327	29.463
Pp02_22258335	29.463
Pp02_22283722	29.463
Pp02_22299548	29.463
Pp02_22299558	29.463
Pp02_22299572	29.463
Pp02_22299574	29.463
Pp02_22299609	29.463
Pp02_22299610	29.463
Pp02_22299614	29.463
Pp02_22299624	29.463
Pp02_22299822	29.463
Pp02_22305365	29.463
Pp02_22332798	29.463
Pp02_22332817	29.463
Pp02_22855166	30.349
Pp02_22855169	30.349
Pp02_22855175	30.349
Pp02_22855177	30.349
Pp02_22376863	30.349
Pp02_22376942	30.349
Pp02_22377655	30.349
Pp02_22377920	30.349
Pp02_22377923	30.349
Pp02_22377944	30.349
Pp02_22377948	30.349
Pp02_22380115	30.349
Pp02_22380154	30.349
Pp02_22407477	30.349
Pp02_22441809	30.349
Pp02_22441843	30.349
Pp02_22480046	30.349
Pp02_22480325	30.349
Pp02_22496872	30.349
Pp02_22496875	30.349
Pp02_22509398	30.349
Pp02_22509473	30.349
Pp02_22509487	30.349
Pp02_22518291	30.349
Pp02_22518376	30.349
Pp02_22518520	30.349
Pp02_22519543	30.349
Pp02_22519574	30.349
Pp02_22555134	30.349
Pp02_22555164	30.349
Pp02_22555203	30.349
Pp02_22561085	30.349
Pp02_22564187	30.349
Pp02_22564249	30.349
Pp02_22564270	30.349
Pp02_22606117	30.349
Pp02_22606229	30.349
Pp02_22630347	30.349
Pp02_22664220	30.349
Pp02_22664297	30.349
Pp02_22708244	30.349
Pp02_22708268	30.349
Pp02_22708273	30.349
Pp02_22708277	30.349
Pp02_22708280	30.349
Pp02_22708281	30.349
Pp02_22708283	30.349
Pp02_22708296	30.349
Pp02_22708301	30.349
Pp02_22708303	30.349
Pp02_22708322	30.349
Pp02_22708665	30.349
Pp02_22770794	30.349
Pp02_22770876	30.349
Pp02_22771054	30.349
Pp02_22782668	30.349
Pp02_22787141	30.349
Pp02_22787282	30.349
Pp02_22787300	30.349
Pp02_22800243	30.349
Pp02_22800283	30.349
Pp02_22837803	30.349
Pp02_22857464	30.349
Pp02_22863290	31.212
Pp02_22903254	31.212
Pp02_22903303	31.212
Pp02_22903318	31.212
Pp02_22940481	31.212
Pp02_22940844	31.212
Pp02_22959184	32.091
Pp02_22959223	32.091
Pp02_23020552	32.091
Pp02_23048402	32.091
Pp02_23051236	32.091
Pp02_23051319	32.091
Pp02_23051609	32.091
Pp02_23072090	32.091
Pp02_23072092	32.091
Pp02_23072135	32.091
Pp02_23081267	32.091
Pp02_23081298	32.091
Pp02_23081307	32.091
Pp02_23081319	32.091
Pp02_23081325	32.091
Pp02_23081464	32.091
Pp02_23081489	32.091
Pp02_23122909	32.091
Pp02_23130506	32.091
Pp02_23130873	32.091
Pp02_23159888	32.091
Pp02_23159921	32.091
Pp02_23159933	32.091
Pp02_23160298	32.091
Pp02_23160324	32.091
Pp02_23165080	32.091
Pp02_23165091	32.091
Pp02_23169860	32.091
Pp02_23169875	32.091
Pp02_23169899	32.091
Pp02_23188431	32.091
Pp02_23247899	32.091
Pp02_23247998	32.091
Pp02_22959157	32.091
Pp02_23020985	32.091
Pp02_23021189	32.091
Pp02_23080883	32.275
Pp02_23295624	34.808
Pp02_23295636	34.808
Pp02_23295679	34.808
Pp02_23296025	34.808
Pp02_23302462	34.808
Pp02_23302479	34.808
Pp02_23348985	34.808
Pp02_23348991	34.808
Pp02_23363155	34.808
Pp02_23369010	34.808
Pp02_23406688	34.808
Pp02_23406700	34.808
Pp02_23406737	34.808
Pp02_23406743	34.808
Pp02_23406747	34.808
Pp02_23406748	34.808
Pp02_23406754	34.808
Pp02_23406770	34.808
Pp02_23406786	34.808
Pp02_23449325	34.808
Pp02_23452277	34.808
Pp02_23460215	34.808
Pp02_23460334	34.808
Pp02_23752842	35.492
Pp02_23624914	35.758
Pp02_23624926	35.758
Pp02_23624934	35.758
Pp02_23625025	35.758
Pp02_23625100	35.758
Pp02_23647217	35.758
Pp02_23647247	35.758
Pp02_23647265	35.758
Pp02_23647289	35.758
Pp02_23647373	35.758
Pp02_23647417	35.758
Pp02_23647424	35.758
Pp02_23647428	35.758
Pp02_23647442	35.758
Pp02_23741193	35.758
Pp02_23741359	35.758
Pp02_23763278	35.758
Pp02_23634518	35.758
Pp02_23717117	35.758
Pp02_23798725	36.638
Pp02_23798730	36.638
Pp02_23798744	36.638
Pp02_23798789	36.638
Pp02_23804326	36.638
Pp02_23804337	36.638
Pp02_23804368	36.638
Pp02_23804369	36.638
Pp02_23804371	36.638
Pp02_23804372	36.638
Pp02_23804373	36.638
Pp02_23804374	36.638
Pp02_23804377	36.638
Pp02_23804378	36.638
Pp02_23820201	36.638
Pp02_23820231	36.638
Pp02_23820269	36.638
Pp02_23823848	36.638
Pp02_23841783	36.638
Pp02_23852815	36.908
Pp02_23852528	37.421
Pp02_23852556	37.421
Pp02_23856886	37.769
Pp02_23856895	37.769
Pp02_23857043	37.769
Pp02_23857065	37.769
Pp02_23857073	37.769
Pp02_23857113	37.769
Pp02_23857123	37.769
Pp02_23857126	37.769
Pp02_23857132	37.769
Pp02_23868958	37.769
Pp02_23868964	37.769
Pp02_23868967	37.769
Pp02_23868983	37.769
Pp02_23869020	37.769
Pp02_23869057	37.769
Pp02_23869133	37.769
Pp02_23895631	37.769
Pp02_23895632	37.769
Pp02_23895663	37.769
Pp02_23918017	37.769
Pp02_23918077	37.769
Pp02_23934535	37.769
Pp02_23934780	37.769
Pp02_23957977	37.769
Pp02_23957992	37.769
Pp02_23958017	37.769
Pp02_23932373	38.223
Pp02_23932750	38.223
Pp02_23932841	38.223
Pp02_24288314	38.642
Pp02_24037970	38.752
Pp02_24043937	38.752
Pp02_24044173	38.752
Pp02_24044200	38.752
Pp02_24054322	38.752
Pp02_24054331	38.752
Pp02_24054338	38.752
Pp02_24054354	38.752
Pp02_24054470	38.752
Pp02_24054511	38.752
Pp02_24058348	38.752
Pp02_24106159	38.752
Pp02_24125978	38.752
Pp02_24126054	38.752
Pp02_24215648	38.752
Pp02_24228618	38.752
Pp02_24228626	38.752
Pp02_24228773	38.752
Pp02_24282552	38.752
Pp02_24282613	38.752
Pp02_24282861	38.752
Pp02_24282933	38.752
Pp02_24288715	38.752
Pp02_24293641	38.752
Pp02_24293666	38.752
Pp02_24293701	38.752
Pp02_24293728	38.752
Pp02_24324518	38.752
Pp02_24338861	38.752
Pp02_24339017	38.752
Pp02_24339049	38.752
Pp02_24339200	38.752
Pp02_24377785	38.752
Pp02_24377813	38.752
Pp02_24377823	38.752
Pp02_24377829	38.752
Pp02_24397732	38.752
Pp02_24397747	38.752
Pp02_24408845	38.752
Pp02_24408886	38.752
Pp02_24408922	38.752
Pp02_24414360	38.752
Pp02_24414585	38.752
Pp02_24414605	38.752
Pp02_24427630	38.752
Pp02_24427670	38.752
Pp02_24427671	38.752
Pp02_24427680	38.752
Pp02_24430823	38.752
Pp02_24430852	38.752
Pp02_24431060	38.752
Pp02_24431086	38.752
Pp02_24007734	38.752
Pp02_24282849	38.752
Pp02_24288259	38.752
Pp02_24339032	38.752
Pp02_24414318	38.752
Pp02_24414390	38.752
Pp02_24414589	38.752
Pp02_24453096	39.609
Pp02_24453098	39.609
Pp02_24453487	39.609
Pp02_24496143	41.374
Pp02_24496400	41.374
Pp02_24509759	41.374
Pp02_24532226	41.374
Pp02_24532263	41.374
Pp02_25187532	42.135
Pp02_24558752	42.308
Pp02_24558754	42.308
Pp02_24569705	42.308
Pp02_24569721	42.308
Pp02_24579409	42.308
Pp02_24600262	42.308
Pp02_24600607	42.308
Pp02_24600618	42.308
Pp02_24600644	42.308
Pp02_24600648	42.308
Pp02_24600745	42.308
Pp02_24600769	42.308
Pp02_24600809	42.308
Pp02_24600918	42.308
Pp02_24600939	42.308
Pp02_24600975	42.308
Pp02_24600986	42.308
Pp02_24601016	42.308
Pp02_24604300	42.308
Pp02_24604306	42.308
Pp02_24604315	42.308
Pp02_24641558	42.308
Pp02_24641563	42.308
Pp02_24641588	42.308
Pp02_24641596	42.308
Pp02_24641608	42.308
Pp02_24642140	42.308
Pp02_24642195	42.308
Pp02_24642242	42.308
Pp02_24684206	42.308
Pp02_24684237	42.308
Pp02_24684246	42.308
Pp02_24684491	42.308
Pp02_24684492	42.308
Pp02_24718742	42.308
Pp02_24730881	42.308
Pp02_24749467	42.308
Pp02_24749476	42.308
Pp02_24762481	42.308
Pp02_24763880	42.308
Pp02_24763911	42.308
Pp02_24764228	42.308
Pp02_24764255	42.308
Pp02_24764297	42.308
Pp02_24764336	42.308
Pp02_24764355	42.308
Pp02_24764356	42.308
Pp02_24764397	42.308
Pp02_24764403	42.308
Pp02_24764408	42.308
Pp02_24793053	42.308
Pp02_24793137	42.308
Pp02_24793149	42.308
Pp02_24793201	42.308
Pp02_24793399	42.308
Pp02_24811014	42.308
Pp02_24811172	42.308
Pp02_24811190	42.308
Pp02_24811209	42.308
Pp02_24818254	42.308
Pp02_24862693	42.308
Pp02_24872858	42.308
Pp02_24872907	42.308
Pp02_24910493	42.308
Pp02_24910535	42.308
Pp02_24910669	42.308
Pp02_24912548	42.308
Pp02_24912956	42.308
Pp02_24912988	42.308
Pp02_24949050	42.308
Pp02_24963960	42.308
Pp02_24963962	42.308
Pp02_24972619	42.308
Pp02_24972640	42.308
Pp02_24972743	42.308
Pp02_24979835	42.308
Pp02_24980639	42.308
Pp02_24980690	42.308
Pp02_24980704	42.308
Pp02_24980738	42.308
Pp02_25052086	42.308
Pp02_25052095	42.308
Pp02_25052106	42.308
Pp02_25052354	42.308
Pp02_25052360	42.308
Pp02_25066121	42.308
Pp02_25066185	42.308
Pp02_25099063	42.308
Pp02_25099107	42.308
Pp02_25187034	42.308
Pp02_25204207	42.308
Pp02_25204233	42.308
Pp02_25204253	42.308
Pp02_25204322	42.308
Pp02_24718890	42.308
Pp02_24764714	42.308
Pp02_25065821	42.308
Pp02_24787995	43.048
Pp02_25227140	43.24
Pp02_25240153	43.24
Pp02_25240205	43.24
Pp02_25270894	43.24
Pp02_25272609	43.24
Pp02_25272732	43.24
Pp02_25433953	44.863
Pp02_25451199	44.863
Pp02_25451410	44.863
Pp02_25315149	44.863
Pp02_25401696	44.863
Pp02_25455094	44.863
Pp02_25475392	45.133
Pp02_25504829	45.833
Pp02_25504834	45.833
Pp02_25504866	45.833
Pp02_25505051	45.833
Pp02_25505061	45.833
Pp02_25505065	45.833
Pp02_25638155	46.289
Pp02_25513395	46.774
Pp02_25513398	46.774
Pp02_25513413	46.774
Pp02_25513416	46.774
Pp02_25525711	46.774
Pp02_25525779	46.774
Pp02_25525787	46.774
Pp02_25536347	46.774
Pp02_25555197	46.774
Pp02_25555217	46.774
Pp02_25555220	46.774
Pp02_25555243	46.774
Pp02_25555288	46.774
Pp02_25575182	46.774
Pp02_25575192	46.774
Pp02_25575211	46.774
Pp02_25575358	46.774
Pp02_25575442	46.774
Pp02_25577054	46.774
Pp02_25618573	46.774
Pp02_25628489	46.774
Pp02_25628504	46.774
Pp02_25628549	46.774
Pp02_25628560	46.774
Pp02_25666794	47.651
Pp02_25666802	47.651
Pp02_25666804	47.651
Pp02_25666805	47.651
Pp02_25666807	47.651
Pp02_25666814	47.651
Pp02_25666817	47.651
Pp02_25666836	47.651
Pp02_25666859	47.651
Pp02_25673975	47.651
Pp02_25673981	47.651
Pp02_25673983	47.651
Pp02_25674024	47.651
Pp02_25674043	47.651
Pp02_25674045	47.651
Pp02_25689024	47.651
Pp02_25689069	47.651
Pp02_25689149	47.651
Pp02_25689178	47.651
Pp02_25689242	47.651
Pp02_25710419	47.651
Pp02_25710427	47.651
Pp02_25710436	47.651
Pp02_25710444	47.651
Pp02_25710448	47.651
Pp02_25710506	47.651
Pp02_25710538	47.651
Pp02_25710547	47.651
Pp02_25710586	47.651
Pp02_25710590	47.651
Pp02_25710600	47.651
Pp02_25710759	47.651
Pp02_25710805	47.651
Pp02_25710817	47.651
Pp02_25710832	47.651
Pp02_25710851	47.651
Pp02_25710858	47.651
Pp02_25710970	47.651
Pp02_25736346	47.651
Pp02_25736348	47.651
Pp02_25736370	47.651
Pp02_25738324	47.651
Pp02_25738333	47.651
Pp02_25738338	47.651
Pp02_25738603	47.651
Pp02_25738605	47.651
Pp02_25674087	47.651
Pp02_25755665	48.538
Pp02_25755699	48.538
Pp02_25755878	48.538
Pp02_25755887	48.538
Pp02_25799735	48.538
Pp02_25799784	48.538
Pp02_25800057	48.538
Pp02_25800098	48.538
Pp02_25802667	48.538
Pp02_25802720	48.538
Pp02_25802769	48.538
Pp02_25802801	48.538
Pp02_25840802	49.419
Pp02_25844469	49.419
Pp02_25840493	49.419
Pp02_25844236	49.419
Pp02_25844982	49.419
Pp02_25880117	49.419
Pp02_25880137	49.419
Pp02_25880155	49.419
Pp02_25880180	49.419
Pp02_25880209	49.419
Pp02_25880238	49.419
Pp02_25880273	49.419
Pp02_25880275	49.419
Pp02_25880300	49.419
Pp02_25894252	49.419
Pp02_25894549	49.419
Pp02_25909448	49.419
Pp02_25909661	49.419
Pp02_25909670	49.419
Pp02_25916096	49.419
Pp02_25916107	49.419
Pp02_25916170	49.419
Pp02_25920028	49.419
Pp02_25920244	49.419
Pp02_25948727	49.419
Pp02_25949831	49.419
Pp02_25955833	49.419
Pp02_25955944	49.419
Pp02_25957694	49.419
Pp02_25989424	50.301
Pp02_25987793	50.301
Pp02_25987810	50.301
Pp02_25987823	50.301
Pp02_25987974	50.301
Pp02_25987995	50.301
Pp02_25989297	50.301
Pp02_25989304	50.301
Pp02_25989310	50.301
Pp02_25989325	50.301
Pp02_25998145	50.301
Pp02_25998292	50.301
Pp02_26140732	50.301
Pp02_26140737	50.301
Pp02_26140748	50.301
Pp02_26140755	50.301
Pp02_26140771	50.301
Pp02_26140786	50.301
Pp02_26140857	50.301
Pp02_26160365	50.301
Pp02_26160659	50.301
Pp02_26160691	50.301
Pp02_25989423	50.476
Pp02_25989495	50.476
Pp02_26180723	51.238
Pp02_26180729	51.238
Pp02_26180797	51.238
Pp02_26180817	51.238
Pp02_26180831	51.238
Pp02_26180866	51.238
Pp02_26180902	51.238
Pp02_26180904	51.238
Pp02_26180968	51.238
Pp02_26180979	51.238
Pp02_26181287	51.238
Pp02_26181288	51.238
Pp02_26181385	51.238
Pp02_26181409	51.238
Pp02_26181829	51.238
Pp02_26182244	51.238
Pp02_26197193	51.238
Pp02_26208398	51.238
Pp02_26208726	51.238
Pp02_26209006	51.238
Pp02_26209007	51.238
Pp02_26209058	51.238
Pp02_26384675	52.117
Pp02_26239756	52.117
Pp02_26239994	52.117
Pp02_26253129	52.117
Pp02_26253145	52.117
Pp02_26253172	52.117
Pp02_26253182	52.117
Pp02_26253217	52.117
Pp02_26253275	52.117
Pp02_26253291	52.117
Pp02_26253312	52.117
Pp02_26269641	52.117
Pp02_26269787	52.117
Pp02_26269902	52.117
Pp02_26269944	52.117
Pp02_26270060	52.117
Pp02_26270602	52.117
Pp02_26279141	52.117
Pp02_26279183	52.117
Pp02_26279341	52.117
Pp02_26280432	52.117
Pp02_26280445	52.117
Pp02_26280579	52.117
Pp02_26280600	52.117
Pp02_26296731	52.117
Pp02_26296838	52.117
Pp02_26296905	52.117
Pp02_26306745	52.117
Pp02_26321186	52.117
Pp02_26321534	52.117
Pp02_26334857	52.117
Pp02_26334914	52.117
Pp02_26339979	52.117
Pp02_26340397	52.117
Pp02_26367082	52.117
Pp02_26384777	52.117
Pp02_26463659	52.994
Pp02_26464002	52.994
Pp02_26464003	52.994
Pp02_26656255	52.994
Pp02_26413154	52.994
Pp02_26424665	52.994
Pp02_26463913	52.994
Pp02_26463918	52.994
Pp02_26463939	52.994
Pp02_26463947	52.994
Pp02_26463952	52.994
Pp02_26463956	52.994
Pp02_26464005	52.994
Pp02_26464060	52.994
Pp02_26464085	52.994
Pp02_26464239	52.994
Pp02_26484893	52.994
Pp02_26484954	52.994
Pp02_26485172	52.994
Pp02_26485198	52.994
Pp02_26485221	52.994
Pp02_26485248	52.994
Pp02_26505549	52.994
Pp02_26511300	52.994
Pp02_26511729	52.994
Pp02_26511753	52.994
Pp02_26517409	52.994
Pp02_26517594	52.994
Pp02_26517622	52.994
Pp02_26548880	52.994
Pp02_26549198	52.994
Pp02_26609516	52.994
Pp02_26671671	52.994
Pp02_26671716	52.994
Pp02_26671728	52.994
Pp02_26671730	52.994
Pp02_26671742	52.994
Pp02_26672080	52.994
Pp02_26674486	52.994
Pp02_26674513	52.994
Pp02_26694257	52.994
Pp02_26719325	53.872
Pp02_26779190	53.872
Pp02_26779462	53.872
Pp02_26779668	53.872
Pp02_26860165	53.872
Pp02_26866028	53.872
Pp02_26866115	53.872
Pp02_26866118	53.872
Pp02_26866349	53.872
Pp02_26874943	53.872
Pp02_26874944	53.872
Pp02_26874951	53.872
Pp02_26874952	53.872
Pp02_26875005	53.872
Pp02_26875165	53.872
Pp02_26888981	53.872
Pp02_26889001	53.872
Pp02_26889381	53.872
Pp02_26889469	53.872
Pp02_26889802	53.872
Pp02_26905242	53.872
Pp02_26905308	53.872
Pp02_26963354	54.733
Pp02_26963360	54.733
Pp02_26963389	54.733
Pp02_26963653	54.733
Pp02_26963665	54.733
Pp02_27017510	54.733
Pp02_27026199	54.733
Pp02_27026351	54.733
Pp02_26963607	54.733
Pp02_27447769	55.612
Pp02_27527650	55.612
Pp02_27072455	55.612
Pp02_27079796	55.612
Pp02_27079886	55.612
Pp02_27080151	55.612
Pp02_27098991	55.612
Pp02_27099058	55.612
Pp02_27117706	55.612
Pp02_27117754	55.612
Pp02_27117782	55.612
Pp02_27124342	55.612
Pp02_27136277	55.612
Pp02_27136298	55.612
Pp02_27138583	55.612
Pp02_27138602	55.612
Pp02_27138816	55.612
Pp02_27154102	55.612
Pp02_27154177	55.612
Pp02_27154346	55.612
Pp02_27154352	55.612
Pp02_27184998	55.612
Pp02_27185127	55.612
Pp02_27185161	55.612
Pp02_27185439	55.612
Pp02_27191598	55.612
Pp02_27191599	55.612
Pp02_27191653	55.612
Pp02_27191936	55.612
Pp02_27191947	55.612
Pp02_27191971	55.612
Pp02_27191986	55.612
Pp02_27196947	55.612
Pp02_27204450	55.612
Pp02_27204783	55.612
Pp02_27204790	55.612
Pp02_27208567	55.612
Pp02_27208845	55.612
Pp02_27209361	55.612
Pp02_27209379	55.612
Pp02_27246077	55.612
Pp02_27246381	55.612
Pp02_27263364	55.612
Pp02_27263513	55.612
Pp02_27284686	55.612
Pp02_27298964	55.612
Pp02_27299023	55.612
Pp02_27301040	55.612
Pp02_27328270	55.612
Pp02_27328462	55.612
Pp02_27328473	55.612
Pp02_27328515	55.612
Pp02_27328534	55.612
Pp02_27328580	55.612
Pp02_27343825	55.612
Pp02_27343909	55.612
Pp02_27343939	55.612
Pp02_27344195	55.612
Pp02_27391720	55.612
Pp02_27391744	55.612
Pp02_27391789	55.612
Pp02_27391808	55.612
Pp02_27391906	55.612
Pp02_27391967	55.612
Pp02_27394739	55.612
Pp02_27394749	55.612
Pp02_27402152	55.612
Pp02_27402161	55.612
Pp02_27402198	55.612
Pp02_27405326	55.612
Pp02_27405347	55.612
Pp02_27420263	55.612
Pp02_27447695	55.612
Pp02_27447735	55.612
Pp02_27447747	55.612
Pp02_27447761	55.612
Pp02_27494917	55.612
Pp02_27494931	55.612
Pp02_27495107	55.612
Pp02_27495115	55.612
Pp02_27495150	55.612
Pp02_27495151	55.612
Pp02_27495164	55.612
Pp02_27495173	55.612
Pp02_27510886	55.612
Pp02_27518823	55.612
Pp02_27518827	55.612
Pp02_27519333	55.612
Pp02_27519365	55.612
Pp02_27527275	55.612
Pp02_27527891	55.612
Pp02_27528143	55.612
Pp02_27528148	55.612
Pp02_27528206	55.612
Pp02_27528334	55.612
Pp02_27528521	55.612
Pp02_27589437	55.612
Pp02_27609644	55.612
Pp02_27609685	55.612
Pp02_27609704	55.612
Pp02_27609936	55.612
Pp02_27609950	55.612
Pp02_27609965	55.612
Pp02_27612307	55.612
Pp02_27612328	55.612
Pp02_27612391	55.612
Pp02_27612456	55.612
Pp02_27625247	55.612
Pp02_27625267	55.612
Pp02_27625276	55.612
Pp02_27625340	55.612
Pp02_27656338	55.612
Pp02_27656562	55.612
Pp02_27656586	55.612
Pp02_27656607	55.612
Pp02_27725895	55.612
Pp02_27725932	55.612
Pp02_27726033	55.612
Pp02_27726061	55.612
Pp02_27726092	55.612
Pp02_27735615	55.612
Pp02_27737100	55.612
Pp02_27750411	55.612
Pp02_27765133	55.612
Pp02_27765207	55.612
Pp02_27772571	55.612
Pp02_27772748	55.612
Pp02_27772779	55.612
Pp02_28024236	57.367
Pp02_28025859	57.367
Pp02_27795546	57.367
Pp02_27795555	57.367
Pp02_27798847	57.367
Pp02_27802698	57.367
Pp02_27806502	57.367
Pp02_27806967	57.367
Pp02_27806968	57.367
Pp02_27806973	57.367
Pp02_27806980	57.367
Pp02_27807012	57.367
Pp02_27868656	57.367
Pp02_27868683	57.367
Pp02_27868689	57.367
Pp02_27877215	57.367
Pp02_27947070	57.367
Pp02_27947529	57.367
Pp02_27947583	57.367
Pp02_27947710	57.367
Pp02_27947740	57.367
Pp02_27947802	57.367
Pp02_27947814	57.367
Pp02_27951465	57.367
Pp02_27951870	57.367
Pp02_27951871	57.367
Pp02_27951881	57.367
Pp02_27951882	57.367
Pp02_27952125	57.367
Pp02_27973556	57.367
Pp02_27973582	57.367
Pp02_27983335	57.367
Pp02_28021841	57.367
Pp02_28022010	57.367
Pp02_28024219	57.367
Pp02_28024260	57.367
Pp02_28024320	57.367
Pp02_28026115	57.367
Pp02_28133123	57.367
Pp02_28133519	57.367
Pp02_28133558	57.367
Pp02_28133594	57.367
Pp02_28142002	57.367
Pp02_28142048	57.367
Pp02_28142067	57.367
Pp02_28142079	57.367
Pp02_28142205	57.367
Pp02_28173333	57.367
Pp02_28179227	57.367
Pp02_28179258	57.367
Pp02_28179261	57.367
Pp02_28179495	57.367
Pp02_28179523	57.367
Pp02_28179524	57.367
Pp02_28188234	57.367
Pp02_28188257	57.367
Pp02_28188313	57.367
Pp02_28188343	57.367
Pp02_28208147	57.367
Pp02_28208244	57.367
Pp02_28226416	57.367
Pp02_28228496	57.367
Pp02_28245479	57.367
Pp02_28248727	57.367
Pp02_28248744	57.367
Pp02_28249126	57.367
Pp02_28249161	57.367
Pp02_28276637	57.367
Pp02_28277248	57.367
Pp02_27806473	57.711
Pp02_28303236	58.309
Pp02_28303237	58.309
Pp02_28303238	58.309
Pp02_28305674	58.309
Pp02_28308738	58.309
Pp02_28308804	58.309
Pp02_28332875	59.186
Pp02_28332919	59.186
Pp02_28332951	59.186
Pp02_28333188	59.186
Pp02_28333303	59.186
Pp02_28348139	59.186
Pp02_28348148	59.186
Pp02_28348217	59.186
Pp02_28348457	59.186
Pp02_28364723	59.186
Pp02_28386993	59.186
Pp02_28386997	59.186
Pp02_28386999	59.186
Pp02_28387018	59.186
Pp02_28393405	59.186
Pp02_28405883	59.186
Pp02_28406189	59.186
Pp02_28406253	59.186
Pp02_28422069	59.186
Pp02_28422645	59.186
Pp02_28422715	59.186
Pp02_28422781	59.186
Pp02_28453991	59.186
Pp02_28454135	59.186
Pp02_28508410	60.054
Pp02_28508459	60.054
Pp02_28517031	60.054
Pp02_28518679	60.054
Pp02_28518705	60.054
Pp02_28542176	60.054
Pp02_28542640	60.054
Pp02_28583810	60.054
Pp02_28584101	60.054
Pp02_28604040	60.054
Pp02_28604051	60.054
Pp02_28604141	60.054
Pp02_28640554	60.054
Pp02_28644395	60.054
Pp02_28644477	60.054
Pp02_28644481	60.054
Pp02_28657397	60.054
Pp02_28657532	60.054
Pp02_28657568	60.054
Pp02_28657586	60.054
Pp02_28657832	60.054
Pp02_28658002	60.054
Pp02_28658064	60.054
Pp02_28690777	60.054
Pp02_28690822	60.054
Pp02_28691217	60.054
Pp02_28709858	60.054
Pp02_28710184	60.054
Pp02_28710218	60.054
Pp02_28743539	60.054
Pp02_28743662	60.054
Pp02_28749986	60.054
Pp02_28750056	60.054
Pp02_28765154	60.054
Pp02_28765339	60.054
Pp02_28780206	60.054
Pp02_28799551	60.054
Pp02_28799575	60.054
Pp02_28860698	60.054
Pp02_28860710	60.054
Pp02_28860745	60.054
Pp02_28877499	60.054
Pp02_28877822	60.054
Pp02_28897490	60.054
Pp02_28920998	60.054
Pp02_28921010	60.054
Pp02_28921027	60.054
Pp02_28921076	60.054
Pp02_28921094	60.054
Pp02_28921318	60.054
Pp02_28921373	60.054
Pp02_28932450	60.054
Pp02_28932508	60.054
Pp02_28932667	60.054
Pp02_28644398	60.054
Pp02_28495364	60.523
Pp02_28963165	61.002
Pp02_28963328	61.002
Pp02_28963385	61.002
Pp02_28967230	61.002
Pp02_28981115	61.002
Pp02_28981118	61.002
Pp02_28987495	61.002
Pp02_28997965	61.002
Pp02_29008647	61.002
Pp02_29008691	61.002
Pp02_29008990	61.002
Pp02_29009000	61.002
Pp02_29012457	61.002
Pp02_29012787	61.002
Pp02_29012824	61.002
Pp02_29012832	61.002
Pp02_29032547	61.002
Pp02_29069374	61.002
Pp02_29069383	61.002
Pp02_29069950	61.002
Pp02_29069977	61.002
Pp02_29076809	61.002
Pp02_29076816	61.002
Pp02_29076848	61.002
Pp02_29082061	61.002
Pp02_29082069	61.002
Pp02_29097284	61.002
Pp02_29097672	61.002
Pp02_29097686	61.002
Pp02_29107002	61.002
Pp02_29107010	61.002
Pp02_29107020	61.002
Pp02_29107021	61.002
Pp02_29107026	61.002
Pp02_29107038	61.002
Pp02_29107039	61.002
Pp02_29107044	61.002
Pp02_29107049	61.002
Pp02_29118941	61.002
Pp02_29118994	61.002
Pp02_29119007	61.002
Pp02_29141393	61.002
Pp02_29141432	61.002
Pp02_29152020	61.002
Pp02_29152249	61.002
Pp02_29163704	61.002
Pp02_29179104	61.002
Pp02_29179111	61.002
Pp02_29179117	61.002
Pp02_29179124	61.002
Pp02_29179405	61.002
Pp02_29179415	61.002
Pp02_29194357	61.002
Pp02_29195337	61.002
Pp02_29195344	61.002
Pp02_29195375	61.002
Pp02_29195462	61.002
Pp02_29195479	61.002
Pp02_29195498	61.002
Pp02_29195538	61.002
Pp02_29198382	61.002
Pp02_29198405	61.002
Pp02_29208696	61.002
Pp02_29208724	61.002
Pp02_29218345	61.002
Pp02_29218428	61.002
Pp02_29218450	61.002
Pp02_29218514	61.002
Pp02_29218645	61.002
Pp02_29232674	61.002
Pp02_29232748	61.002
Pp02_29232755	61.002
Pp02_29232794	61.002
Pp02_29233005	61.002
Pp02_29239196	61.002
Pp02_29239250	61.002
Pp02_29281159	61.002
Pp02_29281365	61.002
Pp02_29335200	61.002
Pp02_29345321	61.002
Pp02_29352533	61.002
Pp02_29352584	61.002
Pp02_29354449	61.002
Pp02_29354460	61.002
Pp02_29354704	61.002
Pp02_29355163	61.002
Pp02_29355228	61.002
Pp02_29363920	61.002
Pp02_29364319	61.002
Pp02_29364385	61.002
Pp02_29381299	61.002
Pp02_29384122	61.002
Pp02_29384134	61.002
Pp02_29393728	61.002
Pp02_29393742	61.002
Pp02_29393841	61.002
Pp02_29418894	61.002
Pp02_29419054	61.002
Pp02_29421196	61.002
Pp02_29422580	61.002
Pp02_29422608	61.002
Pp02_29423146	61.002
Pp02_29467053	61.002
Pp02_29467522	61.002
Pp02_29468277	61.002
Pp02_29468341	61.002
Pp02_29475681	61.002
Pp02_29519514	61.002
Pp02_29523636	61.002
Pp02_29524104	61.002
Pp02_29524212	61.002
Pp02_29530943	61.002
Pp02_29539983	61.002
Pp02_29540004	61.002
Pp02_29607981	61.002
Pp02_29612358	61.002
Pp02_29618424	61.002
Pp02_29649563	61.002
Pp02_29649585	61.002
Pp02_29668077	61.002
Pp02_29684538	61.002
Pp02_29684541	61.002
Pp02_29685444	61.002
Pp02_29685448	61.002
Pp02_29685460	61.002
Pp02_29685468	61.002
Pp02_29685773	61.002
Pp02_29685808	61.002
Pp02_29685925	61.002
Pp02_29686232	61.002
Pp02_29718001	61.002
Pp02_29718076	61.002
Pp02_29734541	61.002
Pp02_29734576	61.002
Pp02_29734716	61.002
Pp02_29778152	61.002
Pp02_29778153	61.002
Pp02_29778237	61.002
Pp02_29782047	61.002
Pp02_29782353	61.002
Pp02_29782362	61.002
Pp02_29782369	61.002
Pp02_29782434	61.002
Pp02_29788037	61.002
Pp02_29788385	61.002
Pp02_29799310	61.002
Pp02_29799320	61.002
Pp02_29836990	61.002
Pp02_29836996	61.002
Pp02_29846682	61.002
Pp02_29852129	61.002
Pp02_29858406	61.002
Pp02_29858436	61.002
Pp02_29903360	61.002
Pp02_29903369	61.002
Pp02_29903378	61.002
Pp02_29903423	61.002
Pp02_29903795	61.002
Pp02_29903846	61.002
Pp02_29917044	61.002
Pp02_29941372	61.002
Pp02_29949779	61.002
Pp02_29949803	61.002
Pp02_29950279	61.002
Pp02_29964789	61.002
Pp02_29964820	61.002
Pp02_29964841	61.002
Pp02_29964856	61.002
Pp02_29965050	61.002
Pp02_29993102	61.002
Pp02_30011205	61.002
Pp02_30023302	61.002
Pp02_29009066	61.002
Pp02_29097681	61.002
Pp02_29179318	61.002
Pp02_29232758	61.002
Pp02_29233012	61.002
Pp02_29466721	61.002
Pp02_29772950	61.002
Pp02_29852116	61.002
Pp02_29903352	61.002
Pp02_29965210	61.002
Pp02_29993049	61.002
Pp02_29012936	61.641
Pp02_29012944	61.641
Pp02_29012995	61.641
Pp02_29097695	61.806
Pp02_30093115	62.026
Pp02_30116161	62.026
Pp02_30116162	62.026
Pp02_30116204	62.026
Pp02_30116222	62.026
Pp02_30116928	62.026
Pp02_30122820	62.026
Pp02_30122899	62.026
Pp02_30123216	62.026
Pp02_30123288	62.026
Pp02_30143989	62.902
Pp02_30145394	62.902
Pp02_30145411	62.902
Pp02_30151065	62.902
Pp02_30151067	62.902
Pp02_30151068	62.902
Pp02_30151081	62.902
Pp02_30151122	62.902
Pp02_30151130	62.902
Pp02_30151199	62.902
Pp02_30151213	62.902
Pp02_30151263	62.902
Pp02_30161470	62.902
Pp02_30199658	62.902
Pp02_30219724	62.902

## Sheet: Ad-LG3
Locus	Position (cM)
Pp03_79029	0
Pp03_80932	0
Pp03_80946	0
Pp03_84059	0
Pp03_84410	0
Pp03_104701	0
Pp03_104912	0
Pp03_113703	0
Pp03_113769	0
Pp03_114191	0
Pp03_114252	0
Pp03_114255	0
Pp03_114258	0
Pp03_118971	0
Pp03_119278	0
Pp03_119279	0
Pp03_119287	0
Pp03_155889	0
Pp03_155918	0
Pp03_156024	0
Pp03_163544	0
Pp03_163598	0
Pp03_163784	0
Pp03_163806	0
Pp03_167603	0
Pp03_167604	0
Pp03_167610	0
Pp03_167619	0
Pp03_178315	0
Pp03_178325	0
Pp03_199271	0
Pp03_199283	0
Pp03_250154	0.88
Pp03_250163	0.88
Pp03_251048	0.88
Pp03_251168	0.88
Pp03_300794	0.88
Pp03_300832	0.88
Pp03_300849	0.88
Pp03_301002	0.88
Pp03_334818	0.88
Pp03_354746	0.88
Pp03_383069	0.88
Pp03_404172	0.88
Pp03_425753	0.88
Pp03_425896	0.88
Pp03_425903	0.88
Pp03_425966	0.88
Pp03_507271	0.88
Pp03_528003	0.88
Pp03_568764	0.88
Pp03_568850	0.88
Pp03_568853	0.88
Pp03_678544	0.88
Pp03_678545	0.88
Pp03_678550	0.88
Pp03_678551	0.88
Pp03_678555	0.88
Pp03_678566	0.88
Pp03_678846	0.88
Pp03_382799	0.88
Pp03_687932	1.759
Pp03_687962	1.759
Pp03_688342	1.759
Pp03_694910	1.759
Pp03_694936	1.759
Pp03_694996	1.759
Pp03_695232	1.759
Pp03_748605	1.759
Pp03_748624	1.759
Pp03_754071	1.759
Pp03_754077	1.759
Pp03_754089	1.759
Pp03_759340	1.759
Pp03_760232	1.759
Pp03_760244	1.759
Pp03_790504	1.759
Pp03_790829	1.759
Pp03_864958	1.759
Pp03_864964	1.759
Pp03_864976	1.759
Pp03_865218	1.759
Pp03_865543	1.759
Pp03_1041472	3.506
Pp03_1041510	3.506
Pp03_1089121	3.506
Pp03_1089122	3.506
Pp03_1106156	3.506
Pp03_1181010	4.38
Pp03_1181122	4.38
Pp03_1181159	4.38
Pp03_1181165	4.38
Pp03_1181191	4.38
Pp03_1181192	4.38
Pp03_1181198	4.38
Pp03_1181204	4.38
Pp03_1181211	4.38
Pp03_1205803	4.38
Pp03_1242525	4.38
Pp03_1242557	4.38
Pp03_1260137	4.38
Pp03_1260155	4.38
Pp03_1321305	4.38
Pp03_1328942	4.38
Pp03_1328958	4.38
Pp03_1329162	4.38
Pp03_1329186	4.38
Pp03_1356371	4.38
Pp03_1356608	4.38
Pp03_1356707	4.38
Pp03_1356745	4.38
Pp03_1356763	4.38
Pp03_1363842	4.38
Pp03_1374059	4.38
Pp03_1374102	4.38
Pp03_1374134	4.38
Pp03_1466537	4.38
Pp03_1477269	4.38
Pp03_1477280	4.38
Pp03_1496032	4.38
Pp03_1503650	4.38
Pp03_1503693	4.38
Pp03_1503804	4.38
Pp03_1503880	4.38
Pp03_1517344	4.38
Pp03_1524547	4.38
Pp03_1524702	4.38
Pp03_1676491	4.38
Pp03_1517332	4.38
Pp03_1825762	5.259
Pp03_2000000	5.259
Pp03_2105525	5.259
Pp03_1713877	5.259
Pp03_1741355	5.259
Pp03_1741396	5.259
Pp03_1830689	5.259
Pp03_1830690	5.259
Pp03_1830701	5.259
Pp03_1830730	5.259
Pp03_1830747	5.259
Pp03_1834010	5.259
Pp03_1834292	5.259
Pp03_1834293	5.259
Pp03_1834297	5.259
Pp03_1834311	5.259
Pp03_1834329	5.259
Pp03_1834343	5.259
Pp03_1834349	5.259
Pp03_1842594	5.259
Pp03_1842595	5.259
Pp03_1842605	5.259
Pp03_1903484	5.259
Pp03_1935893	5.259
Pp03_1935894	5.259
Pp03_1935926	5.259
Pp03_1936026	5.259
Pp03_1987957	5.259
Pp03_1995412	5.259
Pp03_1995686	5.259
Pp03_1995728	5.259
Pp03_1999904	5.259
Pp03_2016355	5.259
Pp03_2016398	5.259
Pp03_2016406	5.259
Pp03_2102872	5.259
Pp03_2102952	5.259
Pp03_2102976	5.259
Pp03_2103169	5.259
Pp03_2105553	5.259
Pp03_2108265	5.259
Pp03_2108630	5.259
Pp03_2108637	5.259
Pp03_2108784	5.259
Pp03_2108981	5.259
Pp03_2108984	5.259
Pp03_2109020	5.259
Pp03_2109038	5.259
Pp03_2109971	5.259
Pp03_2144584	5.259
Pp03_2151075	5.259
Pp03_2165970	6.138
Pp03_2166161	6.138
Pp03_2165917	6.138
Pp03_2165953	6.138
Pp03_2165997	6.138
Pp03_2166105	6.138
Pp03_2166139	6.138
Pp03_2166148	6.138
Pp03_2166155	6.138
Pp03_2166181	6.138
Pp03_2166221	6.138
Pp03_2166279	6.138
Pp03_2208365	6.138
Pp03_2208775	6.138
Pp03_2208794	6.138
Pp03_2208795	6.138
Pp03_2223605	6.138
Pp03_2223890	6.138
Pp03_2238120	6.138
Pp03_2238145	6.138
Pp03_2278825	8.796
Pp03_2291933	8.796
Pp03_2291944	8.796
Pp03_2291945	8.796
Pp03_2315558	8.796
Pp03_2315703	8.796
Pp03_2381514	8.796
Pp03_2406724	9.682
Pp03_2495198	9.682
Pp03_2495295	9.682
Pp03_2495300	9.682
Pp03_2600008	9.682
Pp03_2600077	9.682
Pp03_2602926	9.682
Pp03_2602953	9.682
Pp03_2613517	9.682
Pp03_2613570	9.682
Pp03_2613578	9.682
Pp03_2613770	9.682
Pp03_2613804	9.682
Pp03_2637536	9.682
Pp03_2637571	9.682
Pp03_2637593	9.682
Pp03_2647118	9.682
Pp03_2647140	9.682
Pp03_2647146	9.682
Pp03_2647167	9.682
Pp03_2647185	9.682
Pp03_2656536	9.682
Pp03_2656555	9.682
Pp03_2656646	9.682
Pp03_2696726	9.682
Pp03_2696731	9.682
Pp03_2696804	9.682
Pp03_2707711	9.682
Pp03_2707994	9.682
Pp03_2708090	9.682
Pp03_2708941	9.682
Pp03_2708969	9.682
Pp03_2741626	9.682
Pp03_2741875	9.682
Pp03_2895223	13.223
Pp03_2895285	13.223
Pp03_2963540	13.223
Pp03_2963748	13.223
Pp03_3021543	13.223
Pp03_3043929	14.114
Pp03_3044083	14.114
Pp03_3059042	14.114
Pp03_3059084	14.114
Pp03_3090390	14.114
Pp03_3135513	14.114
Pp03_3135935	14.114
Pp03_3150342	14.114
Pp03_3151863	14.114
Pp03_3151905	14.114
Pp03_3151906	14.114
Pp03_3151941	14.114
Pp03_3152120	14.114
Pp03_3190515	14.114
Pp03_3203837	14.114
Pp03_3203966	14.114
Pp03_3237232	14.114
Pp03_3237316	14.114
Pp03_3237346	14.114
Pp03_3237353	14.114
Pp03_3237357	14.114
Pp03_3044111	14.114
Pp03_3387324	14.757
Pp03_3262009	15.068
Pp03_3262147	15.068
Pp03_3262154	15.068
Pp03_3262196	15.068
Pp03_3298100	15.068
Pp03_3299575	15.068
Pp03_3321595	15.068
Pp03_3321767	15.068
Pp03_3321843	15.068
Pp03_3374430	15.068
Pp03_3385044	15.068
Pp03_3393406	15.068
Pp03_3420086	15.068
Pp03_3420166	15.068
Pp03_3420192	15.068
Pp03_3420519	15.068
Pp03_3462651	15.068
Pp03_3514118	15.068
Pp03_3514120	15.068
Pp03_3514168	15.068
Pp03_3385108	15.068
Pp03_3393637	15.068
Pp03_3570631	16.841
Pp03_3570640	16.841
Pp03_3574979	16.841
Pp03_3574985	16.841
Pp03_3575068	16.841
Pp03_3575069	16.841
Pp03_3575087	16.841
Pp03_3575130	16.841
Pp03_3575138	16.841
Pp03_3575165	16.841
Pp03_3579048	16.841
Pp03_3606550	16.841
Pp03_3606755	16.841
Pp03_3606771	16.841
Pp03_3624318	16.841
Pp03_3655444	16.841
Pp03_3698982	16.841
Pp03_3704072	16.841
Pp03_3704094	16.841
Pp03_3721530	16.841
Pp03_3755843	17.722
Pp03_3835939	17.722
Pp03_3835971	17.722
Pp03_3836093	17.722
Pp03_3836102	17.722
Pp03_3836188	17.722
Pp03_3992154	17.722
Pp03_3992161	17.722
Pp03_3992187	17.722
Pp03_3992219	17.722
Pp03_3998325	17.722
Pp03_3998408	17.722
Pp03_4087421	17.722
Pp03_4087664	17.722
Pp03_4130925	17.722
Pp03_4130930	17.722
Pp03_4130933	17.722
Pp03_4130947	17.722
Pp03_4131001	17.722
Pp03_4167947	18.605
Pp03_4214891	18.605
Pp03_4214940	18.605
Pp03_4164511	18.605
Pp03_4164526	18.605
Pp03_4164554	18.605
Pp03_4164613	18.605
Pp03_4164848	18.605
Pp03_4164921	18.605
Pp03_4164945	18.605
Pp03_4168021	18.605
Pp03_4185216	18.605
Pp03_4185277	18.605
Pp03_4185444	18.605
Pp03_4185456	18.605
Pp03_4185522	18.605
Pp03_4185525	18.605
Pp03_4185568	18.605
Pp03_4185966	18.605
Pp03_4186037	18.605
Pp03_4186051	18.605
Pp03_4186085	18.605
Pp03_4186161	18.605
Pp03_4186220	18.605
Pp03_4186255	18.605
Pp03_4221448	18.605
Pp03_4221666	18.605
Pp03_4236193	18.605
Pp03_4236319	18.605
Pp03_4236324	18.605
Pp03_4236355	18.605
Pp03_4236403	18.605
Pp03_4238572	18.605
Pp03_4341864	19.489
Pp03_4341922	19.489
Pp03_4341934	19.489
Pp03_4341989	19.489
Pp03_4357565	19.489
Pp03_4357670	19.489
Pp03_4366596	19.489
Pp03_4366611	19.489
Pp03_4389978	19.489
Pp03_4390010	19.489
Pp03_4423597	19.489
Pp03_4423607	19.489
Pp03_4423620	19.489
Pp03_4423635	19.489
Pp03_4366879	19.489
Pp03_4477007	20.373
Pp03_4477013	20.373
Pp03_4477028	20.373
Pp03_4567497	21.261
Pp03_4567511	21.261
Pp03_5094047	21.261
Pp03_5435984	21.261
Pp03_4519207	21.261
Pp03_4567485	21.261
Pp03_4567495	21.261
Pp03_4567508	21.261
Pp03_4567525	21.261
Pp03_4584196	21.261
Pp03_4785957	21.261
Pp03_4843865	21.261
Pp03_4843899	21.261
Pp03_4844086	21.261
Pp03_4844158	21.261
Pp03_4880118	21.261
Pp03_4880353	21.261
Pp03_4880395	21.261
Pp03_4880528	21.261
Pp03_4915493	21.261
Pp03_4915517	21.261
Pp03_4915762	21.261
Pp03_4997637	21.261
Pp03_4997672	21.261
Pp03_4997696	21.261
Pp03_4997710	21.261
Pp03_4997720	21.261
Pp03_5005336	21.261
Pp03_5005369	21.261
Pp03_5005372	21.261
Pp03_5024817	21.261
Pp03_5024844	21.261
Pp03_5062662	21.261
Pp03_5062937	21.261
Pp03_5064791	21.261
Pp03_5064822	21.261
Pp03_5064830	21.261
Pp03_5094124	21.261
Pp03_5098645	21.261
Pp03_5099953	21.261
Pp03_5099957	21.261
Pp03_5146951	21.261
Pp03_5161271	21.261
Pp03_5161355	21.261
Pp03_5161364	21.261
Pp03_5266506	21.261
Pp03_5266508	21.261
Pp03_5266573	21.261
Pp03_5266583	21.261
Pp03_5266617	21.261
Pp03_5271884	21.261
Pp03_5271984	21.261
Pp03_5273684	21.261
Pp03_5273719	21.261
Pp03_5273753	21.261
Pp03_5273866	21.261
Pp03_5273867	21.261
Pp03_5274021	21.261
Pp03_5274337	21.261
Pp03_5350070	21.261
Pp03_5350087	21.261
Pp03_5350102	21.261
Pp03_5350229	21.261
Pp03_5350231	21.261
Pp03_5435904	21.261
Pp03_5435931	21.261
Pp03_5626387	22.149
Pp03_5636351	22.149
Pp03_5675082	22.149
Pp03_5675090	22.149
Pp03_5675309	22.149
Pp03_5675336	22.149
Pp03_5675371	22.149
Pp03_5694210	22.149
Pp03_5694277	22.149
Pp03_5694303	22.149
Pp03_5707031	22.149
Pp03_5707430	22.149
Pp03_5707447	22.149
Pp03_5707459	22.149
Pp03_5735618	22.149
Pp03_5736163	22.149
Pp03_5739941	22.149
Pp03_5829774	23.039
Pp03_5829776	23.039
Pp03_5829792	23.039
Pp03_5847642	23.039
Pp03_5847695	23.039
Pp03_5848430	23.039
Pp03_5848676	23.039
Pp03_6026629	23.039
Pp03_6040447	23.039
Pp03_6064600	23.039
Pp03_6064934	23.039
Pp03_6064958	23.039
Pp03_6065294	23.039
Pp03_6065307	23.039
Pp03_6065316	23.039
Pp03_6065342	23.039
Pp03_6070646	23.039
Pp03_6070683	23.039
Pp03_6134661	23.039
Pp03_6134664	23.039
Pp03_6134670	23.039
Pp03_6134673	23.039
Pp03_6134674	23.039
Pp03_6134980	23.039
Pp03_6139183	23.039
Pp03_6139192	23.039
Pp03_6139200	23.039
Pp03_6139227	23.039
Pp03_6139365	23.039
Pp03_6187106	23.039
Pp03_6187116	23.039
Pp03_6187342	23.039
Pp03_6187400	23.039
Pp03_6312200	23.039
Pp03_6312235	23.039
Pp03_6312266	23.039
Pp03_6350274	23.039
Pp03_6350278	23.039
Pp03_6351926	23.039
Pp03_6351963	23.039
Pp03_6351981	23.039
Pp03_6386652	23.039
Pp03_6485526	23.929
Pp03_6485538	23.929
Pp03_6485642	23.929
Pp03_6496627	23.929
Pp03_6496709	23.929
Pp03_6496964	23.929
Pp03_6571269	23.929
Pp03_6571317	23.929
Pp03_6571343	23.929
Pp03_6571407	23.929
Pp03_6571884	23.929
Pp03_6571932	23.929
Pp03_6573562	23.929
Pp03_6573877	23.929
Pp03_6644157	23.929
Pp03_6644173	23.929
Pp03_6644223	23.929
Pp03_6644443	23.929
Pp03_6659948	23.929
Pp03_6659952	23.929
Pp03_6660077	23.929
Pp03_6660117	23.929
Pp03_6666658	23.929
Pp03_6666670	23.929
Pp03_6666750	23.929
Pp03_6666781	23.929
Pp03_6666796	23.929
Pp03_6666884	23.929
Pp03_6666905	23.929
Pp03_6818766	23.929
Pp03_6818984	23.929
Pp03_6892591	23.929
Pp03_6892758	23.929
Pp03_6892782	23.929
Pp03_6892792	23.929
Pp03_6893876	23.929
Pp03_6961475	23.929
Pp03_6961478	23.929
Pp03_6961533	23.929
Pp03_6961632	23.929
Pp03_7005103	23.929
Pp03_7005164	23.929
Pp03_7005209	23.929
Pp03_7037513	23.929
Pp03_7125420	23.929
Pp03_7125461	23.929
Pp03_7135092	23.929
Pp03_7135125	23.929
Pp03_7206877	23.929
Pp03_7266200	23.929
Pp03_7266207	23.929
Pp03_7266443	23.929
Pp03_7527567	23.929
Pp03_7527603	23.929
Pp03_7589220	23.929
Pp03_7601171	23.929
Pp03_7621538	23.929
Pp03_7621782	23.929
Pp03_7621799	23.929
Pp03_7661211	23.929
Pp03_7661231	23.929
Pp03_7661239	23.929
Pp03_7661265	23.929
Pp03_7661335	23.929
Pp03_7661364	23.929
Pp03_7661874	23.929
Pp03_7661906	23.929
Pp03_7661942	23.929
Pp03_7662035	23.929
Pp03_7662060	23.929
Pp03_7674001	23.929
Pp03_7674071	23.929
Pp03_7674197	23.929
Pp03_7674208	23.929
Pp03_7674242	23.929
Pp03_7715532	23.929
Pp03_7715676	23.929
Pp03_7716644	23.929
Pp03_7716675	23.929
Pp03_7661901	23.929
Pp03_8112221	24.819
Pp03_8141665	24.819
Pp03_8258345	24.819
Pp03_7890323	24.819
Pp03_7890365	24.819
Pp03_7928429	24.819
Pp03_7928472	24.819
Pp03_7928637	24.819
Pp03_7938469	24.819
Pp03_7938634	24.819
Pp03_7938658	24.819
Pp03_7938727	24.819
Pp03_8141095	24.819
Pp03_8141660	24.819
Pp03_8183543	24.819
Pp03_8230731	24.819
Pp03_8230801	24.819
Pp03_8231263	24.819
Pp03_8238382	24.819
Pp03_8238475	24.819
Pp03_8387241	25.709
Pp03_8388311	25.709
Pp03_8388313	25.709
Pp03_8388535	25.709
Pp03_8443373	25.709
Pp03_8443380	25.709
Pp03_8443543	25.709
Pp03_8443906	25.709
Pp03_8443915	25.709
Pp03_8443921	25.709
Pp03_8443937	25.709
Pp03_8505156	25.709
Pp03_8505189	25.709
Pp03_8505204	25.709
Pp03_8456667	25.709
Pp03_8720842	27.496
Pp03_8720843	27.496
Pp03_8720851	27.496
Pp03_8731459	27.496
Pp03_9153725	27.496
Pp03_9282222	27.496
Pp03_9323012	27.496
Pp03_9323110	27.496
Pp03_9323118	27.496
Pp03_9323159	27.496
Pp03_9323627	27.496
Pp03_9323632	27.496
Pp03_9323674	27.496
Pp03_9323678	27.496
Pp03_9323731	27.496
Pp03_9323747	27.496
Pp03_9323769	27.496
Pp03_9323783	27.496
Pp03_9323792	27.496
Pp03_9323793	27.496
Pp03_9323834	27.496
Pp03_9414248	27.496
Pp03_9414295	27.496
Pp03_9414334	27.496
Pp03_8714410	27.496
Pp03_8720846	27.496
Pp03_8720856	27.496
Pp03_9480422	28.389
Pp03_10019143	28.389
Pp03_10019155	28.389
Pp03_10019191	28.389
Pp03_11427628	31.072
Pp03_12723938	31.072
Pp03_10186593	31.072
Pp03_10186680	31.072
Pp03_10810188	31.072
Pp03_10811391	31.072
Pp03_10811481	31.072
Pp03_10811482	31.072
Pp03_10811483	31.072
Pp03_10811523	31.072
Pp03_10811536	31.072
Pp03_10811545	31.072
Pp03_10950597	31.072
Pp03_10959206	31.072
Pp03_10976521	31.072
Pp03_10976589	31.072
Pp03_11211777	31.072
Pp03_11211962	31.072
Pp03_11212020	31.072
Pp03_11427348	31.072
Pp03_11427357	31.072
Pp03_11427358	31.072
Pp03_11427540	31.072
Pp03_11427573	31.072
Pp03_11437145	31.072
Pp03_11437196	31.072
Pp03_11437202	31.072
Pp03_11437487	31.072
Pp03_11505346	31.072
Pp03_11508623	31.072
Pp03_11564090	31.072
Pp03_11590492	31.072
Pp03_11590520	31.072
Pp03_11590531	31.072
Pp03_11746166	31.072
Pp03_11746211	31.072
Pp03_11905148	31.072
Pp03_11905281	31.072
Pp03_11905287	31.072
Pp03_11905349	31.072
Pp03_12723497	31.072
Pp03_12723547	31.072
Pp03_12724528	31.072
Pp03_13403198	31.966
Pp03_13403341	31.966
Pp03_13403360	31.966
Pp03_13403378	31.966
Pp03_13403381	31.966
Pp03_13509694	31.966
Pp03_13660857	31.966
Pp03_13660957	31.966
Pp03_13661252	31.966
Pp03_13661382	31.966
Pp03_13661406	31.966
Pp03_13737203	31.966
Pp03_13737233	31.966
Pp03_13737372	31.966
Pp03_13912219	31.966
Pp03_13912225	31.966
Pp03_13912235	31.966
Pp03_13912242	31.966
Pp03_13912256	31.966
Pp03_13912276	31.966
Pp03_14052988	31.966
Pp03_14143072	31.966
Pp03_14143090	31.966
Pp03_14144726	31.966
Pp03_14144766	31.966
Pp03_14209339	31.966
Pp03_14209354	31.966
Pp03_14209385	31.966
Pp03_14209411	31.966
Pp03_14209415	31.966
Pp03_14209522	31.966
Pp03_14209563	31.966
Pp03_14346726	31.966
Pp03_14350063	31.966
Pp03_14406397	31.966
Pp03_14406650	31.966
Pp03_14406686	31.966
Pp03_14459053	31.966
Pp03_14459175	31.966
Pp03_14459191	31.966
Pp03_14532510	31.966
Pp03_14532836	31.966
Pp03_14571076	31.966
Pp03_14725233	31.966
Pp03_14757995	31.966
Pp03_15074609	31.966
Pp03_15130377	31.966
Pp03_14346819	31.966
Pp03_14532874	31.966
Pp03_14533085	31.966
Pp03_14539704	31.966
Pp03_14539714	31.966
Pp03_14539729	31.966
Pp03_14539759	31.966
Pp03_14571678	31.966
Pp03_14758103	31.966
Pp03_15130312	31.966
Pp03_14539715	32.105
Pp03_14539723	32.105
Pp03_14539752	32.105
Pp03_14539758	32.105
Pp03_17017672	32.918
Pp03_17017708	32.918
Pp03_17017719	32.918
Pp03_17017740	32.918
Pp03_17017745	32.918
Pp03_17017756	32.918
Pp03_17395409	32.918
Pp03_17395757	32.918
Pp03_17395787	32.918
Pp03_17562032	32.918
Pp03_17562034	32.918
Pp03_17562042	32.918
Pp03_17562312	32.918
Pp03_17562333	32.918
Pp03_17562384	32.918
Pp03_17596903	32.918
Pp03_17597115	32.918
Pp03_15693938	33.812
Pp03_15852837	33.812
Pp03_16200522	33.812
Pp03_16601255	33.812
Pp03_15693749	33.812
Pp03_15693836	33.812
Pp03_15693916	33.812
Pp03_15693956	33.812
Pp03_15847138	33.812
Pp03_15847166	33.812
Pp03_15852819	33.812
Pp03_15852890	33.812
Pp03_15853109	33.812
Pp03_15853202	33.812
Pp03_15881067	33.812
Pp03_15881151	33.812
Pp03_16027430	33.812
Pp03_16027473	33.812
Pp03_16027505	33.812
Pp03_16027623	33.812
Pp03_16030846	33.812
Pp03_16030987	33.812
Pp03_16031003	33.812
Pp03_16087739	33.812
Pp03_16087965	33.812
Pp03_16088014	33.812
Pp03_16094168	33.812
Pp03_16094206	33.812
Pp03_16128747	33.812
Pp03_16128760	33.812
Pp03_16128925	33.812
Pp03_16204403	33.812
Pp03_16204499	33.812
Pp03_16204582	33.812
Pp03_16291265	33.812
Pp03_16291266	33.812
Pp03_16291285	33.812
Pp03_16291324	33.812
Pp03_16348208	33.812
Pp03_16348246	33.812
Pp03_16348270	33.812
Pp03_16348281	33.812
Pp03_16356590	33.812
Pp03_16356643	33.812
Pp03_16407990	33.812
Pp03_16408036	33.812
Pp03_16549595	33.812
Pp03_16549639	33.812
Pp03_16549661	33.812
Pp03_16571805	33.812
Pp03_16571821	33.812
Pp03_16571849	33.812
Pp03_16592761	33.812
Pp03_16592843	33.812
Pp03_16593162	33.812
Pp03_16598912	33.812
Pp03_16601242	33.812
Pp03_16601372	33.812
Pp03_16601404	33.812
Pp03_16635624	33.812
Pp03_16635641	33.812
Pp03_16654442	33.812
Pp03_16693267	33.812
Pp03_16693324	33.812
Pp03_16693419	33.812
Pp03_16693485	33.812
Pp03_16719370	33.812
Pp03_16719427	33.812
Pp03_16719522	33.812
Pp03_16719588	33.812
Pp03_17835913	35.589
Pp03_17835979	35.589
Pp03_17849593	35.589
Pp03_17849650	35.589
Pp03_17849657	35.589
Pp03_18013590	35.589
Pp03_18013648	35.589
Pp03_18020212	35.589
Pp03_18020246	35.589
Pp03_18117430	35.589
Pp03_18117476	35.589
Pp03_18117478	35.589
Pp03_18117542	35.589
Pp03_18119878	35.589
Pp03_18284560	35.589
Pp03_18284598	35.589
Pp03_18284680	35.589
Pp03_18284693	35.589
Pp03_18284697	35.589
Pp03_18284706	35.589
Pp03_18289262	35.589
Pp03_18291258	35.589
Pp03_18291264	35.589
Pp03_18291343	35.589
Pp03_18291445	35.589
Pp03_18291457	35.589
Pp03_18311754	36.476
Pp03_18311866	36.476
Pp03_18311883	36.476
Pp03_18311988	36.476
Pp03_18338191	36.476
Pp03_18398024	36.476
Pp03_18398055	36.476
Pp03_18398068	36.476
Pp03_18415216	36.476
Pp03_18415617	36.476
Pp03_18415619	36.476
Pp03_18415626	36.476
Pp03_18422015	36.476
Pp03_18450257	36.476
Pp03_18450259	36.476
Pp03_18450466	36.476
Pp03_18450529	36.476
Pp03_18450544	36.476
Pp03_18479906	36.476
Pp03_18480016	36.476
Pp03_18480027	36.476
Pp03_18480051	36.476
Pp03_18480077	36.476
Pp03_18483545	36.476
Pp03_18483583	36.476
Pp03_18483599	36.476
Pp03_18526033	36.476
Pp03_18526223	36.476
Pp03_18581430	36.476
Pp03_18583230	36.476
Pp03_18583775	36.476
Pp03_18583776	36.476
Pp03_18587893	36.476
Pp03_18587922	36.476
Pp03_18587932	36.476
Pp03_18588123	36.476
Pp03_18588129	36.476
Pp03_18588208	36.476
Pp03_18702129	36.476
Pp03_18702401	36.476
Pp03_18705532	36.476
Pp03_18705595	36.476
Pp03_18705614	36.476
Pp03_18780057	36.476
Pp03_18811893	36.476
Pp03_18811974	36.476
Pp03_18854869	36.476
Pp03_18855110	36.476
Pp03_18855247	36.476
Pp03_18855307	36.476
Pp03_18903510	36.476
Pp03_18903539	36.476
Pp03_18903616	36.476
Pp03_18903617	36.476
Pp03_18935458	36.476
Pp03_18975064	36.476
Pp03_19035414	36.476
Pp03_19039870	36.476
Pp03_19039931	36.476
Pp03_19040227	36.476
Pp03_19040239	36.476
Pp03_19040693	36.476
Pp03_19058995	36.476
Pp03_19069625	36.476
Pp03_19069655	36.476
Pp03_19069664	36.476
Pp03_19069667	36.476
Pp03_19069683	36.476
Pp03_19069854	36.476
Pp03_19069868	36.476
Pp03_19069880	36.476
Pp03_19090727	36.476
Pp03_19091105	36.476
Pp03_19109726	36.476
Pp03_19109735	36.476
Pp03_19109990	36.476
Pp03_19159237	36.476
Pp03_18587896	36.476
Pp03_19220195	37.367
Pp03_19220223	37.367
Pp03_19220225	37.367
Pp03_19234293	37.367
Pp03_19234447	37.367
Pp03_19234496	37.367
Pp03_19234529	37.367
Pp03_19416078	37.367
Pp03_19416091	37.367
Pp03_19416482	37.367
Pp03_19422415	37.367
Pp03_19422461	37.367
Pp03_19446710	37.367
Pp03_19447081	37.367
Pp03_19453031	37.367
Pp03_19465775	37.367
Pp03_19465817	37.367
Pp03_19465818	37.367
Pp03_19465826	37.367
Pp03_19465828	37.367
Pp03_19466269	37.367
Pp03_19534896	37.367
Pp03_19540773	37.367
Pp03_19540792	37.367
Pp03_19540864	37.367
Pp03_19549861	37.367
Pp03_19549897	37.367
Pp03_19549902	37.367
Pp03_19573472	37.367
Pp03_19573534	37.367
Pp03_19576531	37.367
Pp03_19576731	37.367
Pp03_19576733	37.367
Pp03_19597313	37.367
Pp03_19597454	37.367
Pp03_19597479	37.367
Pp03_19597499	37.367
Pp03_19597530	37.367
Pp03_19567363	37.367
Pp03_20174059	38.251
Pp03_20181709	38.251
Pp03_20181991	38.251
Pp03_20443688	38.251
Pp03_20689766	38.251
Pp03_20689856	38.251
Pp03_20690179	38.251
Pp03_20690323	38.251
Pp03_19631084	38.251
Pp03_19631128	38.251
Pp03_19631165	38.251
Pp03_19631460	38.251
Pp03_19639815	38.251
Pp03_19639837	38.251
Pp03_19639845	38.251
Pp03_19640049	38.251
Pp03_19640120	38.251
Pp03_19642024	38.251
Pp03_19658830	38.251
Pp03_19658964	38.251
Pp03_19658971	38.251
Pp03_19658980	38.251
Pp03_19658998	38.251
Pp03_19659082	38.251
Pp03_19659102	38.251
Pp03_19783077	38.251
Pp03_19783129	38.251
Pp03_19861677	38.251
Pp03_19861810	38.251
Pp03_19870584	38.251
Pp03_19870656	38.251
Pp03_19870979	38.251
Pp03_19873986	38.251
Pp03_19903619	38.251
Pp03_19903657	38.251
Pp03_19951695	38.251
Pp03_19951722	38.251
Pp03_19951767	38.251
Pp03_20034685	38.251
Pp03_20078959	38.251
Pp03_20079015	38.251
Pp03_20079051	38.251
Pp03_20090409	38.251
Pp03_20090587	38.251
Pp03_20090745	38.251
Pp03_20112991	38.251
Pp03_20112999	38.251
Pp03_20138977	38.251
Pp03_20156188	38.251
Pp03_20156202	38.251
Pp03_20156395	38.251
Pp03_20156398	38.251
Pp03_20156404	38.251
Pp03_20156736	38.251
Pp03_20173529	38.251
Pp03_20174063	38.251
Pp03_20174974	38.251
Pp03_20175033	38.251
Pp03_20181422	38.251
Pp03_20181505	38.251
Pp03_20181691	38.251
Pp03_20181730	38.251
Pp03_20181748	38.251
Pp03_20252201	38.251
Pp03_20252268	38.251
Pp03_20252670	38.251
Pp03_20252677	38.251
Pp03_20259050	38.251
Pp03_20316832	38.251
Pp03_20347009	38.251
Pp03_20435025	38.251
Pp03_20435037	38.251
Pp03_20435766	38.251
Pp03_20435780	38.251
Pp03_20435806	38.251
Pp03_20435838	38.251
Pp03_20458985	38.251
Pp03_20459401	38.251
Pp03_20459407	38.251
Pp03_20459419	38.251
Pp03_20460418	38.251
Pp03_20460451	38.251
Pp03_20477680	38.251
Pp03_20477834	38.251
Pp03_20477930	38.251
Pp03_20477955	38.251
Pp03_20478653	38.251
Pp03_20496661	38.251
Pp03_20496669	38.251
Pp03_20496911	38.251
Pp03_20500056	38.251
Pp03_20500257	38.251
Pp03_20515086	38.251
Pp03_20515114	38.251
Pp03_20515144	38.251
Pp03_20519744	38.251
Pp03_20519853	38.251
Pp03_20528291	38.251
Pp03_20528294	38.251
Pp03_20528324	38.251
Pp03_20528371	38.251
Pp03_20528550	38.251
Pp03_20528565	38.251
Pp03_20528660	38.251
Pp03_20528677	38.251
Pp03_20528679	38.251
Pp03_20528745	38.251
Pp03_20528746	38.251
Pp03_20528767	38.251
Pp03_20566803	38.251
Pp03_20566863	38.251
Pp03_20566864	38.251
Pp03_20566870	38.251
Pp03_20566882	38.251
Pp03_20566992	38.251
Pp03_20569270	38.251
Pp03_20607130	38.251
Pp03_20607152	38.251
Pp03_20659704	38.251
Pp03_20663549	38.251
Pp03_20663558	38.251
Pp03_20663745	38.251
Pp03_20663798	38.251
Pp03_20663806	38.251
Pp03_20663979	38.251
Pp03_20663980	38.251
Pp03_20664002	38.251
Pp03_20693435	38.251
Pp03_20710065	38.251
Pp03_20710092	38.251
Pp03_20710094	38.251
Pp03_20750044	38.251
Pp03_20750049	38.251
Pp03_20750298	38.251
Pp03_20806445	38.251
Pp03_20806552	38.251
Pp03_20806601	38.251
Pp03_20806616	38.251
Pp03_20828703	38.251
Pp03_20828799	38.251
Pp03_20828838	38.251
Pp03_20863425	38.251
Pp03_20863428	38.251
Pp03_20863436	38.251
Pp03_20863442	38.251
Pp03_20863444	38.251
Pp03_20863456	38.251
Pp03_20863471	38.251
Pp03_20863473	38.251
Pp03_20863506	38.251
Pp03_20863515	38.251
Pp03_20906112	38.251
Pp03_20906122	38.251
Pp03_20906134	38.251
Pp03_20907707	38.251
Pp03_20907708	38.251
Pp03_20907712	38.251
Pp03_20907716	38.251
Pp03_20908241	38.251
Pp03_20908246	38.251
Pp03_20908261	38.251
Pp03_20908316	38.251
Pp03_20908317	38.251
Pp03_20908376	38.251
Pp03_20938252	38.251
Pp03_20949212	38.251
Pp03_20949251	38.251
Pp03_20949570	38.251
Pp03_20961145	38.251
Pp03_20961148	38.251
Pp03_20961150	38.251
Pp03_20961333	38.251
Pp03_20980695	38.251
Pp03_20980745	38.251
Pp03_20989246	38.251
Pp03_20989290	38.251
Pp03_20992501	38.251
Pp03_20992558	38.251
Pp03_21003446	38.251
Pp03_21003664	38.251
Pp03_21003665	38.251
Pp03_21017739	38.251
Pp03_21023254	38.251
Pp03_21025255	38.251
Pp03_21025264	38.251
Pp03_21025300	38.251
Pp03_21025304	38.251
Pp03_21025342	38.251
Pp03_21025504	38.251
Pp03_21026918	38.251
Pp03_21027143	38.251
Pp03_21042664	38.251
Pp03_21042666	38.251
Pp03_21043140	38.251
Pp03_21043149	38.251
Pp03_21043150	38.251
Pp03_21206155	38.251
Pp03_21206161	38.251
Pp03_21206167	38.251
Pp03_21206218	38.251
Pp03_21206235	38.251
Pp03_21206236	38.251
Pp03_21206250	38.251
Pp03_21206258	38.251
Pp03_21206392	38.251
Pp03_21206413	38.251
Pp03_21238793	38.251
Pp03_21251093	38.251
Pp03_21251098	38.251
Pp03_21251170	38.251
Pp03_21251172	38.251
Pp03_21251262	38.251
Pp03_21251498	38.251
Pp03_21251533	38.251
Pp03_21270704	38.251
Pp03_21270730	38.251
Pp03_21284872	38.251
Pp03_21297464	38.251
Pp03_21297623	38.251
Pp03_21297657	38.251
Pp03_21300901	39.133
Pp03_21300963	39.133
Pp03_21305368	39.133
Pp03_21305370	39.133
Pp03_21305380	39.133
Pp03_21305387	39.133
Pp03_21305442	39.133
Pp03_21305616	39.133
Pp03_21305660	39.133
Pp03_21305704	39.133
Pp03_21305719	39.133
Pp03_21305726	39.133
Pp03_21330228	39.133
Pp03_21330353	39.133
Pp03_21330362	39.133
Pp03_21330377	39.133
Pp03_21330436	39.133
Pp03_21341666	39.133
Pp03_21343519	39.133
Pp03_21343545	39.133
Pp03_21343612	39.133
Pp03_21343627	39.133
Pp03_21361604	39.133
Pp03_21363795	39.133
Pp03_21363817	39.133
Pp03_21422059	39.133
Pp03_21422104	39.133
Pp03_21422350	39.133
Pp03_21422374	39.133
Pp03_21422434	39.133
Pp03_21422443	39.133
Pp03_21447337	39.133
Pp03_21447345	39.133
Pp03_21447389	39.133
Pp03_21449329	39.133
Pp03_21467069	39.133
Pp03_21467135	39.133
Pp03_21467466	39.133
Pp03_21470250	39.133
Pp03_21470301	39.133
Pp03_21470621	39.133
Pp03_21491661	39.133
Pp03_21491669	39.133
Pp03_21491896	39.133
Pp03_21660663	40.016
Pp03_21548116	40.016
Pp03_21548470	40.016
Pp03_21548474	40.016
Pp03_21548480	40.016
Pp03_21548513	40.016
Pp03_21610454	40.016
Pp03_21610869	40.016
Pp03_21645387	40.016
Pp03_21645702	40.016
Pp03_21660884	40.016
Pp03_21682163	40.016
Pp03_21682226	40.016
Pp03_21682235	40.016
Pp03_21710220	40.016
Pp03_21710266	40.016
Pp03_21710287	40.016
Pp03_21710319	40.016
Pp03_21710354	40.016
Pp03_21733743	40.903
Pp03_21733807	40.903
Pp03_21733931	40.903
Pp03_21734014	40.903
Pp03_21734023	40.903
Pp03_21760696	40.903
Pp03_21760843	40.903
Pp03_21760889	40.903
Pp03_21760945	40.903
Pp03_21760956	40.903
Pp03_21761205	40.903
Pp03_21826993	41.789
Pp03_21827010	41.789
Pp03_21827011	41.789
Pp03_21827041	41.789
Pp03_21827078	41.789
Pp03_21827225	41.789
Pp03_21834508	41.789
Pp03_21885464	41.789
Pp03_21885502	41.789
Pp03_21885511	41.789
Pp03_21885524	41.789
Pp03_21885543	41.789
Pp03_21927894	42.674
Pp03_21927953	42.674
Pp03_21927968	42.674
Pp03_21927973	42.674
Pp03_21927976	42.674
Pp03_21928019	42.674
Pp03_21928069	42.674
Pp03_21928088	42.674
Pp03_21928132	42.674
Pp03_21928133	42.674
Pp03_21945501	42.674
Pp03_21945570	42.674
Pp03_21991609	42.674
Pp03_21991642	42.674
Pp03_21993536	42.674
Pp03_21993546	42.674
Pp03_21993552	42.674
Pp03_21993613	42.674
Pp03_22031451	42.674
Pp03_22031479	42.674
Pp03_22031540	42.674
Pp03_22031576	42.674
Pp03_22031789	42.674
Pp03_22075121	43.558
Pp03_22176657	43.558
Pp03_22176704	43.558
Pp03_22178669	43.558
Pp03_22179173	43.558
Pp03_22179184	43.558
Pp03_22179192	43.558
Pp03_22225814	43.558
Pp03_22225835	43.558
Pp03_22225857	43.558
Pp03_22225926	43.558
Pp03_22225958	43.558
Pp03_22225959	43.558
Pp03_22252429	43.558
Pp03_22252544	43.558
Pp03_22252553	43.558
Pp03_22253102	43.558
Pp03_22254587	43.558
Pp03_22255019	43.558
Pp03_22255037	43.558
Pp03_22257278	43.558
Pp03_22284128	43.558
Pp03_22284163	43.558
Pp03_22284234	43.558
Pp03_22294669	43.558
Pp03_22294769	43.558
Pp03_22295360	43.558
Pp03_22295362	43.558
Pp03_22295881	43.558
Pp03_22303301	43.558
Pp03_22339784	43.558
Pp03_22342019	43.558
Pp03_22342050	43.558
Pp03_22342056	43.558
Pp03_22342162	43.558
Pp03_22342205	43.558
Pp03_22342208	43.558
Pp03_22347714	43.558
Pp03_22347778	43.558
Pp03_22379168	43.558
Pp03_22379374	43.558
Pp03_22395752	43.558
Pp03_22529726	43.558
Pp03_22529738	43.558
Pp03_22529745	43.558
Pp03_22529746	43.558
Pp03_22529802	43.558
Pp03_22529809	43.558
Pp03_22529835	43.558
Pp03_22529858	43.558
Pp03_22609841	43.558
Pp03_22609845	43.558
Pp03_22609874	43.558
Pp03_22644101	43.558
Pp03_22659004	43.558
Pp03_22659046	43.558
Pp03_22696477	43.558
Pp03_22696923	43.558
Pp03_22712157	43.558
Pp03_22728030	44.441
Pp03_22749051	44.441
Pp03_22749126	44.441
Pp03_22749138	44.441
Pp03_22749171	44.441
Pp03_22756445	44.441
Pp03_22756469	44.441
Pp03_22756491	44.441
Pp03_22756552	44.441
Pp03_22763074	44.441
Pp03_22768653	44.441
Pp03_22797699	44.441
Pp03_22797750	44.441
Pp03_22797804	44.441
Pp03_22797825	44.441
Pp03_22797836	44.441
Pp03_22797837	44.441
Pp03_22797838	44.441
Pp03_22797839	44.441
Pp03_22797840	44.441
Pp03_22797859	44.441
Pp03_22797861	44.441
Pp03_22797866	44.441
Pp03_22851191	44.441
Pp03_22869381	44.441
Pp03_22869670	44.441
Pp03_22869711	44.441
Pp03_22869715	44.441
Pp03_22869743	44.441
Pp03_22869789	44.441
Pp03_22870178	44.441
Pp03_22870182	44.441
Pp03_22870185	44.441
Pp03_22870245	44.441
Pp03_22907592	44.441
Pp03_22908343	44.441
Pp03_22911786	44.441
Pp03_22911920	44.441
Pp03_22911947	44.441
Pp03_22911959	44.441
Pp03_22911980	44.441
Pp03_22927891	44.441
Pp03_22927953	44.441
Pp03_22928024	44.441
Pp03_22928348	44.441
Pp03_22928351	44.441
Pp03_22928368	44.441
Pp03_23016721	44.441
Pp03_23700994	45.329
Pp03_24109642	45.329
Pp03_24109801	45.329
Pp03_24109807	45.329
Pp03_24109831	45.329
Pp03_24110045	45.329
Pp03_24172900	45.329
Pp03_24172901	45.329
Pp03_24173094	45.329
Pp03_24173117	45.329
Pp03_24173133	45.329
Pp03_24173255	45.329
Pp03_23037925	45.329
Pp03_23038342	45.329
Pp03_23038357	45.329
Pp03_23054782	45.329
Pp03_23104554	45.329
Pp03_23104600	45.329
Pp03_23104606	45.329
Pp03_23104920	45.329
Pp03_23255849	45.329
Pp03_23256167	45.329
Pp03_23256263	45.329
Pp03_23292553	45.329
Pp03_23292797	45.329
Pp03_23292838	45.329
Pp03_23315217	45.329
Pp03_23315509	45.329
Pp03_23315528	45.329
Pp03_23315557	45.329
Pp03_23375408	45.329
Pp03_23375431	45.329
Pp03_23393118	45.329
Pp03_23393163	45.329
Pp03_23393171	45.329
Pp03_23393226	45.329
Pp03_23414294	45.329
Pp03_23416440	45.329
Pp03_23416484	45.329
Pp03_23416488	45.329
Pp03_23416760	45.329
Pp03_23467307	45.329
Pp03_23467317	45.329
Pp03_23467793	45.329
Pp03_23477970	45.329
Pp03_23478323	45.329
Pp03_23478395	45.329
Pp03_23500478	45.329
Pp03_23500571	45.329
Pp03_23532248	45.329
Pp03_23532268	45.329
Pp03_23532281	45.329
Pp03_23542470	45.329
Pp03_23571958	45.329
Pp03_23572000	45.329
Pp03_23592341	45.329
Pp03_23592394	45.329
Pp03_23592395	45.329
Pp03_23618111	45.329
Pp03_23618297	45.329
Pp03_23635359	45.329
Pp03_23635379	45.329
Pp03_23635387	45.329
Pp03_23635755	45.329
Pp03_23669838	45.329
Pp03_23669903	45.329
Pp03_23670037	45.329
Pp03_23671535	45.329
Pp03_23671540	45.329
Pp03_23671606	45.329
Pp03_23688684	45.329
Pp03_23700819	45.329
Pp03_23700827	45.329
Pp03_23700835	45.329
Pp03_23701059	45.329
Pp03_23701069	45.329
Pp03_23726349	45.329
Pp03_23735306	45.329
Pp03_23735330	45.329
Pp03_23777267	45.329
Pp03_23778706	45.329
Pp03_23778743	45.329
Pp03_23830118	45.329
Pp03_23830158	45.329
Pp03_23830360	45.329
Pp03_23835307	45.329
Pp03_23835617	45.329
Pp03_23835618	45.329
Pp03_23843043	45.329
Pp03_23843079	45.329
Pp03_23843088	45.329
Pp03_23847451	45.329
Pp03_23847742	45.329
Pp03_23847753	45.329
Pp03_23847756	45.329
Pp03_23847767	45.329
Pp03_23849083	45.329
Pp03_23861598	45.329
Pp03_23861628	45.329
Pp03_23861646	45.329
Pp03_23874203	45.329
Pp03_23874503	45.329
Pp03_23881828	45.329
Pp03_23917624	45.329
Pp03_23925091	45.329
Pp03_23945649	45.329
Pp03_23947445	45.329
Pp03_23985672	45.329
Pp03_23985770	45.329
Pp03_24103941	45.329
Pp03_24103951	45.329
Pp03_24103955	45.329
Pp03_24103956	45.329
Pp03_24103997	45.329
Pp03_24109592	45.329
Pp03_24109736	45.329
Pp03_24109830	45.329
Pp03_24109978	45.329
Pp03_24110015	45.329
Pp03_24110018	45.329
Pp03_24110026	45.329
Pp03_24110027	45.329
Pp03_24110043	45.329
Pp03_24155847	45.329
Pp03_24155944	45.329
Pp03_24156066	45.329
Pp03_24156072	45.329
Pp03_24172911	45.329
Pp03_24172952	45.329
Pp03_24173101	45.329
Pp03_24173140	45.329
Pp03_24173219	45.329
Pp03_24174210	45.329
Pp03_24174238	45.329
Pp03_24174410	45.329
Pp03_24174411	45.329
Pp03_24202532	45.329
Pp03_24202581	45.329
Pp03_24202943	45.329
Pp03_24203105	45.329
Pp03_24203128	45.329
Pp03_24217823	45.329
Pp03_24239095	45.329
Pp03_24239100	45.329
Pp03_24239112	45.329
Pp03_24239142	45.329
Pp03_24254598	45.329
Pp03_24254643	45.329
Pp03_24254742	45.329
Pp03_24254748	45.329
Pp03_24254763	45.329
Pp03_24279887	45.329
Pp03_24279925	45.329
Pp03_24280003	45.329
Pp03_24283216	45.329
Pp03_24283229	45.329
Pp03_24283244	45.329
Pp03_24283245	45.329
Pp03_24283251	45.329
Pp03_24283256	45.329
Pp03_24283258	45.329
Pp03_24283259	45.329
Pp03_24283266	45.329
Pp03_24283295	45.329
Pp03_24283452	45.329
Pp03_24283457	45.329
Pp03_24283464	45.329
Pp03_24283499	45.329
Pp03_24283667	45.329
Pp03_24283685	45.329
Pp03_24283838	45.329
Pp03_24283970	45.329
Pp03_24300405	45.329
Pp03_24300418	45.329
Pp03_24300433	45.329
Pp03_24300434	45.329
Pp03_24300440	45.329
Pp03_24300445	45.329
Pp03_24300447	45.329
Pp03_24300448	45.329
Pp03_24300455	45.329
Pp03_24300484	45.329
Pp03_24300641	45.329
Pp03_24300646	45.329
Pp03_24300653	45.329
Pp03_24300688	45.329
Pp03_24301027	45.329
Pp03_24301159	45.329
Pp03_24304440	45.329
Pp03_24304479	45.329
Pp03_24305826	45.329
Pp03_24305828	45.329
Pp03_24305829	45.329
Pp03_24305849	45.329
Pp03_24305941	45.329
Pp03_24314765	45.329
Pp03_24314771	45.329
Pp03_24314775	45.329
Pp03_24314785	45.329
Pp03_24314892	45.329
Pp03_24314894	45.329
Pp03_24314983	45.329
Pp03_24315018	45.329
Pp03_24315294	45.329
Pp03_24315323	45.329
Pp03_24315352	45.329
Pp03_24315504	45.329
Pp03_24334478	45.329
Pp03_24334513	45.329
Pp03_24334537	45.329
Pp03_24335247	45.329
Pp03_24335254	45.329
Pp03_24335309	45.329
Pp03_24341561	45.329
Pp03_24341577	45.329
Pp03_24349828	45.329
Pp03_24350129	45.329
Pp03_24350249	45.329
Pp03_24350277	45.329
Pp03_24350282	45.329
Pp03_24356287	45.329
Pp03_24356533	45.329
Pp03_24358578	45.329
Pp03_24402257	46.212
Pp03_24420121	46.212
Pp03_24420252	46.212
Pp03_24420306	46.212
Pp03_24420449	46.212
Pp03_24420458	46.212
Pp03_24420515	46.212
Pp03_24420548	46.212
Pp03_24420656	46.212
Pp03_24424374	46.212
Pp03_24456051	46.212
Pp03_24456266	46.212
Pp03_24456303	46.212
Pp03_24456309	46.212
Pp03_24456786	46.212
Pp03_24457118	46.212
Pp03_24457198	46.212
Pp03_24476165	46.212
Pp03_24476170	46.212
Pp03_24476257	46.212
Pp03_24482340	47.097
Pp03_24484940	47.097
Pp03_24484960	47.097
Pp03_24485205	47.097
Pp03_24502539	47.097
Pp03_24502578	47.097
Pp03_24506464	47.097
Pp03_24522338	47.979
Pp03_24522359	47.979
Pp03_24522379	47.979
Pp03_24524162	47.979
Pp03_24524174	47.979
Pp03_24524305	47.979
Pp03_24524349	47.979
Pp03_24532192	47.979
Pp03_24555505	47.979
Pp03_24555766	47.979
Pp03_24591532	48.858
Pp03_24591547	48.858
Pp03_24592118	48.858
Pp03_24592119	48.858
Pp03_24592153	48.858
Pp03_24593063	48.858
Pp03_24593389	48.858
Pp03_24593412	48.858
Pp03_24596299	48.858
Pp03_24596308	48.858
Pp03_24599638	48.858
Pp03_24599761	48.858
Pp03_24600223	48.858
Pp03_24600343	48.858
Pp03_24627174	48.858
Pp03_24639523	48.858
Pp03_24642266	48.858
Pp03_24642267	48.858
Pp03_24642289	48.858
Pp03_24642612	48.858
Pp03_24642658	48.858
Pp03_24642660	48.858
Pp03_24658998	48.858
Pp03_24659036	48.858
Pp03_24659037	48.858
Pp03_24688087	48.858
Pp03_24688112	48.858
Pp03_24688143	48.858
Pp03_24691174	48.858
Pp03_24691200	48.858
Pp03_24691238	48.858
Pp03_24730781	48.858
Pp03_24730824	48.858
Pp03_24768272	49.734
Pp03_24768424	49.734
Pp03_24770631	49.734
Pp03_24812804	49.734
Pp03_24812876	49.734
Pp03_24859587	49.734
Pp03_24859595	49.734
Pp03_24859758	49.734
Pp03_24859774	49.734
Pp03_24859782	49.734
Pp03_24859826	49.734
Pp03_24859853	49.734
Pp03_24862111	49.734
Pp03_24862374	49.734
Pp03_24865184	49.734
Pp03_24875035	49.734
Pp03_24875040	49.734
Pp03_24875081	49.734
Pp03_24875102	49.734
Pp03_24875104	49.734
Pp03_24740001	49.734
Pp03_24940119	51.477
Pp03_24929699	51.477
Pp03_24956629	51.477
Pp03_24956636	51.477
Pp03_24956654	51.477
Pp03_24956659	51.477
Pp03_24956668	51.477
Pp03_24956685	51.477
Pp03_24956692	51.477
Pp03_24956728	51.477
Pp03_24966269	51.477
Pp03_24966322	51.477
Pp03_24966587	51.477
Pp03_24971992	51.477
Pp03_24972022	51.477
Pp03_24972350	51.477
Pp03_24972394	51.477
Pp03_24972398	51.477
Pp03_24972412	51.477
Pp03_24973232	51.477
Pp03_24973265	51.477
Pp03_24973270	51.477
Pp03_24973537	51.477
Pp03_24973620	51.477
Pp03_24973636	51.477
Pp03_24973641	51.477
Pp03_25173826	52.354
Pp03_25359487	52.354
Pp03_25864517	52.354
Pp03_26048287	52.354
Pp03_25001638	52.354
Pp03_25001702	52.354
Pp03_25001760	52.354
Pp03_25001777	52.354
Pp03_25001800	52.354
Pp03_25049077	52.354
Pp03_25049436	52.354
Pp03_25049714	52.354
Pp03_25049745	52.354
Pp03_25093502	52.354
Pp03_25111983	52.354
Pp03_25112053	52.354
Pp03_25112265	52.354
Pp03_25118278	52.354
Pp03_25118667	52.354
Pp03_25126622	52.354
Pp03_25126681	52.354
Pp03_25158485	52.354
Pp03_25158504	52.354
Pp03_25173462	52.354
Pp03_25173489	52.354
Pp03_25173771	52.354
Pp03_25173783	52.354
Pp03_25174802	52.354
Pp03_25176718	52.354
Pp03_25176724	52.354
Pp03_25176751	52.354
Pp03_25204035	52.354
Pp03_25204103	52.354
Pp03_25212777	52.354
Pp03_25238509	52.354
Pp03_25265121	52.354
Pp03_25265127	52.354
Pp03_25266335	52.354
Pp03_25266404	52.354
Pp03_25274037	52.354
Pp03_25274218	52.354
Pp03_25309653	52.354
Pp03_25309684	52.354
Pp03_25309714	52.354
Pp03_25310043	52.354
Pp03_25315774	52.354
Pp03_25315833	52.354
Pp03_25315843	52.354
Pp03_25316142	52.354
Pp03_25316211	52.354
Pp03_25316212	52.354
Pp03_25316213	52.354
Pp03_25318627	52.354
Pp03_25318674	52.354
Pp03_25353868	52.354
Pp03_25359314	52.354
Pp03_25364583	52.354
Pp03_25364643	52.354
Pp03_25364677	52.354
Pp03_25428384	52.354
Pp03_25428594	52.354
Pp03_25470717	52.354
Pp03_25470724	52.354
Pp03_25529007	52.354
Pp03_25529085	52.354
Pp03_25529101	52.354
Pp03_25535072	52.354
Pp03_25535106	52.354
Pp03_25535107	52.354
Pp03_25535150	52.354
Pp03_25535195	52.354
Pp03_25535209	52.354
Pp03_25536577	52.354
Pp03_25536624	52.354
Pp03_25536636	52.354
Pp03_25546397	52.354
Pp03_25546415	52.354
Pp03_25546757	52.354
Pp03_25570722	52.354
Pp03_25570764	52.354
Pp03_25570794	52.354
Pp03_25575937	52.354
Pp03_25575945	52.354
Pp03_25575994	52.354
Pp03_25578378	52.354
Pp03_25578379	52.354
Pp03_25578385	52.354
Pp03_25578453	52.354
Pp03_25578515	52.354
Pp03_25578534	52.354
Pp03_25578545	52.354
Pp03_25586146	52.354
Pp03_25586534	52.354
Pp03_25610056	52.354
Pp03_25610195	52.354
Pp03_25611467	52.354
Pp03_25611503	52.354
Pp03_25611530	52.354
Pp03_25611598	52.354
Pp03_25611605	52.354
Pp03_25617442	52.354
Pp03_25617508	52.354
Pp03_25617520	52.354
Pp03_25634342	52.354
Pp03_25634402	52.354
Pp03_25634479	52.354
Pp03_25634530	52.354
Pp03_25634588	52.354
Pp03_25634611	52.354
Pp03_25646152	52.354
Pp03_25650168	52.354
Pp03_25650189	52.354
Pp03_25663724	52.354
Pp03_25663802	52.354
Pp03_25684377	52.354
Pp03_25684379	52.354
Pp03_25684496	52.354
Pp03_25730090	52.354
Pp03_25730167	52.354
Pp03_25730527	52.354
Pp03_25739692	52.354
Pp03_25739866	52.354
Pp03_25739939	52.354
Pp03_25739947	52.354
Pp03_25742591	52.354
Pp03_25767830	52.354
Pp03_25767845	52.354
Pp03_25767919	52.354
Pp03_25768141	52.354
Pp03_25768166	52.354
Pp03_25768170	52.354
Pp03_25768179	52.354
Pp03_25768196	52.354
Pp03_25768314	52.354
Pp03_25768326	52.354
Pp03_25768576	52.354
Pp03_25776866	52.354
Pp03_25777016	52.354
Pp03_25777028	52.354
Pp03_25777058	52.354
Pp03_25777324	52.354
Pp03_25777380	52.354
Pp03_25784186	52.354
Pp03_25784278	52.354
Pp03_25786025	52.354
Pp03_25786027	52.354
Pp03_25786035	52.354
Pp03_25786043	52.354
Pp03_25786077	52.354
Pp03_25786088	52.354
Pp03_25786103	52.354
Pp03_25786126	52.354
Pp03_25806624	52.354
Pp03_25806657	52.354
Pp03_25806662	52.354
Pp03_25838237	52.354
Pp03_25850432	52.354
Pp03_25850455	52.354
Pp03_25850482	52.354
Pp03_25850490	52.354
Pp03_25858060	52.354
Pp03_25858067	52.354
Pp03_25861276	52.354
Pp03_25892013	52.354
Pp03_25892078	52.354
Pp03_25904478	52.354
Pp03_25904484	52.354
Pp03_25904787	52.354
Pp03_25904857	52.354
Pp03_25904908	52.354
Pp03_25905176	52.354
Pp03_25905198	52.354
Pp03_25905203	52.354
Pp03_25905207	52.354
Pp03_25917826	52.354
Pp03_25917843	52.354
Pp03_25917844	52.354
Pp03_25917846	52.354
Pp03_25917848	52.354
Pp03_25917849	52.354
Pp03_25917852	52.354
Pp03_25917853	52.354
Pp03_25917856	52.354
Pp03_25917857	52.354
Pp03_25917858	52.354
Pp03_25917859	52.354
Pp03_25917863	52.354
Pp03_25917865	52.354
Pp03_25917910	52.354
Pp03_25918016	52.354
Pp03_25918606	52.354
Pp03_25918742	52.354
Pp03_25918744	52.354
Pp03_25918774	52.354
Pp03_25918810	52.354
Pp03_25918817	52.354
Pp03_25919019	52.354
Pp03_25919166	52.354
Pp03_25919543	52.354
Pp03_25919544	52.354
Pp03_25919547	52.354
Pp03_25919571	52.354
Pp03_25919607	52.354
Pp03_25919637	52.354
Pp03_25928049	52.354
Pp03_25928137	52.354
Pp03_25928173	52.354
Pp03_25928184	52.354
Pp03_25928203	52.354
Pp03_25928208	52.354
Pp03_25928235	52.354
Pp03_25928240	52.354
Pp03_25932785	52.354
Pp03_25979814	52.354
Pp03_25979823	52.354
Pp03_25979862	52.354
Pp03_25979883	52.354
Pp03_25979896	52.354
Pp03_25979906	52.354
Pp03_26007303	52.354
Pp03_26090374	52.354
Pp03_26090386	52.354
Pp03_26090390	52.354
Pp03_26090443	52.354
Pp03_26119527	52.354
Pp03_26125082	52.354
Pp03_26125468	52.354
Pp03_26125477	52.354
Pp03_26125490	52.354
Pp03_26140217	52.354
Pp03_26140236	52.354
Pp03_26140299	52.354
Pp03_26140412	52.354
Pp03_26188670	52.354
Pp03_26195699	52.354
Pp03_26196115	52.354
Pp03_26223276	53.231
[truncated: 128 more rows]

## Sheet: Ad-LG4
Locus	Position (cM)
Pp04_100499	0
Pp04_440782	0
Pp04_622378	0.874
Pp04_564506	0.874
Pp04_906172	1.75
Pp04_1052942	2.624
Pp04_1071117	3.493
Pp04_1053285	3.493
Pp04_1528786	4.364
Pp04_1427905	4.364
Pp04_1769216	5.236
Pp04_1804390	6.109
Pp04_2002685	6.984
Pp04_2633637	6.984
Pp04_3253921	7.862
Pp04_3316445	8.739
Pp04_3483366	9.618
Pp04_3979919	10.496
Pp04_4334485	11.379
Pp04_6242965	12.158
Pp04_4414998	12.332
Pp04_5406251	12.332
Pp04_4589132	12.332
Pp04_6603707	13.215
Pp04_6736719	14.098
Pp04_6762576	14.982
Pp04_6902142	15.87
Pp04_6933762	16.755
Pp04_7067683	17.642
Pp04_7079363	18.531
Pp04_7121693	18.531
Pp04_7407041	19.418
Pp04_7577505	20.305
Pp04_7836071	22.082
Pp04_8038329	22.97
Pp04_8359949	23.855
Pp04_8573579	23.855
Pp04_9671976	24.739
Pp04_9746153	24.739
Pp04_10500364	25.621
Pp04_10408603	25.621
Pp04_10519593	26.501
Pp04_10929748	26.501
Pp04_10929709	26.844
Pp04_11071375	29.223
Pp04_11071364	29.223
Pp04_12105703	30.987
Pp04_12843315	31.866
Pp04_12540290	31.866
Pp04_12568364	32.745
Pp04_13520529	33.622
Pp04_13994348	34.497
Pp04_14733461	34.497
Pp04_13882976	34.497
Pp04_14733361	35.37
Pp04_15742542	37.112
Pp04_15291411	37.112
Pp04_15492857	37.112
Pp04_15493283	37.112
Pp04_15956597	37.982
Pp04_17497773	38.854
Pp04_17762219	39.73

## Sheet: Ad-LG5
Locus	Position (cM)
Pp05_140802	0
Pp05_141006	0
Pp05_278624	0
Pp05_278625	0
Pp05_464224	0
Pp05_464249	0
Pp05_520226	0
Pp05_532911	0
Pp05_570770	0
Pp05_570844	0
Pp05_570875	0
Pp05_570982	0
Pp05_596434	0
Pp05_596744	0
Pp05_618680	0
Pp05_618683	0
Pp05_618965	0
Pp05_618968	0
Pp05_618971	0
Pp05_723001	0
Pp05_723020	0
Pp05_723026	0
Pp05_723039	0
Pp05_791357	0
Pp05_791459	0
Pp05_791788	0
Pp05_856705	0
Pp05_857082	0
Pp05_857115	0
Pp05_857226	0
Pp05_857250	0
Pp05_860098	0
Pp05_864031	0
Pp05_864285	0
Pp05_868553	0
Pp05_868775	0
Pp05_868800	0
Pp05_913076	0
Pp05_913096	0
Pp05_933955	0
Pp05_1033667	0
Pp05_1033976	0
Pp05_1035072	0
Pp05_1035073	0
Pp05_1050442	0
Pp05_1050557	0
Pp05_1050559	0
Pp05_1123036	0
Pp05_1123087	0
Pp05_469621	0
Pp05_469945	0
Pp05_469961	0
Pp05_1212620	0.875
Pp05_1154901	0.875
Pp05_1155280	0.875
Pp05_1155358	0.875
Pp05_1204596	0.875
Pp05_1204605	0.875
Pp05_1212621	0.875
Pp05_1213099	0.875
Pp05_1413115	0.875
Pp05_1413128	0.875
Pp05_1453012	0.875
Pp05_1453108	0.875
Pp05_1503101	0.875
Pp05_1508200	0.875
Pp05_1508414	0.875
Pp05_1640706	1.746
Pp05_1640708	1.746
Pp05_1640774	1.746
Pp05_1757602	2.617
Pp05_1757650	2.617
Pp05_1757651	2.617
Pp05_1757654	2.617
Pp05_1757879	2.617
Pp05_1757915	2.617
Pp05_1803786	2.617
Pp05_1803788	2.617
Pp05_1803789	2.617
Pp05_1803831	2.617
Pp05_1803844	2.617
Pp05_1836077	2.617
Pp05_1891327	2.617
Pp05_1891374	2.617
Pp05_1891378	2.617
Pp05_1891398	2.617
Pp05_1891401	2.617
Pp05_1996498	2.617
Pp05_1996499	2.617
Pp05_1996603	2.617
Pp05_2094348	2.617
Pp05_2116192	2.617
Pp05_2116214	2.617
Pp05_2116224	2.617
Pp05_2268844	2.617
Pp05_2268909	2.617
Pp05_2328983	2.617
Pp05_2328986	2.617
Pp05_2329035	2.617
Pp05_2329089	2.617
Pp05_2329098	2.617
Pp05_2334788	2.617
Pp05_2334796	2.617
Pp05_2334797	2.617
Pp05_2334806	2.617
Pp05_2334822	2.617
Pp05_2421347	2.617
Pp05_2421390	2.617
Pp05_2425130	2.617
Pp05_2507424	2.617
Pp05_2507444	2.617
Pp05_2507497	2.617
Pp05_2592509	2.617
Pp05_2592534	2.617
Pp05_2592552	2.617
Pp05_2592566	2.617
Pp05_2592571	2.617
Pp05_2592576	2.617
Pp05_2721807	2.617
Pp05_2722497	2.617
Pp05_2722663	2.617
Pp05_2754692	2.617
Pp05_2754693	2.617
Pp05_2268682	2.617
Pp05_2768217	4.364
Pp05_3380694	5.239
Pp05_3632032	6.111
Pp05_3719556	6.981
Pp05_4346342	7.858
Pp05_3926898	7.858
Pp05_4382759	8.734
Pp05_4539357	9.611
Pp05_5052527	10.492
Pp05_5374815	11.371
Pp05_6292130	12.255
Pp05_6792000	13.137
Pp05_7891313	14.023
Pp05_8316483	14.023
Pp05_8754250	14.908
Pp05_8920598	15.797
Pp05_9090060	17.579
Pp05_9438753	19.374
Pp05_9726902	22.067
Pp05_9694612	22.067
Pp05_10280104	22.963
Pp05_10738728	23.859
Pp05_11482202	24.755
Pp05_11771383	25.654
Pp05_12518119	26.553
Pp05_13012938	27.447
Pp05_12665763	27.447
Pp05_13249182	28.34
Pp05_13579381	29.234
Pp05_13619934	30.135
Pp05_13815899	31.03
Pp05_13934244	31.924
Pp05_13991873	32.818
Pp05_14200215	33.712
Pp05_14313606	34.607
Pp05_14412801	35.502
Pp05_14509320	36.364
Pp05_14580897	39.039
Pp05_14941489	40.82
Pp05_15212903	41.708
Pp05_15254503	42.598
Pp05_15267126	44.366
Pp05_15440252	45.244
Pp05_15798872	45.976
Pp05_15892406	46.835
Pp05_16215534	47.69
Pp05_16316197	48.538
Pp05_16584469	49.387
Pp05_16747363	50.056
Pp05_17250711	50.877
Pp05_17279400	51.699
Pp05_17381319	52.505
Pp05_17466317	52.905
Pp05_18073342	53.287
Pp05_17631878	54.038
Pp05_17525618	54.46
Pp05_17959342	54.945

## Sheet: Ad-LG6
Locus	Position (cM)
Pp06_146886	0
Pp06_144309	0
Pp06_406965	1.746
Pp06_368551	1.746
Pp06_1166394	2.615
Pp06_877901	2.615
Pp06_1739234	3.485
Pp06_2080130	4.356
Pp06_2413326	5.226
Pp06_2533121	6.099
Pp06_2488098	6.099
Pp06_2685324	6.97
Pp06_2865906	6.97
Pp06_3267177	8.71
Pp06_3400172	9.582
Pp06_3792859	10.454
Pp06_3610632	10.454
Pp06_4042924	11.327
Pp06_4064106	11.327
Pp06_4481105	12.199
Pp06_4225720	12.199
Pp06_4941135	12.199
Pp06_7094741	13.903
Pp06_6313579	13.903
Pp06_7709882	15.657
Pp06_7849487	15.657
Pp06_8056954	17.409
Pp06_9341993	17.73
Pp06_8142303	18.359
Pp06_8964457	18.359
Pp06_8126959	18.359
Pp06_9705415	19.239
Pp06_10019880	19.239
Pp06_11357247	20.123
Pp06_11687034	20.123
Pp06_12212138	21.01
Pp06_12357452	21.897
Pp06_12905128	22.793
Pp06_13257774	22.793
Pp06_13287378	24.589
Pp06_13287245	24.589
Pp06_13428963	25.491
Pp06_13535327	25.491
Pp06_18206027	28.227
Pp06_18769803	29.145
Pp06_18941304	31.906
Pp06_20543933	33.738
Pp06_20949372	34.647
Pp06_21305693	35.549
Pp06_23008765	36.451
Pp06_23565879	37.346
Pp06_23565870	37.346
Pp06_23879203	38.241
Pp06_23907127	39.134
Pp06_24177633	40.024
Pp06_24438795	41.793
Pp06_24557072	42.673
Pp06_24576472	42.673
Pp06_24997862	43.551
Pp06_24576540	43.551
Pp06_24997812	43.551
Pp06_25018539	44.364
Pp06_25337092	44.494
Pp06_25030341	44.494
Pp06_25530145	45.366
Pp06_25701320	46.236
Pp06_26839080	47.105
Pp06_26922178	47.105
Pp06_26998336	47.905
Pp06_27028344	48.039
Pp06_27250511	48.842
Pp06_27089759	48.842
Pp06_27262352	49.707
Pp06_27289528	50.572
Pp06_27435619	51.441
Pp06_27446477	51.441
Pp06_27492268	52.31
Pp06_28158283	53.17
Pp06_28343905	54.034
Pp06_28352215	54.034
Pp06_27492378	54.034
Pp06_28535353	54.9
Pp06_28646865	54.9
Pp06_28268462	55.67
Pp06_29284715	55.67
Pp06_29071328	55.868
Pp06_30281908	55.868

## Sheet: Ad-LG7
Locus	Position (cM)
Pp07_119444	0
Pp07_224652	0.866
Pp07_356088	0.866
Pp07_555835	1.734
Pp07_627076	1.734
Pp07_931125	2.606
Pp07_930553	3.482
Pp07_1308732	3.482
Pp07_1891945	5.253
Pp07_2232285	6.147
Pp07_2230028	6.147
Pp07_11306765	21.095
Pp07_11356505	21.94
Pp07_11620674	22.788
Pp07_11833800	23.226
Pp07_11833771	23.745
Pp07_11809671	23.745
Pp07_12073235	24.265
Pp07_12017459	24.787
Pp07_12040605	24.787
Pp07_12390472	27.84
Pp07_12390709	28.491
Pp07_12423242	29.35
Pp07_12430629	29.35
Pp07_13136214	32.522
Pp07_13276468	32.522
Pp07_13862180	33.414
Pp07_13930664	34.304
Pp07_14051912	34.304
Pp07_14066749	34.304
Pp07_14325411	35.193
Pp07_14468688	35.193
Pp07_14618853	36.084
Pp07_14661820	36.084
Pp07_15139501	38.741
Pp07_15024370	38.839
Pp07_15249771	39.723
Pp07_15476371	40.603
Pp07_16071566	44.109
Pp07_16365446	44.979
Pp07_16392816	44.979
Pp07_16565162	45.845
Pp07_16569880	45.845
Pp07_16878756	46.601
Pp07_16627086	46.732
Pp07_16647560	46.732
Pp07_16648386	47.113
Pp07_17579558	47.739
Pp07_17690190	48.608
Pp07_17823465	49.478
Pp07_17990970	49.478
Pp07_18245695	49.478
Pp07_18707322	50.35
Pp07_18932498	51.219
Pp07_19247675	52.089
Pp07_19364995	52.911
Pp07_19459359	52.911
Pp07_19555457	53.765
Pp07_19747285	55.518
Pp07_19666234	55.518
Pp07_20502238	56.394
Pp07_20525290	56.394
Pp07_21309235	59.911

## Sheet: Ad-LG8
Locus	Position (cM)
Pp08_43718	0
Pp08_470941	0.873
Pp08_1768033	1.74
Pp08_2181237	1.74
Pp08_2336835	3.478
Pp08_2337002	3.478
Pp08_3630957	4.35
Pp08_3741131	5.224
Pp08_3852645	6.09
Pp08_3853703	6.211
Pp08_5512332	8.846
Pp08_11283955	11.5
Pp08_11555267	13.283
Pp08_12451332	14.173
Pp08_12715268	15.06
Pp08_12831161	15.951
Pp08_12984216	16.848
Pp08_13016019	17.741
Pp08_13430372	18.185
Pp08_13460938	18.58
Pp08_13860908	20.379
Pp08_14477113	21.279
Pp08_15455027	22.179
Pp08_15523893	23.079
Pp08_15636303	23.978
Pp08_15726096	24.877
Pp08_15951301	25.779
Pp08_16014269	26.678
Pp08_16456270	28.481
Pp08_17534395	29.382
Pp08_17671237	30.275
Pp08_18408374	31.166
Pp08_18512016	32.055
Pp08_19018962	33.826
Pp08_19146477	34.706
Pp08_19205437	35.589
Pp08_19235334	35.589
Pp08_19316695	36.462
Pp08_19352705	36.462
Pp08_20066903	37.343
Pp08_20093046	38.213
Pp08_20099652	39.084
Pp08_20158654	39.953
Pp08_20183212	39.953
Pp08_20526003	40.821
Pp08_20404947	40.821
Pp08_20657654	41.688
Pp08_20912027	41.688
Pp08_20962026	42.558
Pp08_20970084	42.558
Pp08_21062726	43.427
Pp08_21152581	44.297
Pp08_21253980	44.297
Pp08_21313520	45.167
Pp08_21480077	46.038
Pp08_21472091	46.038
Pp08_21868105	47.781
Pp08_22090796	48.65
Pp08_22054399	48.65
Pp08_22278288	49.521

## Sheet: Fl-LG3
Locus	Position (cM)
Pp03_16571580	0
Pp03_19447091	9.741
Pp03_19447157	9.741
Pp03_19597500	10.613
Pp03_20496647	11.482
Pp03_20806634	11.482
Pp03_20806577	11.482
Pp03_20856593	11.482
Pp03_20856596	11.482
Pp03_20856617	11.482
Pp03_20856651	11.482
Pp03_20989332	13.168
Pp03_22031480	19.047
Pp03_22031766	19.047
Pp03_22031791	19.047
Pp03_22236334	20.682
Pp03_22379231	22.318
Pp03_22749045	22.887
Pp03_22763076	23.113
Pp03_22907670	23.906
Pp03_22908117	23.906
Pp03_23107098	23.906
Pp03_23777225	27.293
Pp03_24174301	28.137
Pp03_24174453	28.137
Pp03_24730819	29.635
Pp03_24730820	29.635
Pp03_24769366	29.635
Pp03_24973602	30.497
Pp03_26322888	37.974
Pp03_26697456	38.861
Pp03_26713380	38.861
Pp03_26713404	38.861
Pp03_26713415	38.861

## Sheet: Fl-LG4
Locus	Position (cM)
Pp04_664236	0
Pp04_664237	0
Pp04_664248	0
Pp04_664303	0
Pp04_664315	0
Pp04_664330	0
Pp04_664264	0.65
Pp04_664317	1.005
Pp04_409897	2.971
Pp04_410087	2.971
Pp04_150654	3.311
Pp04_127950	3.626
Pp04_622416	3.626
Pp04_637405	3.626
Pp04_659627	3.626
Pp04_689573	3.626
Pp04_689612	3.626
Pp04_689693	3.626
Pp04_723854	3.626
Pp04_816357	3.626
Pp04_882531	3.626
Pp04_1071126	3.626
Pp04_1079940	3.626
Pp04_1096965	3.626
Pp04_1097369	3.626
Pp04_1141668	3.626
Pp04_1141719	3.626
Pp04_695615	3.884
Pp04_1769114	4.615
Pp04_1769179	4.615
Pp04_1769310	4.615
Pp04_2535773	8.028
Pp04_2467613	8.028
Pp04_2526785	8.028
Pp04_2972313	9.755
Pp04_3436374	9.755
Pp04_2688213	9.755
Pp04_4573513	19.826
Pp04_4720753	19.826
Pp04_5206065	25.157
Pp04_5297719	25.157
Pp04_5446989	26.033
Pp04_5459782	26.033
Pp04_6056700	26.033
Pp04_6056702	26.033
Pp04_6056723	26.033
Pp04_6056740	26.033
Pp04_6056838	26.033
Pp04_6056840	26.033
Pp04_6056855	26.033
Pp04_5662808	26.909
Pp04_5818545	27.787
Pp04_5861644	27.787

[truncated: 2 more sheets: Fl-LG5, Fl-LG7]
