# Supplementary material for: QTLs Identification for Iron Chlorosis in a Segregating Peach–Almond Progeny Through Double-Digest Sequence-Based Genotyping (SBG)
Source: Front Plant Sci. 2022 May 31;13:872208. doi: 10.3389/fpls.2022.872208 (PMC9194768; doi:10.3389/fpls.2022.872208)
Supplement: Supplementary file 3 [file Table_3.XLS]

## Sheet: Resume
Supplementary Table S3. SNP effect prediction based on their putative effect on annotated genes.
	Pp01	Pp02	Pp03	Pp04	Pp05	Pp06	Pp07	Pp08	Total	Total (%)
MODIFIER
3_prime_UTR_variant	509	160	226	19	37	12	7	7	977	5.1789
5_prime_UTR_variant	252	112	125	3	18	7	13	5	535	2.83594
downstream_gene_variant	3331	1435	1908	99	188	68	112	54	7195	38.1394
intergenic_region	518	233	371	12	28	15	29	7	1213	6.4299
intron_variant	1694	547	832	36	88	24	62	28	3311	17.551
upstream_gene_variant	2596	1131	1524	80	115	63	83	42	5634	29.8648
Total	8900	3618	4986	249	474	189	306	143	18865
LOW
5_prime_UTR_premature_start_codon_gain_variant	39	19	16	3	6	1	1	0	85	3.10106
initiator_codon_variant	1	0	0	0	0	0	0	0	1	0.036483
splice_region_variant	3	0	1	0	0	0	0	0	4	0.145932
splice_region_variant&intron_variant	84	35	52	2	7	3	2	1	186	6.78584
splice_region_variant&synonymous_variant	12	3	6	0	1	0	0	0	22	0.802627
synonymous_variant	1136	419	650	45	78	36	52	27	2443	89.1281
Total	1275	476	725	50	92	40	55	28	2741
MODERATE
missense_variant	975	340	532	42	55	13	24	7	1988	99.1521
missense_variant&splice_region_variant	6	4	7	0	0	0	0	0	17	0.84788
Total	981	344	539	42	55	13	24	7	2005
HIGH
splice_acceptor_variant&intron_variant	1	0	0	0	0	0	0	0	1	6.66667
splice_donor_variant&intron_variant	1	1	2	0	0	0	0	0	4	26.6667
stop_gained	4	2	3	0	0	0	0	0	9	60
stop_lost&splice_region_variant	1	0	0	0	0	0	0	0	1	6.66667
Total	7	3	5	0	0	0	0	0	15
	Pp01	Pp02	Pp03	Pp04	Pp05	Pp06	Pp07	Pp08	Total
MODIFIER	8900	3618	4986	249	474	189	306	143	18865
LOW	1275	476	725	50	92	40	55	28	2741
MODERATE	981	344	539	42	55	13	24	7	2005
HIGH	7	3	5	0	0	0	0	0	15
Total	11163	4441	6255	341	621	242	385	178	23626
	Pp01 (%)	Pp02 (%)	Pp03 (%)	Pp04 (%)	Pp05 (%)	Pp06 (%)	Pp07 (%)	Pp08 (%)	Average (%)
MODIFIER	79.7277	81.4681	79.7122	73.0205	76.3285	78.0992	79.4805	80.3371	78.5217
LOW	11.4217	10.7183	11.5907	14.6628	14.8148	16.5289	14.2857	15.7303	13.7192
MODERATE	8.78796	7.746	8.61711	12.3167	8.85668	5.3719	6.23377	3.93258	7.73284
HIGH	0.0627072	0.0675524	0.0799361	0	0	0	0	0	0.0262744
Total	100	100	100	100	100	100	100	100	100

## Sheet: Pp01
POS	REF	ALT	EFF[*].GENE	EFF[*].IMPACT	EFF[*].EFFECT	EFF[*].AA	EFF[*].BIOTYPE
60632	C	G	Prupe.1G000300	MODIFIER	intron_variant	.	protein_coding
60799	A	G	Prupe.1G000300	MODIFIER	intron_variant	.	protein_coding
73267	C	G	Prupe.1G000300	MODIFIER	downstream_gene_variant	.	protein_coding
73267	C	G	Prupe.1G000400	MODIFIER	intron_variant	.	protein_coding
200925	T	C	Prupe.1G001400	MODERATE	missense_variant	p.Lys239Arg	protein_coding
200925	T	C	Prupe.1G001300	MODIFIER	downstream_gene_variant	.	protein_coding
200960	C	A	Prupe.1G001400	LOW	synonymous_variant	p.Ser227Ser	protein_coding
200960	C	A	Prupe.1G001300	MODIFIER	downstream_gene_variant	.	protein_coding
201481	C	T	Prupe.1G001400	LOW	synonymous_variant	p.Leu105Leu	protein_coding
201481	C	T	Prupe.1G001300	MODIFIER	downstream_gene_variant	.	protein_coding
201505	T	C	Prupe.1G001400	MODERATE	missense_variant	p.Ile97Met	protein_coding
201505	T	C	Prupe.1G001300	MODIFIER	downstream_gene_variant	.	protein_coding
201529	A	G	Prupe.1G001400	LOW	synonymous_variant	p.Cys89Cys	protein_coding
201529	A	G	Prupe.1G001300	MODIFIER	downstream_gene_variant	.	protein_coding
254118	A	G	Prupe.1G002500	MODIFIER	downstream_gene_variant	.	protein_coding
254118	A	G	Prupe.1G002400	MODIFIER	intron_variant	.	protein_coding
289189	G	A	Prupe.1G002700	MODERATE	missense_variant	p.Val31Ile	protein_coding
289189	G	A	Prupe.1G002700	MODIFIER	upstream_gene_variant	.	protein_coding
337650	A	G	Prupe.1G003100	MODIFIER	intron_variant	.	protein_coding
337651	A	T	Prupe.1G003100	MODIFIER	intron_variant	.	protein_coding
361044	T	A	Prupe.1G003300	MODIFIER	upstream_gene_variant	.	protein_coding
361044	T	A	Prupe.1G003500	MODIFIER	downstream_gene_variant	.	protein_coding
361044	T	A	Prupe.1G003400	MODIFIER	intron_variant	.	protein_coding
361105	G	A	Prupe.1G003300	MODIFIER	upstream_gene_variant	.	protein_coding
361105	G	A	Prupe.1G003500	MODIFIER	downstream_gene_variant	.	protein_coding
361105	G	A	Prupe.1G003400	MODIFIER	intron_variant	.	protein_coding
361460	G	A	Prupe.1G003300	MODIFIER	upstream_gene_variant	.	protein_coding
361460	G	A	Prupe.1G003500	MODIFIER	downstream_gene_variant	.	protein_coding
361460	G	A	Prupe.1G003400	MODIFIER	intron_variant	.	protein_coding
367705	C	T	Prupe.1G003500	MODIFIER	5_prime_UTR_variant	.	protein_coding
367705	C	T	Prupe.1G003600	MODIFIER	downstream_gene_variant	.	protein_coding
367705	C	T	Prupe.1G003700	MODIFIER	downstream_gene_variant	.	protein_coding
367867	T	C	Prupe.1G003500	MODIFIER	5_prime_UTR_variant	.	protein_coding
367867	T	C	Prupe.1G003600	MODIFIER	downstream_gene_variant	.	protein_coding
367867	T	C	Prupe.1G003700	MODIFIER	downstream_gene_variant	.	protein_coding
367867	T	C	Prupe.1G003800	MODIFIER	downstream_gene_variant	.	protein_coding
367874	G	A	Prupe.1G003500	MODIFIER	upstream_gene_variant	.	protein_coding
367874	G	A	Prupe.1G003600	MODIFIER	downstream_gene_variant	.	protein_coding
367874	G	A	Prupe.1G003700	MODIFIER	downstream_gene_variant	.	protein_coding
367874	G	A	Prupe.1G003800	MODIFIER	downstream_gene_variant	.	protein_coding
367874	G	A	Prupe.1G003500-Prupe.1G003600	MODIFIER	intergenic_region	.	.
367969	C	T	Prupe.1G003500	MODIFIER	upstream_gene_variant	.	protein_coding
367969	C	T	Prupe.1G003600	MODIFIER	downstream_gene_variant	.	protein_coding
367969	C	T	Prupe.1G003700	MODIFIER	downstream_gene_variant	.	protein_coding
367969	C	T	Prupe.1G003800	MODIFIER	downstream_gene_variant	.	protein_coding
367969	C	T	Prupe.1G003500-Prupe.1G003600	MODIFIER	intergenic_region	.	.
428161	C	A	Prupe.1G004700	MODERATE	missense_variant	p.Gln793Lys	protein_coding
428161	C	A	Prupe.1G004700	MODERATE	missense_variant	p.Gln754Lys	protein_coding
428161	C	A	Prupe.1G004700	MODERATE	missense_variant	p.Gln793Lys	protein_coding
428161	C	A	Prupe.1G004800	MODIFIER	upstream_gene_variant	.	protein_coding
428162	A	G	Prupe.1G004700	MODERATE	missense_variant	p.Gln793Arg	protein_coding
428162	A	G	Prupe.1G004700	MODERATE	missense_variant	p.Gln754Arg	protein_coding
428162	A	G	Prupe.1G004700	MODERATE	missense_variant	p.Gln793Arg	protein_coding
428162	A	G	Prupe.1G004800	MODIFIER	upstream_gene_variant	.	protein_coding
428223	G	T	Prupe.1G004700	LOW	synonymous_variant	p.Ser813Ser	protein_coding
428223	G	T	Prupe.1G004700	LOW	synonymous_variant	p.Ser774Ser	protein_coding
428223	G	T	Prupe.1G004700	LOW	synonymous_variant	p.Ser813Ser	protein_coding
428223	G	T	Prupe.1G004800	MODIFIER	upstream_gene_variant	.	protein_coding
496475	G	C	Prupe.1G005700	MODIFIER	intron_variant	.	protein_coding
496475	G	C	Prupe.1G005700	MODIFIER	intron_variant	.	protein_coding
496979	A	G	Prupe.1G005800	MODIFIER	downstream_gene_variant	.	protein_coding
496979	A	G	Prupe.1G005700	MODIFIER	intron_variant	.	protein_coding
496979	A	G	Prupe.1G005700	MODIFIER	intron_variant	.	protein_coding
497086	C	G	Prupe.1G005800	MODIFIER	downstream_gene_variant	.	protein_coding
497086	C	G	Prupe.1G005700	MODIFIER	intron_variant	.	protein_coding
497086	C	G	Prupe.1G005700	MODIFIER	intron_variant	.	protein_coding
497574	A	C	Prupe.1G005800	MODIFIER	downstream_gene_variant	.	protein_coding
497574	A	C	Prupe.1G005700	MODIFIER	intron_variant	.	protein_coding
497574	A	C	Prupe.1G005700	MODIFIER	intron_variant	.	protein_coding
497618	C	A	Prupe.1G005800	MODIFIER	downstream_gene_variant	.	protein_coding
497618	C	A	Prupe.1G005700	MODIFIER	intron_variant	.	protein_coding
497618	C	A	Prupe.1G005700	MODIFIER	intron_variant	.	protein_coding
559831	G	T	Prupe.1G006600	LOW	synonymous_variant	p.Arg218Arg	protein_coding
559831	G	T	Prupe.1G006600	LOW	synonymous_variant	p.Arg218Arg	protein_coding
559831	G	T	Prupe.1G006700	MODIFIER	upstream_gene_variant	.	protein_coding
559831	G	T	Prupe.1G006500	MODIFIER	downstream_gene_variant	.	protein_coding
559849	G	C	Prupe.1G006600	LOW	synonymous_variant	p.Val224Val	protein_coding
559849	G	C	Prupe.1G006600	LOW	synonymous_variant	p.Val224Val	protein_coding
559849	G	C	Prupe.1G006700	MODIFIER	upstream_gene_variant	.	protein_coding
559849	G	C	Prupe.1G006500	MODIFIER	downstream_gene_variant	.	protein_coding
559963	C	T	Prupe.1G006700	MODIFIER	upstream_gene_variant	.	protein_coding
559963	C	T	Prupe.1G006500	MODIFIER	downstream_gene_variant	.	protein_coding
559963	C	T	Prupe.1G006600	MODIFIER	intron_variant	.	protein_coding
559963	C	T	Prupe.1G006600	MODIFIER	intron_variant	.	protein_coding
560140	A	C	Prupe.1G006600	LOW	synonymous_variant	p.Gly284Gly	protein_coding
560140	A	C	Prupe.1G006600	LOW	synonymous_variant	p.Gly284Gly	protein_coding
560140	A	C	Prupe.1G006700	MODIFIER	upstream_gene_variant	.	protein_coding
560140	A	C	Prupe.1G006500	MODIFIER	downstream_gene_variant	.	protein_coding
586880	A	G	Prupe.1G007000	MODIFIER	intron_variant	.	protein_coding
640399	C	T	Prupe.1G007300	MODIFIER	upstream_gene_variant	.	protein_coding
640399	C	T	Prupe.1G007400	MODIFIER	intron_variant	.	protein_coding
640443	C	T	Prupe.1G007300	MODIFIER	upstream_gene_variant	.	protein_coding
640443	C	T	Prupe.1G007400	MODIFIER	intron_variant	.	protein_coding
640493	C	T	Prupe.1G007300	MODIFIER	upstream_gene_variant	.	protein_coding
640493	C	T	Prupe.1G007400	MODIFIER	intron_variant	.	protein_coding
662114	A	T	Prupe.1G007700	MODIFIER	downstream_gene_variant	.	protein_coding
662114	A	T	Prupe.1G007800	MODIFIER	intron_variant	.	protein_coding
662160	A	T	Prupe.1G007700	MODIFIER	downstream_gene_variant	.	protein_coding
662160	A	T	Prupe.1G007800	MODIFIER	intron_variant	.	protein_coding
673781	G	T	Prupe.1G008000	MODERATE	missense_variant	p.Met256Ile	protein_coding
673781	G	T	Prupe.1G008000	MODERATE	missense_variant	p.Met256Ile	protein_coding
673781	G	T	Prupe.1G007900	MODIFIER	downstream_gene_variant	.	protein_coding
673781	G	T	Prupe.1G008100	MODIFIER	downstream_gene_variant	.	protein_coding
673879	C	G	Prupe.1G008000	MODERATE	missense_variant	p.Thr289Ser	protein_coding
673879	C	G	Prupe.1G008000	MODERATE	missense_variant	p.Thr289Ser	protein_coding
673879	C	G	Prupe.1G007900	MODIFIER	downstream_gene_variant	.	protein_coding
673879	C	G	Prupe.1G008100	MODIFIER	downstream_gene_variant	.	protein_coding
673960	G	A	Prupe.1G008000	MODERATE	missense_variant	p.Ser316Asn	protein_coding
673960	G	A	Prupe.1G008000	MODERATE	missense_variant	p.Ser316Asn	protein_coding
673960	G	A	Prupe.1G008100	MODIFIER	downstream_gene_variant	.	protein_coding
866159	T	G	Prupe.1G011200	MODERATE	missense_variant	p.Ile1576Met	protein_coding
866159	T	G	Prupe.1G011200	MODERATE	missense_variant	p.Ile1551Met	protein_coding
866189	C	T	Prupe.1G011200	LOW	synonymous_variant	p.Ser1586Ser	protein_coding
866189	C	T	Prupe.1G011200	LOW	synonymous_variant	p.Ser1561Ser	protein_coding
883833	A	C	Prupe.1G011400	MODIFIER	upstream_gene_variant	.	protein_coding
883833	A	C	Prupe.1G011400	MODIFIER	intron_variant	.	protein_coding
883970	T	G	Prupe.1G011400	MODERATE	missense_variant	p.Ile112Met	protein_coding
883970	T	G	Prupe.1G011400	LOW	5_prime_UTR_premature_start_codon_gain_variant	.	protein_coding
883970	T	G	Prupe.1G011400	MODIFIER	5_prime_UTR_variant	.	protein_coding
898564	C	T	Prupe.1G011700	MODERATE	missense_variant	p.Val265Ile	protein_coding
898564	C	T	Prupe.1G011600	MODIFIER	upstream_gene_variant	.	protein_coding
898564	C	T	Prupe.1G011800	MODIFIER	upstream_gene_variant	.	protein_coding
903807	C	T	Prupe.1G011800	MODIFIER	5_prime_UTR_variant	.	protein_coding
903807	C	T	Prupe.1G011700	MODIFIER	upstream_gene_variant	.	protein_coding
921348	G	A	Prupe.1G012100	LOW	synonymous_variant	p.Ser321Ser	protein_coding
921348	G	A	Prupe.1G012200	MODIFIER	upstream_gene_variant	.	protein_coding
921348	G	A	Prupe.1G012000	MODIFIER	downstream_gene_variant	.	protein_coding
921375	C	T	Prupe.1G012100	LOW	synonymous_variant	p.Glu312Glu	protein_coding
921375	C	T	Prupe.1G012200	MODIFIER	upstream_gene_variant	.	protein_coding
921375	C	T	Prupe.1G012000	MODIFIER	downstream_gene_variant	.	protein_coding
921408	C	T	Prupe.1G012100	LOW	synonymous_variant	p.Glu301Glu	protein_coding
921408	C	T	Prupe.1G012200	MODIFIER	upstream_gene_variant	.	protein_coding
921408	C	T	Prupe.1G012000	MODIFIER	downstream_gene_variant	.	protein_coding
921417	G	A	Prupe.1G012100	LOW	synonymous_variant	p.Pro298Pro	protein_coding
921417	G	A	Prupe.1G012200	MODIFIER	upstream_gene_variant	.	protein_coding
921417	G	A	Prupe.1G012000	MODIFIER	downstream_gene_variant	.	protein_coding
921420	A	G	Prupe.1G012100	LOW	synonymous_variant	p.Asp297Asp	protein_coding
921420	A	G	Prupe.1G012200	MODIFIER	upstream_gene_variant	.	protein_coding
921420	A	G	Prupe.1G012000	MODIFIER	downstream_gene_variant	.	protein_coding
921426	A	G	Prupe.1G012100	LOW	synonymous_variant	p.Tyr295Tyr	protein_coding
921426	A	G	Prupe.1G012200	MODIFIER	upstream_gene_variant	.	protein_coding
921426	A	G	Prupe.1G012000	MODIFIER	downstream_gene_variant	.	protein_coding
921453	A	T	Prupe.1G012100	LOW	synonymous_variant	p.Gly286Gly	protein_coding
921453	A	T	Prupe.1G012200	MODIFIER	upstream_gene_variant	.	protein_coding
921453	A	T	Prupe.1G012000	MODIFIER	downstream_gene_variant	.	protein_coding
921939	G	A	Prupe.1G012100	LOW	synonymous_variant	p.Leu124Leu	protein_coding
921939	G	A	Prupe.1G012200	MODIFIER	upstream_gene_variant	.	protein_coding
921939	G	A	Prupe.1G012000	MODIFIER	downstream_gene_variant	.	protein_coding
921969	A	T	Prupe.1G012100	MODERATE	missense_variant	p.His114Gln	protein_coding
921969	A	T	Prupe.1G012200	MODIFIER	upstream_gene_variant	.	protein_coding
921969	A	T	Prupe.1G012000	MODIFIER	downstream_gene_variant	.	protein_coding
1006993	G	A	Prupe.1G013200	MODIFIER	intron_variant	.	protein_coding
1006993	G	A	Prupe.1G013200	MODIFIER	intron_variant	.	protein_coding
1007026	T	A	Prupe.1G013200	MODIFIER	intron_variant	.	protein_coding
1007026	T	A	Prupe.1G013200	MODIFIER	intron_variant	.	protein_coding
1007054	G	A	Prupe.1G013200	MODIFIER	intron_variant	.	protein_coding
1007054	G	A	Prupe.1G013200	MODIFIER	intron_variant	.	protein_coding
1007081	C	T	Prupe.1G013200	MODIFIER	intron_variant	.	protein_coding
1007081	C	T	Prupe.1G013200	MODIFIER	intron_variant	.	protein_coding
1015016	C	T	Prupe.1G013500	MODIFIER	upstream_gene_variant	.	protein_coding
1015016	C	T	Prupe.1G013200	MODIFIER	downstream_gene_variant	.	protein_coding
1015016	C	T	Prupe.1G013400	MODIFIER	downstream_gene_variant	.	protein_coding
1015016	C	T	Prupe.1G013300	MODIFIER	intron_variant	.	protein_coding
1015016	C	T	Prupe.1G013300	MODIFIER	intron_variant	.	protein_coding
1016426	G	T	Prupe.1G013300	MODIFIER	3_prime_UTR_variant	.	protein_coding
1016426	G	T	Prupe.1G013300	MODIFIER	3_prime_UTR_variant	.	protein_coding
1016426	G	T	Prupe.1G013500	MODIFIER	upstream_gene_variant	.	protein_coding
1016426	G	T	Prupe.1G013600	MODIFIER	upstream_gene_variant	.	protein_coding
1016426	G	T	Prupe.1G013200	MODIFIER	downstream_gene_variant	.	protein_coding
1016426	G	T	Prupe.1G013300	MODIFIER	downstream_gene_variant	.	protein_coding
1016426	G	T	Prupe.1G013400	MODIFIER	intron_variant	.	protein_coding
1016476	A	G	Prupe.1G013500	MODIFIER	upstream_gene_variant	.	protein_coding
1016476	A	G	Prupe.1G013600	MODIFIER	upstream_gene_variant	.	protein_coding
1016476	A	G	Prupe.1G013200	MODIFIER	downstream_gene_variant	.	protein_coding
1016476	A	G	Prupe.1G013300	MODIFIER	downstream_gene_variant	.	protein_coding
1016476	A	G	Prupe.1G013400	MODIFIER	intron_variant	.	protein_coding
1016523	G	C	Prupe.1G013500	MODIFIER	upstream_gene_variant	.	protein_coding
1016523	G	C	Prupe.1G013600	MODIFIER	upstream_gene_variant	.	protein_coding
1016523	G	C	Prupe.1G013200	MODIFIER	downstream_gene_variant	.	protein_coding
1016523	G	C	Prupe.1G013300	MODIFIER	downstream_gene_variant	.	protein_coding
1016523	G	C	Prupe.1G013400	MODIFIER	intron_variant	.	protein_coding
1016530	G	A	Prupe.1G013500	MODIFIER	upstream_gene_variant	.	protein_coding
1016530	G	A	Prupe.1G013600	MODIFIER	upstream_gene_variant	.	protein_coding
1016530	G	A	Prupe.1G013200	MODIFIER	downstream_gene_variant	.	protein_coding
1016530	G	A	Prupe.1G013300	MODIFIER	downstream_gene_variant	.	protein_coding
1016530	G	A	Prupe.1G013400	MODIFIER	intron_variant	.	protein_coding
1034903	T	C	Prupe.1G013700	LOW	synonymous_variant	p.Pro442Pro	protein_coding
1034903	T	C	Prupe.1G013800	MODIFIER	upstream_gene_variant	.	protein_coding
1034903	T	C	Prupe.1G014000	MODIFIER	upstream_gene_variant	.	protein_coding
1034903	T	C	Prupe.1G013900	MODIFIER	downstream_gene_variant	.	protein_coding
1034903	T	C	Prupe.1G013700	MODIFIER	intron_variant	.	protein_coding
1034915	A	G	Prupe.1G013700	LOW	synonymous_variant	p.Pro446Pro	protein_coding
1034915	A	G	Prupe.1G013800	MODIFIER	upstream_gene_variant	.	protein_coding
1034915	A	G	Prupe.1G014000	MODIFIER	upstream_gene_variant	.	protein_coding
1034915	A	G	Prupe.1G013900	MODIFIER	downstream_gene_variant	.	protein_coding
1034915	A	G	Prupe.1G013700	MODIFIER	intron_variant	.	protein_coding
1035062	C	T	Prupe.1G013700	MODERATE	missense_variant	p.Thr464Ile	protein_coding
1035062	C	T	Prupe.1G013700	LOW	synonymous_variant	p.Tyr495Tyr	protein_coding
1035062	C	T	Prupe.1G013800	MODIFIER	upstream_gene_variant	.	protein_coding
1035062	C	T	Prupe.1G014000	MODIFIER	upstream_gene_variant	.	protein_coding
1035062	C	T	Prupe.1G013900	MODIFIER	downstream_gene_variant	.	protein_coding
1035563	T	C	Prupe.1G013800	MODIFIER	upstream_gene_variant	.	protein_coding
1035563	T	C	Prupe.1G014000	MODIFIER	upstream_gene_variant	.	protein_coding
1035563	T	C	Prupe.1G013700	MODIFIER	downstream_gene_variant	.	protein_coding
1035563	T	C	Prupe.1G013900	MODIFIER	downstream_gene_variant	.	protein_coding
1035563	T	C	Prupe.1G013700-Prupe.1G013800	MODIFIER	intergenic_region	.	.
1035564	G	T	Prupe.1G013800	MODIFIER	upstream_gene_variant	.	protein_coding
1035564	G	T	Prupe.1G014000	MODIFIER	upstream_gene_variant	.	protein_coding
1035564	G	T	Prupe.1G013700	MODIFIER	downstream_gene_variant	.	protein_coding
1035564	G	T	Prupe.1G013900	MODIFIER	downstream_gene_variant	.	protein_coding
1035564	G	T	Prupe.1G013700-Prupe.1G013800	MODIFIER	intergenic_region	.	.
1035611	G	C	Prupe.1G013800	MODIFIER	upstream_gene_variant	.	protein_coding
1035611	G	C	Prupe.1G014000	MODIFIER	upstream_gene_variant	.	protein_coding
1035611	G	C	Prupe.1G013700	MODIFIER	downstream_gene_variant	.	protein_coding
1035611	G	C	Prupe.1G013900	MODIFIER	downstream_gene_variant	.	protein_coding
1035611	G	C	Prupe.1G013700-Prupe.1G013800	MODIFIER	intergenic_region	.	.
1040609	C	G	Prupe.1G013900	MODIFIER	upstream_gene_variant	.	protein_coding
1040609	C	G	Prupe.1G013800	MODIFIER	downstream_gene_variant	.	protein_coding
1040609	C	G	Prupe.1G014100	MODIFIER	downstream_gene_variant	.	protein_coding
1040609	C	G	Prupe.1G014000	MODIFIER	intron_variant	.	protein_coding
1040614	A	G	Prupe.1G013900	MODIFIER	upstream_gene_variant	.	protein_coding
1040614	A	G	Prupe.1G013800	MODIFIER	downstream_gene_variant	.	protein_coding
1040614	A	G	Prupe.1G014100	MODIFIER	downstream_gene_variant	.	protein_coding
1040614	A	G	Prupe.1G014000	MODIFIER	intron_variant	.	protein_coding
1040779	C	T	Prupe.1G014000	LOW	synonymous_variant	p.Asn80Asn	protein_coding
1040779	C	T	Prupe.1G013900	MODIFIER	upstream_gene_variant	.	protein_coding
1040779	C	T	Prupe.1G013800	MODIFIER	downstream_gene_variant	.	protein_coding
1040779	C	T	Prupe.1G014100	MODIFIER	downstream_gene_variant	.	protein_coding
1142308	G	A	Prupe.1G015900	MODIFIER	upstream_gene_variant	.	protein_coding
1142308	G	A	Prupe.1G016000	MODIFIER	intron_variant	.	protein_coding
1142308	G	A	Prupe.1G016000	MODIFIER	intron_variant	.	protein_coding
1189843	G	T	Prupe.1G017100	MODIFIER	5_prime_UTR_variant	.	protein_coding
1189843	G	T	Prupe.1G016900	MODIFIER	upstream_gene_variant	.	protein_coding
1189843	G	T	Prupe.1G017200	MODIFIER	upstream_gene_variant	.	protein_coding
1189843	G	T	Prupe.1G016800	MODIFIER	downstream_gene_variant	.	protein_coding
1189843	G	T	Prupe.1G017000	MODIFIER	downstream_gene_variant	.	protein_coding
1189843	G	T	Prupe.1G017300	MODIFIER	downstream_gene_variant	.	protein_coding
1189882	C	T	Prupe.1G017100	MODIFIER	5_prime_UTR_variant	.	protein_coding
1189882	C	T	Prupe.1G016900	MODIFIER	upstream_gene_variant	.	protein_coding
1189882	C	T	Prupe.1G017200	MODIFIER	upstream_gene_variant	.	protein_coding
1189882	C	T	Prupe.1G016800	MODIFIER	downstream_gene_variant	.	protein_coding
1189882	C	T	Prupe.1G017000	MODIFIER	downstream_gene_variant	.	protein_coding
1189882	C	T	Prupe.1G017300	MODIFIER	downstream_gene_variant	.	protein_coding
1198293	C	A	Prupe.1G017300	MODIFIER	upstream_gene_variant	.	protein_coding
1198293	C	A	Prupe.1G017400	MODIFIER	intron_variant	.	protein_coding
1198293	C	A	Prupe.1G017400	MODIFIER	intron_variant	.	protein_coding
1208545	A	T	Prupe.1G017500	MODIFIER	upstream_gene_variant	.	protein_coding
1208545	A	T	Prupe.1G017600	MODIFIER	upstream_gene_variant	.	protein_coding
1208545	A	T	Prupe.1G017700	MODIFIER	intron_variant	.	protein_coding
1208568	G	A	Prupe.1G017500	MODIFIER	upstream_gene_variant	.	protein_coding
1208568	G	A	Prupe.1G017600	MODIFIER	upstream_gene_variant	.	protein_coding
1208568	G	A	Prupe.1G017700	MODIFIER	intron_variant	.	protein_coding
1208648	T	A	Prupe.1G017500	MODIFIER	upstream_gene_variant	.	protein_coding
1208648	T	A	Prupe.1G017600	MODIFIER	upstream_gene_variant	.	protein_coding
1208648	T	A	Prupe.1G017700	MODIFIER	intron_variant	.	protein_coding
1208674	G	A	Prupe.1G017700	HIGH	splice_donor_variant&intron_variant	.	protein_coding
1208674	G	A	Prupe.1G017500	MODIFIER	upstream_gene_variant	.	protein_coding
1208674	G	A	Prupe.1G017600	MODIFIER	upstream_gene_variant	.	protein_coding
1208706	A	G	Prupe.1G017700	LOW	synonymous_variant	p.Phe241Phe	protein_coding
1208706	A	G	Prupe.1G017500	MODIFIER	upstream_gene_variant	.	protein_coding
1208706	A	G	Prupe.1G017600	MODIFIER	upstream_gene_variant	.	protein_coding
1208712	G	C	Prupe.1G017700	MODERATE	missense_variant	p.His239Gln	protein_coding
1208712	G	C	Prupe.1G017500	MODIFIER	upstream_gene_variant	.	protein_coding
1208712	G	C	Prupe.1G017600	MODIFIER	upstream_gene_variant	.	protein_coding
1258585	G	C	Prupe.1G018000	MODERATE	missense_variant	p.Ser246Arg	protein_coding
1259052	A	G	Prupe.1G018000	MODERATE	missense_variant	p.Ser91Pro	protein_coding
1272828	T	G	Prupe.1G018200	LOW	synonymous_variant	p.Val546Val	protein_coding
1272828	T	G	Prupe.1G018100	MODIFIER	downstream_gene_variant	.	protein_coding
1302639	A	C	Prupe.1G018800	MODERATE	missense_variant	p.Phe811Cys	protein_coding
1302639	A	C	Prupe.1G018600	MODIFIER	upstream_gene_variant	.	protein_coding
1302639	A	C	Prupe.1G018700	MODIFIER	upstream_gene_variant	.	protein_coding
1302639	A	C	Prupe.1G018500	MODIFIER	downstream_gene_variant	.	protein_coding
1302639	A	C	Prupe.1G018900	MODIFIER	downstream_gene_variant	.	protein_coding
1331543	C	T	Prupe.1G019100	MODIFIER	intron_variant	.	protein_coding
1331679	T	C	Prupe.1G019100	LOW	synonymous_variant	p.Arg346Arg	protein_coding
1331720	T	C	Prupe.1G019100	MODERATE	missense_variant	p.Met360Thr	protein_coding
1333428	T	G	Prupe.1G019100	MODERATE	missense_variant	p.Phe724Cys	protein_coding
1333428	T	G	Prupe.1G019100	MODERATE	missense_variant	p.Phe723Cys	protein_coding
1393235	C	T	Prupe.1G019900	LOW	synonymous_variant	p.Ser377Ser	protein_coding
1393252	G	A	Prupe.1G019900	LOW	splice_region_variant&intron_variant	.	protein_coding
1393265	A	G	Prupe.1G019900	MODIFIER	intron_variant	.	protein_coding
1459439	C	T	Prupe.1G020900	MODIFIER	upstream_gene_variant	.	protein_coding
1459439	C	T	Prupe.1G020700	MODIFIER	downstream_gene_variant	.	protein_coding
1459439	C	T	Prupe.1G020800	MODIFIER	downstream_gene_variant	.	protein_coding
1459439	C	T	Prupe.1G020700-Prupe.1G020800	MODIFIER	intergenic_region	.	.
1459456	A	C	Prupe.1G020900	MODIFIER	upstream_gene_variant	.	protein_coding
1459456	A	C	Prupe.1G020700	MODIFIER	downstream_gene_variant	.	protein_coding
1459456	A	C	Prupe.1G020800	MODIFIER	downstream_gene_variant	.	protein_coding
1459456	A	C	Prupe.1G020700-Prupe.1G020800	MODIFIER	intergenic_region	.	.
1459482	T	C	Prupe.1G020900	MODIFIER	upstream_gene_variant	.	protein_coding
1459482	T	C	Prupe.1G020700	MODIFIER	downstream_gene_variant	.	protein_coding
1459482	T	C	Prupe.1G020800	MODIFIER	downstream_gene_variant	.	protein_coding
1459482	T	C	Prupe.1G020700-Prupe.1G020800	MODIFIER	intergenic_region	.	.
1459537	C	G	Prupe.1G020900	MODIFIER	upstream_gene_variant	.	protein_coding
1459537	C	G	Prupe.1G020700	MODIFIER	downstream_gene_variant	.	protein_coding
1459537	C	G	Prupe.1G020800	MODIFIER	downstream_gene_variant	.	protein_coding
1459537	C	G	Prupe.1G020700-Prupe.1G020800	MODIFIER	intergenic_region	.	.
1510293	A	G	Prupe.1G021900	MODERATE	missense_variant	p.Val137Ala	protein_coding
1510293	A	G	Prupe.1G021800	MODIFIER	upstream_gene_variant	.	protein_coding
1510293	A	G	Prupe.1G022000	MODIFIER	downstream_gene_variant	.	protein_coding
1510317	C	T	Prupe.1G021900	LOW	splice_region_variant&intron_variant	.	protein_coding
1510317	C	T	Prupe.1G021800	MODIFIER	upstream_gene_variant	.	protein_coding
1510317	C	T	Prupe.1G022000	MODIFIER	downstream_gene_variant	.	protein_coding
1510347	C	T	Prupe.1G021800	MODIFIER	upstream_gene_variant	.	protein_coding
1510347	C	T	Prupe.1G022000	MODIFIER	downstream_gene_variant	.	protein_coding
1510347	C	T	Prupe.1G021900	MODIFIER	intron_variant	.	protein_coding
1515949	G	C	Prupe.1G022100	MODERATE	missense_variant	p.Ser447Cys	protein_coding
1515949	G	C	Prupe.1G021900	MODIFIER	upstream_gene_variant	.	protein_coding
1515949	G	C	Prupe.1G022000	MODIFIER	upstream_gene_variant	.	protein_coding
1515949	G	C	Prupe.1G022200	MODIFIER	downstream_gene_variant	.	protein_coding
1515986	T	C	Prupe.1G022100	MODERATE	missense_variant	p.Thr435Ala	protein_coding
1515986	T	C	Prupe.1G021900	MODIFIER	upstream_gene_variant	.	protein_coding
1515986	T	C	Prupe.1G022000	MODIFIER	upstream_gene_variant	.	protein_coding
1515986	T	C	Prupe.1G022200	MODIFIER	downstream_gene_variant	.	protein_coding
1515999	C	T	Prupe.1G022100	LOW	synonymous_variant	p.Glu430Glu	protein_coding
1515999	C	T	Prupe.1G021900	MODIFIER	upstream_gene_variant	.	protein_coding
1515999	C	T	Prupe.1G022000	MODIFIER	upstream_gene_variant	.	protein_coding
1515999	C	T	Prupe.1G022200	MODIFIER	downstream_gene_variant	.	protein_coding
1518452	T	A	Prupe.1G022200	MODERATE	missense_variant	p.Asn253Ile	protein_coding
1518452	T	A	Prupe.1G022200	MODERATE	missense_variant	p.Asn186Ile	protein_coding
1518452	T	A	Prupe.1G022000	MODIFIER	upstream_gene_variant	.	protein_coding
1518452	T	A	Prupe.1G022100	MODIFIER	upstream_gene_variant	.	protein_coding
1518452	T	A	Prupe.1G022300	MODIFIER	upstream_gene_variant	.	protein_coding
1518469	A	G	Prupe.1G022200	LOW	synonymous_variant	p.Leu247Leu	protein_coding
1518469	A	G	Prupe.1G022200	LOW	synonymous_variant	p.Leu180Leu	protein_coding
1518469	A	G	Prupe.1G022000	MODIFIER	upstream_gene_variant	.	protein_coding
1518469	A	G	Prupe.1G022100	MODIFIER	upstream_gene_variant	.	protein_coding
1518469	A	G	Prupe.1G022300	MODIFIER	upstream_gene_variant	.	protein_coding
1518472	T	A	Prupe.1G022200	LOW	synonymous_variant	p.Leu246Leu	protein_coding
1518472	T	A	Prupe.1G022200	LOW	synonymous_variant	p.Leu179Leu	protein_coding
1518472	T	A	Prupe.1G022000	MODIFIER	upstream_gene_variant	.	protein_coding
1518472	T	A	Prupe.1G022100	MODIFIER	upstream_gene_variant	.	protein_coding
1518472	T	A	Prupe.1G022300	MODIFIER	upstream_gene_variant	.	protein_coding
1518656	T	A	Prupe.1G022000	MODIFIER	upstream_gene_variant	.	protein_coding
1518656	T	A	Prupe.1G022100	MODIFIER	upstream_gene_variant	.	protein_coding
1518656	T	A	Prupe.1G022300	MODIFIER	upstream_gene_variant	.	protein_coding
1518656	T	A	Prupe.1G022200	MODIFIER	intron_variant	.	protein_coding
1518656	T	A	Prupe.1G022200	MODIFIER	intron_variant	.	protein_coding
1568677	T	C	Prupe.1G022800	MODIFIER	downstream_gene_variant	.	protein_coding
1568677	T	C	Prupe.1G022900	MODIFIER	intron_variant	.	protein_coding
1573260	C	T	Prupe.1G022900	MODERATE	missense_variant	p.Arg190Lys	protein_coding
1573260	C	T	Prupe.1G022900	MODERATE	missense_variant	p.Arg9Lys	protein_coding
1593416	T	A	Prupe.1G023100	MODERATE	missense_variant	p.Ile629Leu	protein_coding
1593416	T	A	Prupe.1G023000	MODIFIER	downstream_gene_variant	.	protein_coding
1593416	T	A	Prupe.1G023200	MODIFIER	downstream_gene_variant	.	protein_coding
1593492	C	G	Prupe.1G023100	LOW	synonymous_variant	p.Gly603Gly	protein_coding
1593492	C	G	Prupe.1G023000	MODIFIER	downstream_gene_variant	.	protein_coding
1593492	C	G	Prupe.1G023200	MODIFIER	downstream_gene_variant	.	protein_coding
1593506	G	T	Prupe.1G023100	MODERATE	missense_variant	p.Gln599Lys	protein_coding
1593506	G	T	Prupe.1G023000	MODIFIER	downstream_gene_variant	.	protein_coding
1593506	G	T	Prupe.1G023200	MODIFIER	downstream_gene_variant	.	protein_coding
1593542	G	T	Prupe.1G023100	MODERATE	missense_variant	p.Gln587Lys	protein_coding
1593542	G	T	Prupe.1G023000	MODIFIER	downstream_gene_variant	.	protein_coding
1593542	G	T	Prupe.1G023200	MODIFIER	downstream_gene_variant	.	protein_coding
1593614	C	A	Prupe.1G023100	MODERATE	missense_variant	p.Val563Leu	protein_coding
1593614	C	A	Prupe.1G023000	MODIFIER	downstream_gene_variant	.	protein_coding
1593614	C	A	Prupe.1G023200	MODIFIER	downstream_gene_variant	.	protein_coding
1593930	T	C	Prupe.1G023100	LOW	synonymous_variant	p.Thr457Thr	protein_coding
1593930	T	C	Prupe.1G023000	MODIFIER	downstream_gene_variant	.	protein_coding
1593930	T	C	Prupe.1G023200	MODIFIER	downstream_gene_variant	.	protein_coding
1611631	C	T	Prupe.1G023300	LOW	synonymous_variant	p.Lys812Lys	protein_coding
1611654	T	A	Prupe.1G023300	MODERATE	missense_variant	p.Ser805Cys	protein_coding
1611846	T	G	Prupe.1G023300	MODERATE	missense_variant	p.Lys741Gln	protein_coding
1656101	A	T	Prupe.1G023500	MODERATE	missense_variant	p.Lys50Ile	protein_coding
1656101	A	T	Prupe.1G023500	MODERATE	missense_variant	p.Lys50Ile	protein_coding
1656101	A	T	Prupe.1G023600	MODIFIER	downstream_gene_variant	.	protein_coding
1656148	G	A	Prupe.1G023500	MODERATE	missense_variant	p.Gly66Arg	protein_coding
1656148	G	A	Prupe.1G023500	MODERATE	missense_variant	p.Gly66Arg	protein_coding
1656148	G	A	Prupe.1G023600	MODIFIER	downstream_gene_variant	.	protein_coding
1656277	A	G	Prupe.1G023600	MODIFIER	downstream_gene_variant	.	protein_coding
1656277	A	G	Prupe.1G023500	MODIFIER	intron_variant	.	protein_coding
1656277	A	G	Prupe.1G023500	MODIFIER	intron_variant	.	protein_coding
1705366	C	T	Prupe.1G024800	LOW	synonymous_variant	p.Val385Val	protein_coding
1705366	C	T	Prupe.1G024600	MODIFIER	downstream_gene_variant	.	protein_coding
1705366	C	T	Prupe.1G024700	MODIFIER	downstream_gene_variant	.	protein_coding
1705394	C	T	Prupe.1G024800	MODIFIER	3_prime_UTR_variant	.	protein_coding
1705394	C	T	Prupe.1G024600	MODIFIER	downstream_gene_variant	.	protein_coding
1705394	C	T	Prupe.1G024700	MODIFIER	downstream_gene_variant	.	protein_coding
1705504	C	T	Prupe.1G024800	MODIFIER	3_prime_UTR_variant	.	protein_coding
1705504	C	T	Prupe.1G024600	MODIFIER	downstream_gene_variant	.	protein_coding
1705504	C	T	Prupe.1G024700	MODIFIER	downstream_gene_variant	.	protein_coding
1705558	T	C	Prupe.1G024800	MODIFIER	3_prime_UTR_variant	.	protein_coding
1705558	T	C	Prupe.1G024600	MODIFIER	downstream_gene_variant	.	protein_coding
1705558	T	C	Prupe.1G024700	MODIFIER	downstream_gene_variant	.	protein_coding
1705563	A	G	Prupe.1G024800	MODIFIER	3_prime_UTR_variant	.	protein_coding
1705563	A	G	Prupe.1G024600	MODIFIER	downstream_gene_variant	.	protein_coding
1705563	A	G	Prupe.1G024700	MODIFIER	downstream_gene_variant	.	protein_coding
1705599	A	T	Prupe.1G024800	MODIFIER	3_prime_UTR_variant	.	protein_coding
1705599	A	T	Prupe.1G024600	MODIFIER	downstream_gene_variant	.	protein_coding
1705599	A	T	Prupe.1G024700	MODIFIER	downstream_gene_variant	.	protein_coding
1744403	A	T	Prupe.1G025100	MODIFIER	upstream_gene_variant	.	protein_coding
1744403	A	T	Prupe.1G025300	MODIFIER	downstream_gene_variant	.	protein_coding
1744403	A	T	Prupe.1G025200	MODIFIER	intron_variant	.	protein_coding
1744403	A	T	Prupe.1G025200	MODIFIER	intron_variant	.	protein_coding
1744434	C	A	Prupe.1G025100	MODIFIER	upstream_gene_variant	.	protein_coding
1744434	C	A	Prupe.1G025300	MODIFIER	downstream_gene_variant	.	protein_coding
1744434	C	A	Prupe.1G025200	MODIFIER	intron_variant	.	protein_coding
1744434	C	A	Prupe.1G025200	MODIFIER	intron_variant	.	protein_coding
1761296	G	T	Prupe.1G025600	MODIFIER	downstream_gene_variant	.	protein_coding
1761296	G	T	Prupe.1G025500	MODIFIER	intron_variant	.	protein_coding
1761603	A	G	Prupe.1G025500	LOW	synonymous_variant	p.Ala459Ala	protein_coding
1761603	A	G	Prupe.1G025600	MODIFIER	downstream_gene_variant	.	protein_coding
1777852	C	T	Prupe.1G025700	MODERATE	missense_variant	p.Arg806His	protein_coding
1839627	C	T	Prupe.1G026400	LOW	synonymous_variant	p.Leu155Leu	protein_coding
1839627	C	T	Prupe.1G026500	MODIFIER	downstream_gene_variant	.	protein_coding
1907318	T	G	Prupe.1G027200	MODIFIER	downstream_gene_variant	.	protein_coding
1907318	T	G	Prupe.1G027300	MODIFIER	intron_variant	.	protein_coding
1907318	T	G	Prupe.1G027300	MODIFIER	intron_variant	.	protein_coding
1907337	T	G	Prupe.1G027200	MODIFIER	downstream_gene_variant	.	protein_coding
1907337	T	G	Prupe.1G027300	MODIFIER	intron_variant	.	protein_coding
1907337	T	G	Prupe.1G027300	MODIFIER	intron_variant	.	protein_coding
1907499	C	A	Prupe.1G027200	MODIFIER	downstream_gene_variant	.	protein_coding
1907499	C	A	Prupe.1G027300	MODIFIER	intron_variant	.	protein_coding
1907499	C	A	Prupe.1G027300	MODIFIER	intron_variant	.	protein_coding
1907511	A	G	Prupe.1G027200	MODIFIER	downstream_gene_variant	.	protein_coding
1907511	A	G	Prupe.1G027300	MODIFIER	intron_variant	.	protein_coding
1907511	A	G	Prupe.1G027300	MODIFIER	intron_variant	.	protein_coding
1949782	A	G	Prupe.1G027800	MODIFIER	intron_variant	.	protein_coding
1956834	C	T	Prupe.1G027900	MODERATE	missense_variant	p.Ser305Phe	protein_coding
1956834	C	T	Prupe.1G027800	MODIFIER	downstream_gene_variant	.	protein_coding
1956980	C	T	Prupe.1G027900	MODERATE	missense_variant	p.Arg354Cys	protein_coding
1956980	C	T	Prupe.1G027800	MODIFIER	downstream_gene_variant	.	protein_coding
1967809	T	C	Prupe.1G028000	MODERATE	missense_variant	p.Met473Thr	protein_coding
1967809	T	C	Prupe.1G028000	MODERATE	missense_variant	p.Met462Thr	protein_coding
1967809	T	C	Prupe.1G028000	MODERATE	missense_variant	p.Met337Thr	protein_coding
1967809	T	C	Prupe.1G028000	MODERATE	missense_variant	p.Met337Thr	protein_coding
1967809	T	C	Prupe.1G028200	MODIFIER	upstream_gene_variant	.	protein_coding
1967809	T	C	Prupe.1G028100	MODIFIER	downstream_gene_variant	.	protein_coding
2271574	A	C	Prupe.1G032300	MODERATE	missense_variant	p.Leu84Phe	protein_coding
2271574	A	C	Prupe.1G032400	MODIFIER	upstream_gene_variant	.	protein_coding
2271574	A	C	Prupe.1G032500	MODIFIER	upstream_gene_variant	.	protein_coding
2271574	A	C	Prupe.1G032600	MODIFIER	downstream_gene_variant	.	protein_coding
2271663	C	G	Prupe.1G032300	MODERATE	missense_variant	p.Pro114Arg	protein_coding
2271663	C	G	Prupe.1G032400	MODIFIER	upstream_gene_variant	.	protein_coding
2271663	C	G	Prupe.1G032500	MODIFIER	upstream_gene_variant	.	protein_coding
2271663	C	G	Prupe.1G032600	MODIFIER	downstream_gene_variant	.	protein_coding
2271747	T	G	Prupe.1G032300	MODERATE	missense_variant	p.Phe142Cys	protein_coding
2271747	T	G	Prupe.1G032400	MODIFIER	upstream_gene_variant	.	protein_coding
2271747	T	G	Prupe.1G032500	MODIFIER	upstream_gene_variant	.	protein_coding
2271747	T	G	Prupe.1G032600	MODIFIER	downstream_gene_variant	.	protein_coding
2272217	C	T	Prupe.1G032300	MODERATE	missense_variant	p.His299Tyr	protein_coding
2272217	C	T	Prupe.1G032400	MODIFIER	upstream_gene_variant	.	protein_coding
2272217	C	T	Prupe.1G032500	MODIFIER	upstream_gene_variant	.	protein_coding
2272217	C	T	Prupe.1G032600	MODIFIER	downstream_gene_variant	.	protein_coding
2272324	G	C	Prupe.1G032300	LOW	synonymous_variant	p.Leu334Leu	protein_coding
2272324	G	C	Prupe.1G032400	MODIFIER	upstream_gene_variant	.	protein_coding
2272324	G	C	Prupe.1G032500	MODIFIER	upstream_gene_variant	.	protein_coding
2272324	G	C	Prupe.1G032600	MODIFIER	downstream_gene_variant	.	protein_coding
2290273	G	A	Prupe.1G032900	MODIFIER	5_prime_UTR_variant	.	protein_coding
2290273	G	A	Prupe.1G033000	MODIFIER	upstream_gene_variant	.	protein_coding
2302095	T	C	Prupe.1G033200	LOW	synonymous_variant	p.Ala833Ala	protein_coding
2302095	T	C	Prupe.1G033200	LOW	synonymous_variant	p.Ala825Ala	protein_coding
2302095	T	C	Prupe.1G033100	MODIFIER	upstream_gene_variant	.	protein_coding
2302095	T	C	Prupe.1G033300	MODIFIER	upstream_gene_variant	.	protein_coding
2302194	A	G	Prupe.1G033200	LOW	synonymous_variant	p.Ser800Ser	protein_coding
2302194	A	G	Prupe.1G033200	LOW	synonymous_variant	p.Ser792Ser	protein_coding
2302194	A	G	Prupe.1G033100	MODIFIER	upstream_gene_variant	.	protein_coding
2302194	A	G	Prupe.1G033300	MODIFIER	upstream_gene_variant	.	protein_coding
2318800	G	A	Prupe.1G033400	MODIFIER	upstream_gene_variant	.	protein_coding
2318800	G	A	Prupe.1G033400-Prupe.1G033500	MODIFIER	intergenic_region	.	.
2318806	G	C	Prupe.1G033400	MODIFIER	upstream_gene_variant	.	protein_coding
2318806	G	C	Prupe.1G033400-Prupe.1G033500	MODIFIER	intergenic_region	.	.
2318833	G	A	Prupe.1G033400	MODIFIER	upstream_gene_variant	.	protein_coding
2318833	G	A	Prupe.1G033400-Prupe.1G033500	MODIFIER	intergenic_region	.	.
2318839	T	C	Prupe.1G033400	MODIFIER	upstream_gene_variant	.	protein_coding
2318839	T	C	Prupe.1G033400-Prupe.1G033500	MODIFIER	intergenic_region	.	.
2318840	G	A	Prupe.1G033400	MODIFIER	upstream_gene_variant	.	protein_coding
2318840	G	A	Prupe.1G033400-Prupe.1G033500	MODIFIER	intergenic_region	.	.
2318870	A	C	Prupe.1G033400	MODIFIER	upstream_gene_variant	.	protein_coding
2318870	A	C	Prupe.1G033400-Prupe.1G033500	MODIFIER	intergenic_region	.	.
2318875	A	C	Prupe.1G033400	MODIFIER	upstream_gene_variant	.	protein_coding
2318875	A	C	Prupe.1G033400-Prupe.1G033500	MODIFIER	intergenic_region	.	.
2318936	A	G	Prupe.1G033400	MODIFIER	upstream_gene_variant	.	protein_coding
2318936	A	G	Prupe.1G033400-Prupe.1G033500	MODIFIER	intergenic_region	.	.
2318938	A	G	Prupe.1G033400	MODIFIER	upstream_gene_variant	.	protein_coding
2318938	A	G	Prupe.1G033400-Prupe.1G033500	MODIFIER	intergenic_region	.	.
2318986	T	C	Prupe.1G033400	MODIFIER	upstream_gene_variant	.	protein_coding
2318986	T	C	Prupe.1G033400-Prupe.1G033500	MODIFIER	intergenic_region	.	.
2318987	G	A	Prupe.1G033400	MODIFIER	upstream_gene_variant	.	protein_coding
2318987	G	A	Prupe.1G033400-Prupe.1G033500	MODIFIER	intergenic_region	.	.
2318995	A	G	Prupe.1G033400	MODIFIER	upstream_gene_variant	.	protein_coding
2318995	A	G	Prupe.1G033400-Prupe.1G033500	MODIFIER	intergenic_region	.	.
2319017	T	G	Prupe.1G033400	MODIFIER	upstream_gene_variant	.	protein_coding
2319017	T	G	Prupe.1G033400-Prupe.1G033500	MODIFIER	intergenic_region	.	.
2343326	A	G	Prupe.1G033700	MODERATE	missense_variant	p.Asn144Asp	protein_coding
2343326	A	G	Prupe.1G033700	MODIFIER	5_prime_UTR_variant	.	protein_coding
2343326	A	G	Prupe.1G033600	MODIFIER	downstream_gene_variant	.	protein_coding
2343382	C	G	Prupe.1G033700	LOW	synonymous_variant	p.Val162Val	protein_coding
2343382	C	G	Prupe.1G033700	MODIFIER	5_prime_UTR_variant	.	protein_coding
2343382	C	G	Prupe.1G033600	MODIFIER	downstream_gene_variant	.	protein_coding
2446666	A	G	Prupe.1G034900	LOW	synonymous_variant	p.Gln81Gln	protein_coding
2446666	A	G	Prupe.1G034800	MODIFIER	upstream_gene_variant	.	protein_coding
2446666	A	G	Prupe.1G035000	MODIFIER	downstream_gene_variant	.	protein_coding
2475591	A	G	Prupe.1G035400	MODERATE	missense_variant	p.Ile292Val	protein_coding
2475591	A	G	Prupe.1G035500	MODIFIER	upstream_gene_variant	.	protein_coding
2475742	A	T	Prupe.1G035500	MODIFIER	upstream_gene_variant	.	protein_coding
2475742	A	T	Prupe.1G035400	MODIFIER	intron_variant	.	protein_coding
2475743	T	G	Prupe.1G035500	MODIFIER	upstream_gene_variant	.	protein_coding
2475743	T	G	Prupe.1G035400	MODIFIER	intron_variant	.	protein_coding
2547697	C	T	Prupe.1G036500	LOW	synonymous_variant	p.His198His	protein_coding
2547697	C	T	Prupe.1G036400	MODIFIER	downstream_gene_variant	.	protein_coding
2572166	A	G	Prupe.1G037000	MODIFIER	upstream_gene_variant	.	protein_coding
2572166	A	G	Prupe.1G036900	MODIFIER	upstream_gene_variant	.	protein_coding
2572166	A	G	Prupe.1G036900	MODIFIER	downstream_gene_variant	.	protein_coding
2572166	A	G	Prupe.1G036900	MODIFIER	intron_variant	.	protein_coding
2572166	A	G	Prupe.1G036900	MODIFIER	intron_variant	.	protein_coding
2572170	T	C	Prupe.1G037000	MODIFIER	upstream_gene_variant	.	protein_coding
2572170	T	C	Prupe.1G036900	MODIFIER	upstream_gene_variant	.	protein_coding
2572170	T	C	Prupe.1G036900	MODIFIER	downstream_gene_variant	.	protein_coding
2572170	T	C	Prupe.1G036900	MODIFIER	intron_variant	.	protein_coding
2572170	T	C	Prupe.1G036900	MODIFIER	intron_variant	.	protein_coding
2734685	G	A	Prupe.1G038700	LOW	synonymous_variant	p.Arg99Arg	protein_coding
2735475	T	C	Prupe.1G038700	MODERATE	missense_variant	p.Phe363Leu	protein_coding
2735508	C	A	Prupe.1G038700	MODERATE	missense_variant	p.Leu374Ile	protein_coding
2743960	T	C	Prupe.1G038800	MODERATE	missense_variant	p.Thr114Ala	protein_coding
2743960	T	C	Prupe.1G038900	MODIFIER	downstream_gene_variant	.	protein_coding
2743985	G	T	Prupe.1G038800	LOW	synonymous_variant	p.Ser105Ser	protein_coding
2743985	G	T	Prupe.1G038900	MODIFIER	downstream_gene_variant	.	protein_coding
2826567	G	A	Prupe.1G039600	MODERATE	missense_variant	p.His97Tyr	protein_coding
2826567	G	A	Prupe.1G039700	MODIFIER	upstream_gene_variant	.	protein_coding
2826567	G	A	Prupe.1G039500	MODIFIER	downstream_gene_variant	.	protein_coding
2826756	T	G	Prupe.1G039600	MODERATE	missense_variant	p.Lys34Gln	protein_coding
2826756	T	G	Prupe.1G039700	MODIFIER	upstream_gene_variant	.	protein_coding
2826756	T	G	Prupe.1G039500	MODIFIER	downstream_gene_variant	.	protein_coding
2826781	G	C	Prupe.1G039600	LOW	synonymous_variant	p.Ser25Ser	protein_coding
2826781	G	C	Prupe.1G039700	MODIFIER	upstream_gene_variant	.	protein_coding
2826781	G	C	Prupe.1G039500	MODIFIER	downstream_gene_variant	.	protein_coding
2826783	A	C	Prupe.1G039600	MODERATE	missense_variant	p.Ser25Ala	protein_coding
2826783	A	C	Prupe.1G039700	MODIFIER	upstream_gene_variant	.	protein_coding
2826783	A	C	Prupe.1G039500	MODIFIER	downstream_gene_variant	.	protein_coding
2829342	C	A	Prupe.1G039700	MODERATE	missense_variant	p.Ser27Arg	protein_coding
2829342	C	A	Prupe.1G039600	MODIFIER	upstream_gene_variant	.	protein_coding
2829342	C	A	Prupe.1G039500	MODIFIER	downstream_gene_variant	.	protein_coding
2829342	C	A	Prupe.1G039700	MODIFIER	intron_variant	.	protein_coding
2829368	C	T	Prupe.1G039700	MODERATE	missense_variant	p.Ala36Val	protein_coding
2829368	C	T	Prupe.1G039600	MODIFIER	upstream_gene_variant	.	protein_coding
2829368	C	T	Prupe.1G039500	MODIFIER	downstream_gene_variant	.	protein_coding
2829368	C	T	Prupe.1G039700	MODIFIER	intron_variant	.	protein_coding
2829376	A	G	Prupe.1G039700	MODERATE	missense_variant	p.Thr39Ala	protein_coding
2829376	A	G	Prupe.1G039600	MODIFIER	upstream_gene_variant	.	protein_coding
2829376	A	G	Prupe.1G039500	MODIFIER	downstream_gene_variant	.	protein_coding
2829376	A	G	Prupe.1G039700	MODIFIER	intron_variant	.	protein_coding
2829384	A	T	Prupe.1G039700	MODERATE	missense_variant	p.Lys41Asn	protein_coding
2829384	A	T	Prupe.1G039600	MODIFIER	upstream_gene_variant	.	protein_coding
2829384	A	T	Prupe.1G039500	MODIFIER	downstream_gene_variant	.	protein_coding
2829384	A	T	Prupe.1G039700	MODIFIER	intron_variant	.	protein_coding
2829396	C	T	Prupe.1G039700	LOW	synonymous_variant	p.Asp45Asp	protein_coding
2829396	C	T	Prupe.1G039600	MODIFIER	upstream_gene_variant	.	protein_coding
2829396	C	T	Prupe.1G039500	MODIFIER	downstream_gene_variant	.	protein_coding
2829396	C	T	Prupe.1G039700	MODIFIER	intron_variant	.	protein_coding
2844044	T	C	Prupe.1G040000	LOW	synonymous_variant	p.Ser29Ser	protein_coding
2844044	T	C	Prupe.1G040100	MODIFIER	upstream_gene_variant	.	protein_coding
2844044	T	C	Prupe.1G039900	MODIFIER	downstream_gene_variant	.	protein_coding
2844053	A	G	Prupe.1G040000	LOW	synonymous_variant	p.Arg32Arg	protein_coding
2844053	A	G	Prupe.1G040100	MODIFIER	upstream_gene_variant	.	protein_coding
2844053	A	G	Prupe.1G039900	MODIFIER	downstream_gene_variant	.	protein_coding
2844072	A	G	Prupe.1G040000	MODERATE	missense_variant	p.Thr39Ala	protein_coding
2844072	A	G	Prupe.1G040100	MODIFIER	upstream_gene_variant	.	protein_coding
2844072	A	G	Prupe.1G039900	MODIFIER	downstream_gene_variant	.	protein_coding
2844074	T	C	Prupe.1G040000	LOW	synonymous_variant	p.Thr39Thr	protein_coding
2844074	T	C	Prupe.1G040100	MODIFIER	upstream_gene_variant	.	protein_coding
2844074	T	C	Prupe.1G039900	MODIFIER	downstream_gene_variant	.	protein_coding
2844092	C	T	Prupe.1G040000	LOW	synonymous_variant	p.Asp45Asp	protein_coding
2844092	C	T	Prupe.1G040100	MODIFIER	upstream_gene_variant	.	protein_coding
2844092	C	T	Prupe.1G039900	MODIFIER	downstream_gene_variant	.	protein_coding
2852851	C	T	Prupe.1G040100	LOW	synonymous_variant	p.His569His	protein_coding
2852851	C	T	Prupe.1G040100	LOW	synonymous_variant	p.His540His	protein_coding
2852851	C	T	Prupe.1G040200	MODIFIER	upstream_gene_variant	.	protein_coding
2852851	C	T	Prupe.1G040000	MODIFIER	downstream_gene_variant	.	protein_coding
2861053	G	A	Prupe.1G040200	LOW	synonymous_variant	p.Glu300Glu	protein_coding
2861053	G	A	Prupe.1G040200	LOW	synonymous_variant	p.Glu275Glu	protein_coding
2861124	C	T	Prupe.1G040200	MODERATE	missense_variant	p.Pro324Leu	protein_coding
2861124	C	T	Prupe.1G040200	MODERATE	missense_variant	p.Pro299Leu	protein_coding
2861416	T	G	Prupe.1G040200	MODERATE	missense_variant	p.Ser421Arg	protein_coding
2861416	T	G	Prupe.1G040200	MODERATE	missense_variant	p.Ser396Arg	protein_coding
2918924	A	T	Prupe.1G040700	MODIFIER	intron_variant	.	protein_coding
2918924	A	T	Prupe.1G040700	MODIFIER	intron_variant	.	protein_coding
2918924	A	T	Prupe.1G040700	MODIFIER	intron_variant	.	protein_coding
2919125	T	A	Prupe.1G040700	MODIFIER	intron_variant	.	protein_coding
2919125	T	A	Prupe.1G040700	MODIFIER	intron_variant	.	protein_coding
2919125	T	A	Prupe.1G040700	MODIFIER	intron_variant	.	protein_coding
2920005	A	C	Prupe.1G040700	MODERATE	missense_variant	p.Thr437Pro	protein_coding
2920005	A	C	Prupe.1G040700	MODERATE	missense_variant	p.Thr436Pro	protein_coding
2920005	A	C	Prupe.1G040700	MODERATE	missense_variant	p.Thr430Pro	protein_coding
2920005	A	C	Prupe.1G040700	MODIFIER	intron_variant	.	protein_coding
2920064	T	C	Prupe.1G040700	LOW	synonymous_variant	p.Ile456Ile	protein_coding
2920064	T	C	Prupe.1G040700	LOW	synonymous_variant	p.Ile455Ile	protein_coding
2920064	T	C	Prupe.1G040700	LOW	synonymous_variant	p.Ile449Ile	protein_coding
2920064	T	C	Prupe.1G040700	MODIFIER	intron_variant	.	protein_coding
3031119	G	A	Prupe.1G042400	MODERATE	missense_variant	p.Arg298Lys	protein_coding
3031119	G	A	Prupe.1G042500	MODIFIER	downstream_gene_variant	.	protein_coding
3031300	T	A	Prupe.1G042400	LOW	synonymous_variant	p.Gly358Gly	protein_coding
3031300	T	A	Prupe.1G042500	MODIFIER	downstream_gene_variant	.	protein_coding
3203584	C	G	Prupe.1G044800	LOW	synonymous_variant	p.Leu336Leu	protein_coding
3203584	C	G	Prupe.1G044700	MODIFIER	downstream_gene_variant	.	protein_coding
3203614	A	G	Prupe.1G044800	MODERATE	missense_variant	p.Ile346Met	protein_coding
3203614	A	G	Prupe.1G044700	MODIFIER	downstream_gene_variant	.	protein_coding
3203626	C	T	Prupe.1G044800	LOW	synonymous_variant	p.Ile350Ile	protein_coding
3203626	C	T	Prupe.1G044700	MODIFIER	downstream_gene_variant	.	protein_coding
3203938	G	A	Prupe.1G044700	MODIFIER	downstream_gene_variant	.	protein_coding
3203938	G	A	Prupe.1G044800	MODIFIER	intron_variant	.	protein_coding
3252963	C	T	Prupe.1G045600	LOW	synonymous_variant	p.Ser275Ser	protein_coding
3252963	C	T	Prupe.1G045700	MODIFIER	downstream_gene_variant	.	protein_coding
3253327	T	G	Prupe.1G045600	LOW	synonymous_variant	p.Ala366Ala	protein_coding
3253327	T	G	Prupe.1G045700	MODIFIER	3_prime_UTR_variant	.	protein_coding
3256349	C	T	Prupe.1G045700	LOW	synonymous_variant	p.Lys526Lys	protein_coding
3256349	C	T	Prupe.1G045800	MODIFIER	upstream_gene_variant	.	protein_coding
3256349	C	T	Prupe.1G045600	MODIFIER	downstream_gene_variant	.	protein_coding
3256636	C	A	Prupe.1G045800	MODIFIER	upstream_gene_variant	.	protein_coding
3256636	C	A	Prupe.1G045600	MODIFIER	downstream_gene_variant	.	protein_coding
3256636	C	A	Prupe.1G045700	MODIFIER	intron_variant	.	protein_coding
3256695	A	G	Prupe.1G045700	LOW	synonymous_variant	p.Asn490Asn	protein_coding
3256695	A	G	Prupe.1G045800	MODIFIER	upstream_gene_variant	.	protein_coding
3256695	A	G	Prupe.1G045600	MODIFIER	downstream_gene_variant	.	protein_coding
3256707	A	G	Prupe.1G045700	LOW	synonymous_variant	p.Ser486Ser	protein_coding
3256707	A	G	Prupe.1G045800	MODIFIER	upstream_gene_variant	.	protein_coding
3256707	A	G	Prupe.1G045600	MODIFIER	downstream_gene_variant	.	protein_coding
3269935	T	C	Prupe.1G045900	MODIFIER	downstream_gene_variant	.	protein_coding
3269935	T	C	Prupe.1G045800	MODIFIER	intron_variant	.	protein_coding
3319910	T	C	Prupe.1G046900	LOW	5_prime_UTR_premature_start_codon_gain_variant	.	protein_coding
3319910	T	C	Prupe.1G046900	MODIFIER	5_prime_UTR_variant	.	protein_coding
3319910	T	C	Prupe.1G046800	MODIFIER	downstream_gene_variant	.	protein_coding
3319910	T	C	Prupe.1G047000	MODIFIER	downstream_gene_variant	.	protein_coding
3319991	T	C	Prupe.1G046900	MODIFIER	upstream_gene_variant	.	protein_coding
3319991	T	C	Prupe.1G046800	MODIFIER	downstream_gene_variant	.	protein_coding
3319991	T	C	Prupe.1G047000	MODIFIER	downstream_gene_variant	.	protein_coding
3319991	T	C	Prupe.1G046900-Prupe.1G047000	MODIFIER	intergenic_region	.	.
3320216	T	G	Prupe.1G047000	MODIFIER	3_prime_UTR_variant	.	protein_coding
3320216	T	G	Prupe.1G046900	MODIFIER	upstream_gene_variant	.	protein_coding
3320216	T	G	Prupe.1G046800	MODIFIER	downstream_gene_variant	.	protein_coding
3341479	T	A	Prupe.1G047300	MODERATE	missense_variant	p.Leu215Phe	protein_coding
3341479	T	A	Prupe.1G047100	MODIFIER	upstream_gene_variant	.	protein_coding
3341479	T	A	Prupe.1G047200	MODIFIER	upstream_gene_variant	.	protein_coding
3341574	C	T	Prupe.1G047300	MODERATE	missense_variant	p.Gly184Ser	protein_coding
3341574	C	T	Prupe.1G047100	MODIFIER	upstream_gene_variant	.	protein_coding
3341574	C	T	Prupe.1G047200	MODIFIER	upstream_gene_variant	.	protein_coding
3341617	T	C	Prupe.1G047300	LOW	synonymous_variant	p.Val169Val	protein_coding
3341617	T	C	Prupe.1G047100	MODIFIER	upstream_gene_variant	.	protein_coding
3341617	T	C	Prupe.1G047200	MODIFIER	upstream_gene_variant	.	protein_coding
3363606	T	C	Prupe.1G047500	MODIFIER	3_prime_UTR_variant	.	protein_coding
3363606	T	C	Prupe.1G047600	MODIFIER	downstream_gene_variant	.	protein_coding
3363626	T	C	Prupe.1G047500	MODIFIER	3_prime_UTR_variant	.	protein_coding
3363626	T	C	Prupe.1G047600	MODIFIER	downstream_gene_variant	.	protein_coding
3363659	G	A	Prupe.1G047500	MODIFIER	3_prime_UTR_variant	.	protein_coding
3363659	G	A	Prupe.1G047600	MODIFIER	downstream_gene_variant	.	protein_coding
3400901	T	C	Prupe.1G048100	MODERATE	missense_variant	p.Val351Ala	protein_coding
3400901	T	C	Prupe.1G048000	MODIFIER	downstream_gene_variant	.	protein_coding
3400901	T	C	Prupe.1G048200	MODIFIER	downstream_gene_variant	.	protein_coding
3400905	G	A	Prupe.1G048100	LOW	synonymous_variant	p.Val352Val	protein_coding
3400905	G	A	Prupe.1G048000	MODIFIER	downstream_gene_variant	.	protein_coding
3400905	G	A	Prupe.1G048200	MODIFIER	downstream_gene_variant	.	protein_coding
3400926	G	A	Prupe.1G048100	LOW	synonymous_variant	p.Gly359Gly	protein_coding
3400926	G	A	Prupe.1G048000	MODIFIER	downstream_gene_variant	.	protein_coding
3400926	G	A	Prupe.1G048200	MODIFIER	downstream_gene_variant	.	protein_coding
3404019	T	C	Prupe.1G048200	MODERATE	missense_variant	p.Ile449Val	protein_coding
3404019	T	C	Prupe.1G048100	MODIFIER	downstream_gene_variant	.	protein_coding
3404019	T	C	Prupe.1G048300	MODIFIER	downstream_gene_variant	.	protein_coding
3404059	T	C	Prupe.1G048200	LOW	synonymous_variant	p.Gln435Gln	protein_coding
3404059	T	C	Prupe.1G048100	MODIFIER	downstream_gene_variant	.	protein_coding
3404059	T	C	Prupe.1G048300	MODIFIER	downstream_gene_variant	.	protein_coding
3404356	A	T	Prupe.1G048200	LOW	synonymous_variant	p.Ala336Ala	protein_coding
3404356	A	T	Prupe.1G048100	MODIFIER	downstream_gene_variant	.	protein_coding
3404356	A	T	Prupe.1G048300	MODIFIER	downstream_gene_variant	.	protein_coding
3431774	C	A	Prupe.1G048800	MODERATE	missense_variant	p.Ser12Tyr	protein_coding
3431774	C	A	Prupe.1G048700	MODIFIER	upstream_gene_variant	.	protein_coding
3431774	C	A	Prupe.1G048900	MODIFIER	upstream_gene_variant	.	protein_coding
3431774	C	A	Prupe.1G048600	MODIFIER	downstream_gene_variant	.	protein_coding
3431787	T	C	Prupe.1G048800	LOW	synonymous_variant	p.Ser16Ser	protein_coding
3431787	T	C	Prupe.1G048700	MODIFIER	upstream_gene_variant	.	protein_coding
3431787	T	C	Prupe.1G048900	MODIFIER	upstream_gene_variant	.	protein_coding
3431787	T	C	Prupe.1G048600	MODIFIER	downstream_gene_variant	.	protein_coding
3458095	G	A	Prupe.1G049200	MODERATE	missense_variant	p.Ala126Thr	protein_coding
3464642	A	G	Prupe.1G049200	MODIFIER	downstream_gene_variant	.	protein_coding
3464642	A	G	Prupe.1G049300	MODIFIER	intron_variant	.	protein_coding
3464646	G	A	Prupe.1G049200	MODIFIER	downstream_gene_variant	.	protein_coding
3464646	G	A	Prupe.1G049300	MODIFIER	intron_variant	.	protein_coding
3464675	A	T	Prupe.1G049200	MODIFIER	downstream_gene_variant	.	protein_coding
3464675	A	T	Prupe.1G049300	MODIFIER	intron_variant	.	protein_coding
3464884	A	G	Prupe.1G049200	MODIFIER	downstream_gene_variant	.	protein_coding
3464884	A	G	Prupe.1G049300	MODIFIER	intron_variant	.	protein_coding
3464933	T	C	Prupe.1G049300	LOW	synonymous_variant	p.Leu392Leu	protein_coding
3464933	T	C	Prupe.1G049200	MODIFIER	downstream_gene_variant	.	protein_coding
3464939	A	C	Prupe.1G049300	LOW	synonymous_variant	p.Val390Val	protein_coding
3464939	A	C	Prupe.1G049200	MODIFIER	downstream_gene_variant	.	protein_coding
3487024	G	A	Prupe.1G049600	MODERATE	missense_variant	p.Val19Met	protein_coding
3487024	G	A	Prupe.1G049500	MODIFIER	upstream_gene_variant	.	protein_coding
3487024	G	A	Prupe.1G049700	MODIFIER	upstream_gene_variant	.	protein_coding
3487137	C	G	Prupe.1G049600	LOW	synonymous_variant	p.Leu56Leu	protein_coding
3487137	C	G	Prupe.1G049700	MODIFIER	upstream_gene_variant	.	protein_coding
3487387	G	A	Prupe.1G049600	MODERATE	missense_variant	p.Asp140Asn	protein_coding
3487387	G	A	Prupe.1G049700	MODIFIER	upstream_gene_variant	.	protein_coding
3487414	G	A	Prupe.1G049600	MODERATE	missense_variant	p.Ala149Thr	protein_coding
3487414	G	A	Prupe.1G049700	MODIFIER	upstream_gene_variant	.	protein_coding
3515658	C	T	Prupe.1G050000	MODIFIER	downstream_gene_variant	.	protein_coding
3515658	C	T	Prupe.1G050100	MODIFIER	downstream_gene_variant	.	protein_coding
3515658	C	T	Prupe.1G050200	MODIFIER	intron_variant	.	protein_coding
3515828	A	G	Prupe.1G050200	LOW	synonymous_variant	p.Pro177Pro	protein_coding
3515828	A	G	Prupe.1G050000	MODIFIER	downstream_gene_variant	.	protein_coding
3515828	A	G	Prupe.1G050100	MODIFIER	downstream_gene_variant	.	protein_coding
3540775	A	G	Prupe.1G050600	MODIFIER	3_prime_UTR_variant	.	protein_coding
3557776	T	C	Prupe.1G050700	MODIFIER	3_prime_UTR_variant	.	protein_coding
3557776	T	C	Prupe.1G050800	MODIFIER	downstream_gene_variant	.	protein_coding
3562698	T	A	Prupe.1G050800	MODIFIER	3_prime_UTR_variant	.	protein_coding
3562698	T	A	Prupe.1G050700	MODIFIER	downstream_gene_variant	.	protein_coding
3562698	T	A	Prupe.1G050800	MODIFIER	intron_variant	.	protein_coding
3562698	T	A	Prupe.1G050800	MODIFIER	intron_variant	.	protein_coding
3562772	A	G	Prupe.1G050800	MODIFIER	3_prime_UTR_variant	.	protein_coding
3562772	A	G	Prupe.1G050700	MODIFIER	downstream_gene_variant	.	protein_coding
3562772	A	G	Prupe.1G050800	MODIFIER	intron_variant	.	protein_coding
3562772	A	G	Prupe.1G050800	MODIFIER	intron_variant	.	protein_coding
3565041	T	G	Prupe.1G050800	LOW	synonymous_variant	p.Val121Val	protein_coding
3565440	G	A	Prupe.1G050800	MODIFIER	5_prime_UTR_variant	.	protein_coding
3565440	G	A	Prupe.1G050800	MODIFIER	upstream_gene_variant	.	protein_coding
3577338	G	A	Prupe.1G051000	MODIFIER	downstream_gene_variant	.	protein_coding
3577338	G	A	Prupe.1G050900	MODIFIER	intron_variant	.	protein_coding
3577338	G	A	Prupe.1G050900	MODIFIER	intron_variant	.	protein_coding
3656568	A	G	Prupe.1G052400	LOW	synonymous_variant	p.Thr85Thr	protein_coding
3656598	G	T	Prupe.1G052400	LOW	synonymous_variant	p.Arg75Arg	protein_coding
3656685	A	G	Prupe.1G052400	LOW	synonymous_variant	p.Ala46Ala	protein_coding
3694383	G	C	Prupe.1G052800	MODIFIER	upstream_gene_variant	.	protein_coding
3694383	G	C	Prupe.1G052900	MODIFIER	upstream_gene_variant	.	protein_coding
3694383	G	C	Prupe.1G052700	MODIFIER	downstream_gene_variant	.	protein_coding
3694383	G	C	Prupe.1G053000	MODIFIER	downstream_gene_variant	.	protein_coding
3694383	G	C	Prupe.1G052900-Prupe.1G053000	MODIFIER	intergenic_region	.	.
3694422	A	C	Prupe.1G052800	MODIFIER	upstream_gene_variant	.	protein_coding
3694422	A	C	Prupe.1G052900	MODIFIER	upstream_gene_variant	.	protein_coding
3694422	A	C	Prupe.1G052700	MODIFIER	downstream_gene_variant	.	protein_coding
3694422	A	C	Prupe.1G053000	MODIFIER	downstream_gene_variant	.	protein_coding
3694422	A	C	Prupe.1G052900-Prupe.1G053000	MODIFIER	intergenic_region	.	.
3694472	A	G	Prupe.1G052800	MODIFIER	upstream_gene_variant	.	protein_coding
3694472	A	G	Prupe.1G052900	MODIFIER	upstream_gene_variant	.	protein_coding
3694472	A	G	Prupe.1G052700	MODIFIER	downstream_gene_variant	.	protein_coding
3694472	A	G	Prupe.1G053000	MODIFIER	downstream_gene_variant	.	protein_coding
3694472	A	G	Prupe.1G052900-Prupe.1G053000	MODIFIER	intergenic_region	.	.
3694498	T	C	Prupe.1G052800	MODIFIER	upstream_gene_variant	.	protein_coding
3694498	T	C	Prupe.1G052900	MODIFIER	upstream_gene_variant	.	protein_coding
3694498	T	C	Prupe.1G052700	MODIFIER	downstream_gene_variant	.	protein_coding
3694498	T	C	Prupe.1G053000	MODIFIER	downstream_gene_variant	.	protein_coding
3694498	T	C	Prupe.1G052900-Prupe.1G053000	MODIFIER	intergenic_region	.	.
3694510	C	G	Prupe.1G052800	MODIFIER	upstream_gene_variant	.	protein_coding
3694510	C	G	Prupe.1G052900	MODIFIER	upstream_gene_variant	.	protein_coding
3694510	C	G	Prupe.1G052700	MODIFIER	downstream_gene_variant	.	protein_coding
3694510	C	G	Prupe.1G053000	MODIFIER	downstream_gene_variant	.	protein_coding
3694510	C	G	Prupe.1G052900-Prupe.1G053000	MODIFIER	intergenic_region	.	.
3698263	G	A	Prupe.1G053000	MODERATE	missense_variant	p.Leu243Phe	protein_coding
3698263	G	A	Prupe.1G053100	MODIFIER	upstream_gene_variant	.	protein_coding
3698298	T	C	Prupe.1G053000	MODERATE	missense_variant	p.Glu231Gly	protein_coding
3698298	T	C	Prupe.1G053100	MODIFIER	upstream_gene_variant	.	protein_coding
3698413	A	G	Prupe.1G053000	MODERATE	missense_variant	p.Cys193Arg	protein_coding
3698413	A	G	Prupe.1G053100	MODIFIER	upstream_gene_variant	.	protein_coding
3698446	T	A	Prupe.1G053000	MODERATE	missense_variant	p.Met182Leu	protein_coding
3698446	T	A	Prupe.1G053100	MODIFIER	upstream_gene_variant	.	protein_coding
3698468	C	A	Prupe.1G053000	LOW	synonymous_variant	p.Thr174Thr	protein_coding
3698468	C	A	Prupe.1G053100	MODIFIER	upstream_gene_variant	.	protein_coding
3698480	G	A	Prupe.1G053000	LOW	synonymous_variant	p.Leu170Leu	protein_coding
3698480	G	A	Prupe.1G053100	MODIFIER	upstream_gene_variant	.	protein_coding
3698487	A	T	Prupe.1G053000	MODERATE	missense_variant	p.Ile168Asn	protein_coding
3698487	A	T	Prupe.1G053100	MODIFIER	upstream_gene_variant	.	protein_coding
3698490	C	T	Prupe.1G053000	MODERATE	missense_variant	p.Gly167Glu	protein_coding
3698490	C	T	Prupe.1G053100	MODIFIER	upstream_gene_variant	.	protein_coding
3698503	T	G	Prupe.1G053000	MODERATE	missense_variant	p.Met163Leu	protein_coding
3698503	T	G	Prupe.1G053100	MODIFIER	upstream_gene_variant	.	protein_coding
3792847	T	C	Prupe.1G054200	LOW	synonymous_variant	p.Leu400Leu	protein_coding
3792885	T	C	Prupe.1G054200	LOW	splice_region_variant&intron_variant	.	protein_coding
3792905	C	A	Prupe.1G054200	MODIFIER	intron_variant	.	protein_coding
3792924	A	T	Prupe.1G054200	MODIFIER	intron_variant	.	protein_coding
3805572	C	T	Prupe.1G054200	MODIFIER	3_prime_UTR_variant	.	protein_coding
3805572	C	T	Prupe.1G054200	MODIFIER	3_prime_UTR_variant	.	protein_coding
3834459	A	G	Prupe.1G054400-Prupe.1G054500	MODIFIER	intergenic_region	.	.
3834469	A	T	Prupe.1G054400-Prupe.1G054500	MODIFIER	intergenic_region	.	.
3834472	T	G	Prupe.1G054400-Prupe.1G054500	MODIFIER	intergenic_region	.	.
3834681	T	A	Prupe.1G054400-Prupe.1G054500	MODIFIER	intergenic_region	.	.
3834682	C	G	Prupe.1G054400-Prupe.1G054500	MODIFIER	intergenic_region	.	.
3847552	A	T	Prupe.1G054700	MODIFIER	downstream_gene_variant	.	protein_coding
3847552	A	T	Prupe.1G054600	MODIFIER	intron_variant	.	protein_coding
3847552	A	T	Prupe.1G054600	MODIFIER	intron_variant	.	protein_coding
3847667	T	C	Prupe.1G054700	MODIFIER	downstream_gene_variant	.	protein_coding
3847667	T	C	Prupe.1G054600	MODIFIER	intron_variant	.	protein_coding
3847667	T	C	Prupe.1G054600	MODIFIER	intron_variant	.	protein_coding
3923873	G	C	Prupe.1G055500	MODERATE	missense_variant	p.Gln88Glu	protein_coding
3923873	G	C	Prupe.1G055600	MODIFIER	downstream_gene_variant	.	protein_coding
3990228	T	G	Prupe.1G056100	MODIFIER	upstream_gene_variant	.	protein_coding
3990228	T	G	Prupe.1G056100-Prupe.1G056200	MODIFIER	intergenic_region	.	.
3990250	G	C	Prupe.1G056100	MODIFIER	upstream_gene_variant	.	protein_coding
3990250	G	C	Prupe.1G056100-Prupe.1G056200	MODIFIER	intergenic_region	.	.
3990301	G	A	Prupe.1G056100	MODIFIER	upstream_gene_variant	.	protein_coding
3990301	G	A	Prupe.1G056100-Prupe.1G056200	MODIFIER	intergenic_region	.	.
4006933	C	T	Prupe.1G056300	MODIFIER	upstream_gene_variant	.	protein_coding
4006933	C	T	Prupe.1G056200	MODIFIER	intron_variant	.	protein_coding
4021634	A	C	Prupe.1G056400	MODIFIER	upstream_gene_variant	.	protein_coding
4021634	A	C	Prupe.1G056500	MODIFIER	intron_variant	.	protein_coding
4083398	C	T	Prupe.1G057500	MODIFIER	downstream_gene_variant	.	protein_coding
4083398	C	T	Prupe.1G057400	MODIFIER	intron_variant	.	protein_coding
4083423	C	T	Prupe.1G057500	MODIFIER	downstream_gene_variant	.	protein_coding
4083423	C	T	Prupe.1G057400	MODIFIER	intron_variant	.	protein_coding
4083789	C	G	Prupe.1G057400	MODERATE	missense_variant	p.Ala263Gly	protein_coding
4083789	C	G	Prupe.1G057500	MODIFIER	downstream_gene_variant	.	protein_coding
4146767	T	C	Prupe.1G058400	MODIFIER	downstream_gene_variant	.	protein_coding
4146767	T	C	Prupe.1G058300-Prupe.1G058400	MODIFIER	intergenic_region	.	.
4146784	G	A	Prupe.1G058400	MODIFIER	downstream_gene_variant	.	protein_coding
4146784	G	A	Prupe.1G058300-Prupe.1G058400	MODIFIER	intergenic_region	.	.
4146793	C	A	Prupe.1G058400	MODIFIER	downstream_gene_variant	.	protein_coding
4146793	C	A	Prupe.1G058300-Prupe.1G058400	MODIFIER	intergenic_region	.	.
4146842	A	T	Prupe.1G058400	MODIFIER	downstream_gene_variant	.	protein_coding
4146842	A	T	Prupe.1G058300-Prupe.1G058400	MODIFIER	intergenic_region	.	.
4147102	C	T	Prupe.1G058400	MODIFIER	downstream_gene_variant	.	protein_coding
4147102	C	T	Prupe.1G058300-Prupe.1G058400	MODIFIER	intergenic_region	.	.
4147123	G	A	Prupe.1G058400	MODIFIER	downstream_gene_variant	.	protein_coding
4147123	G	A	Prupe.1G058300-Prupe.1G058400	MODIFIER	intergenic_region	.	.
4233098	C	A	Prupe.1G059800	LOW	synonymous_variant	p.Val34Val	protein_coding
4233098	C	A	Prupe.1G059900	MODIFIER	downstream_gene_variant	.	protein_coding
4233130	G	C	Prupe.1G059800	MODERATE	missense_variant	p.Leu24Val	protein_coding
4233130	G	C	Prupe.1G059900	MODIFIER	downstream_gene_variant	.	protein_coding
4233148	T	G	Prupe.1G059800	MODERATE	missense_variant	p.Ile18Leu	protein_coding
4233148	T	G	Prupe.1G059900	MODIFIER	downstream_gene_variant	.	protein_coding
4233164	A	G	Prupe.1G059800	LOW	synonymous_variant	p.Thr12Thr	protein_coding
4233164	A	G	Prupe.1G059900	MODIFIER	downstream_gene_variant	.	protein_coding
4233208	T	G	Prupe.1G059800	MODIFIER	upstream_gene_variant	.	protein_coding
4233208	T	G	Prupe.1G059900	MODIFIER	downstream_gene_variant	.	protein_coding
4233208	T	G	Prupe.1G059800-Prupe.1G059900	MODIFIER	intergenic_region	.	.
4271869	C	T	Prupe.1G060700	LOW	synonymous_variant	p.Leu506Leu	protein_coding
4271869	C	T	Prupe.1G060600	MODIFIER	downstream_gene_variant	.	protein_coding
4271909	A	C	Prupe.1G060700	MODERATE	missense_variant	p.Ile493Arg	protein_coding
4271909	A	C	Prupe.1G060600	MODIFIER	downstream_gene_variant	.	protein_coding
4271919	C	T	Prupe.1G060700	MODERATE	missense_variant	p.Gly490Arg	protein_coding
4271919	C	T	Prupe.1G060600	MODIFIER	downstream_gene_variant	.	protein_coding
4272375	G	T	Prupe.1G060700	MODERATE	missense_variant	p.Leu338Ile	protein_coding
4272375	G	T	Prupe.1G060600	MODIFIER	downstream_gene_variant	.	protein_coding
4272415	T	A	Prupe.1G060700	LOW	synonymous_variant	p.Pro324Pro	protein_coding
4272415	T	A	Prupe.1G060600	MODIFIER	downstream_gene_variant	.	protein_coding
4284262	C	A	Prupe.1G060900	MODIFIER	downstream_gene_variant	.	protein_coding
4284262	C	A	Prupe.1G060800	MODIFIER	intron_variant	.	protein_coding
4284360	C	T	Prupe.1G060900	MODIFIER	downstream_gene_variant	.	protein_coding
4284360	C	T	Prupe.1G060800	MODIFIER	intron_variant	.	protein_coding
4322607	A	G	Prupe.1G061200	LOW	synonymous_variant	p.Ser940Ser	protein_coding
4323022	C	T	Prupe.1G061200	MODIFIER	intron_variant	.	protein_coding
4323450	A	C	Prupe.1G061200	LOW	synonymous_variant	p.Ser1056Ser	protein_coding
4323575	A	G	Prupe.1G061200	MODIFIER	intron_variant	.	protein_coding
4323585	T	G	Prupe.1G061200	MODIFIER	intron_variant	.	protein_coding
4323869	A	T	Prupe.1G061200	MODIFIER	intron_variant	.	protein_coding
4323880	T	C	Prupe.1G061200	MODIFIER	intron_variant	.	protein_coding
4455815	C	G	Prupe.1G062500	MODERATE	missense_variant	p.Thr41Ser	protein_coding
4455815	C	G	Prupe.1G062600	MODIFIER	upstream_gene_variant	.	protein_coding
4455815	C	G	Prupe.1G062400	MODIFIER	downstream_gene_variant	.	protein_coding
4455863	A	T	Prupe.1G062500	MODERATE	missense_variant	p.Gln57Leu	protein_coding
4455863	A	T	Prupe.1G062600	MODIFIER	upstream_gene_variant	.	protein_coding
4455863	A	T	Prupe.1G062400	MODIFIER	downstream_gene_variant	.	protein_coding
4571238	A	G	Prupe.1G064100	MODERATE	missense_variant	p.Glu75Gly	protein_coding
4571238	A	G	Prupe.1G064200	MODIFIER	upstream_gene_variant	.	protein_coding
4571238	A	G	Prupe.1G064000	MODIFIER	downstream_gene_variant	.	protein_coding
4571273	G	C	Prupe.1G064100	MODERATE	missense_variant	p.Glu87Gln	protein_coding
4571273	G	C	Prupe.1G064200	MODIFIER	upstream_gene_variant	.	protein_coding
4571273	G	C	Prupe.1G064000	MODIFIER	downstream_gene_variant	.	protein_coding
4571317	G	A	Prupe.1G064100	LOW	synonymous_variant	p.Lys101Lys	protein_coding
4571317	G	A	Prupe.1G064200	MODIFIER	upstream_gene_variant	.	protein_coding
4571317	G	A	Prupe.1G064000	MODIFIER	downstream_gene_variant	.	protein_coding
4571449	T	C	Prupe.1G064100	LOW	synonymous_variant	p.Asp145Asp	protein_coding
4571449	T	C	Prupe.1G064200	MODIFIER	upstream_gene_variant	.	protein_coding
4571449	T	C	Prupe.1G064000	MODIFIER	downstream_gene_variant	.	protein_coding
4579891	A	G	Prupe.1G064300	MODERATE	missense_variant	p.Thr36Ala	protein_coding
4579891	A	G	Prupe.1G064200	MODIFIER	downstream_gene_variant	.	protein_coding
4579891	A	G	Prupe.1G064400	MODIFIER	downstream_gene_variant	.	protein_coding
4596723	A	G	Prupe.1G064700	MODIFIER	downstream_gene_variant	.	protein_coding
4596723	A	G	Prupe.1G064600	MODIFIER	intron_variant	.	protein_coding
4596749	A	G	Prupe.1G064700	MODIFIER	downstream_gene_variant	.	protein_coding
4596749	A	G	Prupe.1G064600	MODIFIER	intron_variant	.	protein_coding
4745756	G	T	Prupe.1G066300	MODERATE	missense_variant	p.Thr50Asn	protein_coding
4745756	G	T	Prupe.1G066400	MODIFIER	upstream_gene_variant	.	protein_coding
4776680	T	C	Prupe.1G066900	MODIFIER	upstream_gene_variant	.	protein_coding
4776680	T	C	Prupe.1G067100	MODIFIER	downstream_gene_variant	.	protein_coding
4776680	T	C	Prupe.1G067000	MODIFIER	intron_variant	.	protein_coding
4776689	C	T	Prupe.1G066900	MODIFIER	upstream_gene_variant	.	protein_coding
4776689	C	T	Prupe.1G067100	MODIFIER	downstream_gene_variant	.	protein_coding
4776689	C	T	Prupe.1G067000	MODIFIER	intron_variant	.	protein_coding
4981434	G	A	Prupe.1G070200	MODERATE	missense_variant	p.Val674Ile	protein_coding
4981434	G	A	Prupe.1G070100	MODIFIER	downstream_gene_variant	.	protein_coding
5038167	G	C	Prupe.1G071200	MODIFIER	upstream_gene_variant	.	protein_coding
5038167	G	C	Prupe.1G071100	MODIFIER	downstream_gene_variant	.	protein_coding
5038167	G	C	Prupe.1G071100-Prupe.1G071200	MODIFIER	intergenic_region	.	.
5038493	C	G	Prupe.1G071200	MODIFIER	upstream_gene_variant	.	protein_coding
5038493	C	G	Prupe.1G071100	MODIFIER	downstream_gene_variant	.	protein_coding
5038493	C	G	Prupe.1G071100-Prupe.1G071200	MODIFIER	intergenic_region	.	.
5047953	C	T	Prupe.1G071200	MODIFIER	downstream_gene_variant	.	protein_coding
5047953	C	T	Prupe.1G071300	MODIFIER	intron_variant	.	protein_coding
5048186	A	T	Prupe.1G071300	MODIFIER	5_prime_UTR_variant	.	protein_coding
5048186	A	T	Prupe.1G071200	MODIFIER	downstream_gene_variant	.	protein_coding
5087996	C	A	Prupe.1G071800	MODERATE	missense_variant	p.Asp193Glu	protein_coding
5087996	C	A	Prupe.1G071700	MODIFIER	downstream_gene_variant	.	protein_coding
5088348	T	C	Prupe.1G071800	LOW	synonymous_variant	p.Leu311Leu	protein_coding
5088530	G	T	Prupe.1G071800	LOW	synonymous_variant	p.Gly371Gly	protein_coding
5258145	T	G	Prupe.1G073600	MODIFIER	intron_variant	.	protein_coding
5258145	T	G	Prupe.1G073600	MODIFIER	intron_variant	.	protein_coding
5258179	T	G	Prupe.1G073600	MODIFIER	intron_variant	.	protein_coding
5258179	T	G	Prupe.1G073600	MODIFIER	intron_variant	.	protein_coding
5258324	T	A	Prupe.1G073600	MODIFIER	intron_variant	.	protein_coding
5258324	T	A	Prupe.1G073600	MODIFIER	intron_variant	.	protein_coding
5267386	T	C	Prupe.1G073700	MODERATE	missense_variant	p.Thr545Ala	protein_coding
5338093	T	C	Prupe.1G074500	MODERATE	missense_variant	p.Met196Thr	protein_coding
5338093	T	C	Prupe.1G074400	MODIFIER	downstream_gene_variant	.	protein_coding
5338093	T	C	Prupe.1G074600	MODIFIER	downstream_gene_variant	.	protein_coding
5338358	A	T	Prupe.1G074500	MODERATE	missense_variant	p.Lys284Asn	protein_coding
5338358	A	T	Prupe.1G074400	MODIFIER	downstream_gene_variant	.	protein_coding
5338358	A	T	Prupe.1G074600	MODIFIER	downstream_gene_variant	.	protein_coding
5338398	A	T	Prupe.1G074500	MODERATE	missense_variant	p.Ser298Cys	protein_coding
5338398	A	T	Prupe.1G074400	MODIFIER	downstream_gene_variant	.	protein_coding
5338398	A	T	Prupe.1G074600	MODIFIER	downstream_gene_variant	.	protein_coding
5394796	T	C	Prupe.1G075300	MODIFIER	5_prime_UTR_variant	.	protein_coding
5394796	T	C	Prupe.1G075100	MODIFIER	downstream_gene_variant	.	protein_coding
5394796	T	C	Prupe.1G075200	MODIFIER	downstream_gene_variant	.	protein_coding
5394797	G	A	Prupe.1G075300	MODIFIER	5_prime_UTR_variant	.	protein_coding
5394797	G	A	Prupe.1G075100	MODIFIER	downstream_gene_variant	.	protein_coding
5394797	G	A	Prupe.1G075200	MODIFIER	downstream_gene_variant	.	protein_coding
5395011	G	T	Prupe.1G075300	MODIFIER	5_prime_UTR_variant	.	protein_coding
5395011	G	T	Prupe.1G075100	MODIFIER	downstream_gene_variant	.	protein_coding
5395011	G	T	Prupe.1G075200	MODIFIER	downstream_gene_variant	.	protein_coding
5395044	T	C	Prupe.1G075300	MODIFIER	5_prime_UTR_variant	.	protein_coding
5395044	T	C	Prupe.1G075100	MODIFIER	downstream_gene_variant	.	protein_coding
5395044	T	C	Prupe.1G075200	MODIFIER	downstream_gene_variant	.	protein_coding
5395077	T	C	Prupe.1G075200	MODIFIER	downstream_gene_variant	.	protein_coding
5395077	T	C	Prupe.1G075300	MODIFIER	intron_variant	.	protein_coding
5424013	A	G	Prupe.1G075600	MODIFIER	upstream_gene_variant	.	protein_coding
5424013	A	G	Prupe.1G075800	MODIFIER	intron_variant	.	protein_coding
5424032	G	C	Prupe.1G075600	MODIFIER	upstream_gene_variant	.	protein_coding
5424032	G	C	Prupe.1G075800	MODIFIER	intron_variant	.	protein_coding
5459068	G	A	Prupe.1G075900	MODIFIER	upstream_gene_variant	.	protein_coding
5459068	G	A	Prupe.1G075900-Prupe.1G076000	MODIFIER	intergenic_region	.	.
5477742	A	C	Prupe.1G076100	MODIFIER	downstream_gene_variant	.	protein_coding
5477742	A	C	Prupe.1G076000	MODIFIER	intron_variant	.	protein_coding
5478422	T	C	Prupe.1G076200	MODIFIER	upstream_gene_variant	.	protein_coding
5478422	T	C	Prupe.1G076100	MODIFIER	downstream_gene_variant	.	protein_coding
5478422	T	C	Prupe.1G076000	MODIFIER	intron_variant	.	protein_coding
5478453	G	A	Prupe.1G076000	LOW	synonymous_variant	p.Glu140Glu	protein_coding
5478453	G	A	Prupe.1G076200	MODIFIER	upstream_gene_variant	.	protein_coding
5478453	G	A	Prupe.1G076100	MODIFIER	downstream_gene_variant	.	protein_coding
5478456	A	G	Prupe.1G076000	MODERATE	missense_variant	p.Ile141Met	protein_coding
5478456	A	G	Prupe.1G076200	MODIFIER	upstream_gene_variant	.	protein_coding
5478456	A	G	Prupe.1G076100	MODIFIER	downstream_gene_variant	.	protein_coding
5581572	G	A	Prupe.1G077200	LOW	splice_region_variant&intron_variant	.	protein_coding
5581572	G	A	Prupe.1G077300	MODIFIER	downstream_gene_variant	.	protein_coding
5588028	T	G	Prupe.1G077400	MODERATE	missense_variant	p.Ser137Ala	protein_coding
5588028	T	G	Prupe.1G077400	MODERATE	missense_variant	p.Ser137Ala	protein_coding
5588028	T	G	Prupe.1G077300	MODIFIER	upstream_gene_variant	.	protein_coding
5589329	C	T	Prupe.1G077400	LOW	synonymous_variant	p.Pro570Pro	protein_coding
5589329	C	T	Prupe.1G077400	LOW	synonymous_variant	p.Pro570Pro	protein_coding
5589329	C	T	Prupe.1G077300	MODIFIER	upstream_gene_variant	.	protein_coding
5628932	T	C	Prupe.1G078200	LOW	synonymous_variant	p.Ala326Ala	protein_coding
5628932	T	C	Prupe.1G078200	LOW	synonymous_variant	p.Ala319Ala	protein_coding
5628932	T	C	Prupe.1G078300	MODIFIER	downstream_gene_variant	.	protein_coding
5629458	T	A	Prupe.1G078200	LOW	synonymous_variant	p.Ile395Ile	protein_coding
5629458	T	A	Prupe.1G078200	LOW	synonymous_variant	p.Ile391Ile	protein_coding
5629458	T	A	Prupe.1G078300	MODIFIER	downstream_gene_variant	.	protein_coding
5629563	G	A	Prupe.1G078200	LOW	synonymous_variant	p.Leu430Leu	protein_coding
5629563	G	A	Prupe.1G078200	LOW	synonymous_variant	p.Leu426Leu	protein_coding
5629563	G	A	Prupe.1G078300	MODIFIER	downstream_gene_variant	.	protein_coding
5723017	G	T	Prupe.1G078800-Prupe.1G078900	MODIFIER	intergenic_region	.	.
5744796	G	C	Prupe.1G078900	MODIFIER	5_prime_UTR_variant	.	protein_coding
5744821	A	G	Prupe.1G078900	LOW	5_prime_UTR_premature_start_codon_gain_variant	.	protein_coding
5744821	A	G	Prupe.1G078900	MODIFIER	5_prime_UTR_variant	.	protein_coding
5744837	A	G	Prupe.1G078900	MODIFIER	5_prime_UTR_variant	.	protein_coding
5744854	C	T	Prupe.1G078900	MODIFIER	5_prime_UTR_variant	.	protein_coding
5744887	T	A	Prupe.1G078900	MODIFIER	5_prime_UTR_variant	.	protein_coding
5745205	A	G	Prupe.1G078900	MODERATE	missense_variant	p.Ile15Val	protein_coding
5745205	A	G	Prupe.1G079000	MODIFIER	upstream_gene_variant	.	protein_coding
5745223	T	C	Prupe.1G078900	MODERATE	missense_variant	p.Ser21Pro	protein_coding
5745223	T	C	Prupe.1G079000	MODIFIER	upstream_gene_variant	.	protein_coding
5745224	C	A	Prupe.1G078900	MODERATE	missense_variant	p.Ser21Tyr	protein_coding
5745224	C	A	Prupe.1G079000	MODIFIER	upstream_gene_variant	.	protein_coding
5745228	C	A	Prupe.1G078900	LOW	synonymous_variant	p.Ser22Ser	protein_coding
5745228	C	A	Prupe.1G079000	MODIFIER	upstream_gene_variant	.	protein_coding
5745231	A	G	Prupe.1G078900	LOW	synonymous_variant	p.Ser23Ser	protein_coding
5745231	A	G	Prupe.1G079000	MODIFIER	upstream_gene_variant	.	protein_coding
5745233	G	T	Prupe.1G078900	MODERATE	missense_variant	p.Cys24Phe	protein_coding
5745233	G	T	Prupe.1G079000	MODIFIER	upstream_gene_variant	.	protein_coding
5745245	A	G	Prupe.1G078900	MODERATE	missense_variant	p.Gln28Arg	protein_coding
5745245	A	G	Prupe.1G079000	MODIFIER	upstream_gene_variant	.	protein_coding
5745266	A	G	Prupe.1G078900	MODERATE	missense_variant	p.His35Arg	protein_coding
5745266	A	G	Prupe.1G079000	MODIFIER	upstream_gene_variant	.	protein_coding
5748459	C	T	Prupe.1G078900	MODERATE	missense_variant	p.Pro391Leu	protein_coding
5748459	C	T	Prupe.1G079000	MODIFIER	upstream_gene_variant	.	protein_coding
5748480	A	G	Prupe.1G078900	MODERATE	missense_variant	p.Asn398Ser	protein_coding
5748480	A	G	Prupe.1G079000	MODIFIER	upstream_gene_variant	.	protein_coding
5748482	A	G	Prupe.1G078900	MODERATE	missense_variant	p.Ile399Val	protein_coding
5748482	A	G	Prupe.1G079000	MODIFIER	upstream_gene_variant	.	protein_coding
5748509	T	C	Prupe.1G078900	LOW	synonymous_variant	p.Leu408Leu	protein_coding
5748509	T	C	Prupe.1G079000	MODIFIER	upstream_gene_variant	.	protein_coding
5748539	G	A	Prupe.1G078900	MODERATE	missense_variant	p.Ala418Thr	protein_coding
5748539	G	A	Prupe.1G079000	MODIFIER	upstream_gene_variant	.	protein_coding
5750979	G	T	Prupe.1G079000	MODERATE	missense_variant	p.Glu215Asp	protein_coding
5750979	G	T	Prupe.1G078900	MODIFIER	downstream_gene_variant	.	protein_coding
5835180	T	C	Prupe.1G079800	MODIFIER	downstream_gene_variant	.	protein_coding
5835180	T	C	Prupe.1G079900	MODIFIER	intron_variant	.	protein_coding
5835192	A	G	Prupe.1G079800	MODIFIER	downstream_gene_variant	.	protein_coding
5835192	A	G	Prupe.1G079900	MODIFIER	intron_variant	.	protein_coding
5835197	G	C	Prupe.1G079800	MODIFIER	downstream_gene_variant	.	protein_coding
5835197	G	C	Prupe.1G079900	MODIFIER	intron_variant	.	protein_coding
5835569	A	C	Prupe.1G079900	MODERATE	missense_variant	p.Thr73Pro	protein_coding
5835569	A	C	Prupe.1G080000	MODIFIER	upstream_gene_variant	.	protein_coding
5835569	A	C	Prupe.1G079800	MODIFIER	downstream_gene_variant	.	protein_coding
5927211	T	G	Prupe.1G080700	MODIFIER	downstream_gene_variant	.	protein_coding
5927211	T	G	Prupe.1G080800	MODIFIER	downstream_gene_variant	.	protein_coding
5927211	T	G	Prupe.1G080900	MODIFIER	intron_variant	.	protein_coding
5927417	C	A	Prupe.1G080700	MODIFIER	downstream_gene_variant	.	protein_coding
5927417	C	A	Prupe.1G080800	MODIFIER	downstream_gene_variant	.	protein_coding
5927417	C	A	Prupe.1G080900	MODIFIER	intron_variant	.	protein_coding
5987062	G	T	Prupe.1G081500	MODIFIER	intron_variant	.	protein_coding
5987304	A	C	Prupe.1G081500	MODIFIER	intron_variant	.	protein_coding
5987323	T	A	Prupe.1G081500	MODIFIER	intron_variant	.	protein_coding
5987363	G	A	Prupe.1G081500	MODIFIER	intron_variant	.	protein_coding
6014360	T	G	Prupe.1G081700	MODERATE	missense_variant	p.Lys244Asn	protein_coding
6014360	T	G	Prupe.1G081600	MODIFIER	downstream_gene_variant	.	protein_coding
6014360	T	G	Prupe.1G081700	MODIFIER	intron_variant	.	protein_coding
6061507	C	T	Prupe.1G081900	MODIFIER	downstream_gene_variant	.	protein_coding
6061507	C	T	Prupe.1G082000	MODIFIER	downstream_gene_variant	.	protein_coding
6061507	C	T	Prupe.1G081900-Prupe.1G082000	MODIFIER	intergenic_region	.	.
6061515	G	A	Prupe.1G081900	MODIFIER	downstream_gene_variant	.	protein_coding
6061515	G	A	Prupe.1G082000	MODIFIER	downstream_gene_variant	.	protein_coding
6061515	G	A	Prupe.1G081900-Prupe.1G082000	MODIFIER	intergenic_region	.	.
6061769	C	T	Prupe.1G081900	MODIFIER	downstream_gene_variant	.	protein_coding
6061769	C	T	Prupe.1G082000	MODIFIER	downstream_gene_variant	.	protein_coding
6061769	C	T	Prupe.1G081900-Prupe.1G082000	MODIFIER	intergenic_region	.	.
6061777	A	G	Prupe.1G081900	MODIFIER	downstream_gene_variant	.	protein_coding
6061777	A	G	Prupe.1G082000	MODIFIER	downstream_gene_variant	.	protein_coding
6061777	A	G	Prupe.1G081900-Prupe.1G082000	MODIFIER	intergenic_region	.	.
6155271	A	T	Prupe.1G083000	LOW	5_prime_UTR_premature_start_codon_gain_variant	.	protein_coding
6155271	A	T	Prupe.1G083000	MODIFIER	5_prime_UTR_variant	.	protein_coding
6155271	A	T	Prupe.1G082900	MODIFIER	downstream_gene_variant	.	protein_coding
6155271	A	T	Prupe.1G083000	MODIFIER	intron_variant	.	protein_coding
6155283	T	C	Prupe.1G083000	MODIFIER	5_prime_UTR_variant	.	protein_coding
6155283	T	C	Prupe.1G082900	MODIFIER	downstream_gene_variant	.	protein_coding
6155283	T	C	Prupe.1G083000	MODIFIER	intron_variant	.	protein_coding
6198839	A	G	Prupe.1G083400	MODIFIER	downstream_gene_variant	.	protein_coding
6198839	A	G	Prupe.1G083500	MODIFIER	intron_variant	.	protein_coding
6199292	G	A	Prupe.1G083400	MODIFIER	downstream_gene_variant	.	protein_coding
6199292	G	A	Prupe.1G083500	MODIFIER	intron_variant	.	protein_coding
6199764	A	G	Prupe.1G083400	MODIFIER	downstream_gene_variant	.	protein_coding
6199764	A	G	Prupe.1G083500	MODIFIER	intron_variant	.	protein_coding
6200086	G	A	Prupe.1G083400	MODIFIER	downstream_gene_variant	.	protein_coding
6200086	G	A	Prupe.1G083500	MODIFIER	intron_variant	.	protein_coding
6200112	A	G	Prupe.1G083400	MODIFIER	downstream_gene_variant	.	protein_coding
6200112	A	G	Prupe.1G083500	MODIFIER	intron_variant	.	protein_coding
6202120	A	G	Prupe.1G083400	MODIFIER	downstream_gene_variant	.	protein_coding
6202120	A	G	Prupe.1G083500	MODIFIER	intron_variant	.	protein_coding
6205631	C	T	Prupe.1G083500	MODIFIER	intron_variant	.	protein_coding
6291195	T	C	Prupe.1G084700	MODIFIER	3_prime_UTR_variant	.	protein_coding
6291195	T	C	Prupe.1G084500	MODIFIER	upstream_gene_variant	.	protein_coding
6291195	T	C	Prupe.1G084600	MODIFIER	upstream_gene_variant	.	protein_coding
6319211	G	A	Prupe.1G084900	LOW	synonymous_variant	p.Asp225Asp	protein_coding
6337291	T	A	Prupe.1G085200	MODIFIER	5_prime_UTR_variant	.	protein_coding
6337291	T	A	Prupe.1G085100	MODIFIER	upstream_gene_variant	.	protein_coding
6337291	T	A	Prupe.1G085300	MODIFIER	downstream_gene_variant	.	protein_coding
6337309	G	A	Prupe.1G085200	MODIFIER	5_prime_UTR_variant	.	protein_coding
6337309	G	A	Prupe.1G085100	MODIFIER	upstream_gene_variant	.	protein_coding
6337309	G	A	Prupe.1G085300	MODIFIER	downstream_gene_variant	.	protein_coding
6337316	A	C	Prupe.1G085200	LOW	5_prime_UTR_premature_start_codon_gain_variant	.	protein_coding
6337316	A	C	Prupe.1G085200	MODIFIER	5_prime_UTR_variant	.	protein_coding
6337316	A	C	Prupe.1G085100	MODIFIER	upstream_gene_variant	.	protein_coding
6337316	A	C	Prupe.1G085300	MODIFIER	downstream_gene_variant	.	protein_coding
6420688	C	T	Prupe.1G086300	MODIFIER	intron_variant	.	protein_coding
6471308	A	T	Prupe.1G086800	MODIFIER	intron_variant	.	protein_coding
6471578	G	A	Prupe.1G086800	MODIFIER	intron_variant	.	protein_coding
6471643	C	A	Prupe.1G086800	MODIFIER	intron_variant	.	protein_coding
6471644	G	A	Prupe.1G086800	MODIFIER	intron_variant	.	protein_coding
6486229	A	G	Prupe.1G087000	LOW	synonymous_variant	p.Asp177Asp	protein_coding
6486229	A	G	Prupe.1G086900	MODIFIER	upstream_gene_variant	.	protein_coding
6486229	A	G	Prupe.1G087100	MODIFIER	downstream_gene_variant	.	protein_coding
6486259	G	A	Prupe.1G087000	LOW	synonymous_variant	p.Pro167Pro	protein_coding
6486259	G	A	Prupe.1G086900	MODIFIER	upstream_gene_variant	.	protein_coding
6486259	G	A	Prupe.1G087100	MODIFIER	downstream_gene_variant	.	protein_coding
6486293	T	G	Prupe.1G087000	MODERATE	missense_variant	p.Glu156Ala	protein_coding
6486293	T	G	Prupe.1G086900	MODIFIER	upstream_gene_variant	.	protein_coding
6486293	T	G	Prupe.1G087100	MODIFIER	downstream_gene_variant	.	protein_coding
6505044	G	A	Prupe.1G087400	MODERATE	missense_variant	p.Arg504Gln	protein_coding
6505045	G	A	Prupe.1G087400	LOW	synonymous_variant	p.Arg504Arg	protein_coding
6505112	G	C	Prupe.1G087400	MODERATE	missense_variant	p.Gly527Arg	protein_coding
6509598	A	G	Prupe.1G087400	LOW	synonymous_variant	p.Lys1685Lys	protein_coding
6509604	A	G	Prupe.1G087400	LOW	synonymous_variant	p.Gln1687Gln	protein_coding
6509638	T	A	Prupe.1G087400	MODERATE	missense_variant	p.Leu1699Met	protein_coding
6509688	T	G	Prupe.1G087400	MODERATE	missense_variant	p.Asp1715Glu	protein_coding
6509814	T	G	Prupe.1G087400	MODIFIER	intron_variant	.	protein_coding
6509843	G	A	Prupe.1G087400	MODERATE	missense_variant	p.Arg1736Lys	protein_coding
6509873	A	C	Prupe.1G087400	MODERATE	missense_variant	p.Tyr1746Ser	protein_coding
6509895	T	C	Prupe.1G087400	LOW	synonymous_variant	p.Asp1753Asp	protein_coding
6532585	G	A	Prupe.1G087700	LOW	synonymous_variant	p.Glu136Glu	protein_coding
6532585	G	A	Prupe.1G087600	MODIFIER	downstream_gene_variant	.	protein_coding
6532710	G	C	Prupe.1G087700	MODERATE	missense_variant	p.Ser178Thr	protein_coding
6532710	G	C	Prupe.1G087600	MODIFIER	downstream_gene_variant	.	protein_coding
6532797	C	T	Prupe.1G087600	MODIFIER	downstream_gene_variant	.	protein_coding
6532797	C	T	Prupe.1G087700	MODIFIER	downstream_gene_variant	.	protein_coding
6532797	C	T	Prupe.1G087700-Prupe.1G087800	MODIFIER	intergenic_region	.	.
6532942	T	A	Prupe.1G087600	MODIFIER	downstream_gene_variant	.	protein_coding
6532942	T	A	Prupe.1G087700	MODIFIER	downstream_gene_variant	.	protein_coding
6532942	T	A	Prupe.1G087700-Prupe.1G087800	MODIFIER	intergenic_region	.	.
6532951	G	T	Prupe.1G087600	MODIFIER	downstream_gene_variant	.	protein_coding
6532951	G	T	Prupe.1G087700	MODIFIER	downstream_gene_variant	.	protein_coding
6532951	G	T	Prupe.1G087700-Prupe.1G087800	MODIFIER	intergenic_region	.	.
6533002	T	G	Prupe.1G087600	MODIFIER	downstream_gene_variant	.	protein_coding
6533002	T	G	Prupe.1G087700	MODIFIER	downstream_gene_variant	.	protein_coding
6533002	T	G	Prupe.1G087700-Prupe.1G087800	MODIFIER	intergenic_region	.	.
6533033	C	T	Prupe.1G087600	MODIFIER	downstream_gene_variant	.	protein_coding
6533033	C	T	Prupe.1G087700	MODIFIER	downstream_gene_variant	.	protein_coding
6533033	C	T	Prupe.1G087700-Prupe.1G087800	MODIFIER	intergenic_region	.	.
6666222	A	G	Prupe.1G089200	MODIFIER	downstream_gene_variant	.	protein_coding
6666222	A	G	Prupe.1G089300	MODIFIER	downstream_gene_variant	.	protein_coding
6666222	A	G	Prupe.1G089100	MODIFIER	intron_variant	.	protein_coding
6666247	A	T	Prupe.1G089200	MODIFIER	downstream_gene_variant	.	protein_coding
6666247	A	T	Prupe.1G089300	MODIFIER	downstream_gene_variant	.	protein_coding
6666247	A	T	Prupe.1G089100	MODIFIER	intron_variant	.	protein_coding
6666650	G	A	Prupe.1G089100	MODIFIER	upstream_gene_variant	.	protein_coding
6666650	G	A	Prupe.1G089200	MODIFIER	downstream_gene_variant	.	protein_coding
6666650	G	A	Prupe.1G089300	MODIFIER	downstream_gene_variant	.	protein_coding
6666650	G	A	Prupe.1G089100-Prupe.1G089300	MODIFIER	intergenic_region	.	.
6677678	T	G	Prupe.1G089300	MODERATE	missense_variant	p.Glu194Ala	protein_coding
6677764	A	G	Prupe.1G089300	LOW	synonymous_variant	p.Gly165Gly	protein_coding
6708393	C	T	Prupe.1G089600	MODERATE	missense_variant	p.Thr384Met	protein_coding
6708442	G	A	Prupe.1G089600	LOW	synonymous_variant	p.Pro400Pro	protein_coding
6708809	T	C	Prupe.1G089600	MODERATE	missense_variant	p.Ser523Pro	protein_coding
6717287	T	A	Prupe.1G089700	MODIFIER	upstream_gene_variant	.	protein_coding
6717287	T	A	Prupe.1G089600	MODIFIER	downstream_gene_variant	.	protein_coding
6717287	T	A	Prupe.1G089600-Prupe.1G089700	MODIFIER	intergenic_region	.	.
6717307	A	G	Prupe.1G089700	MODIFIER	upstream_gene_variant	.	protein_coding
6717307	A	G	Prupe.1G089600	MODIFIER	downstream_gene_variant	.	protein_coding
6717307	A	G	Prupe.1G089600-Prupe.1G089700	MODIFIER	intergenic_region	.	.
6717339	G	A	Prupe.1G089700	MODIFIER	upstream_gene_variant	.	protein_coding
6717339	G	A	Prupe.1G089600	MODIFIER	downstream_gene_variant	.	protein_coding
6717339	G	A	Prupe.1G089600-Prupe.1G089700	MODIFIER	intergenic_region	.	.
6789841	T	C	Prupe.1G090100	LOW	splice_region_variant&intron_variant	.	protein_coding
6789958	C	T	Prupe.1G090100	MODERATE	missense_variant	p.Cys445Tyr	protein_coding
6789958	C	T	Prupe.1G090100	LOW	splice_region_variant&intron_variant	.	protein_coding
6789960	T	C	Prupe.1G090100	LOW	splice_region_variant&intron_variant	.	protein_coding
6789960	T	C	Prupe.1G090100	LOW	synonymous_variant	p.Thr444Thr	protein_coding
6789983	A	G	Prupe.1G090100	LOW	synonymous_variant	p.Leu437Leu	protein_coding
6789983	A	G	Prupe.1G090100	LOW	synonymous_variant	p.Leu355Leu	protein_coding
6789983	A	G	Prupe.1G090100	LOW	synonymous_variant	p.Leu342Leu	protein_coding
6789983	A	G	Prupe.1G090100	MODIFIER	3_prime_UTR_variant	.	protein_coding
6806945	T	C	Prupe.1G090300	MODIFIER	intron_variant	.	protein_coding
6871895	T	C	Prupe.1G091300	LOW	synonymous_variant	p.Pro40Pro	protein_coding
6871895	T	C	Prupe.1G091200	MODIFIER	upstream_gene_variant	.	protein_coding
6871895	T	C	Prupe.1G091400	MODIFIER	downstream_gene_variant	.	protein_coding
6909692	T	C	Prupe.1G091700	MODIFIER	3_prime_UTR_variant	.	protein_coding
6909692	T	C	Prupe.1G091600	MODIFIER	downstream_gene_variant	.	protein_coding
6909699	G	C	Prupe.1G091700	MODIFIER	3_prime_UTR_variant	.	protein_coding
6909699	G	C	Prupe.1G091600	MODIFIER	downstream_gene_variant	.	protein_coding
6909741	T	A	Prupe.1G091700	MODIFIER	3_prime_UTR_variant	.	protein_coding
6909741	T	A	Prupe.1G091600	MODIFIER	downstream_gene_variant	.	protein_coding
6987429	G	A	Prupe.1G092200	MODIFIER	upstream_gene_variant	.	protein_coding
6987429	G	A	Prupe.1G092300	MODIFIER	downstream_gene_variant	.	protein_coding
6987429	G	A	Prupe.1G092200-Prupe.1G092300	MODIFIER	intergenic_region	.	.
6987446	C	G	Prupe.1G092200	MODIFIER	upstream_gene_variant	.	protein_coding
6987446	C	G	Prupe.1G092300	MODIFIER	downstream_gene_variant	.	protein_coding
6987446	C	G	Prupe.1G092200-Prupe.1G092300	MODIFIER	intergenic_region	.	.
6987465	A	T	Prupe.1G092200	MODIFIER	upstream_gene_variant	.	protein_coding
6987465	A	T	Prupe.1G092300	MODIFIER	downstream_gene_variant	.	protein_coding
6987465	A	T	Prupe.1G092200-Prupe.1G092300	MODIFIER	intergenic_region	.	.
6987664	C	T	Prupe.1G092200	MODIFIER	upstream_gene_variant	.	protein_coding
6987664	C	T	Prupe.1G092300	MODIFIER	downstream_gene_variant	.	protein_coding
6987664	C	T	Prupe.1G092200-Prupe.1G092300	MODIFIER	intergenic_region	.	.
6987668	G	T	Prupe.1G092200	MODIFIER	upstream_gene_variant	.	protein_coding
6987668	G	T	Prupe.1G092300	MODIFIER	downstream_gene_variant	.	protein_coding
6987668	G	T	Prupe.1G092200-Prupe.1G092300	MODIFIER	intergenic_region	.	.
6987688	T	C	Prupe.1G092200	MODIFIER	upstream_gene_variant	.	protein_coding
6987688	T	C	Prupe.1G092300	MODIFIER	downstream_gene_variant	.	protein_coding
6987688	T	C	Prupe.1G092200-Prupe.1G092300	MODIFIER	intergenic_region	.	.
6987718	C	T	Prupe.1G092200	MODIFIER	upstream_gene_variant	.	protein_coding
6987718	C	T	Prupe.1G092300	MODIFIER	downstream_gene_variant	.	protein_coding
6987718	C	T	Prupe.1G092200-Prupe.1G092300	MODIFIER	intergenic_region	.	.
6987721	T	C	Prupe.1G092200	MODIFIER	upstream_gene_variant	.	protein_coding
6987721	T	C	Prupe.1G092300	MODIFIER	downstream_gene_variant	.	protein_coding
6987721	T	C	Prupe.1G092200-Prupe.1G092300	MODIFIER	intergenic_region	.	.
6987724	A	T	Prupe.1G092200	MODIFIER	upstream_gene_variant	.	protein_coding
6987724	A	T	Prupe.1G092300	MODIFIER	downstream_gene_variant	.	protein_coding
6987724	A	T	Prupe.1G092200-Prupe.1G092300	MODIFIER	intergenic_region	.	.
6987767	T	A	Prupe.1G092200	MODIFIER	upstream_gene_variant	.	protein_coding
6987767	T	A	Prupe.1G092300	MODIFIER	downstream_gene_variant	.	protein_coding
6987767	T	A	Prupe.1G092200-Prupe.1G092300	MODIFIER	intergenic_region	.	.
7110109	G	T	Prupe.1G093100-Prupe.1G093200	MODIFIER	intergenic_region	.	.
7110165	G	T	Prupe.1G093100-Prupe.1G093200	MODIFIER	intergenic_region	.	.
7153694	G	A	Prupe.1G093600	LOW	synonymous_variant	p.Ser395Ser	protein_coding
7153694	G	A	Prupe.1G093600	LOW	synonymous_variant	p.Ser358Ser	protein_coding
7153694	G	A	Prupe.1G093600	LOW	synonymous_variant	p.Ser395Ser	protein_coding
7153694	G	A	Prupe.1G093500	MODIFIER	upstream_gene_variant	.	protein_coding
7153781	T	G	Prupe.1G093600	LOW	synonymous_variant	p.Pro366Pro	protein_coding
7153781	T	G	Prupe.1G093600	LOW	synonymous_variant	p.Pro329Pro	protein_coding
7153781	T	G	Prupe.1G093600	LOW	synonymous_variant	p.Pro366Pro	protein_coding
7153781	T	G	Prupe.1G093500	MODIFIER	upstream_gene_variant	.	protein_coding
7153919	T	C	Prupe.1G093600	LOW	synonymous_variant	p.Gln320Gln	protein_coding
7153919	T	C	Prupe.1G093600	LOW	synonymous_variant	p.Gln283Gln	protein_coding
7153919	T	C	Prupe.1G093600	LOW	synonymous_variant	p.Gln320Gln	protein_coding
7153919	T	C	Prupe.1G093500	MODIFIER	upstream_gene_variant	.	protein_coding
7153921	G	C	Prupe.1G093600	MODERATE	missense_variant	p.Gln320Glu	protein_coding
7153921	G	C	Prupe.1G093600	MODERATE	missense_variant	p.Gln283Glu	protein_coding
7153921	G	C	Prupe.1G093600	MODERATE	missense_variant	p.Gln320Glu	protein_coding
7153921	G	C	Prupe.1G093500	MODIFIER	upstream_gene_variant	.	protein_coding
7157265	T	A	Prupe.1G093600	MODIFIER	upstream_gene_variant	.	protein_coding
7157265	T	A	Prupe.1G093600-Prupe.1G093700	MODIFIER	intergenic_region	.	.
7157269	C	T	Prupe.1G093600	MODIFIER	upstream_gene_variant	.	protein_coding
7157269	C	T	Prupe.1G093600-Prupe.1G093700	MODIFIER	intergenic_region	.	.
7157309	A	T	Prupe.1G093600	MODIFIER	upstream_gene_variant	.	protein_coding
7157309	A	T	Prupe.1G093600-Prupe.1G093700	MODIFIER	intergenic_region	.	.
7320242	G	T	Prupe.1G094400	MODERATE	missense_variant	p.Ala121Asp	protein_coding
7320262	A	G	Prupe.1G094400	LOW	synonymous_variant	p.Ser114Ser	protein_coding
7333409	C	T	Prupe.1G094500	MODIFIER	intron_variant	.	protein_coding
7333419	C	T	Prupe.1G094500	MODIFIER	intron_variant	.	protein_coding
7333420	T	C	Prupe.1G094500	MODIFIER	intron_variant	.	protein_coding
7333464	C	T	Prupe.1G094500	MODIFIER	intron_variant	.	protein_coding
7333588	C	G	Prupe.1G094500	MODIFIER	intron_variant	.	protein_coding
7362444	T	C	Prupe.1G094600	MODIFIER	intron_variant	.	protein_coding
7362464	A	G	Prupe.1G094600	MODIFIER	intron_variant	.	protein_coding
7362466	G	C	Prupe.1G094600	MODIFIER	intron_variant	.	protein_coding
7362494	C	G	Prupe.1G094600	MODIFIER	intron_variant	.	protein_coding
7362593	C	G	Prupe.1G094600	MODERATE	missense_variant	p.Ser105Arg	protein_coding
7362635	T	C	Prupe.1G094600	LOW	synonymous_variant	p.Ala119Ala	protein_coding
7362716	C	T	Prupe.1G094600	LOW	synonymous_variant	p.Phe146Phe	protein_coding
7362737	A	T	Prupe.1G094600	MODERATE	missense_variant	p.Lys153Asn	protein_coding
7362743	A	T	Prupe.1G094600	LOW	synonymous_variant	p.Ile155Ile	protein_coding
7362776	A	G	Prupe.1G094600	LOW	synonymous_variant	p.Glu166Glu	protein_coding
7362814	A	G	Prupe.1G094600	MODERATE	missense_variant	p.Asp179Gly	protein_coding
7362824	A	G	Prupe.1G094600	LOW	synonymous_variant	p.Pro182Pro	protein_coding
7363097	G	A	Prupe.1G094600	LOW	synonymous_variant	p.Ser273Ser	protein_coding
7363116	G	A	Prupe.1G094600	MODERATE	missense_variant	p.Val280Ile	protein_coding
7363125	C	T	Prupe.1G094600	MODERATE	missense_variant	p.His283Tyr	protein_coding
7363157	T	C	Prupe.1G094600	LOW	synonymous_variant	p.Phe293Phe	protein_coding
7363158	C	A	Prupe.1G094600	MODERATE	missense_variant	p.Gln294Lys	protein_coding
7363159	A	G	Prupe.1G094600	MODERATE	missense_variant	p.Gln294Arg	protein_coding
7363161	T	A	Prupe.1G094600	MODERATE	missense_variant	p.Ser295Thr	protein_coding
7363173	C	A	Prupe.1G094600	MODERATE	missense_variant	p.Gln299Lys	protein_coding
7368876	C	A	Prupe.1G094700	MODERATE	missense_variant	p.Ser62Tyr	protein_coding
7368876	C	A	Prupe.1G094600	MODIFIER	downstream_gene_variant	.	protein_coding
7368878	G	A	Prupe.1G094700	MODERATE	missense_variant	p.Glu63Lys	protein_coding
7368878	G	A	Prupe.1G094600	MODIFIER	downstream_gene_variant	.	protein_coding
7368890	C	G	Prupe.1G094600	MODIFIER	downstream_gene_variant	.	protein_coding
7368890	C	G	Prupe.1G094700	MODIFIER	intron_variant	.	protein_coding
7368902	C	T	Prupe.1G094600	MODIFIER	downstream_gene_variant	.	protein_coding
7368902	C	T	Prupe.1G094700	MODIFIER	intron_variant	.	protein_coding
7368921	C	G	Prupe.1G094600	MODIFIER	downstream_gene_variant	.	protein_coding
7368921	C	G	Prupe.1G094700	MODIFIER	intron_variant	.	protein_coding
7368922	A	G	Prupe.1G094600	MODIFIER	downstream_gene_variant	.	protein_coding
7368922	A	G	Prupe.1G094700	MODIFIER	intron_variant	.	protein_coding
7369060	T	A	Prupe.1G094700	MODERATE	missense_variant	p.Ser82Thr	protein_coding
7369060	T	A	Prupe.1G094600	MODIFIER	downstream_gene_variant	.	protein_coding
7369071	G	A	Prupe.1G094700	LOW	synonymous_variant	p.Ala85Ala	protein_coding
7369071	G	A	Prupe.1G094600	MODIFIER	downstream_gene_variant	.	protein_coding
7369074	G	C	Prupe.1G094700	MODERATE	missense_variant	p.Lys86Asn	protein_coding
7369074	G	C	Prupe.1G094600	MODIFIER	downstream_gene_variant	.	protein_coding
7369182	T	C	Prupe.1G094700	LOW	synonymous_variant	p.Phe122Phe	protein_coding
7369182	T	C	Prupe.1G094600	MODIFIER	downstream_gene_variant	.	protein_coding
7369185	C	T	Prupe.1G094700	LOW	synonymous_variant	p.Asp123Asp	protein_coding
7369185	C	T	Prupe.1G094600	MODIFIER	downstream_gene_variant	.	protein_coding
7369242	G	A	Prupe.1G094700	LOW	synonymous_variant	p.Glu142Glu	protein_coding
7369242	G	A	Prupe.1G094600	MODIFIER	downstream_gene_variant	.	protein_coding
7369280	G	A	Prupe.1G094700	MODERATE	missense_variant	p.Gly155Asp	protein_coding
7369280	G	A	Prupe.1G094600	MODIFIER	downstream_gene_variant	.	protein_coding
7523119	T	A	Prupe.1G095300	LOW	splice_region_variant	.	protein_coding
7523119	T	A	Prupe.1G095300	MODIFIER	3_prime_UTR_variant	.	protein_coding
7523119	T	A	Prupe.1G095300	MODIFIER	3_prime_UTR_variant	.	protein_coding
7523119	T	A	Prupe.1G095300	MODIFIER	3_prime_UTR_variant	.	protein_coding
7523119	T	A	Prupe.1G095300	MODIFIER	3_prime_UTR_variant	.	protein_coding
7523119	T	A	Prupe.1G095300	MODIFIER	3_prime_UTR_variant	.	protein_coding
7523119	T	A	Prupe.1G095300	MODIFIER	downstream_gene_variant	.	protein_coding
7552053	C	A	Prupe.1G095500	MODERATE	missense_variant	p.Ala805Ser	protein_coding
7585044	G	A	Prupe.1G096000	MODIFIER	upstream_gene_variant	.	protein_coding
7585044	G	A	Prupe.1G096100	MODIFIER	downstream_gene_variant	.	protein_coding
7585044	G	A	Prupe.1G096200	MODIFIER	downstream_gene_variant	.	protein_coding
7585044	G	A	Prupe.1G096000-Prupe.1G096100	MODIFIER	intergenic_region	.	.
7735120	T	G	Prupe.1G097200	LOW	splice_region_variant&intron_variant	.	protein_coding
7735120	T	G	Prupe.1G097200	LOW	synonymous_variant	p.Ser46Ser	protein_coding
7785328	C	T	Prupe.1G097500	LOW	synonymous_variant	p.Glu173Glu	protein_coding
7785328	C	T	Prupe.1G097500	LOW	synonymous_variant	p.Glu167Glu	protein_coding
7785328	C	T	Prupe.1G097400	MODIFIER	downstream_gene_variant	.	protein_coding
7785502	G	A	Prupe.1G097500	LOW	synonymous_variant	p.Phe115Phe	protein_coding
7785502	G	A	Prupe.1G097500	LOW	synonymous_variant	p.Phe109Phe	protein_coding
7785502	G	A	Prupe.1G097400	MODIFIER	downstream_gene_variant	.	protein_coding
7814389	G	A	Prupe.1G097900	MODIFIER	3_prime_UTR_variant	.	protein_coding
7814389	G	A	Prupe.1G097900	MODIFIER	3_prime_UTR_variant	.	protein_coding
7814389	G	A	Prupe.1G097800	MODIFIER	downstream_gene_variant	.	protein_coding
7814389	G	A	Prupe.1G097900	MODIFIER	downstream_gene_variant	.	protein_coding
7814397	C	T	Prupe.1G097900	MODIFIER	3_prime_UTR_variant	.	protein_coding
7814397	C	T	Prupe.1G097900	MODIFIER	3_prime_UTR_variant	.	protein_coding
7814397	C	T	Prupe.1G097800	MODIFIER	downstream_gene_variant	.	protein_coding
7814397	C	T	Prupe.1G097900	MODIFIER	downstream_gene_variant	.	protein_coding
7814425	C	G	Prupe.1G097900	MODIFIER	3_prime_UTR_variant	.	protein_coding
7814425	C	G	Prupe.1G097900	MODIFIER	3_prime_UTR_variant	.	protein_coding
7814425	C	G	Prupe.1G097800	MODIFIER	downstream_gene_variant	.	protein_coding
7814425	C	G	Prupe.1G097900	MODIFIER	downstream_gene_variant	.	protein_coding
7817343	C	T	Prupe.1G097900	MODIFIER	3_prime_UTR_variant	.	protein_coding
7817343	C	T	Prupe.1G097800	MODIFIER	downstream_gene_variant	.	protein_coding
7817343	C	T	Prupe.1G098000	MODIFIER	downstream_gene_variant	.	protein_coding
7817343	C	T	Prupe.1G097900	MODIFIER	intron_variant	.	protein_coding
7817343	C	T	Prupe.1G097900	MODIFIER	intron_variant	.	protein_coding
7817346	A	G	Prupe.1G097900	MODIFIER	3_prime_UTR_variant	.	protein_coding
7817346	A	G	Prupe.1G097800	MODIFIER	downstream_gene_variant	.	protein_coding
7817346	A	G	Prupe.1G098000	MODIFIER	downstream_gene_variant	.	protein_coding
7817346	A	G	Prupe.1G097900	MODIFIER	intron_variant	.	protein_coding
7817346	A	G	Prupe.1G097900	MODIFIER	intron_variant	.	protein_coding
7817417	G	T	Prupe.1G097900	MODIFIER	3_prime_UTR_variant	.	protein_coding
7817417	G	T	Prupe.1G097800	MODIFIER	downstream_gene_variant	.	protein_coding
7817417	G	T	Prupe.1G098000	MODIFIER	downstream_gene_variant	.	protein_coding
7817417	G	T	Prupe.1G097900	MODIFIER	intron_variant	.	protein_coding
7817417	G	T	Prupe.1G097900	MODIFIER	intron_variant	.	protein_coding
7857264	G	A	Prupe.1G098200	LOW	synonymous_variant	p.Val95Val	protein_coding
7857297	G	C	Prupe.1G098200	LOW	synonymous_variant	p.Val84Val	protein_coding
7857339	G	C	Prupe.1G098200	LOW	synonymous_variant	p.Leu70Leu	protein_coding
7866979	G	A	Prupe.1G098400	LOW	synonymous_variant	p.Ile13Ile	protein_coding
7866979	G	A	Prupe.1G098300	MODIFIER	upstream_gene_variant	.	protein_coding
7867062	A	C	Prupe.1G098400	MODIFIER	5_prime_UTR_variant	.	protein_coding
7867062	A	C	Prupe.1G098300	MODIFIER	upstream_gene_variant	.	protein_coding
7893454	C	T	Prupe.1G098900	MODIFIER	upstream_gene_variant	.	protein_coding
7893454	C	T	Prupe.1G098800	MODIFIER	intron_variant	.	protein_coding
7973780	T	C	Prupe.1G100000	LOW	splice_region_variant&intron_variant	.	protein_coding
7973780	T	C	Prupe.1G099900	MODIFIER	upstream_gene_variant	.	protein_coding
7974051	A	G	Prupe.1G099900	MODIFIER	upstream_gene_variant	.	protein_coding
7974051	A	G	Prupe.1G100000	MODIFIER	intron_variant	.	protein_coding
7994445	T	G	Prupe.1G100100	MODIFIER	upstream_gene_variant	.	protein_coding
7994445	T	G	Prupe.1G100300	MODIFIER	downstream_gene_variant	.	protein_coding
7994445	T	G	Prupe.1G100200	MODIFIER	intron_variant	.	protein_coding
7994553	T	C	Prupe.1G100300	MODIFIER	downstream_gene_variant	.	protein_coding
7994553	T	C	Prupe.1G100200	MODIFIER	intron_variant	.	protein_coding
7994570	G	C	Prupe.1G100200	HIGH	splice_acceptor_variant&intron_variant	.	protein_coding
7994570	G	C	Prupe.1G100300	MODIFIER	downstream_gene_variant	.	protein_coding
8160345	G	A	Prupe.1G102400	LOW	synonymous_variant	p.Gly1028Gly	protein_coding
8160345	G	A	Prupe.1G102300	MODIFIER	downstream_gene_variant	.	protein_coding
8190051	G	T	Prupe.1G102500	MODERATE	missense_variant	p.Gln667Lys	protein_coding
8190051	G	T	Prupe.1G102500	MODERATE	missense_variant	p.Gln451Lys	protein_coding
8190099	C	T	Prupe.1G102500	MODERATE	missense_variant	p.Gly651Ser	protein_coding
8190099	C	T	Prupe.1G102500	MODERATE	missense_variant	p.Gly435Ser	protein_coding
8213652	T	C	Prupe.1G102600	LOW	synonymous_variant	p.Ala350Ala	protein_coding
8213652	T	C	Prupe.1G102700	MODIFIER	downstream_gene_variant	.	protein_coding
8213652	T	C	Prupe.1G102800	MODIFIER	downstream_gene_variant	.	protein_coding
8213737	C	T	Prupe.1G102700	MODIFIER	downstream_gene_variant	.	protein_coding
8213737	C	T	Prupe.1G102800	MODIFIER	downstream_gene_variant	.	protein_coding
8213737	C	T	Prupe.1G102600	MODIFIER	intron_variant	.	protein_coding
8213738	T	G	Prupe.1G102700	MODIFIER	downstream_gene_variant	.	protein_coding
8213738	T	G	Prupe.1G102800	MODIFIER	downstream_gene_variant	.	protein_coding
8213738	T	G	Prupe.1G102600	MODIFIER	intron_variant	.	protein_coding
8213740	C	A	Prupe.1G102700	MODIFIER	downstream_gene_variant	.	protein_coding
8213740	C	A	Prupe.1G102800	MODIFIER	downstream_gene_variant	.	protein_coding
8213740	C	A	Prupe.1G102600	MODIFIER	intron_variant	.	protein_coding
8213751	A	C	Prupe.1G102700	MODIFIER	downstream_gene_variant	.	protein_coding
8213751	A	C	Prupe.1G102800	MODIFIER	downstream_gene_variant	.	protein_coding
8213751	A	C	Prupe.1G102600	MODIFIER	intron_variant	.	protein_coding
8213775	G	A	Prupe.1G102700	MODIFIER	downstream_gene_variant	.	protein_coding
8213775	G	A	Prupe.1G102800	MODIFIER	downstream_gene_variant	.	protein_coding
8213775	G	A	Prupe.1G102600	MODIFIER	intron_variant	.	protein_coding
8280375	C	T	Prupe.1G103800	MODERATE	missense_variant	p.Ala1146Thr	protein_coding
8280375	C	T	Prupe.1G103800	MODERATE	missense_variant	p.Ala1146Thr	protein_coding
8280375	C	T	Prupe.1G103700	MODIFIER	upstream_gene_variant	.	protein_coding
8281884	G	A	Prupe.1G103800	MODERATE	missense_variant	p.His792Tyr	protein_coding
8281884	G	A	Prupe.1G103800	MODERATE	missense_variant	p.His792Tyr	protein_coding
8281884	G	A	Prupe.1G103700	MODIFIER	upstream_gene_variant	.	protein_coding
8294115	T	C	Prupe.1G103900	MODERATE	missense_variant	p.Gln1928Arg	protein_coding
8294115	T	C	Prupe.1G103900	MODIFIER	downstream_gene_variant	.	protein_coding
8294135	T	C	Prupe.1G103900	LOW	synonymous_variant	p.Arg1921Arg	protein_coding
8294135	T	C	Prupe.1G103900	MODIFIER	downstream_gene_variant	.	protein_coding
8294416	G	A	Prupe.1G103900	MODERATE	missense_variant	p.Ser1864Leu	protein_coding
8294416	G	A	Prupe.1G103900	MODIFIER	downstream_gene_variant	.	protein_coding
8294427	C	T	Prupe.1G103900	LOW	synonymous_variant	p.Val1860Val	protein_coding
8294427	C	T	Prupe.1G103900	MODIFIER	downstream_gene_variant	.	protein_coding
8299864	A	G	Prupe.1G103900	LOW	synonymous_variant	p.Ser1035Ser	protein_coding
8299864	A	G	Prupe.1G103900	LOW	synonymous_variant	p.Ser1035Ser	protein_coding
8299864	A	G	Prupe.1G103900	MODIFIER	3_prime_UTR_variant	.	protein_coding
8322104	A	G	Prupe.1G104000	MODERATE	missense_variant	p.Asn10Ser	protein_coding
8322360	A	T	Prupe.1G104000	MODERATE	missense_variant	p.Ile59Leu	protein_coding
8336216	C	A	Prupe.1G104100	LOW	synonymous_variant	p.Gly682Gly	protein_coding
8336216	C	A	Prupe.1G104100	LOW	synonymous_variant	p.Gly682Gly	protein_coding
8336216	C	A	Prupe.1G104000	MODIFIER	downstream_gene_variant	.	protein_coding
8336225	G	C	Prupe.1G104100	MODERATE	missense_variant	p.Ile679Met	protein_coding
8336225	G	C	Prupe.1G104100	MODERATE	missense_variant	p.Ile679Met	protein_coding
8336225	G	C	Prupe.1G104000	MODIFIER	downstream_gene_variant	.	protein_coding
8336233	A	G	Prupe.1G104100	MODERATE	missense_variant	p.Phe677Leu	protein_coding
8336233	A	G	Prupe.1G104100	MODERATE	missense_variant	p.Phe677Leu	protein_coding
8336233	A	G	Prupe.1G104000	MODIFIER	downstream_gene_variant	.	protein_coding
8336270	C	T	Prupe.1G104100	LOW	synonymous_variant	p.Arg664Arg	protein_coding
8336270	C	T	Prupe.1G104100	LOW	synonymous_variant	p.Arg664Arg	protein_coding
8336270	C	T	Prupe.1G104000	MODIFIER	downstream_gene_variant	.	protein_coding
8388121	C	A	Prupe.1G104300	MODIFIER	intron_variant	.	protein_coding
8388121	C	A	Prupe.1G104300	MODIFIER	intron_variant	.	protein_coding
8388140	G	A	Prupe.1G104300	MODIFIER	intron_variant	.	protein_coding
8388140	G	A	Prupe.1G104300	MODIFIER	intron_variant	.	protein_coding
8388145	A	G	Prupe.1G104300	MODIFIER	intron_variant	.	protein_coding
8388145	A	G	Prupe.1G104300	MODIFIER	intron_variant	.	protein_coding
8388154	T	G	Prupe.1G104300	MODIFIER	intron_variant	.	protein_coding
8388154	T	G	Prupe.1G104300	MODIFIER	intron_variant	.	protein_coding
8388205	T	A	Prupe.1G104300	MODIFIER	intron_variant	.	protein_coding
8388205	T	A	Prupe.1G104300	MODIFIER	intron_variant	.	protein_coding
8388222	T	G	Prupe.1G104300	MODIFIER	intron_variant	.	protein_coding
8388222	T	G	Prupe.1G104300	MODIFIER	intron_variant	.	protein_coding
8388260	T	A	Prupe.1G104300	MODIFIER	intron_variant	.	protein_coding
8388260	T	A	Prupe.1G104300	MODIFIER	intron_variant	.	protein_coding
8388262	G	C	Prupe.1G104300	LOW	splice_region_variant&intron_variant	.	protein_coding
8388262	G	C	Prupe.1G104300	LOW	splice_region_variant&intron_variant	.	protein_coding
8388284	A	T	Prupe.1G104300	MODERATE	missense_variant	p.Cys1171Ser	protein_coding
8388284	A	T	Prupe.1G104300	MODERATE	missense_variant	p.Cys1048Ser	protein_coding
8390177	A	C	Prupe.1G104300	MODERATE	missense_variant	p.Ser677Ala	protein_coding
8390177	A	C	Prupe.1G104300	MODERATE	missense_variant	p.Ser554Ala	protein_coding
8390190	A	G	Prupe.1G104300	LOW	synonymous_variant	p.Asn672Asn	protein_coding
8390190	A	G	Prupe.1G104300	LOW	synonymous_variant	p.Asn549Asn	protein_coding
8390219	T	C	Prupe.1G104300	MODERATE	missense_variant	p.Arg663Gly	protein_coding
8390219	T	C	Prupe.1G104300	MODERATE	missense_variant	p.Arg540Gly	protein_coding
8391568	T	G	Prupe.1G104300	MODIFIER	intron_variant	.	protein_coding
8391568	T	G	Prupe.1G104300	MODIFIER	intron_variant	.	protein_coding
8409926	C	A	Prupe.1G104400	MODIFIER	intron_variant	.	protein_coding
8409926	C	A	Prupe.1G104400	MODIFIER	intron_variant	.	protein_coding
8409926	C	A	Prupe.1G104400	MODIFIER	intron_variant	.	protein_coding
8409945	G	A	Prupe.1G104400	MODIFIER	intron_variant	.	protein_coding
8409945	G	A	Prupe.1G104400	MODIFIER	intron_variant	.	protein_coding
8409945	G	A	Prupe.1G104400	MODIFIER	intron_variant	.	protein_coding
8409950	A	G	Prupe.1G104400	MODIFIER	intron_variant	.	protein_coding
8409950	A	G	Prupe.1G104400	MODIFIER	intron_variant	.	protein_coding
8409950	A	G	Prupe.1G104400	MODIFIER	intron_variant	.	protein_coding
8409959	T	G	Prupe.1G104400	MODIFIER	intron_variant	.	protein_coding
8409959	T	G	Prupe.1G104400	MODIFIER	intron_variant	.	protein_coding
8409959	T	G	Prupe.1G104400	MODIFIER	intron_variant	.	protein_coding
8410010	T	A	Prupe.1G104400	MODIFIER	intron_variant	.	protein_coding
8410010	T	A	Prupe.1G104400	MODIFIER	intron_variant	.	protein_coding
8410010	T	A	Prupe.1G104400	MODIFIER	intron_variant	.	protein_coding
8410027	T	G	Prupe.1G104400	MODIFIER	intron_variant	.	protein_coding
8410027	T	G	Prupe.1G104400	MODIFIER	intron_variant	.	protein_coding
8410027	T	G	Prupe.1G104400	MODIFIER	intron_variant	.	protein_coding
8410065	T	A	Prupe.1G104400	MODIFIER	intron_variant	.	protein_coding
8410065	T	A	Prupe.1G104400	MODIFIER	intron_variant	.	protein_coding
8410065	T	A	Prupe.1G104400	MODIFIER	intron_variant	.	protein_coding
8410067	G	C	Prupe.1G104400	LOW	splice_region_variant&intron_variant	.	protein_coding
8410067	G	C	Prupe.1G104400	LOW	splice_region_variant&intron_variant	.	protein_coding
8410067	G	C	Prupe.1G104400	LOW	splice_region_variant&intron_variant	.	protein_coding
8410089	A	T	Prupe.1G104400	MODERATE	missense_variant	p.Cys1172Ser	protein_coding
8410089	A	T	Prupe.1G104400	MODERATE	missense_variant	p.Cys1172Ser	protein_coding
8410089	A	T	Prupe.1G104400	MODERATE	missense_variant	p.Cys1137Ser	protein_coding
8429771	A	G	Prupe.1G104700	LOW	synonymous_variant	p.Pro147Pro	protein_coding
8429771	A	G	Prupe.1G104700	LOW	synonymous_variant	p.Pro146Pro	protein_coding
8429771	A	G	Prupe.1G104800	MODIFIER	upstream_gene_variant	.	protein_coding
8429771	A	G	Prupe.1G104500	MODIFIER	downstream_gene_variant	.	protein_coding
8429771	A	G	Prupe.1G104600	MODIFIER	downstream_gene_variant	.	protein_coding
8429771	A	G	Prupe.1G104700	MODIFIER	intron_variant	.	protein_coding
8432399	C	T	Prupe.1G104700	MODIFIER	upstream_gene_variant	.	protein_coding
8432399	C	T	Prupe.1G104600	MODIFIER	downstream_gene_variant	.	protein_coding
8432399	C	T	Prupe.1G104800	MODIFIER	intron_variant	.	protein_coding
8432452	G	A	Prupe.1G104700	MODIFIER	upstream_gene_variant	.	protein_coding
8432452	G	A	Prupe.1G104600	MODIFIER	downstream_gene_variant	.	protein_coding
8432452	G	A	Prupe.1G104800	MODIFIER	intron_variant	.	protein_coding
8476010	G	A	Prupe.1G105400	LOW	synonymous_variant	p.Ala480Ala	protein_coding
8476010	G	A	Prupe.1G105500	MODIFIER	upstream_gene_variant	.	protein_coding
8476010	G	A	Prupe.1G105200	MODIFIER	downstream_gene_variant	.	protein_coding
8476010	G	A	Prupe.1G105300	MODIFIER	downstream_gene_variant	.	protein_coding
8476064	C	T	Prupe.1G105400	LOW	synonymous_variant	p.Thr462Thr	protein_coding
8476064	C	T	Prupe.1G105500	MODIFIER	upstream_gene_variant	.	protein_coding
8476064	C	T	Prupe.1G105600	MODIFIER	upstream_gene_variant	.	protein_coding
8476064	C	T	Prupe.1G105200	MODIFIER	downstream_gene_variant	.	protein_coding
8476064	C	T	Prupe.1G105300	MODIFIER	downstream_gene_variant	.	protein_coding
8476845	T	G	Prupe.1G105400	LOW	synonymous_variant	p.Ile286Ile	protein_coding
8476845	T	G	Prupe.1G105500	MODIFIER	upstream_gene_variant	.	protein_coding
8476845	T	G	Prupe.1G105600	MODIFIER	upstream_gene_variant	.	protein_coding
8476845	T	G	Prupe.1G105200	MODIFIER	downstream_gene_variant	.	protein_coding
8476845	T	G	Prupe.1G105300	MODIFIER	downstream_gene_variant	.	protein_coding
8476875	A	G	Prupe.1G105400	LOW	synonymous_variant	p.Tyr276Tyr	protein_coding
8476875	A	G	Prupe.1G105500	MODIFIER	upstream_gene_variant	.	protein_coding
8476875	A	G	Prupe.1G105600	MODIFIER	upstream_gene_variant	.	protein_coding
8476875	A	G	Prupe.1G105200	MODIFIER	downstream_gene_variant	.	protein_coding
8476875	A	G	Prupe.1G105300	MODIFIER	downstream_gene_variant	.	protein_coding
8484386	A	G	Prupe.1G105600	LOW	synonymous_variant	p.Pro679Pro	protein_coding
8484386	A	G	Prupe.1G105600	LOW	synonymous_variant	p.Pro658Pro	protein_coding
8484386	A	G	Prupe.1G105700	MODIFIER	upstream_gene_variant	.	protein_coding
8484386	A	G	Prupe.1G105500	MODIFIER	downstream_gene_variant	.	protein_coding
8484458	A	G	Prupe.1G105700	MODIFIER	upstream_gene_variant	.	protein_coding
8484458	A	G	Prupe.1G105500	MODIFIER	downstream_gene_variant	.	protein_coding
8484458	A	G	Prupe.1G105600	MODIFIER	intron_variant	.	protein_coding
8484458	A	G	Prupe.1G105600	MODIFIER	intron_variant	.	protein_coding
8484461	G	T	Prupe.1G105700	MODIFIER	upstream_gene_variant	.	protein_coding
8484461	G	T	Prupe.1G105500	MODIFIER	downstream_gene_variant	.	protein_coding
8484461	G	T	Prupe.1G105600	MODIFIER	intron_variant	.	protein_coding
8484461	G	T	Prupe.1G105600	MODIFIER	intron_variant	.	protein_coding
8492759	C	T	Prupe.1G105800	MODERATE	missense_variant	p.Cys7Tyr	protein_coding
8492759	C	T	Prupe.1G105800	MODERATE	missense_variant	p.Cys7Tyr	protein_coding
8492759	C	T	Prupe.1G105900	MODIFIER	upstream_gene_variant	.	protein_coding
8492759	C	T	Prupe.1G105700	MODIFIER	downstream_gene_variant	.	protein_coding
8493145	G	C	Prupe.1G105800	MODIFIER	upstream_gene_variant	.	protein_coding
8493145	G	C	Prupe.1G105900	MODIFIER	upstream_gene_variant	.	protein_coding
8493145	G	C	Prupe.1G105700	MODIFIER	downstream_gene_variant	.	protein_coding
8493145	G	C	Prupe.1G105800-Prupe.1G105900	MODIFIER	intergenic_region	.	.
8509136	G	A	Prupe.1G106200	LOW	synonymous_variant	p.Ser279Ser	protein_coding
8509136	G	A	Prupe.1G106100	MODIFIER	upstream_gene_variant	.	protein_coding
8509136	G	A	Prupe.1G106000	MODIFIER	downstream_gene_variant	.	protein_coding
8552068	T	C	Prupe.1G106600	MODERATE	missense_variant	p.Ile301Thr	protein_coding
8552068	T	C	Prupe.1G106500	MODIFIER	downstream_gene_variant	.	protein_coding
8552117	T	C	Prupe.1G106600	LOW	synonymous_variant	p.Pro317Pro	protein_coding
8552117	T	C	Prupe.1G106500	MODIFIER	downstream_gene_variant	.	protein_coding
8552900	G	A	Prupe.1G106600	LOW	synonymous_variant	p.Gly460Gly	protein_coding
8552900	G	A	Prupe.1G106500	MODIFIER	downstream_gene_variant	.	protein_coding
8552981	C	G	Prupe.1G106500	MODIFIER	downstream_gene_variant	.	protein_coding
8552981	C	G	Prupe.1G106600	MODIFIER	intron_variant	.	protein_coding
8552995	C	G	Prupe.1G106500	MODIFIER	downstream_gene_variant	.	protein_coding
8552995	C	G	Prupe.1G106600	MODIFIER	intron_variant	.	protein_coding
8568781	G	A	Prupe.1G106800	MODERATE	missense_variant	p.Gly277Ser	protein_coding
8568781	G	A	Prupe.1G106700	MODIFIER	downstream_gene_variant	.	protein_coding
8568796	A	G	Prupe.1G106800	MODERATE	missense_variant	p.Thr282Ala	protein_coding
8568796	A	G	Prupe.1G106700	MODIFIER	downstream_gene_variant	.	protein_coding
8568890	G	A	Prupe.1G106800	LOW	splice_region_variant&intron_variant	.	protein_coding
8568890	G	A	Prupe.1G106700	MODIFIER	downstream_gene_variant	.	protein_coding
8568916	A	G	Prupe.1G106800	LOW	synonymous_variant	p.Arg290Arg	protein_coding
8568916	A	G	Prupe.1G106700	MODIFIER	downstream_gene_variant	.	protein_coding
8568925	A	G	Prupe.1G106800	LOW	synonymous_variant	p.Lys293Lys	protein_coding
8568925	A	G	Prupe.1G106700	MODIFIER	downstream_gene_variant	.	protein_coding
8569012	A	T	Prupe.1G106700	MODIFIER	downstream_gene_variant	.	protein_coding
8569012	A	T	Prupe.1G106800	MODIFIER	intron_variant	.	protein_coding
8569189	T	A	Prupe.1G106800	LOW	synonymous_variant	p.Gly329Gly	protein_coding
8569189	T	A	Prupe.1G106700	MODIFIER	downstream_gene_variant	.	protein_coding
8572911	C	A	Prupe.1G106800	MODERATE	missense_variant	p.Thr1078Asn	protein_coding
8572911	C	A	Prupe.1G106900	MODIFIER	downstream_gene_variant	.	protein_coding
8572931	G	T	Prupe.1G106800	MODERATE	missense_variant	p.Gly1085Cys	protein_coding
8572931	G	T	Prupe.1G106900	MODIFIER	downstream_gene_variant	.	protein_coding
8572984	C	T	Prupe.1G106800	LOW	splice_region_variant&intron_variant	.	protein_coding
8572984	C	T	Prupe.1G106900	MODIFIER	downstream_gene_variant	.	protein_coding
8573026	C	T	Prupe.1G106900	MODIFIER	downstream_gene_variant	.	protein_coding
8573026	C	T	Prupe.1G106800	MODIFIER	intron_variant	.	protein_coding
8573031	G	A	Prupe.1G106900	MODIFIER	downstream_gene_variant	.	protein_coding
8573031	G	A	Prupe.1G106800	MODIFIER	intron_variant	.	protein_coding
8573035	G	A	Prupe.1G106900	MODIFIER	downstream_gene_variant	.	protein_coding
8573035	G	A	Prupe.1G106800	MODIFIER	intron_variant	.	protein_coding
8573041	C	A	Prupe.1G106900	MODIFIER	downstream_gene_variant	.	protein_coding
8573041	C	A	Prupe.1G106800	MODIFIER	intron_variant	.	protein_coding
8573053	A	G	Prupe.1G106900	MODIFIER	downstream_gene_variant	.	protein_coding
8573053	A	G	Prupe.1G106800	MODIFIER	intron_variant	.	protein_coding
8573080	G	A	Prupe.1G106900	MODIFIER	downstream_gene_variant	.	protein_coding
8573080	G	A	Prupe.1G106800	MODIFIER	intron_variant	.	protein_coding
8578708	G	T	Prupe.1G106900	LOW	synonymous_variant	p.Arg1242Arg	protein_coding
8578708	G	T	Prupe.1G106900	LOW	synonymous_variant	p.Arg1242Arg	protein_coding
8578708	G	T	Prupe.1G106800	MODIFIER	downstream_gene_variant	.	protein_coding
8584743	G	A	Prupe.1G106900	LOW	synonymous_variant	p.Ser84Ser	protein_coding
8584743	G	A	Prupe.1G106900	LOW	synonymous_variant	p.Ser84Ser	protein_coding
8584784	C	T	Prupe.1G106900	MODERATE	missense_variant	p.Gly71Arg	protein_coding
8584784	C	T	Prupe.1G106900	MODERATE	missense_variant	p.Gly71Arg	protein_coding
8584874	A	G	Prupe.1G106900	MODERATE	missense_variant	p.Phe41Leu	protein_coding
8584874	A	G	Prupe.1G106900	MODERATE	missense_variant	p.Phe41Leu	protein_coding
8584905	C	T	Prupe.1G106900	LOW	synonymous_variant	p.Arg30Arg	protein_coding
8584905	C	T	Prupe.1G106900	LOW	synonymous_variant	p.Arg30Arg	protein_coding
8665249	G	C	Prupe.1G108200	MODERATE	missense_variant	p.Arg528Gly	protein_coding
8665249	G	C	Prupe.1G108300	MODIFIER	downstream_gene_variant	.	protein_coding
8665460	T	C	Prupe.1G108200	LOW	synonymous_variant	p.Leu457Leu	protein_coding
8665460	T	C	Prupe.1G108300	MODIFIER	downstream_gene_variant	.	protein_coding
8665831	T	A	Prupe.1G108200	MODERATE	missense_variant	p.Thr334Ser	protein_coding
8665831	T	A	Prupe.1G108300	MODIFIER	downstream_gene_variant	.	protein_coding
8682154	T	C	Prupe.1G108600	MODIFIER	upstream_gene_variant	.	protein_coding
8682154	T	C	Prupe.1G108700	MODIFIER	upstream_gene_variant	.	protein_coding
8682154	T	C	Prupe.1G108500	MODIFIER	intron_variant	.	protein_coding
8682349	A	G	Prupe.1G108600	MODIFIER	upstream_gene_variant	.	protein_coding
8682349	A	G	Prupe.1G108700	MODIFIER	upstream_gene_variant	.	protein_coding
8682349	A	G	Prupe.1G108500	MODIFIER	intron_variant	.	protein_coding
8682375	C	T	Prupe.1G108600	MODIFIER	upstream_gene_variant	.	protein_coding
8682375	C	T	Prupe.1G108700	MODIFIER	upstream_gene_variant	.	protein_coding
8682375	C	T	Prupe.1G108500	MODIFIER	intron_variant	.	protein_coding
8691669	C	A	Prupe.1G108800	MODIFIER	downstream_gene_variant	.	protein_coding
8691669	C	A	Prupe.1G108700	MODIFIER	intron_variant	.	protein_coding
8691669	C	A	Prupe.1G108700	MODIFIER	intron_variant	.	protein_coding
8691669	C	A	Prupe.1G108700	MODIFIER	intron_variant	.	protein_coding
8691671	T	C	Prupe.1G108800	MODIFIER	downstream_gene_variant	.	protein_coding
8691671	T	C	Prupe.1G108700	MODIFIER	intron_variant	.	protein_coding
8691671	T	C	Prupe.1G108700	MODIFIER	intron_variant	.	protein_coding
8691671	T	C	Prupe.1G108700	MODIFIER	intron_variant	.	protein_coding
8691902	C	T	Prupe.1G108700	LOW	synonymous_variant	p.Asn510Asn	protein_coding
8691902	C	T	Prupe.1G108700	LOW	synonymous_variant	p.Asn496Asn	protein_coding
8691902	C	T	Prupe.1G108700	LOW	synonymous_variant	p.Asn456Asn	protein_coding
8691902	C	T	Prupe.1G108700	LOW	synonymous_variant	p.Asn496Asn	protein_coding
8691902	C	T	Prupe.1G108800	MODIFIER	downstream_gene_variant	.	protein_coding
8721632	G	A	Prupe.1G109100	LOW	synonymous_variant	p.Pro75Pro	protein_coding
8721632	G	A	Prupe.1G109000	MODIFIER	upstream_gene_variant	.	protein_coding
8748330	C	T	Prupe.1G109600	MODERATE	missense_variant	p.Ala255Val	protein_coding
8748353	A	G	Prupe.1G109600	MODERATE	missense_variant	p.Thr263Ala	protein_coding
8748367	C	T	Prupe.1G109600	LOW	synonymous_variant	p.Ser267Ser	protein_coding
8748368	A	G	Prupe.1G109600	MODERATE	missense_variant	p.Ile268Val	protein_coding
8751610	G	A	Prupe.1G109600	LOW	splice_region_variant&intron_variant	.	protein_coding
8751610	G	A	Prupe.1G109700	MODIFIER	upstream_gene_variant	.	protein_coding
8751628	T	A	Prupe.1G109700	MODIFIER	upstream_gene_variant	.	protein_coding
8751628	T	A	Prupe.1G109600	MODIFIER	intron_variant	.	protein_coding
8774537	A	G	Prupe.1G109900	LOW	synonymous_variant	p.Ala607Ala	protein_coding
8774537	A	G	Prupe.1G109900	LOW	synonymous_variant	p.Ala607Ala	protein_coding
8774537	A	G	Prupe.1G109900	LOW	synonymous_variant	p.Ala483Ala	protein_coding
8774537	A	G	Prupe.1G110000	MODIFIER	downstream_gene_variant	.	protein_coding
8774537	A	G	Prupe.1G110100	MODIFIER	downstream_gene_variant	.	protein_coding
8774594	A	C	Prupe.1G110000	MODIFIER	downstream_gene_variant	.	protein_coding
8774594	A	C	Prupe.1G110100	MODIFIER	downstream_gene_variant	.	protein_coding
8774594	A	C	Prupe.1G109900	MODIFIER	intron_variant	.	protein_coding
8774594	A	C	Prupe.1G109900	MODIFIER	intron_variant	.	protein_coding
8774594	A	C	Prupe.1G109900	MODIFIER	intron_variant	.	protein_coding
8774854	A	G	Prupe.1G109900	LOW	synonymous_variant	p.Arg618Arg	protein_coding
8774854	A	G	Prupe.1G109900	LOW	synonymous_variant	p.Arg618Arg	protein_coding
8774854	A	G	Prupe.1G109900	LOW	synonymous_variant	p.Arg494Arg	protein_coding
8774854	A	G	Prupe.1G110000	MODIFIER	downstream_gene_variant	.	protein_coding
8774854	A	G	Prupe.1G110100	MODIFIER	downstream_gene_variant	.	protein_coding
8793495	A	G	Prupe.1G110200	MODIFIER	intron_variant	.	protein_coding
8793552	A	C	Prupe.1G110200	MODIFIER	intron_variant	.	protein_coding
8822433	C	A	Prupe.1G110200	LOW	synonymous_variant	p.Gly3988Gly	protein_coding
8822433	C	A	Prupe.1G110200	LOW	synonymous_variant	p.Gly3619Gly	protein_coding
8822433	C	A	Prupe.1G110300	MODIFIER	upstream_gene_variant	.	protein_coding
8822433	C	A	Prupe.1G110200	MODIFIER	downstream_gene_variant	.	protein_coding
8822614	A	C	Prupe.1G110200	MODERATE	missense_variant&splice_region_variant	p.Lys3680Gln	protein_coding
8822614	A	C	Prupe.1G110200	LOW	splice_region_variant&intron_variant	.	protein_coding
8822614	A	C	Prupe.1G110300	MODIFIER	upstream_gene_variant	.	protein_coding
8822614	A	C	Prupe.1G110200	MODIFIER	downstream_gene_variant	.	protein_coding
8822627	G	A	Prupe.1G110300	MODIFIER	upstream_gene_variant	.	protein_coding
8822627	G	A	Prupe.1G110200	MODIFIER	downstream_gene_variant	.	protein_coding
8822627	G	A	Prupe.1G110200	MODIFIER	intron_variant	.	protein_coding
8822627	G	A	Prupe.1G110200	MODIFIER	intron_variant	.	protein_coding
8822630	G	T	Prupe.1G110300	MODIFIER	upstream_gene_variant	.	protein_coding
8822630	G	T	Prupe.1G110200	MODIFIER	downstream_gene_variant	.	protein_coding
8822630	G	T	Prupe.1G110200	MODIFIER	intron_variant	.	protein_coding
8822630	G	T	Prupe.1G110200	MODIFIER	intron_variant	.	protein_coding
8838664	T	C	Prupe.1G110500	MODIFIER	upstream_gene_variant	.	protein_coding
8838664	T	C	Prupe.1G110400	MODIFIER	downstream_gene_variant	.	protein_coding
8838664	T	C	Prupe.1G110400-Prupe.1G110500	MODIFIER	intergenic_region	.	.
8838713	C	T	Prupe.1G110500	MODIFIER	upstream_gene_variant	.	protein_coding
8838713	C	T	Prupe.1G110400	MODIFIER	downstream_gene_variant	.	protein_coding
8838713	C	T	Prupe.1G110400-Prupe.1G110500	MODIFIER	intergenic_region	.	.
8838714	G	T	Prupe.1G110500	MODIFIER	upstream_gene_variant	.	protein_coding
8838714	G	T	Prupe.1G110400	MODIFIER	downstream_gene_variant	.	protein_coding
8838714	G	T	Prupe.1G110400-Prupe.1G110500	MODIFIER	intergenic_region	.	.
8842778	G	T	Prupe.1G110500	LOW	synonymous_variant	p.Thr491Thr	protein_coding
8842778	G	T	Prupe.1G110600	MODIFIER	upstream_gene_variant	.	protein_coding
8842778	G	T	Prupe.1G110700	MODIFIER	upstream_gene_variant	.	protein_coding
8845758	A	G	Prupe.1G110700	MODIFIER	upstream_gene_variant	.	protein_coding
8845758	A	G	Prupe.1G110500	MODIFIER	downstream_gene_variant	.	protein_coding
8845758	A	G	Prupe.1G110600	MODIFIER	intron_variant	.	protein_coding
8845832	C	T	Prupe.1G110700	MODIFIER	upstream_gene_variant	.	protein_coding
8845832	C	T	Prupe.1G110500	MODIFIER	downstream_gene_variant	.	protein_coding
8845832	C	T	Prupe.1G110600	MODIFIER	intron_variant	.	protein_coding
8845888	T	C	Prupe.1G110700	MODIFIER	upstream_gene_variant	.	protein_coding
8845888	T	C	Prupe.1G110500	MODIFIER	downstream_gene_variant	.	protein_coding
8845888	T	C	Prupe.1G110600	MODIFIER	intron_variant	.	protein_coding
8845940	C	G	Prupe.1G110700	MODIFIER	upstream_gene_variant	.	protein_coding
8845940	C	G	Prupe.1G110500	MODIFIER	downstream_gene_variant	.	protein_coding
8845940	C	G	Prupe.1G110600	MODIFIER	intron_variant	.	protein_coding
8846097	T	C	Prupe.1G110600	MODIFIER	3_prime_UTR_variant	.	protein_coding
8846097	T	C	Prupe.1G110700	MODIFIER	upstream_gene_variant	.	protein_coding
8846097	T	C	Prupe.1G110500	MODIFIER	downstream_gene_variant	.	protein_coding
8884049	A	G	Prupe.1G111500	LOW	synonymous_variant	p.Asn845Asn	protein_coding
8884049	A	G	Prupe.1G111400	MODIFIER	downstream_gene_variant	.	protein_coding
8884060	G	C	Prupe.1G111500	MODERATE	missense_variant	p.Leu842Val	protein_coding
8884060	G	C	Prupe.1G111400	MODIFIER	downstream_gene_variant	.	protein_coding
8891039	T	G	Prupe.1G111600	LOW	splice_region_variant&intron_variant	.	protein_coding
8891039	T	G	Prupe.1G111500	MODIFIER	upstream_gene_variant	.	protein_coding
8989782	G	T	Prupe.1G112900	MODIFIER	intron_variant	.	protein_coding
8989782	G	T	Prupe.1G112900	MODIFIER	intron_variant	.	protein_coding
8989804	T	C	Prupe.1G112900	MODIFIER	intron_variant	.	protein_coding
8989804	T	C	Prupe.1G112900	MODIFIER	intron_variant	.	protein_coding
9074265	G	T	Prupe.1G114500	MODERATE	missense_variant	p.Ala166Asp	protein_coding
9074265	G	T	Prupe.1G114600	MODIFIER	upstream_gene_variant	.	protein_coding
9085734	G	A	Prupe.1G114700	MODERATE	missense_variant	p.Thr264Met	protein_coding
9085734	G	A	Prupe.1G114600	MODIFIER	3_prime_UTR_variant	.	protein_coding
9085734	G	A	Prupe.1G114800	MODIFIER	downstream_gene_variant	.	protein_coding
9085734	G	A	Prupe.1G114600	MODIFIER	downstream_gene_variant	.	protein_coding
9085742	G	A	Prupe.1G114700	LOW	synonymous_variant	p.Thr261Thr	protein_coding
9085742	G	A	Prupe.1G114600	MODIFIER	3_prime_UTR_variant	.	protein_coding
9085742	G	A	Prupe.1G114800	MODIFIER	downstream_gene_variant	.	protein_coding
9085742	G	A	Prupe.1G114600	MODIFIER	downstream_gene_variant	.	protein_coding
9085833	G	C	Prupe.1G114700	MODERATE	missense_variant	p.Thr231Ser	protein_coding
9085833	G	C	Prupe.1G114600	MODIFIER	3_prime_UTR_variant	.	protein_coding
9085833	G	C	Prupe.1G114800	MODIFIER	downstream_gene_variant	.	protein_coding
9085833	G	C	Prupe.1G114600	MODIFIER	downstream_gene_variant	.	protein_coding
9085834	T	C	Prupe.1G114700	MODERATE	missense_variant	p.Thr231Ala	protein_coding
9085834	T	C	Prupe.1G114600	MODIFIER	3_prime_UTR_variant	.	protein_coding
9085834	T	C	Prupe.1G114800	MODIFIER	downstream_gene_variant	.	protein_coding
9085834	T	C	Prupe.1G114600	MODIFIER	downstream_gene_variant	.	protein_coding
9086160	A	C	Prupe.1G114700	MODERATE	missense_variant&splice_region_variant	p.Ser152Ala	protein_coding
9086160	A	C	Prupe.1G114600	MODIFIER	downstream_gene_variant	.	protein_coding
9086160	A	C	Prupe.1G114800	MODIFIER	downstream_gene_variant	.	protein_coding
9086172	A	T	Prupe.1G114600	MODIFIER	downstream_gene_variant	.	protein_coding
9086172	A	T	Prupe.1G114800	MODIFIER	downstream_gene_variant	.	protein_coding
9086172	A	T	Prupe.1G114700	MODIFIER	intron_variant	.	protein_coding
9086253	A	G	Prupe.1G114700	LOW	synonymous_variant	p.Val150Val	protein_coding
9086253	A	G	Prupe.1G114600	MODIFIER	downstream_gene_variant	.	protein_coding
9086253	A	G	Prupe.1G114800	MODIFIER	downstream_gene_variant	.	protein_coding
9086337	C	T	Prupe.1G114700	LOW	synonymous_variant	p.Ala122Ala	protein_coding
9086337	C	T	Prupe.1G114600	MODIFIER	downstream_gene_variant	.	protein_coding
9086337	C	T	Prupe.1G114800	MODIFIER	downstream_gene_variant	.	protein_coding
9151223	G	T	Prupe.1G115900	MODIFIER	3_prime_UTR_variant	.	protein_coding
9151223	G	T	Prupe.1G115800	MODIFIER	upstream_gene_variant	.	protein_coding
9151223	G	T	Prupe.1G116000	MODIFIER	downstream_gene_variant	.	protein_coding
9151415	T	C	Prupe.1G115900	LOW	synonymous_variant	p.Lys381Lys	protein_coding
9151415	T	C	Prupe.1G115800	MODIFIER	upstream_gene_variant	.	protein_coding
9151415	T	C	Prupe.1G116000	MODIFIER	downstream_gene_variant	.	protein_coding
9151415	T	C	Prupe.1G116100	MODIFIER	downstream_gene_variant	.	protein_coding
9151436	G	C	Prupe.1G115900	MODERATE	missense_variant	p.Asn374Lys	protein_coding
9151436	G	C	Prupe.1G115800	MODIFIER	upstream_gene_variant	.	protein_coding
9151436	G	C	Prupe.1G116000	MODIFIER	downstream_gene_variant	.	protein_coding
9151436	G	C	Prupe.1G116100	MODIFIER	downstream_gene_variant	.	protein_coding
9151541	A	C	Prupe.1G115900	LOW	synonymous_variant	p.Gly339Gly	protein_coding
9151541	A	C	Prupe.1G115800	MODIFIER	upstream_gene_variant	.	protein_coding
9151541	A	C	Prupe.1G116000	MODIFIER	downstream_gene_variant	.	protein_coding
9151541	A	C	Prupe.1G116100	MODIFIER	downstream_gene_variant	.	protein_coding
9157110	C	T	Prupe.1G116100	LOW	synonymous_variant	p.Glu239Glu	protein_coding
9157110	C	T	Prupe.1G116100	LOW	synonymous_variant	p.Glu237Glu	protein_coding
9157110	C	T	Prupe.1G116100	LOW	synonymous_variant	p.Glu237Glu	protein_coding
9157110	C	T	Prupe.1G115900	MODIFIER	upstream_gene_variant	.	protein_coding
9157110	C	T	Prupe.1G116000	MODIFIER	upstream_gene_variant	.	protein_coding
9157110	C	T	Prupe.1G116200	MODIFIER	downstream_gene_variant	.	protein_coding
9157167	C	T	Prupe.1G116100	LOW	synonymous_variant	p.Ala220Ala	protein_coding
9157167	C	T	Prupe.1G116100	LOW	synonymous_variant	p.Ala218Ala	protein_coding
9157167	C	T	Prupe.1G116100	LOW	synonymous_variant	p.Ala218Ala	protein_coding
9157167	C	T	Prupe.1G115900	MODIFIER	upstream_gene_variant	.	protein_coding
9157167	C	T	Prupe.1G116000	MODIFIER	upstream_gene_variant	.	protein_coding
9157167	C	T	Prupe.1G116200	MODIFIER	downstream_gene_variant	.	protein_coding
9157253	G	C	Prupe.1G115900	MODIFIER	upstream_gene_variant	.	protein_coding
9157253	G	C	Prupe.1G116000	MODIFIER	upstream_gene_variant	.	protein_coding
9157253	G	C	Prupe.1G116200	MODIFIER	downstream_gene_variant	.	protein_coding
9157253	G	C	Prupe.1G116100	MODIFIER	intron_variant	.	protein_coding
9157253	G	C	Prupe.1G116100	MODIFIER	intron_variant	.	protein_coding
9225930	A	C	Prupe.1G117000	MODERATE	missense_variant	p.Asp246Glu	protein_coding
9225930	A	C	Prupe.1G117100	MODIFIER	downstream_gene_variant	.	protein_coding
9225930	A	C	Prupe.1G117200	MODIFIER	downstream_gene_variant	.	protein_coding
9225996	T	A	Prupe.1G117000	MODERATE	missense_variant	p.Glu224Asp	protein_coding
9225996	T	A	Prupe.1G117100	MODIFIER	downstream_gene_variant	.	protein_coding
9225996	T	A	Prupe.1G117200	MODIFIER	downstream_gene_variant	.	protein_coding
9227771	A	G	Prupe.1G117000	MODIFIER	upstream_gene_variant	.	protein_coding
9227771	A	G	Prupe.1G117200	MODIFIER	downstream_gene_variant	.	protein_coding
9227771	A	G	Prupe.1G117000-Prupe.1G117200	MODIFIER	intergenic_region	.	.
9227772	T	A	Prupe.1G117000	MODIFIER	upstream_gene_variant	.	protein_coding
9227772	T	A	Prupe.1G117200	MODIFIER	downstream_gene_variant	.	protein_coding
9227772	T	A	Prupe.1G117000-Prupe.1G117200	MODIFIER	intergenic_region	.	.
9227813	G	T	Prupe.1G117200	MODIFIER	3_prime_UTR_variant	.	protein_coding
9227813	G	T	Prupe.1G117200	MODIFIER	3_prime_UTR_variant	.	protein_coding
9227813	G	T	Prupe.1G117000	MODIFIER	upstream_gene_variant	.	protein_coding
9227826	G	A	Prupe.1G117200	MODIFIER	3_prime_UTR_variant	.	protein_coding
9227826	G	A	Prupe.1G117200	MODIFIER	3_prime_UTR_variant	.	protein_coding
9227826	G	A	Prupe.1G117000	MODIFIER	upstream_gene_variant	.	protein_coding
9227832	A	G	Prupe.1G117200	MODIFIER	3_prime_UTR_variant	.	protein_coding
9227832	A	G	Prupe.1G117200	MODIFIER	3_prime_UTR_variant	.	protein_coding
9227832	A	G	Prupe.1G117000	MODIFIER	upstream_gene_variant	.	protein_coding
9231901	C	T	Prupe.1G117200	LOW	splice_region_variant&intron_variant	.	protein_coding
9231901	C	T	Prupe.1G117200	LOW	splice_region_variant&intron_variant	.	protein_coding
9231901	C	T	Prupe.1G117000	MODIFIER	upstream_gene_variant	.	protein_coding
9262953	C	T	Prupe.1G117700	MODERATE	missense_variant	p.Pro302Ser	protein_coding
9262953	C	T	Prupe.1G117600	MODIFIER	downstream_gene_variant	.	protein_coding
9263212	C	T	Prupe.1G117700	MODERATE	missense_variant	p.Ser388Leu	protein_coding
9263212	C	T	Prupe.1G117600	MODIFIER	downstream_gene_variant	.	protein_coding
9276705	G	A	Prupe.1G117900	LOW	synonymous_variant	p.Ser1096Ser	protein_coding
9276705	G	A	Prupe.1G117800	MODIFIER	upstream_gene_variant	.	protein_coding
9276979	G	A	Prupe.1G117900	MODERATE	missense_variant	p.Pro1005Leu	protein_coding
9276979	G	A	Prupe.1G117800	MODIFIER	upstream_gene_variant	.	protein_coding
9294317	G	C	Prupe.1G118200	MODERATE	missense_variant	p.Gln88Glu	protein_coding
9294317	G	C	Prupe.1G118100	MODIFIER	upstream_gene_variant	.	protein_coding
9294317	G	C	Prupe.1G118400	MODIFIER	upstream_gene_variant	.	protein_coding
9294317	G	C	Prupe.1G118300	MODIFIER	downstream_gene_variant	.	protein_coding
9294340	A	T	Prupe.1G118200	MODERATE	missense_variant	p.Ile80Asn	protein_coding
9294340	A	T	Prupe.1G118100	MODIFIER	upstream_gene_variant	.	protein_coding
9294340	A	T	Prupe.1G118400	MODIFIER	upstream_gene_variant	.	protein_coding
9294340	A	T	Prupe.1G118300	MODIFIER	downstream_gene_variant	.	protein_coding
9294552	C	G	Prupe.1G118200	LOW	synonymous_variant	p.Ala9Ala	protein_coding
9294552	C	G	Prupe.1G118100	MODIFIER	upstream_gene_variant	.	protein_coding
9294552	C	G	Prupe.1G118400	MODIFIER	upstream_gene_variant	.	protein_coding
9294552	C	G	Prupe.1G118300	MODIFIER	downstream_gene_variant	.	protein_coding
9294603	T	A	Prupe.1G118100	MODIFIER	upstream_gene_variant	.	protein_coding
9294603	T	A	Prupe.1G118200	MODIFIER	upstream_gene_variant	.	protein_coding
9294603	T	A	Prupe.1G118400	MODIFIER	upstream_gene_variant	.	protein_coding
9294603	T	A	Prupe.1G118300	MODIFIER	downstream_gene_variant	.	protein_coding
9294603	T	A	Prupe.1G118200-Prupe.1G118300	MODIFIER	intergenic_region	.	.
9319810	C	T	Prupe.1G119000	LOW	synonymous_variant	p.Ala243Ala	protein_coding
9319810	C	T	Prupe.1G119000	LOW	synonymous_variant	p.Ala166Ala	protein_coding
9319810	C	T	Prupe.1G119100	MODIFIER	upstream_gene_variant	.	protein_coding
9319810	C	T	Prupe.1G118800	MODIFIER	downstream_gene_variant	.	protein_coding
9319810	C	T	Prupe.1G118900	MODIFIER	downstream_gene_variant	.	protein_coding
9319826	G	C	Prupe.1G119000	MODERATE	missense_variant	p.Pro238Arg	protein_coding
9319826	G	C	Prupe.1G119000	MODERATE	missense_variant	p.Pro161Arg	protein_coding
9319826	G	C	Prupe.1G119100	MODIFIER	upstream_gene_variant	.	protein_coding
9319826	G	C	Prupe.1G118800	MODIFIER	downstream_gene_variant	.	protein_coding
9319826	G	C	Prupe.1G118900	MODIFIER	downstream_gene_variant	.	protein_coding
9327505	C	T	Prupe.1G119200	LOW	synonymous_variant	p.Asn288Asn	protein_coding
9327505	C	T	Prupe.1G119100	MODIFIER	downstream_gene_variant	.	protein_coding
9327505	C	T	Prupe.1G119300	MODIFIER	downstream_gene_variant	.	protein_coding
9327631	A	G	Prupe.1G119200	LOW	synonymous_variant	p.Arg330Arg	protein_coding
9327631	A	G	Prupe.1G119100	MODIFIER	downstream_gene_variant	.	protein_coding
9327631	A	G	Prupe.1G119300	MODIFIER	downstream_gene_variant	.	protein_coding
9327697	T	G	Prupe.1G119200	LOW	synonymous_variant	p.Ala352Ala	protein_coding
9327697	T	G	Prupe.1G119100	MODIFIER	downstream_gene_variant	.	protein_coding
9327697	T	G	Prupe.1G119300	MODIFIER	downstream_gene_variant	.	protein_coding
9349200	C	A	Prupe.1G119700	MODIFIER	intron_variant	.	protein_coding
9561660	G	C	Prupe.1G121800	MODIFIER	3_prime_UTR_variant	.	protein_coding
9561660	G	C	Prupe.1G121600	MODIFIER	downstream_gene_variant	.	protein_coding
9561660	G	C	Prupe.1G121700	MODIFIER	downstream_gene_variant	.	protein_coding
9561706	G	C	Prupe.1G121800	MODIFIER	3_prime_UTR_variant	.	protein_coding
9561706	G	C	Prupe.1G121600	MODIFIER	downstream_gene_variant	.	protein_coding
9561706	G	C	Prupe.1G121700	MODIFIER	downstream_gene_variant	.	protein_coding
9579518	G	A	Prupe.1G121900	LOW	synonymous_variant	p.Leu751Leu	protein_coding
9579518	G	A	Prupe.1G121900	LOW	synonymous_variant	p.Leu731Leu	protein_coding
9579518	G	A	Prupe.1G122000	MODIFIER	downstream_gene_variant	.	protein_coding
9585335	C	T	Prupe.1G121900	MODIFIER	downstream_gene_variant	.	protein_coding
9585335	C	T	Prupe.1G122100	MODIFIER	downstream_gene_variant	.	protein_coding
9585335	C	T	Prupe.1G122000	MODIFIER	intron_variant	.	protein_coding
9585363	T	C	Prupe.1G121900	MODIFIER	downstream_gene_variant	.	protein_coding
9585363	T	C	Prupe.1G122100	MODIFIER	downstream_gene_variant	.	protein_coding
9585363	T	C	Prupe.1G122000	MODIFIER	intron_variant	.	protein_coding
9591185	T	A	Prupe.1G122100	MODIFIER	upstream_gene_variant	.	protein_coding
9591185	T	A	Prupe.1G122300	MODIFIER	downstream_gene_variant	.	protein_coding
9591185	T	A	Prupe.1G122200	MODIFIER	intron_variant	.	protein_coding
9591252	T	A	Prupe.1G122100	MODIFIER	upstream_gene_variant	.	protein_coding
9591252	T	A	Prupe.1G122300	MODIFIER	downstream_gene_variant	.	protein_coding
9591252	T	A	Prupe.1G122200	MODIFIER	intron_variant	.	protein_coding
9591401	C	G	Prupe.1G122100	MODIFIER	upstream_gene_variant	.	protein_coding
9591401	C	G	Prupe.1G122300	MODIFIER	downstream_gene_variant	.	protein_coding
9591401	C	G	Prupe.1G122200	MODIFIER	intron_variant	.	protein_coding
9591660	T	A	Prupe.1G122100	MODIFIER	upstream_gene_variant	.	protein_coding
9591660	T	A	Prupe.1G122300	MODIFIER	downstream_gene_variant	.	protein_coding
9591660	T	A	Prupe.1G122200	MODIFIER	intron_variant	.	protein_coding
9623801	T	A	Prupe.1G122600	MODIFIER	downstream_gene_variant	.	protein_coding
9623801	T	A	Prupe.1G122700	MODIFIER	downstream_gene_variant	.	protein_coding
9623801	T	A	Prupe.1G122800	MODIFIER	intron_variant	.	protein_coding
9623801	T	A	Prupe.1G122800	MODIFIER	intron_variant	.	protein_coding
9623801	T	A	Prupe.1G122800	MODIFIER	intron_variant	.	protein_coding
9623838	A	T	Prupe.1G122800	MODERATE	missense_variant	p.Ile896Asn	protein_coding
9623838	A	T	Prupe.1G122800	MODERATE	missense_variant	p.Ile852Asn	protein_coding
9623838	A	T	Prupe.1G122800	MODERATE	missense_variant	p.Ile854Asn	protein_coding
9623838	A	T	Prupe.1G122800	MODERATE	missense_variant	p.Ile894Asn	protein_coding
9623838	A	T	Prupe.1G122800	MODIFIER	3_prime_UTR_variant	.	protein_coding
9623838	A	T	Prupe.1G122800	MODIFIER	3_prime_UTR_variant	.	protein_coding
9623838	A	T	Prupe.1G122600	MODIFIER	downstream_gene_variant	.	protein_coding
9623838	A	T	Prupe.1G122700	MODIFIER	downstream_gene_variant	.	protein_coding
9623908	C	T	Prupe.1G122800	MODERATE	missense_variant	p.Val873Ile	protein_coding
9623908	C	T	Prupe.1G122800	MODERATE	missense_variant	p.Val829Ile	protein_coding
9623908	C	T	Prupe.1G122800	MODERATE	missense_variant	p.Val831Ile	protein_coding
9623908	C	T	Prupe.1G122800	MODERATE	missense_variant	p.Val871Ile	protein_coding
9623908	C	T	Prupe.1G122800	MODIFIER	3_prime_UTR_variant	.	protein_coding
9623908	C	T	Prupe.1G122800	MODIFIER	3_prime_UTR_variant	.	protein_coding
9623908	C	T	Prupe.1G122600	MODIFIER	downstream_gene_variant	.	protein_coding
9623908	C	T	Prupe.1G122700	MODIFIER	downstream_gene_variant	.	protein_coding
9623923	T	C	Prupe.1G122800	MODERATE	missense_variant	p.Ile868Val	protein_coding
9623923	T	C	Prupe.1G122800	MODERATE	missense_variant	p.Ile824Val	protein_coding
9623923	T	C	Prupe.1G122800	MODERATE	missense_variant	p.Ile826Val	protein_coding
9623923	T	C	Prupe.1G122800	MODERATE	missense_variant	p.Ile866Val	protein_coding
9623923	T	C	Prupe.1G122800	MODIFIER	3_prime_UTR_variant	.	protein_coding
9623923	T	C	Prupe.1G122800	MODIFIER	3_prime_UTR_variant	.	protein_coding
9623923	T	C	Prupe.1G122600	MODIFIER	downstream_gene_variant	.	protein_coding
9623923	T	C	Prupe.1G122700	MODIFIER	downstream_gene_variant	.	protein_coding
9661159	A	C	Prupe.1G123200	MODIFIER	downstream_gene_variant	.	protein_coding
9661159	A	C	Prupe.1G123300	MODIFIER	intron_variant	.	protein_coding
9661449	A	G	Prupe.1G123300	MODERATE	missense_variant	p.Gln130Arg	protein_coding
9661449	A	G	Prupe.1G123200	MODIFIER	downstream_gene_variant	.	protein_coding
9684118	C	T	Prupe.1G123500	MODIFIER	5_prime_UTR_variant	.	protein_coding
9684118	C	T	Prupe.1G123400	MODIFIER	upstream_gene_variant	.	protein_coding
9684118	C	T	Prupe.1G123600	MODIFIER	upstream_gene_variant	.	protein_coding
9684254	C	G	Prupe.1G123500	MODERATE	missense_variant	p.Ile12Met	protein_coding
9684254	C	G	Prupe.1G123400	MODIFIER	upstream_gene_variant	.	protein_coding
9684254	C	G	Prupe.1G123600	MODIFIER	upstream_gene_variant	.	protein_coding
9741176	C	T	Prupe.1G123700	MODIFIER	5_prime_UTR_variant	.	protein_coding
9741199	A	C	Prupe.1G123700	MODIFIER	5_prime_UTR_variant	.	protein_coding
9768027	G	A	Prupe.1G123900	MODERATE	missense_variant	p.Val639Ile	protein_coding
9768027	G	A	Prupe.1G124000	MODIFIER	downstream_gene_variant	.	protein_coding
9857132	C	T	Prupe.1G124900	MODERATE	missense_variant	p.Met312Ile	protein_coding
9857132	C	T	Prupe.1G125000	MODIFIER	upstream_gene_variant	.	protein_coding
9857132	C	T	Prupe.1G125100	MODIFIER	downstream_gene_variant	.	protein_coding
9857481	A	G	Prupe.1G124900	MODERATE	missense_variant	p.Met196Thr	protein_coding
9857481	A	G	Prupe.1G125000	MODIFIER	upstream_gene_variant	.	protein_coding
9857481	A	G	Prupe.1G125100	MODIFIER	downstream_gene_variant	.	protein_coding
9857504	A	G	Prupe.1G124900	LOW	synonymous_variant	p.Gly188Gly	protein_coding
9857504	A	G	Prupe.1G125000	MODIFIER	upstream_gene_variant	.	protein_coding
9857504	A	G	Prupe.1G125100	MODIFIER	downstream_gene_variant	.	protein_coding
9874165	C	T	Prupe.1G125200	LOW	synonymous_variant	p.Ala20Ala	protein_coding
9874505	G	T	Prupe.1G125200	MODIFIER	intron_variant	.	protein_coding
9874506	T	A	Prupe.1G125200	MODIFIER	intron_variant	.	protein_coding
9912426	A	G	Prupe.1G125900	MODIFIER	upstream_gene_variant	.	protein_coding
9912426	A	G	Prupe.1G125700	MODIFIER	downstream_gene_variant	.	protein_coding
9912426	A	G	Prupe.1G125800	MODIFIER	intron_variant	.	protein_coding
9912434	C	T	Prupe.1G125900	MODIFIER	upstream_gene_variant	.	protein_coding
9912434	C	T	Prupe.1G125700	MODIFIER	downstream_gene_variant	.	protein_coding
9912434	C	T	Prupe.1G125800	MODIFIER	intron_variant	.	protein_coding
9912715	G	A	Prupe.1G125800	LOW	synonymous_variant	p.Gly195Gly	protein_coding
9912715	G	A	Prupe.1G125900	MODIFIER	upstream_gene_variant	.	protein_coding
9912715	G	A	Prupe.1G125700	MODIFIER	downstream_gene_variant	.	protein_coding
9912736	A	G	Prupe.1G125800	LOW	synonymous_variant	p.Arg202Arg	protein_coding
9912736	A	G	Prupe.1G125900	MODIFIER	upstream_gene_variant	.	protein_coding
9912736	A	G	Prupe.1G125700	MODIFIER	downstream_gene_variant	.	protein_coding
9999147	G	C	Prupe.1G127400	MODIFIER	upstream_gene_variant	.	protein_coding
9999147	G	C	Prupe.1G127500	MODIFIER	upstream_gene_variant	.	protein_coding
9999147	G	C	Prupe.1G127600	MODIFIER	upstream_gene_variant	.	protein_coding
9999147	G	C	Prupe.1G127400-Prupe.1G127500	MODIFIER	intergenic_region	.	.
9999155	C	G	Prupe.1G127400	MODIFIER	upstream_gene_variant	.	protein_coding
9999155	C	G	Prupe.1G127500	MODIFIER	upstream_gene_variant	.	protein_coding
9999155	C	G	Prupe.1G127600	MODIFIER	upstream_gene_variant	.	protein_coding
9999155	C	G	Prupe.1G127400-Prupe.1G127500	MODIFIER	intergenic_region	.	.
9999267	A	G	Prupe.1G127400	MODIFIER	upstream_gene_variant	.	protein_coding
9999267	A	G	Prupe.1G127500	MODIFIER	upstream_gene_variant	.	protein_coding
9999267	A	G	Prupe.1G127600	MODIFIER	upstream_gene_variant	.	protein_coding
9999267	A	G	Prupe.1G127400-Prupe.1G127500	MODIFIER	intergenic_region	.	.
9999315	G	C	Prupe.1G127400	MODIFIER	upstream_gene_variant	.	protein_coding
9999315	G	C	Prupe.1G127500	MODIFIER	upstream_gene_variant	.	protein_coding
9999315	G	C	Prupe.1G127600	MODIFIER	upstream_gene_variant	.	protein_coding
9999315	G	C	Prupe.1G127400-Prupe.1G127500	MODIFIER	intergenic_region	.	.
9999330	C	G	Prupe.1G127400	MODIFIER	upstream_gene_variant	.	protein_coding
9999330	C	G	Prupe.1G127500	MODIFIER	upstream_gene_variant	.	protein_coding
9999330	C	G	Prupe.1G127600	MODIFIER	upstream_gene_variant	.	protein_coding
9999330	C	G	Prupe.1G127400-Prupe.1G127500	MODIFIER	intergenic_region	.	.
9999344	A	G	Prupe.1G127400	MODIFIER	upstream_gene_variant	.	protein_coding
9999344	A	G	Prupe.1G127500	MODIFIER	upstream_gene_variant	.	protein_coding
9999344	A	G	Prupe.1G127600	MODIFIER	upstream_gene_variant	.	protein_coding
9999344	A	G	Prupe.1G127400-Prupe.1G127500	MODIFIER	intergenic_region	.	.
10008073	G	A	Prupe.1G127700	LOW	synonymous_variant	p.His120His	protein_coding
10008073	G	A	Prupe.1G127800	MODIFIER	upstream_gene_variant	.	protein_coding
10008073	G	A	Prupe.1G127600	MODIFIER	downstream_gene_variant	.	protein_coding
10008094	G	A	Prupe.1G127700	LOW	synonymous_variant	p.Ser113Ser	protein_coding
10008094	G	A	Prupe.1G127800	MODIFIER	upstream_gene_variant	.	protein_coding
10008094	G	A	Prupe.1G127600	MODIFIER	downstream_gene_variant	.	protein_coding
10008318	C	T	Prupe.1G127800	MODIFIER	upstream_gene_variant	.	protein_coding
10008318	C	T	Prupe.1G127600	MODIFIER	downstream_gene_variant	.	protein_coding
10008318	C	T	Prupe.1G127700	MODIFIER	intron_variant	.	protein_coding
10008324	C	G	Prupe.1G127800	MODIFIER	upstream_gene_variant	.	protein_coding
10008324	C	G	Prupe.1G127600	MODIFIER	downstream_gene_variant	.	protein_coding
10008324	C	G	Prupe.1G127700	MODIFIER	intron_variant	.	protein_coding
10008337	G	A	Prupe.1G127800	MODIFIER	upstream_gene_variant	.	protein_coding
10008337	G	A	Prupe.1G127600	MODIFIER	downstream_gene_variant	.	protein_coding
10008337	G	A	Prupe.1G127700	MODIFIER	intron_variant	.	protein_coding
10008361	C	G	Prupe.1G127700	LOW	synonymous_variant	p.Thr58Thr	protein_coding
10008361	C	G	Prupe.1G127800	MODIFIER	upstream_gene_variant	.	protein_coding
10008361	C	G	Prupe.1G127600	MODIFIER	downstream_gene_variant	.	protein_coding
10008403	A	G	Prupe.1G127700	LOW	synonymous_variant	p.Ile44Ile	protein_coding
10008403	A	G	Prupe.1G127800	MODIFIER	upstream_gene_variant	.	protein_coding
10008403	A	G	Prupe.1G127600	MODIFIER	downstream_gene_variant	.	protein_coding
10024618	T	C	Prupe.1G128100	MODIFIER	upstream_gene_variant	.	protein_coding
10024618	T	C	Prupe.1G128200	MODIFIER	upstream_gene_variant	.	protein_coding
10024618	T	C	Prupe.1G128300	MODIFIER	upstream_gene_variant	.	protein_coding
10024618	T	C	Prupe.1G128200-Prupe.1G128300	MODIFIER	intergenic_region	.	.
10024632	G	C	Prupe.1G128100	MODIFIER	upstream_gene_variant	.	protein_coding
10024632	G	C	Prupe.1G128200	MODIFIER	upstream_gene_variant	.	protein_coding
10024632	G	C	Prupe.1G128300	MODIFIER	upstream_gene_variant	.	protein_coding
10024632	G	C	Prupe.1G128200-Prupe.1G128300	MODIFIER	intergenic_region	.	.
10024647	C	G	Prupe.1G128100	MODIFIER	upstream_gene_variant	.	protein_coding
10024647	C	G	Prupe.1G128200	MODIFIER	upstream_gene_variant	.	protein_coding
10024647	C	G	Prupe.1G128300	MODIFIER	upstream_gene_variant	.	protein_coding
10024647	C	G	Prupe.1G128200-Prupe.1G128300	MODIFIER	intergenic_region	.	.
10024695	T	C	Prupe.1G128100	MODIFIER	upstream_gene_variant	.	protein_coding
10024695	T	C	Prupe.1G128200	MODIFIER	upstream_gene_variant	.	protein_coding
10024695	T	C	Prupe.1G128300	MODIFIER	upstream_gene_variant	.	protein_coding
10024695	T	C	Prupe.1G128200-Prupe.1G128300	MODIFIER	intergenic_region	.	.
10024807	G	C	Prupe.1G128100	MODIFIER	upstream_gene_variant	.	protein_coding
10024807	G	C	Prupe.1G128200	MODIFIER	upstream_gene_variant	.	protein_coding
10024807	G	C	Prupe.1G128300	MODIFIER	upstream_gene_variant	.	protein_coding
10024807	G	C	Prupe.1G128200-Prupe.1G128300	MODIFIER	intergenic_region	.	.
10024815	C	G	Prupe.1G128100	MODIFIER	upstream_gene_variant	.	protein_coding
10024815	C	G	Prupe.1G128200	MODIFIER	upstream_gene_variant	.	protein_coding
10024815	C	G	Prupe.1G128300	MODIFIER	upstream_gene_variant	.	protein_coding
10024815	C	G	Prupe.1G128200-Prupe.1G128300	MODIFIER	intergenic_region	.	.
10036798	T	C	Prupe.1G128500	MODERATE	missense_variant	p.Ile117Thr	protein_coding
10036798	T	C	Prupe.1G128400	MODIFIER	upstream_gene_variant	.	protein_coding
10036798	T	C	Prupe.1G128600	MODIFIER	upstream_gene_variant	.	protein_coding
10037052	A	T	Prupe.1G128400	MODIFIER	upstream_gene_variant	.	protein_coding
10037052	A	T	Prupe.1G128600	MODIFIER	upstream_gene_variant	.	protein_coding
10037052	A	T	Prupe.1G128500	MODIFIER	downstream_gene_variant	.	protein_coding
10037052	A	T	Prupe.1G128500-Prupe.1G128600	MODIFIER	intergenic_region	.	.
10037057	T	C	Prupe.1G128400	MODIFIER	upstream_gene_variant	.	protein_coding
10037057	T	C	Prupe.1G128600	MODIFIER	upstream_gene_variant	.	protein_coding
10037057	T	C	Prupe.1G128500	MODIFIER	downstream_gene_variant	.	protein_coding
10037057	T	C	Prupe.1G128500-Prupe.1G128600	MODIFIER	intergenic_region	.	.
10037141	G	A	Prupe.1G128400	MODIFIER	upstream_gene_variant	.	protein_coding
10037141	G	A	Prupe.1G128600	MODIFIER	upstream_gene_variant	.	protein_coding
10037141	G	A	Prupe.1G128500	MODIFIER	downstream_gene_variant	.	protein_coding
10037141	G	A	Prupe.1G128500-Prupe.1G128600	MODIFIER	intergenic_region	.	.
10057763	A	G	Prupe.1G129100	MODIFIER	upstream_gene_variant	.	protein_coding
10057763	A	G	Prupe.1G128800	MODIFIER	downstream_gene_variant	.	protein_coding
10057763	A	G	Prupe.1G128900	MODIFIER	downstream_gene_variant	.	protein_coding
10057763	A	G	Prupe.1G129200	MODIFIER	downstream_gene_variant	.	protein_coding
10057763	A	G	Prupe.1G129000	MODIFIER	intron_variant	.	protein_coding
10057826	C	A	Prupe.1G129100	MODIFIER	upstream_gene_variant	.	protein_coding
10057826	C	A	Prupe.1G128800	MODIFIER	downstream_gene_variant	.	protein_coding
10057826	C	A	Prupe.1G128900	MODIFIER	downstream_gene_variant	.	protein_coding
10057826	C	A	Prupe.1G129200	MODIFIER	downstream_gene_variant	.	protein_coding
10057826	C	A	Prupe.1G129000	MODIFIER	intron_variant	.	protein_coding
10070088	T	G	Prupe.1G129300	MODIFIER	3_prime_UTR_variant	.	protein_coding
10070088	T	G	Prupe.1G129200	MODIFIER	upstream_gene_variant	.	protein_coding
10078329	T	G	Prupe.1G129400	MODIFIER	intron_variant	.	protein_coding
10078414	T	A	Prupe.1G129400	LOW	synonymous_variant	p.Leu990Leu	protein_coding
10106211	T	C	Prupe.1G129700	LOW	synonymous_variant	p.Asp469Asp	protein_coding
10106211	T	C	Prupe.1G129800	MODIFIER	upstream_gene_variant	.	protein_coding
10106211	T	C	Prupe.1G129900	MODIFIER	upstream_gene_variant	.	protein_coding
10106255	T	C	Prupe.1G129700	MODERATE	missense_variant	p.Ile484Thr	protein_coding
10106255	T	C	Prupe.1G129800	MODIFIER	upstream_gene_variant	.	protein_coding
10106255	T	C	Prupe.1G129900	MODIFIER	upstream_gene_variant	.	protein_coding
10106277	T	C	Prupe.1G129700	LOW	synonymous_variant	p.Asp491Asp	protein_coding
10106277	T	C	Prupe.1G129800	MODIFIER	upstream_gene_variant	.	protein_coding
10106277	T	C	Prupe.1G129900	MODIFIER	upstream_gene_variant	.	protein_coding
10106309	A	C	Prupe.1G129700	MODERATE	missense_variant	p.Glu502Ala	protein_coding
10106309	A	C	Prupe.1G129800	MODIFIER	upstream_gene_variant	.	protein_coding
10106309	A	C	Prupe.1G129900	MODIFIER	upstream_gene_variant	.	protein_coding
10106338	G	T	Prupe.1G129700	MODERATE	missense_variant	p.Val512Phe	protein_coding
10106338	G	T	Prupe.1G129800	MODIFIER	upstream_gene_variant	.	protein_coding
10106338	G	T	Prupe.1G129900	MODIFIER	upstream_gene_variant	.	protein_coding
10115902	C	T	Prupe.1G129900	MODIFIER	downstream_gene_variant	.	protein_coding
10115902	C	T	Prupe.1G130000	MODIFIER	intron_variant	.	protein_coding
10115902	C	T	Prupe.1G130000	MODIFIER	intron_variant	.	protein_coding
10115902	C	T	Prupe.1G130000	MODIFIER	intron_variant	.	protein_coding
10116086	A	G	Prupe.1G130000	LOW	synonymous_variant	p.Ile915Ile	protein_coding
10116086	A	G	Prupe.1G130000	LOW	synonymous_variant	p.Ile915Ile	protein_coding
10116086	A	G	Prupe.1G130000	LOW	synonymous_variant	p.Ile878Ile	protein_coding
10116086	A	G	Prupe.1G130000	LOW	synonymous_variant	p.Ile820Ile	protein_coding
10116086	A	G	Prupe.1G130000	LOW	synonymous_variant	p.Ile857Ile	protein_coding
10116086	A	G	Prupe.1G130000	LOW	synonymous_variant	p.Ile878Ile	protein_coding
10116086	A	G	Prupe.1G129900	MODIFIER	downstream_gene_variant	.	protein_coding
10116088	T	C	Prupe.1G130000	MODERATE	missense_variant	p.Ile915Val	protein_coding
10116088	T	C	Prupe.1G130000	MODERATE	missense_variant	p.Ile915Val	protein_coding
10116088	T	C	Prupe.1G130000	MODERATE	missense_variant	p.Ile878Val	protein_coding
10116088	T	C	Prupe.1G130000	MODERATE	missense_variant	p.Ile820Val	protein_coding
10116088	T	C	Prupe.1G130000	MODERATE	missense_variant	p.Ile857Val	protein_coding
10116088	T	C	Prupe.1G130000	MODERATE	missense_variant	p.Ile878Val	protein_coding
10116088	T	C	Prupe.1G129900	MODIFIER	downstream_gene_variant	.	protein_coding
10119205	G	A	Prupe.1G130100	MODIFIER	downstream_gene_variant	.	protein_coding
10119205	G	A	Prupe.1G130000	MODIFIER	intron_variant	.	protein_coding
[truncated: 9,164 more rows]

## Sheet: Pp02
POS	REF	ALT	EFF[*].GENE	EFF[*].IMPACT	EFF[*].EFFECT	EFF[*].AA	EFF[*].BIOTYPE	a
8002697	A	G	Prupe.2G062100	MODIFIER	5_prime_UTR_variant	.	protein_coding	1
8002700	G	A	Prupe.2G062100	MODIFIER	5_prime_UTR_variant	.	protein_coding	1
8002701	T	C	Prupe.2G062100	MODIFIER	5_prime_UTR_variant	.	protein_coding	1
8002734	A	C	Prupe.2G062100	MODIFIER	5_prime_UTR_variant	.	protein_coding	1
8002738	G	C	Prupe.2G062100	MODIFIER	5_prime_UTR_variant	.	protein_coding	1
8002740	T	C	Prupe.2G062100	MODIFIER	5_prime_UTR_variant	.	protein_coding	1
8002741	C	T	Prupe.2G062100	MODIFIER	5_prime_UTR_variant	.	protein_coding	1
8002742	T	C	Prupe.2G062100	MODIFIER	5_prime_UTR_variant	.	protein_coding	1
8002743	C	T	Prupe.2G062100	MODIFIER	5_prime_UTR_variant	.	protein_coding	1
8002745	C	T	Prupe.2G062100	LOW	5_prime_UTR_premature_start_codon_gain_variant	.	protein_coding	1
8002745	C	T	Prupe.2G062100	MODIFIER	5_prime_UTR_variant	.	protein_coding	1
8002746	G	C	Prupe.2G062100	MODIFIER	5_prime_UTR_variant	.	protein_coding	1
17656249	G	C	Prupe.2G118500	MODIFIER	intron_variant	.	protein_coding	4
17656249	G	C	Prupe.2G118500	MODIFIER	intron_variant	.	protein_coding	3
17656252	T	C	Prupe.2G118500	MODIFIER	intron_variant	.	protein_coding	4
17656252	T	C	Prupe.2G118500	MODIFIER	intron_variant	.	protein_coding	3
17656265	A	G	Prupe.2G118500	MODIFIER	intron_variant	.	protein_coding	4
17656265	A	G	Prupe.2G118500	MODIFIER	intron_variant	.	protein_coding	3
17656277	G	A	Prupe.2G118500	MODIFIER	intron_variant	.	protein_coding	4
17656277	G	A	Prupe.2G118500	MODIFIER	intron_variant	.	protein_coding	3
20624545	T	C	Prupe.2G151300	MODIFIER	upstream_gene_variant	.	protein_coding	-1
20624545	T	C	Prupe.2G151400	MODIFIER	intron_variant	.	protein_coding	4
20624545	T	C	Prupe.2G151400	MODIFIER	intron_variant	.	protein_coding	3
20624545	T	C	Prupe.2G151400	MODIFIER	intron_variant	.	protein_coding	2
20626757	T	G	Prupe.2G151400	MODIFIER	5_prime_UTR_variant	.	protein_coding	1
20626778	C	A	Prupe.2G151400	MODIFIER	5_prime_UTR_variant	.	protein_coding	1
20682308	A	G	Prupe.2G152000	LOW	synonymous_variant	p.Leu281Leu	protein_coding	2
20682308	A	G	Prupe.2G152100	MODIFIER	upstream_gene_variant	.	protein_coding	-1
20682308	A	G	Prupe.2G151900	MODIFIER	downstream_gene_variant	.	protein_coding	-1
20682383	G	A	Prupe.2G152000	LOW	synonymous_variant	p.Ser306Ser	protein_coding	2
20682383	G	A	Prupe.2G152100	MODIFIER	upstream_gene_variant	.	protein_coding	-1
20682383	G	A	Prupe.2G151900	MODIFIER	downstream_gene_variant	.	protein_coding	-1
20682512	C	T	Prupe.2G152000	LOW	synonymous_variant	p.Asn349Asn	protein_coding	2
20682512	C	T	Prupe.2G152100	MODIFIER	upstream_gene_variant	.	protein_coding	-1
20682512	C	T	Prupe.2G151900	MODIFIER	downstream_gene_variant	.	protein_coding	-1
20682758	A	G	Prupe.2G152000	LOW	synonymous_variant	p.Ser431Ser	protein_coding	2
20682758	A	G	Prupe.2G152100	MODIFIER	upstream_gene_variant	.	protein_coding	-1
20682758	A	G	Prupe.2G151900	MODIFIER	downstream_gene_variant	.	protein_coding	-1
20682760	A	G	Prupe.2G152000	MODERATE	missense_variant	p.Gln432Arg	protein_coding	2
20682760	A	G	Prupe.2G152100	MODIFIER	upstream_gene_variant	.	protein_coding	-1
20682760	A	G	Prupe.2G151900	MODIFIER	downstream_gene_variant	.	protein_coding	-1
20682834	G	T	Prupe.2G152000	HIGH	stop_gained	p.Glu457*	protein_coding	2
20682834	G	T	Prupe.2G152100	MODIFIER	upstream_gene_variant	.	protein_coding	-1
20682834	G	T	Prupe.2G151900	MODIFIER	downstream_gene_variant	.	protein_coding	-1
20684475	A	G	Prupe.2G152000	MODIFIER	3_prime_UTR_variant	.	protein_coding	2
20684475	A	G	Prupe.2G152100	MODIFIER	upstream_gene_variant	.	protein_coding	-1
20684475	A	G	Prupe.2G151900	MODIFIER	downstream_gene_variant	.	protein_coding	-1
20684491	G	T	Prupe.2G152000	MODIFIER	3_prime_UTR_variant	.	protein_coding	2
20684491	G	T	Prupe.2G152100	MODIFIER	upstream_gene_variant	.	protein_coding	-1
20684491	G	T	Prupe.2G151900	MODIFIER	downstream_gene_variant	.	protein_coding	-1
20684510	G	A	Prupe.2G152000	MODIFIER	3_prime_UTR_variant	.	protein_coding	2
20684510	G	A	Prupe.2G152100	MODIFIER	upstream_gene_variant	.	protein_coding	-1
20684510	G	A	Prupe.2G151900	MODIFIER	downstream_gene_variant	.	protein_coding	-1
20684525	C	A	Prupe.2G152000	MODIFIER	3_prime_UTR_variant	.	protein_coding	2
20684525	C	A	Prupe.2G152100	MODIFIER	upstream_gene_variant	.	protein_coding	-1
20684525	C	A	Prupe.2G151900	MODIFIER	downstream_gene_variant	.	protein_coding	-1
20684724	A	G	Prupe.2G152100	MODIFIER	upstream_gene_variant	.	protein_coding	-1
20684724	A	G	Prupe.2G151900	MODIFIER	downstream_gene_variant	.	protein_coding	-1
20684724	A	G	Prupe.2G152000	MODIFIER	downstream_gene_variant	.	protein_coding	-1
20684724	A	G	Prupe.2G152000-Prupe.2G152100	MODIFIER	intergenic_region	.	.	-1
20684816	A	G	Prupe.2G152100	MODIFIER	upstream_gene_variant	.	protein_coding	-1
20684816	A	G	Prupe.2G151900	MODIFIER	downstream_gene_variant	.	protein_coding	-1
20684816	A	G	Prupe.2G152000	MODIFIER	downstream_gene_variant	.	protein_coding	-1
20684816	A	G	Prupe.2G152000-Prupe.2G152100	MODIFIER	intergenic_region	.	.	-1
20732378	G	T	Prupe.2G152800	MODERATE	missense_variant	p.Phe120Leu	protein_coding	4
20732378	G	T	Prupe.2G152800	MODERATE	missense_variant	p.Phe82Leu	protein_coding	2
20732378	G	T	Prupe.2G152800	MODERATE	missense_variant	p.Phe56Leu	protein_coding	4
20732378	G	T	Prupe.2G152900	MODIFIER	upstream_gene_variant	.	protein_coding	-1
20732396	A	G	Prupe.2G152800	LOW	splice_region_variant&intron_variant	.	protein_coding	3
20732396	A	G	Prupe.2G152800	LOW	splice_region_variant&intron_variant	.	protein_coding	1
20732396	A	G	Prupe.2G152900	MODIFIER	upstream_gene_variant	.	protein_coding	-1
20732464	G	T	Prupe.2G152900	MODIFIER	upstream_gene_variant	.	protein_coding	-1
20732464	G	T	Prupe.2G152800	MODIFIER	intron_variant	.	protein_coding	3
20732464	G	T	Prupe.2G152800	MODIFIER	intron_variant	.	protein_coding	1
20732473	T	C	Prupe.2G152900	MODIFIER	upstream_gene_variant	.	protein_coding	-1
20732473	T	C	Prupe.2G152800	MODIFIER	intron_variant	.	protein_coding	3
20732473	T	C	Prupe.2G152800	MODIFIER	intron_variant	.	protein_coding	1
20732645	T	G	Prupe.2G152800	MODERATE	missense_variant	p.Asn66His	protein_coding	3
20732645	T	G	Prupe.2G152800	MODERATE	missense_variant	p.Asn28His	protein_coding	1
20732645	T	G	Prupe.2G152800	MODERATE	missense_variant	p.Asn2His	protein_coding	3
20732645	T	G	Prupe.2G152900	MODIFIER	upstream_gene_variant	.	protein_coding	-1
20763860	T	A	Prupe.2G153400	LOW	synonymous_variant	p.Ser444Ser	protein_coding	5
20763860	T	A	Prupe.2G153400	LOW	synonymous_variant	p.Ser444Ser	protein_coding	6
20763860	T	A	Prupe.2G153300	MODIFIER	upstream_gene_variant	.	protein_coding	-1
20763860	T	A	Prupe.2G153200	MODIFIER	downstream_gene_variant	.	protein_coding	-1
20763860	T	A	Prupe.2G153500	MODIFIER	downstream_gene_variant	.	protein_coding	-1
20763937	A	T	Prupe.2G153400	MODERATE	missense_variant	p.Phe419Ile	protein_coding	5
20763937	A	T	Prupe.2G153400	MODERATE	missense_variant	p.Phe419Ile	protein_coding	6
20763937	A	T	Prupe.2G153300	MODIFIER	upstream_gene_variant	.	protein_coding	-1
20763937	A	T	Prupe.2G153200	MODIFIER	downstream_gene_variant	.	protein_coding	-1
20763937	A	T	Prupe.2G153500	MODIFIER	downstream_gene_variant	.	protein_coding	-1
20764007	G	A	Prupe.2G153400	LOW	synonymous_variant	p.Phe395Phe	protein_coding	5
20764007	G	A	Prupe.2G153400	LOW	synonymous_variant	p.Phe395Phe	protein_coding	6
20764007	G	A	Prupe.2G153300	MODIFIER	upstream_gene_variant	.	protein_coding	-1
20764007	G	A	Prupe.2G153200	MODIFIER	downstream_gene_variant	.	protein_coding	-1
20764007	G	A	Prupe.2G153500	MODIFIER	downstream_gene_variant	.	protein_coding	-1
20764010	A	T	Prupe.2G153400	LOW	synonymous_variant	p.Ser394Ser	protein_coding	5
20764010	A	T	Prupe.2G153400	LOW	synonymous_variant	p.Ser394Ser	protein_coding	6
20764010	A	T	Prupe.2G153300	MODIFIER	upstream_gene_variant	.	protein_coding	-1
20764010	A	T	Prupe.2G153200	MODIFIER	downstream_gene_variant	.	protein_coding	-1
20764010	A	T	Prupe.2G153500	MODIFIER	downstream_gene_variant	.	protein_coding	-1
20764052	T	G	Prupe.2G153400	LOW	synonymous_variant	p.Ser380Ser	protein_coding	5
20764052	T	G	Prupe.2G153400	LOW	synonymous_variant	p.Ser380Ser	protein_coding	6
20764052	T	G	Prupe.2G153300	MODIFIER	upstream_gene_variant	.	protein_coding	-1
20764052	T	G	Prupe.2G153200	MODIFIER	downstream_gene_variant	.	protein_coding	-1
20764052	T	G	Prupe.2G153500	MODIFIER	downstream_gene_variant	.	protein_coding	-1
20855464	A	C	Prupe.2G155100	MODIFIER	upstream_gene_variant	.	protein_coding	-1
20855464	A	C	Prupe.2G155000	MODIFIER	downstream_gene_variant	.	protein_coding	-1
20855464	A	C	Prupe.2G155000-Prupe.2G155100	MODIFIER	intergenic_region	.	.	-1
20855939	G	A	Prupe.2G155100	MODIFIER	upstream_gene_variant	.	protein_coding	-1
20855939	G	A	Prupe.2G155000	MODIFIER	downstream_gene_variant	.	protein_coding	-1
20855939	G	A	Prupe.2G155000-Prupe.2G155100	MODIFIER	intergenic_region	.	.	-1
20855945	G	T	Prupe.2G155100	MODIFIER	upstream_gene_variant	.	protein_coding	-1
20855945	G	T	Prupe.2G155000	MODIFIER	downstream_gene_variant	.	protein_coding	-1
20855945	G	T	Prupe.2G155000-Prupe.2G155100	MODIFIER	intergenic_region	.	.	-1
20855978	A	C	Prupe.2G155100	MODIFIER	upstream_gene_variant	.	protein_coding	-1
20855978	A	C	Prupe.2G155000	MODIFIER	downstream_gene_variant	.	protein_coding	-1
20855978	A	C	Prupe.2G155000-Prupe.2G155100	MODIFIER	intergenic_region	.	.	-1
20856006	A	G	Prupe.2G155100	MODIFIER	upstream_gene_variant	.	protein_coding	-1
20856006	A	G	Prupe.2G155000	MODIFIER	downstream_gene_variant	.	protein_coding	-1
20856006	A	G	Prupe.2G155000-Prupe.2G155100	MODIFIER	intergenic_region	.	.	-1
20856469	C	A	Prupe.2G155100	MODIFIER	upstream_gene_variant	.	protein_coding	-1
20856469	C	A	Prupe.2G155000	MODIFIER	downstream_gene_variant	.	protein_coding	-1
20856469	C	A	Prupe.2G155200	MODIFIER	downstream_gene_variant	.	protein_coding	-1
20856469	C	A	Prupe.2G155000-Prupe.2G155100	MODIFIER	intergenic_region	.	.	-1
20856473	A	G	Prupe.2G155100	MODIFIER	upstream_gene_variant	.	protein_coding	-1
20856473	A	G	Prupe.2G155000	MODIFIER	downstream_gene_variant	.	protein_coding	-1
20856473	A	G	Prupe.2G155200	MODIFIER	downstream_gene_variant	.	protein_coding	-1
20856473	A	G	Prupe.2G155000-Prupe.2G155100	MODIFIER	intergenic_region	.	.	-1
20859081	T	G	Prupe.2G155100	MODIFIER	upstream_gene_variant	.	protein_coding	-1
20859081	T	G	Prupe.2G155000	MODIFIER	downstream_gene_variant	.	protein_coding	-1
20859081	T	G	Prupe.2G155200	MODIFIER	downstream_gene_variant	.	protein_coding	-1
20859081	T	G	Prupe.2G155000-Prupe.2G155100	MODIFIER	intergenic_region	.	.	-1
20859102	C	T	Prupe.2G155100	MODIFIER	upstream_gene_variant	.	protein_coding	-1
20859102	C	T	Prupe.2G155000	MODIFIER	downstream_gene_variant	.	protein_coding	-1
20859102	C	T	Prupe.2G155200	MODIFIER	downstream_gene_variant	.	protein_coding	-1
20859102	C	T	Prupe.2G155000-Prupe.2G155100	MODIFIER	intergenic_region	.	.	-1
20859109	T	G	Prupe.2G155100	MODIFIER	upstream_gene_variant	.	protein_coding	-1
20859109	T	G	Prupe.2G155000	MODIFIER	downstream_gene_variant	.	protein_coding	-1
20859109	T	G	Prupe.2G155200	MODIFIER	downstream_gene_variant	.	protein_coding	-1
20859109	T	G	Prupe.2G155000-Prupe.2G155100	MODIFIER	intergenic_region	.	.	-1
20859114	G	T	Prupe.2G155100	MODIFIER	upstream_gene_variant	.	protein_coding	-1
20859114	G	T	Prupe.2G155000	MODIFIER	downstream_gene_variant	.	protein_coding	-1
20859114	G	T	Prupe.2G155200	MODIFIER	downstream_gene_variant	.	protein_coding	-1
20859114	G	T	Prupe.2G155000-Prupe.2G155100	MODIFIER	intergenic_region	.	.	-1
20859182	G	A	Prupe.2G155100	MODIFIER	upstream_gene_variant	.	protein_coding	-1
20859182	G	A	Prupe.2G155000	MODIFIER	downstream_gene_variant	.	protein_coding	-1
20859182	G	A	Prupe.2G155200	MODIFIER	downstream_gene_variant	.	protein_coding	-1
20859182	G	A	Prupe.2G155000-Prupe.2G155100	MODIFIER	intergenic_region	.	.	-1
20859425	T	A	Prupe.2G155100	MODERATE	missense_variant	p.Leu16Gln	protein_coding	1
20859425	T	A	Prupe.2G155200	MODIFIER	downstream_gene_variant	.	protein_coding	-1
20975721	C	T	Prupe.2G156300	MODIFIER	downstream_gene_variant	.	protein_coding	-1
20975721	C	T	Prupe.2G156200	MODIFIER	intron_variant	.	protein_coding	7
20975721	C	T	Prupe.2G156200	MODIFIER	intron_variant	.	protein_coding	2
20975721	C	T	Prupe.2G156200	MODIFIER	intron_variant	.	protein_coding	6
20975757	A	G	Prupe.2G156300	MODIFIER	downstream_gene_variant	.	protein_coding	-1
20975757	A	G	Prupe.2G156200	MODIFIER	intron_variant	.	protein_coding	7
20975757	A	G	Prupe.2G156200	MODIFIER	intron_variant	.	protein_coding	2
20975757	A	G	Prupe.2G156200	MODIFIER	intron_variant	.	protein_coding	6
20975774	T	G	Prupe.2G156300	MODIFIER	downstream_gene_variant	.	protein_coding	-1
20975774	T	G	Prupe.2G156200	MODIFIER	intron_variant	.	protein_coding	7
20975774	T	G	Prupe.2G156200	MODIFIER	intron_variant	.	protein_coding	2
20975774	T	G	Prupe.2G156200	MODIFIER	intron_variant	.	protein_coding	6
20975798	C	T	Prupe.2G156300	MODIFIER	downstream_gene_variant	.	protein_coding	-1
20975798	C	T	Prupe.2G156200	MODIFIER	intron_variant	.	protein_coding	7
20975798	C	T	Prupe.2G156200	MODIFIER	intron_variant	.	protein_coding	2
20975798	C	T	Prupe.2G156200	MODIFIER	intron_variant	.	protein_coding	6
21045485	A	G	Prupe.2G157100	MODERATE	missense_variant	p.Leu757Pro	protein_coding	1
21045485	A	G	Prupe.2G157200	MODIFIER	upstream_gene_variant	.	protein_coding	-1
21045485	A	G	Prupe.2G157000	MODIFIER	downstream_gene_variant	.	protein_coding	-1
21045863	G	A	Prupe.2G157100	MODERATE	missense_variant	p.Thr631Ile	protein_coding	1
21045863	G	A	Prupe.2G157200	MODIFIER	upstream_gene_variant	.	protein_coding	-1
21045863	G	A	Prupe.2G157000	MODIFIER	downstream_gene_variant	.	protein_coding	-1
21091238	A	G	Prupe.2G157600	MODIFIER	downstream_gene_variant	.	protein_coding	-1
21091238	A	G	Prupe.2G157500-Prupe.2G157600	MODIFIER	intergenic_region	.	.	-1
21091460	C	G	Prupe.2G157600	MODIFIER	downstream_gene_variant	.	protein_coding	-1
21091460	C	G	Prupe.2G157500-Prupe.2G157600	MODIFIER	intergenic_region	.	.	-1
21091463	T	G	Prupe.2G157600	MODIFIER	downstream_gene_variant	.	protein_coding	-1
21091463	T	G	Prupe.2G157500-Prupe.2G157600	MODIFIER	intergenic_region	.	.	-1
21093910	A	G	Prupe.2G157600	MODIFIER	downstream_gene_variant	.	protein_coding	-1
21093910	A	G	Prupe.2G157500-Prupe.2G157600	MODIFIER	intergenic_region	.	.	-1
21094046	G	A	Prupe.2G157600	MODIFIER	downstream_gene_variant	.	protein_coding	-1
21094046	G	A	Prupe.2G157500-Prupe.2G157600	MODIFIER	intergenic_region	.	.	-1
21096687	G	C	Prupe.2G157600	MODIFIER	5_prime_UTR_variant	.	protein_coding	3
21096687	G	C	Prupe.2G157600	MODIFIER	intron_variant	.	protein_coding	2
21096687	G	C	Prupe.2G157600	MODIFIER	intron_variant	.	protein_coding	3
21096699	C	T	Prupe.2G157600	MODIFIER	5_prime_UTR_variant	.	protein_coding	3
21096699	C	T	Prupe.2G157600	MODIFIER	intron_variant	.	protein_coding	2
21096699	C	T	Prupe.2G157600	MODIFIER	intron_variant	.	protein_coding	3
21096704	C	A	Prupe.2G157600	MODIFIER	5_prime_UTR_variant	.	protein_coding	3
21096704	C	A	Prupe.2G157600	MODIFIER	intron_variant	.	protein_coding	2
21096704	C	A	Prupe.2G157600	MODIFIER	intron_variant	.	protein_coding	3
21096718	C	T	Prupe.2G157600	MODIFIER	5_prime_UTR_variant	.	protein_coding	3
21096718	C	T	Prupe.2G157600	MODIFIER	intron_variant	.	protein_coding	2
21096718	C	T	Prupe.2G157600	MODIFIER	intron_variant	.	protein_coding	3
21209551	G	A	Prupe.2G159800	MODERATE	missense_variant	p.Arg240Lys	protein_coding	5
21209551	G	A	Prupe.2G159800	MODERATE	missense_variant	p.Arg179Lys	protein_coding	5
21209551	G	A	Prupe.2G159900	MODIFIER	upstream_gene_variant	.	protein_coding	-1
21209597	T	A	Prupe.2G159800	MODERATE	missense_variant	p.His255Gln	protein_coding	5
21209597	T	A	Prupe.2G159800	MODERATE	missense_variant	p.His194Gln	protein_coding	5
21209597	T	A	Prupe.2G159900	MODIFIER	upstream_gene_variant	.	protein_coding	-1
21209853	C	T	Prupe.2G159900	MODIFIER	upstream_gene_variant	.	protein_coding	-1
21209853	C	T	Prupe.2G159800	MODIFIER	intron_variant	.	protein_coding	5
21209873	T	C	Prupe.2G159900	MODIFIER	upstream_gene_variant	.	protein_coding	-1
21209873	T	C	Prupe.2G159800	MODIFIER	intron_variant	.	protein_coding	5
21209886	A	C	Prupe.2G159900	MODIFIER	upstream_gene_variant	.	protein_coding	-1
21209886	A	C	Prupe.2G159800	MODIFIER	intron_variant	.	protein_coding	5
21220205	T	C	Prupe.2G160000	LOW	synonymous_variant	p.Asp393Asp	protein_coding	12
21220205	T	C	Prupe.2G160000	LOW	synonymous_variant	p.Asp393Asp	protein_coding	11
21220268	C	A	Prupe.2G160000	MODIFIER	intron_variant	.	protein_coding	12
21220268	C	A	Prupe.2G160000	MODIFIER	intron_variant	.	protein_coding	11
21220273	A	G	Prupe.2G160000	MODIFIER	intron_variant	.	protein_coding	12
21220273	A	G	Prupe.2G160000	MODIFIER	intron_variant	.	protein_coding	11
21250510	G	C	Prupe.2G160700	MODIFIER	upstream_gene_variant	.	protein_coding	-1
21250510	G	C	Prupe.2G160800	MODIFIER	upstream_gene_variant	.	protein_coding	-1
21250510	G	C	Prupe.2G160600	MODIFIER	downstream_gene_variant	.	protein_coding	-1
21250510	G	C	Prupe.2G160600-Prupe.2G160700	MODIFIER	intergenic_region	.	.	-1
21262977	G	C	Prupe.2G161100	MODIFIER	upstream_gene_variant	.	protein_coding	-1
21262977	G	C	Prupe.2G161200	MODIFIER	upstream_gene_variant	.	protein_coding	-1
21262977	G	C	Prupe.2G160900	MODIFIER	downstream_gene_variant	.	protein_coding	-1
21262977	G	C	Prupe.2G161000	MODIFIER	downstream_gene_variant	.	protein_coding	-1
21262977	G	C	Prupe.2G161000-Prupe.2G161100	MODIFIER	intergenic_region	.	.	-1
21328101	C	T	Prupe.2G162700	MODERATE	missense_variant	p.Asp266Asn	protein_coding	2
21328240	G	C	Prupe.2G162700	LOW	synonymous_variant	p.Thr219Thr	protein_coding	2
21328268	T	G	Prupe.2G162700	MODERATE	missense_variant	p.Glu210Ala	protein_coding	2
21328291	T	C	Prupe.2G162700	LOW	synonymous_variant	p.Ala202Ala	protein_coding	2
21328327	C	A	Prupe.2G162700	MODERATE	missense_variant	p.Met190Ile	protein_coding	2
21328340	C	A	Prupe.2G162700	MODERATE	missense_variant	p.Arg186Leu	protein_coding	2
21328361	C	T	Prupe.2G162700	MODERATE	missense_variant	p.Arg179Lys	protein_coding	2
21328366	G	A	Prupe.2G162700	LOW	synonymous_variant	p.Ala177Ala	protein_coding	2
21328678	G	A	Prupe.2G162700	LOW	synonymous_variant	p.Ala73Ala	protein_coding	2
21328732	A	C	Prupe.2G162700	LOW	synonymous_variant	p.Gly55Gly	protein_coding	2
21362699	C	G	Prupe.2G163400	MODERATE	missense_variant	p.Gly247Arg	protein_coding	4
21362699	C	G	Prupe.2G163200	MODIFIER	upstream_gene_variant	.	protein_coding	-1
21362699	C	G	Prupe.2G163300	MODIFIER	upstream_gene_variant	.	protein_coding	-1
21362928	A	C	Prupe.2G163200	MODIFIER	upstream_gene_variant	.	protein_coding	-1
21362928	A	C	Prupe.2G163300	MODIFIER	upstream_gene_variant	.	protein_coding	-1
21362928	A	C	Prupe.2G163500	MODIFIER	upstream_gene_variant	.	protein_coding	-1
21362928	A	C	Prupe.2G163400	MODIFIER	intron_variant	.	protein_coding	3
21384677	G	A	Prupe.2G163700	MODIFIER	upstream_gene_variant	.	protein_coding	-1
21384677	G	A	Prupe.2G163800	MODIFIER	intron_variant	.	protein_coding	3
21384697	G	A	Prupe.2G163700	MODIFIER	upstream_gene_variant	.	protein_coding	-1
21384697	G	A	Prupe.2G163800	MODIFIER	intron_variant	.	protein_coding	3
21384771	A	G	Prupe.2G163700	MODIFIER	upstream_gene_variant	.	protein_coding	-1
21384771	A	G	Prupe.2G163800	MODIFIER	intron_variant	.	protein_coding	3
21384873	G	T	Prupe.2G163700	MODIFIER	upstream_gene_variant	.	protein_coding	-1
21384873	G	T	Prupe.2G163800	MODIFIER	intron_variant	.	protein_coding	3
21456857	C	T	Prupe.2G164900	MODERATE	missense_variant	p.Leu151Phe	protein_coding	2
21456857	C	T	Prupe.2G165000	MODIFIER	upstream_gene_variant	.	protein_coding	-1
21456857	C	T	Prupe.2G164800	MODIFIER	downstream_gene_variant	.	protein_coding	-1
21456868	G	C	Prupe.2G164900	LOW	synonymous_variant	p.Val154Val	protein_coding	2
21456868	G	C	Prupe.2G165000	MODIFIER	upstream_gene_variant	.	protein_coding	-1
21456868	G	C	Prupe.2G164800	MODIFIER	downstream_gene_variant	.	protein_coding	-1
21463861	T	A	Prupe.2G165100	LOW	synonymous_variant	p.Ile69Ile	protein_coding	2
21463861	T	A	Prupe.2G165200	MODIFIER	upstream_gene_variant	.	protein_coding	-1
21463861	T	A	Prupe.2G164900	MODIFIER	downstream_gene_variant	.	protein_coding	-1
21463861	T	A	Prupe.2G165000	MODIFIER	downstream_gene_variant	.	protein_coding	-1
21463884	G	T	Prupe.2G165100	MODERATE	missense_variant	p.Arg77Ile	protein_coding	2
21463884	G	T	Prupe.2G165200	MODIFIER	upstream_gene_variant	.	protein_coding	-1
21463884	G	T	Prupe.2G164900	MODIFIER	downstream_gene_variant	.	protein_coding	-1
21463884	G	T	Prupe.2G165000	MODIFIER	downstream_gene_variant	.	protein_coding	-1
21464033	G	A	Prupe.2G165100	MODERATE	missense_variant	p.Ala127Thr	protein_coding	2
21464033	G	A	Prupe.2G165200	MODIFIER	upstream_gene_variant	.	protein_coding	-1
21464033	G	A	Prupe.2G165000	MODIFIER	downstream_gene_variant	.	protein_coding	-1
21467962	T	A	Prupe.2G165200	LOW	synonymous_variant	p.Ile92Ile	protein_coding	2
21467962	T	A	Prupe.2G165100	MODIFIER	downstream_gene_variant	.	protein_coding	-1
21467962	T	A	Prupe.2G165300	MODIFIER	downstream_gene_variant	.	protein_coding	-1
21467962	T	A	Prupe.2G165400	MODIFIER	downstream_gene_variant	.	protein_coding	-1
21467985	G	T	Prupe.2G165200	MODERATE	missense_variant	p.Arg100Ile	protein_coding	2
21467985	G	T	Prupe.2G165100	MODIFIER	downstream_gene_variant	.	protein_coding	-1
21467985	G	T	Prupe.2G165300	MODIFIER	downstream_gene_variant	.	protein_coding	-1
21467985	G	T	Prupe.2G165400	MODIFIER	downstream_gene_variant	.	protein_coding	-1
21467989	T	A	Prupe.2G165200	LOW	synonymous_variant	p.Thr101Thr	protein_coding	2
21467989	T	A	Prupe.2G165100	MODIFIER	downstream_gene_variant	.	protein_coding	-1
21467989	T	A	Prupe.2G165300	MODIFIER	downstream_gene_variant	.	protein_coding	-1
21467989	T	A	Prupe.2G165400	MODIFIER	downstream_gene_variant	.	protein_coding	-1
21468024	G	A	Prupe.2G165200	MODERATE	missense_variant	p.Arg113His	protein_coding	2
21468024	G	A	Prupe.2G165100	MODIFIER	downstream_gene_variant	.	protein_coding	-1
21468024	G	A	Prupe.2G165300	MODIFIER	downstream_gene_variant	.	protein_coding	-1
21468024	G	A	Prupe.2G165400	MODIFIER	downstream_gene_variant	.	protein_coding	-1
21468171	A	T	Prupe.2G165200	MODERATE	missense_variant	p.Tyr162Phe	protein_coding	2
21468171	A	T	Prupe.2G165100	MODIFIER	downstream_gene_variant	.	protein_coding	-1
21468171	A	T	Prupe.2G165300	MODIFIER	downstream_gene_variant	.	protein_coding	-1
21468171	A	T	Prupe.2G165400	MODIFIER	downstream_gene_variant	.	protein_coding	-1
21468175	A	T	Prupe.2G165200	LOW	synonymous_variant	p.Ile163Ile	protein_coding	2
21468175	A	T	Prupe.2G165100	MODIFIER	downstream_gene_variant	.	protein_coding	-1
21468175	A	T	Prupe.2G165300	MODIFIER	downstream_gene_variant	.	protein_coding	-1
21468175	A	T	Prupe.2G165400	MODIFIER	downstream_gene_variant	.	protein_coding	-1
21468187	A	C	Prupe.2G165200	MODERATE	missense_variant	p.Arg167Ser	protein_coding	2
21468187	A	C	Prupe.2G165100	MODIFIER	downstream_gene_variant	.	protein_coding	-1
21468187	A	C	Prupe.2G165300	MODIFIER	downstream_gene_variant	.	protein_coding	-1
21468187	A	C	Prupe.2G165400	MODIFIER	downstream_gene_variant	.	protein_coding	-1
21468217	G	A	Prupe.2G165200	LOW	synonymous_variant	p.Thr177Thr	protein_coding	2
21468217	G	A	Prupe.2G165100	MODIFIER	downstream_gene_variant	.	protein_coding	-1
21468217	G	A	Prupe.2G165300	MODIFIER	downstream_gene_variant	.	protein_coding	-1
21468217	G	A	Prupe.2G165400	MODIFIER	downstream_gene_variant	.	protein_coding	-1
21468245	G	T	Prupe.2G165200	MODERATE	missense_variant	p.Val187Leu	protein_coding	2
21468245	G	T	Prupe.2G165100	MODIFIER	downstream_gene_variant	.	protein_coding	-1
21468245	G	T	Prupe.2G165300	MODIFIER	downstream_gene_variant	.	protein_coding	-1
21468245	G	T	Prupe.2G165400	MODIFIER	downstream_gene_variant	.	protein_coding	-1
21548921	C	G	Prupe.2G166500	MODERATE	missense_variant	p.Arg583Gly	protein_coding	7
21548921	C	G	Prupe.2G166600	MODIFIER	upstream_gene_variant	.	protein_coding	-1
21549293	T	C	Prupe.2G166500	MODERATE	missense_variant	p.Ile661Thr	protein_coding	8
21549293	T	C	Prupe.2G166600	MODIFIER	upstream_gene_variant	.	protein_coding	-1
21549328	C	G	Prupe.2G166500	MODERATE	missense_variant	p.Arg673Gly	protein_coding	8
21549328	C	G	Prupe.2G166600	MODIFIER	upstream_gene_variant	.	protein_coding	-1
21549341	C	T	Prupe.2G166500	MODERATE	missense_variant	p.Ser677Leu	protein_coding	8
21549341	C	T	Prupe.2G166600	MODIFIER	upstream_gene_variant	.	protein_coding	-1
21579729	T	C	Prupe.2G167400	MODIFIER	upstream_gene_variant	.	protein_coding	-1
21579729	T	C	Prupe.2G167300	MODIFIER	intron_variant	.	protein_coding	8
21580062	G	T	Prupe.2G167400	MODIFIER	upstream_gene_variant	.	protein_coding	-1
21580062	G	T	Prupe.2G167300	MODIFIER	intron_variant	.	protein_coding	8
21580121	G	C	Prupe.2G167400	MODIFIER	upstream_gene_variant	.	protein_coding	-1
21580121	G	C	Prupe.2G167300	MODIFIER	intron_variant	.	protein_coding	8
21580140	T	G	Prupe.2G167400	MODIFIER	upstream_gene_variant	.	protein_coding	-1
21580140	T	G	Prupe.2G167300	MODIFIER	intron_variant	.	protein_coding	8
21580973	A	T	Prupe.2G167300	MODERATE	missense_variant	p.Tyr425Phe	protein_coding	11
21580973	A	T	Prupe.2G167400	MODIFIER	upstream_gene_variant	.	protein_coding	-1
21713266	T	A	Prupe.2G169800	MODIFIER	upstream_gene_variant	.	protein_coding	-1
21713266	T	A	Prupe.2G169700	MODIFIER	intron_variant	.	protein_coding	3
21713276	T	A	Prupe.2G169800	MODIFIER	upstream_gene_variant	.	protein_coding	-1
21713276	T	A	Prupe.2G169700	MODIFIER	intron_variant	.	protein_coding	3
21719105	A	G	Prupe.2G169900	LOW	synonymous_variant	p.Ser671Ser	protein_coding	9
21719105	A	G	Prupe.2G169900	MODIFIER	3_prime_UTR_variant	.	protein_coding	9
21719105	A	G	Prupe.2G169800	MODIFIER	downstream_gene_variant	.	protein_coding	-1
21719365	A	C	Prupe.2G169800	MODIFIER	downstream_gene_variant	.	protein_coding	-1
21719365	A	C	Prupe.2G169900	MODIFIER	intron_variant	.	protein_coding	8
21719746	G	A	Prupe.2G169800	MODIFIER	downstream_gene_variant	.	protein_coding	-1
21719746	G	A	Prupe.2G169900	MODIFIER	intron_variant	.	protein_coding	7
21720258	C	T	Prupe.2G169900	LOW	synonymous_variant	p.Leu468Leu	protein_coding	7
21720258	C	T	Prupe.2G169800	MODIFIER	downstream_gene_variant	.	protein_coding	-1
21720258	C	T	Prupe.2G170000	MODIFIER	downstream_gene_variant	.	protein_coding	-1
21720293	C	T	Prupe.2G169900	LOW	splice_region_variant&intron_variant	.	protein_coding	6
21720293	C	T	Prupe.2G169800	MODIFIER	downstream_gene_variant	.	protein_coding	-1
21720293	C	T	Prupe.2G170000	MODIFIER	downstream_gene_variant	.	protein_coding	-1
21721122	G	A	Prupe.2G169800	MODIFIER	downstream_gene_variant	.	protein_coding	-1
21721122	G	A	Prupe.2G170000	MODIFIER	downstream_gene_variant	.	protein_coding	-1
21721122	G	A	Prupe.2G169900	MODIFIER	intron_variant	.	protein_coding	4
21721297	T	C	Prupe.2G169800	MODIFIER	downstream_gene_variant	.	protein_coding	-1
21721297	T	C	Prupe.2G170000	MODIFIER	downstream_gene_variant	.	protein_coding	-1
21721297	T	C	Prupe.2G169900	MODIFIER	intron_variant	.	protein_coding	4
21738484	G	A	Prupe.2G170200	MODIFIER	downstream_gene_variant	.	protein_coding	-1
21738484	G	A	Prupe.2G170100	MODIFIER	intron_variant	.	protein_coding	1
21738503	T	C	Prupe.2G170200	MODIFIER	downstream_gene_variant	.	protein_coding	-1
21738503	T	C	Prupe.2G170100	MODIFIER	intron_variant	.	protein_coding	1
21738517	T	G	Prupe.2G170200	MODIFIER	downstream_gene_variant	.	protein_coding	-1
21738517	T	G	Prupe.2G170100	MODIFIER	intron_variant	.	protein_coding	1
21738535	T	A	Prupe.2G170200	MODIFIER	downstream_gene_variant	.	protein_coding	-1
21738535	T	A	Prupe.2G170100	MODIFIER	intron_variant	.	protein_coding	1
21738550	T	C	Prupe.2G170200	MODIFIER	downstream_gene_variant	.	protein_coding	-1
21738550	T	C	Prupe.2G170100	MODIFIER	intron_variant	.	protein_coding	1
21738790	T	A	Prupe.2G170200	MODIFIER	downstream_gene_variant	.	protein_coding	-1
21738790	T	A	Prupe.2G170100	MODIFIER	intron_variant	.	protein_coding	1
21738852	C	T	Prupe.2G170100	MODERATE	missense_variant	p.Thr57Ile	protein_coding	2
21738852	C	T	Prupe.2G170100	MODIFIER	5_prime_UTR_variant	.	protein_coding	2
21738852	C	T	Prupe.2G170200	MODIFIER	downstream_gene_variant	.	protein_coding	-1
21752560	G	T	Prupe.2G170400	LOW	synonymous_variant	p.Ser73Ser	protein_coding	1
21752560	G	T	Prupe.2G170300	MODIFIER	downstream_gene_variant	.	protein_coding	-1
21752560	G	T	Prupe.2G170500	MODIFIER	downstream_gene_variant	.	protein_coding	-1
21780551	G	T	Prupe.2G170600	MODIFIER	downstream_gene_variant	.	protein_coding	-1
21780551	G	T	Prupe.2G170700	MODIFIER	intron_variant	.	protein_coding	2
21780553	A	G	Prupe.2G170600	MODIFIER	downstream_gene_variant	.	protein_coding	-1
21780553	A	G	Prupe.2G170700	MODIFIER	intron_variant	.	protein_coding	2
21788381	C	T	Prupe.2G170800	LOW	synonymous_variant	p.Ala323Ala	protein_coding	9
21788606	A	T	Prupe.2G170800	MODIFIER	intron_variant	.	protein_coding	8
21788681	G	A	Prupe.2G170800	LOW	splice_region_variant&synonymous_variant	p.Gly279Gly	protein_coding	8
21816307	T	C	Prupe.2G170900	MODIFIER	downstream_gene_variant	.	protein_coding	-1
21816307	T	C	Prupe.2G171100	MODIFIER	downstream_gene_variant	.	protein_coding	-1
21816307	T	C	Prupe.2G171000	MODIFIER	intron_variant	.	protein_coding	3
21870001	T	G	Prupe.2G171800	MODIFIER	upstream_gene_variant	.	protein_coding	-1
21870001	T	G	Prupe.2G171900	MODIFIER	downstream_gene_variant	.	protein_coding	-1
21870001	T	G	Prupe.2G172000	MODIFIER	downstream_gene_variant	.	protein_coding	-1
21870001	T	G	Prupe.2G171800-Prupe.2G171900	MODIFIER	intergenic_region	.	.	-1
21870005	T	C	Prupe.2G171800	MODIFIER	upstream_gene_variant	.	protein_coding	-1
21870005	T	C	Prupe.2G171900	MODIFIER	downstream_gene_variant	.	protein_coding	-1
21870005	T	C	Prupe.2G172000	MODIFIER	downstream_gene_variant	.	protein_coding	-1
21870005	T	C	Prupe.2G171800-Prupe.2G171900	MODIFIER	intergenic_region	.	.	-1
21870057	G	T	Prupe.2G171800	MODIFIER	upstream_gene_variant	.	protein_coding	-1
21870057	G	T	Prupe.2G171900	MODIFIER	downstream_gene_variant	.	protein_coding	-1
21870057	G	T	Prupe.2G172000	MODIFIER	downstream_gene_variant	.	protein_coding	-1
21870057	G	T	Prupe.2G171800-Prupe.2G171900	MODIFIER	intergenic_region	.	.	-1
21945088	G	A	Prupe.2G172900	LOW	synonymous_variant	p.Ser28Ser	protein_coding	1
21945088	G	A	Prupe.2G172900	MODIFIER	5_prime_UTR_variant	.	protein_coding	1
21945088	G	A	Prupe.2G172900	MODIFIER	upstream_gene_variant	.	protein_coding	-1
21945088	G	A	Prupe.2G172800	MODIFIER	downstream_gene_variant	.	protein_coding	-1
21945097	A	C	Prupe.2G172900	LOW	synonymous_variant	p.Ser31Ser	protein_coding	1
21945097	A	C	Prupe.2G172900	MODIFIER	5_prime_UTR_variant	.	protein_coding	1
21945097	A	C	Prupe.2G172900	MODIFIER	upstream_gene_variant	.	protein_coding	-1
21945097	A	C	Prupe.2G172800	MODIFIER	downstream_gene_variant	.	protein_coding	-1
21955148	A	G	Prupe.2G172900	MODERATE	missense_variant	p.Ser2213Gly	protein_coding	14
21955148	A	G	Prupe.2G172900	MODERATE	missense_variant	p.Ser1653Gly	protein_coding	14
21955148	A	G	Prupe.2G172900	MODERATE	missense_variant	p.Ser2145Gly	protein_coding	14
21955148	A	G	Prupe.2G172900	MODERATE	missense_variant	p.Ser2102Gly	protein_coding	14
21955148	A	G	Prupe.2G173000	MODIFIER	downstream_gene_variant	.	protein_coding	-1
21955207	G	A	Prupe.2G172900	LOW	synonymous_variant	p.Ser2232Ser	protein_coding	14
21955207	G	A	Prupe.2G172900	LOW	synonymous_variant	p.Ser1672Ser	protein_coding	14
21955207	G	A	Prupe.2G172900	LOW	synonymous_variant	p.Ser2164Ser	protein_coding	14
21955207	G	A	Prupe.2G172900	LOW	synonymous_variant	p.Ser2121Ser	protein_coding	14
21955207	G	A	Prupe.2G173000	MODIFIER	downstream_gene_variant	.	protein_coding	-1
22010565	C	A	Prupe.2G173800	MODIFIER	upstream_gene_variant	.	protein_coding	-1
22010565	C	A	Prupe.2G173900	MODIFIER	upstream_gene_variant	.	protein_coding	-1
22010565	C	A	Prupe.2G173800-Prupe.2G173900	MODIFIER	intergenic_region	.	.	-1
22010605	A	T	Prupe.2G173800	MODIFIER	upstream_gene_variant	.	protein_coding	-1
22010605	A	T	Prupe.2G173900	MODIFIER	upstream_gene_variant	.	protein_coding	-1
22010605	A	T	Prupe.2G173800-Prupe.2G173900	MODIFIER	intergenic_region	.	.	-1
22014243	T	C	Prupe.2G173800	MODIFIER	upstream_gene_variant	.	protein_coding	-1
22014243	T	C	Prupe.2G174000	MODIFIER	upstream_gene_variant	.	protein_coding	-1
22014243	T	C	Prupe.2G173900	MODIFIER	intron_variant	.	protein_coding	1
22018193	T	A	Prupe.2G174000	MODIFIER	upstream_gene_variant	.	protein_coding	-1
22018193	T	A	Prupe.2G173900	MODIFIER	downstream_gene_variant	.	protein_coding	-1
22018193	T	A	Prupe.2G174100	MODIFIER	downstream_gene_variant	.	protein_coding	-1
22018193	T	A	Prupe.2G174000	MODIFIER	intron_variant	.	protein_coding	2
22018413	A	C	Prupe.2G174000	MODIFIER	upstream_gene_variant	.	protein_coding	-1
22018413	A	C	Prupe.2G173900	MODIFIER	downstream_gene_variant	.	protein_coding	-1
22018413	A	C	Prupe.2G174100	MODIFIER	downstream_gene_variant	.	protein_coding	-1
22018413	A	C	Prupe.2G174000	MODIFIER	intron_variant	.	protein_coding	3
22019520	A	T	Prupe.2G174000	LOW	synonymous_variant	p.Pro211Pro	protein_coding	8
22019520	A	T	Prupe.2G174000	LOW	synonymous_variant	p.Pro157Pro	protein_coding	2
22019520	A	T	Prupe.2G173900	MODIFIER	downstream_gene_variant	.	protein_coding	-1
22019520	A	T	Prupe.2G174100	MODIFIER	downstream_gene_variant	.	protein_coding	-1
22020376	C	T	Prupe.2G173900	MODIFIER	downstream_gene_variant	.	protein_coding	-1
22020376	C	T	Prupe.2G174000	MODIFIER	downstream_gene_variant	.	protein_coding	-1
22020376	C	T	Prupe.2G174100	MODIFIER	downstream_gene_variant	.	protein_coding	-1
22020376	C	T	Prupe.2G174000-Prupe.2G174100	MODIFIER	intergenic_region	.	.	-1
22020391	C	A	Prupe.2G173900	MODIFIER	downstream_gene_variant	.	protein_coding	-1
22020391	C	A	Prupe.2G174000	MODIFIER	downstream_gene_variant	.	protein_coding	-1
22020391	C	A	Prupe.2G174100	MODIFIER	downstream_gene_variant	.	protein_coding	-1
22020391	C	A	Prupe.2G174000-Prupe.2G174100	MODIFIER	intergenic_region	.	.	-1
22020396	T	C	Prupe.2G173900	MODIFIER	downstream_gene_variant	.	protein_coding	-1
22020396	T	C	Prupe.2G174000	MODIFIER	downstream_gene_variant	.	protein_coding	-1
22020396	T	C	Prupe.2G174100	MODIFIER	downstream_gene_variant	.	protein_coding	-1
22020396	T	C	Prupe.2G174000-Prupe.2G174100	MODIFIER	intergenic_region	.	.	-1
22020403	G	A	Prupe.2G173900	MODIFIER	downstream_gene_variant	.	protein_coding	-1
22020403	G	A	Prupe.2G174000	MODIFIER	downstream_gene_variant	.	protein_coding	-1
22020403	G	A	Prupe.2G174100	MODIFIER	downstream_gene_variant	.	protein_coding	-1
22020403	G	A	Prupe.2G174000-Prupe.2G174100	MODIFIER	intergenic_region	.	.	-1
22020481	T	C	Prupe.2G173900	MODIFIER	downstream_gene_variant	.	protein_coding	-1
22020481	T	C	Prupe.2G174000	MODIFIER	downstream_gene_variant	.	protein_coding	-1
22020481	T	C	Prupe.2G174100	MODIFIER	downstream_gene_variant	.	protein_coding	-1
22020481	T	C	Prupe.2G174000-Prupe.2G174100	MODIFIER	intergenic_region	.	.	-1
22044459	A	G	Prupe.2G174300	MODIFIER	upstream_gene_variant	.	protein_coding	-1
22044459	A	G	Prupe.2G174200	MODIFIER	downstream_gene_variant	.	protein_coding	-1
22044459	A	G	Prupe.2G174400	MODIFIER	downstream_gene_variant	.	protein_coding	-1
22044459	A	G	Prupe.2G174500	MODIFIER	downstream_gene_variant	.	protein_coding	-1
22044459	A	G	Prupe.2G174300-Prupe.2G174400	MODIFIER	intergenic_region	.	.	-1
22044498	A	G	Prupe.2G174300	MODIFIER	upstream_gene_variant	.	protein_coding	-1
22044498	A	G	Prupe.2G174200	MODIFIER	downstream_gene_variant	.	protein_coding	-1
22044498	A	G	Prupe.2G174400	MODIFIER	downstream_gene_variant	.	protein_coding	-1
22044498	A	G	Prupe.2G174500	MODIFIER	downstream_gene_variant	.	protein_coding	-1
22044498	A	G	Prupe.2G174300-Prupe.2G174400	MODIFIER	intergenic_region	.	.	-1
22044521	G	A	Prupe.2G174300	MODIFIER	upstream_gene_variant	.	protein_coding	-1
22044521	G	A	Prupe.2G174200	MODIFIER	downstream_gene_variant	.	protein_coding	-1
22044521	G	A	Prupe.2G174400	MODIFIER	downstream_gene_variant	.	protein_coding	-1
22044521	G	A	Prupe.2G174500	MODIFIER	downstream_gene_variant	.	protein_coding	-1
22044521	G	A	Prupe.2G174300-Prupe.2G174400	MODIFIER	intergenic_region	.	.	-1
22044526	T	C	Prupe.2G174300	MODIFIER	upstream_gene_variant	.	protein_coding	-1
22044526	T	C	Prupe.2G174200	MODIFIER	downstream_gene_variant	.	protein_coding	-1
22044526	T	C	Prupe.2G174400	MODIFIER	downstream_gene_variant	.	protein_coding	-1
22044526	T	C	Prupe.2G174500	MODIFIER	downstream_gene_variant	.	protein_coding	-1
22044526	T	C	Prupe.2G174300-Prupe.2G174400	MODIFIER	intergenic_region	.	.	-1
22047734	G	T	Prupe.2G174300	MODIFIER	upstream_gene_variant	.	protein_coding	-1
22047734	G	T	Prupe.2G174400	MODIFIER	upstream_gene_variant	.	protein_coding	-1
22047734	G	T	Prupe.2G174600	MODIFIER	upstream_gene_variant	.	protein_coding	-1
22047734	G	T	Prupe.2G174500	MODIFIER	intron_variant	.	protein_coding	2
22047818	G	T	Prupe.2G174300	MODIFIER	upstream_gene_variant	.	protein_coding	-1
22047818	G	T	Prupe.2G174400	MODIFIER	upstream_gene_variant	.	protein_coding	-1
22047818	G	T	Prupe.2G174600	MODIFIER	upstream_gene_variant	.	protein_coding	-1
22047818	G	T	Prupe.2G174500	MODIFIER	intron_variant	.	protein_coding	2
22047822	C	A	Prupe.2G174300	MODIFIER	upstream_gene_variant	.	protein_coding	-1
22047822	C	A	Prupe.2G174400	MODIFIER	upstream_gene_variant	.	protein_coding	-1
22047822	C	A	Prupe.2G174600	MODIFIER	upstream_gene_variant	.	protein_coding	-1
22047822	C	A	Prupe.2G174500	MODIFIER	intron_variant	.	protein_coding	2
22047824	C	T	Prupe.2G174300	MODIFIER	upstream_gene_variant	.	protein_coding	-1
22047824	C	T	Prupe.2G174400	MODIFIER	upstream_gene_variant	.	protein_coding	-1
22047824	C	T	Prupe.2G174600	MODIFIER	upstream_gene_variant	.	protein_coding	-1
22047824	C	T	Prupe.2G174500	MODIFIER	intron_variant	.	protein_coding	2
22047836	C	T	Prupe.2G174300	MODIFIER	upstream_gene_variant	.	protein_coding	-1
22047836	C	T	Prupe.2G174400	MODIFIER	upstream_gene_variant	.	protein_coding	-1
22047836	C	T	Prupe.2G174600	MODIFIER	upstream_gene_variant	.	protein_coding	-1
22047836	C	T	Prupe.2G174500	MODIFIER	intron_variant	.	protein_coding	2
22047841	T	G	Prupe.2G174300	MODIFIER	upstream_gene_variant	.	protein_coding	-1
22047841	T	G	Prupe.2G174400	MODIFIER	upstream_gene_variant	.	protein_coding	-1
22047841	T	G	Prupe.2G174600	MODIFIER	upstream_gene_variant	.	protein_coding	-1
22047841	T	G	Prupe.2G174500	MODIFIER	intron_variant	.	protein_coding	2
22047870	A	C	Prupe.2G174500	LOW	splice_region_variant&intron_variant	.	protein_coding	2
22047870	A	C	Prupe.2G174300	MODIFIER	upstream_gene_variant	.	protein_coding	-1
22047870	A	C	Prupe.2G174400	MODIFIER	upstream_gene_variant	.	protein_coding	-1
22047870	A	C	Prupe.2G174600	MODIFIER	upstream_gene_variant	.	protein_coding	-1
22050024	T	C	Prupe.2G174500	LOW	synonymous_variant	p.Gln10Gln	protein_coding	1
22050024	T	C	Prupe.2G174400	MODIFIER	upstream_gene_variant	.	protein_coding	-1
22050024	T	C	Prupe.2G174600	MODIFIER	upstream_gene_variant	.	protein_coding	-1
22050029	T	C	Prupe.2G174500	MODERATE	missense_variant	p.Thr9Ala	protein_coding	1
22050029	T	C	Prupe.2G174400	MODIFIER	upstream_gene_variant	.	protein_coding	-1
22050029	T	C	Prupe.2G174600	MODIFIER	upstream_gene_variant	.	protein_coding	-1
22050176	G	C	Prupe.2G174500	MODIFIER	5_prime_UTR_variant	.	protein_coding	1
22050176	G	C	Prupe.2G174400	MODIFIER	upstream_gene_variant	.	protein_coding	-1
22050176	G	C	Prupe.2G174600	MODIFIER	upstream_gene_variant	.	protein_coding	-1
22108804	C	T	Prupe.2G175300	LOW	synonymous_variant	p.Lys301Lys	protein_coding	2
22108804	C	T	Prupe.2G175200	MODIFIER	upstream_gene_variant	.	protein_coding	-1
22108804	C	T	Prupe.2G175400	MODIFIER	downstream_gene_variant	.	protein_coding	-1
22108840	G	T	Prupe.2G175300	LOW	synonymous_variant	p.Arg289Arg	protein_coding	2
22108840	G	T	Prupe.2G175200	MODIFIER	upstream_gene_variant	.	protein_coding	-1
22108840	G	T	Prupe.2G175400	MODIFIER	downstream_gene_variant	.	protein_coding	-1
22108841	C	T	Prupe.2G175300	MODERATE	missense_variant	p.Arg289His	protein_coding	2
22108841	C	T	Prupe.2G175200	MODIFIER	upstream_gene_variant	.	protein_coding	-1
22108841	C	T	Prupe.2G175400	MODIFIER	downstream_gene_variant	.	protein_coding	-1
22109092	G	A	Prupe.2G175300	LOW	synonymous_variant	p.Ser205Ser	protein_coding	2
22109092	G	A	Prupe.2G175200	MODIFIER	upstream_gene_variant	.	protein_coding	-1
22109092	G	A	Prupe.2G175400	MODIFIER	downstream_gene_variant	.	protein_coding	-1
22109551	C	T	Prupe.2G175300	LOW	synonymous_variant	p.Pro52Pro	protein_coding	2
22109551	C	T	Prupe.2G175200	MODIFIER	upstream_gene_variant	.	protein_coding	-1
22109551	C	T	Prupe.2G175400	MODIFIER	downstream_gene_variant	.	protein_coding	-1
22112761	C	A	Prupe.2G175300	MODIFIER	upstream_gene_variant	.	protein_coding	-1
22112761	C	A	Prupe.2G175400	MODIFIER	downstream_gene_variant	.	protein_coding	-1
22112761	C	A	Prupe.2G175300-Prupe.2G175400	MODIFIER	intergenic_region	.	.	-1
22112788	A	T	Prupe.2G175300	MODIFIER	upstream_gene_variant	.	protein_coding	-1
22112788	A	T	Prupe.2G175400	MODIFIER	downstream_gene_variant	.	protein_coding	-1
22112788	A	T	Prupe.2G175300-Prupe.2G175400	MODIFIER	intergenic_region	.	.	-1
22112842	C	T	Prupe.2G175300	MODIFIER	upstream_gene_variant	.	protein_coding	-1
22112842	C	T	Prupe.2G175400	MODIFIER	downstream_gene_variant	.	protein_coding	-1
22112842	C	T	Prupe.2G175300-Prupe.2G175400	MODIFIER	intergenic_region	.	.	-1
22112843	A	T	Prupe.2G175300	MODIFIER	upstream_gene_variant	.	protein_coding	-1
22112843	A	T	Prupe.2G175400	MODIFIER	downstream_gene_variant	.	protein_coding	-1
22112843	A	T	Prupe.2G175300-Prupe.2G175400	MODIFIER	intergenic_region	.	.	-1
22112845	A	C	Prupe.2G175300	MODIFIER	upstream_gene_variant	.	protein_coding	-1
22112845	A	C	Prupe.2G175400	MODIFIER	downstream_gene_variant	.	protein_coding	-1
22112845	A	C	Prupe.2G175300-Prupe.2G175400	MODIFIER	intergenic_region	.	.	-1
22127673	G	T	Prupe.2G175600	MODIFIER	5_prime_UTR_variant	.	protein_coding	1
22127673	G	T	Prupe.2G175500	MODIFIER	upstream_gene_variant	.	protein_coding	-1
22127673	G	T	Prupe.2G175700	MODIFIER	downstream_gene_variant	.	protein_coding	-1
22127673	G	T	Prupe.2G175800	MODIFIER	downstream_gene_variant	.	protein_coding	-1
22127676	G	T	Prupe.2G175600	MODIFIER	5_prime_UTR_variant	.	protein_coding	1
22127676	G	T	Prupe.2G175500	MODIFIER	upstream_gene_variant	.	protein_coding	-1
22127676	G	T	Prupe.2G175700	MODIFIER	downstream_gene_variant	.	protein_coding	-1
22127676	G	T	Prupe.2G175800	MODIFIER	downstream_gene_variant	.	protein_coding	-1
22165195	A	G	Prupe.2G176300	LOW	synonymous_variant	p.Val552Val	protein_coding	4
22165195	A	G	Prupe.2G176200	MODIFIER	upstream_gene_variant	.	protein_coding	-1
22242141	C	G	Prupe.2G177400	MODERATE	missense_variant	p.Thr28Ser	protein_coding	1
22242141	C	G	Prupe.2G177200	MODIFIER	downstream_gene_variant	.	protein_coding	-1
22242141	C	G	Prupe.2G177300	MODIFIER	downstream_gene_variant	.	protein_coding	-1
22242141	C	G	Prupe.2G177500	MODIFIER	downstream_gene_variant	.	protein_coding	-1
22254726	T	G	Prupe.2G177700	MODERATE	missense_variant	p.Ser9Ala	protein_coding	1
22254726	T	G	Prupe.2G177600	MODIFIER	upstream_gene_variant	.	protein_coding	-1
22254726	T	G	Prupe.2G177800	MODIFIER	upstream_gene_variant	.	protein_coding	-1
22254797	C	T	Prupe.2G177700	LOW	synonymous_variant	p.Phe32Phe	protein_coding	1
22254797	C	T	Prupe.2G177600	MODIFIER	upstream_gene_variant	.	protein_coding	-1
22254797	C	T	Prupe.2G177800	MODIFIER	upstream_gene_variant	.	protein_coding	-1
22254799	T	G	Prupe.2G177700	MODERATE	missense_variant	p.Leu33Arg	protein_coding	1
22254799	T	G	Prupe.2G177600	MODIFIER	upstream_gene_variant	.	protein_coding	-1
22254799	T	G	Prupe.2G177800	MODIFIER	upstream_gene_variant	.	protein_coding	-1
22254814	A	G	Prupe.2G177700	MODERATE	missense_variant	p.His38Arg	protein_coding	1
22254814	A	G	Prupe.2G177600	MODIFIER	upstream_gene_variant	.	protein_coding	-1
22254814	A	G	Prupe.2G177800	MODIFIER	upstream_gene_variant	.	protein_coding	-1
22257448	T	A	Prupe.2G177800	MODIFIER	upstream_gene_variant	.	protein_coding	-1
22257448	T	A	Prupe.2G177900	MODIFIER	downstream_gene_variant	.	protein_coding	-1
22257448	T	A	Prupe.2G177700	MODIFIER	intron_variant	.	protein_coding	7
22257490	G	T	Prupe.2G177800	MODIFIER	upstream_gene_variant	.	protein_coding	-1
22257490	G	T	Prupe.2G177900	MODIFIER	downstream_gene_variant	.	protein_coding	-1
22257490	G	T	Prupe.2G177700	MODIFIER	intron_variant	.	protein_coding	7
22257556	A	T	Prupe.2G177700	MODERATE	missense_variant	p.Asn389Ile	protein_coding	8
22257556	A	T	Prupe.2G177800	MODIFIER	upstream_gene_variant	.	protein_coding	-1
22257556	A	T	Prupe.2G177900	MODIFIER	downstream_gene_variant	.	protein_coding	-1
22258327	C	A	Prupe.2G177800	MODIFIER	upstream_gene_variant	.	protein_coding	-1
22258327	C	A	Prupe.2G177900	MODIFIER	downstream_gene_variant	.	protein_coding	-1
22258327	C	A	Prupe.2G177700	MODIFIER	intron_variant	.	protein_coding	9
22258335	A	C	Prupe.2G177800	MODIFIER	upstream_gene_variant	.	protein_coding	-1
22258335	A	C	Prupe.2G177900	MODIFIER	downstream_gene_variant	.	protein_coding	-1
22258335	A	C	Prupe.2G177700	MODIFIER	intron_variant	.	protein_coding	9
22283722	A	G	Prupe.2G178700	LOW	synonymous_variant	p.Pro234Pro	protein_coding	1
22283722	A	G	Prupe.2G178800	MODIFIER	upstream_gene_variant	.	protein_coding	-1
22283722	A	G	Prupe.2G178500	MODIFIER	downstream_gene_variant	.	protein_coding	-1
22283722	A	G	Prupe.2G178600	MODIFIER	downstream_gene_variant	.	protein_coding	-1
22299548	G	T	Prupe.2G178900	MODIFIER	upstream_gene_variant	.	protein_coding	-1
22299548	G	T	Prupe.2G179000	MODIFIER	downstream_gene_variant	.	protein_coding	-1
22299548	G	T	Prupe.2G179100	MODIFIER	downstream_gene_variant	.	protein_coding	-1
22299548	G	T	Prupe.2G179200	MODIFIER	downstream_gene_variant	.	protein_coding	-1
22299548	G	T	Prupe.2G179000-Prupe.2G179100	MODIFIER	intergenic_region	.	.	-1
22299558	T	C	Prupe.2G178900	MODIFIER	upstream_gene_variant	.	protein_coding	-1
22299558	T	C	Prupe.2G179000	MODIFIER	downstream_gene_variant	.	protein_coding	-1
22299558	T	C	Prupe.2G179100	MODIFIER	downstream_gene_variant	.	protein_coding	-1
22299558	T	C	Prupe.2G179200	MODIFIER	downstream_gene_variant	.	protein_coding	-1
22299558	T	C	Prupe.2G179000-Prupe.2G179100	MODIFIER	intergenic_region	.	.	-1
22299572	A	G	Prupe.2G178900	MODIFIER	upstream_gene_variant	.	protein_coding	-1
22299572	A	G	Prupe.2G179000	MODIFIER	downstream_gene_variant	.	protein_coding	-1
22299572	A	G	Prupe.2G179100	MODIFIER	downstream_gene_variant	.	protein_coding	-1
22299572	A	G	Prupe.2G179200	MODIFIER	downstream_gene_variant	.	protein_coding	-1
22299572	A	G	Prupe.2G179000-Prupe.2G179100	MODIFIER	intergenic_region	.	.	-1
22299574	C	G	Prupe.2G178900	MODIFIER	upstream_gene_variant	.	protein_coding	-1
22299574	C	G	Prupe.2G179000	MODIFIER	downstream_gene_variant	.	protein_coding	-1
22299574	C	G	Prupe.2G179100	MODIFIER	downstream_gene_variant	.	protein_coding	-1
22299574	C	G	Prupe.2G179200	MODIFIER	downstream_gene_variant	.	protein_coding	-1
22299574	C	G	Prupe.2G179000-Prupe.2G179100	MODIFIER	intergenic_region	.	.	-1
22299609	T	A	Prupe.2G178900	MODIFIER	upstream_gene_variant	.	protein_coding	-1
22299609	T	A	Prupe.2G179000	MODIFIER	downstream_gene_variant	.	protein_coding	-1
22299609	T	A	Prupe.2G179100	MODIFIER	downstream_gene_variant	.	protein_coding	-1
22299609	T	A	Prupe.2G179200	MODIFIER	downstream_gene_variant	.	protein_coding	-1
22299609	T	A	Prupe.2G179000-Prupe.2G179100	MODIFIER	intergenic_region	.	.	-1
22299610	T	A	Prupe.2G178900	MODIFIER	upstream_gene_variant	.	protein_coding	-1
22299610	T	A	Prupe.2G179000	MODIFIER	downstream_gene_variant	.	protein_coding	-1
22299610	T	A	Prupe.2G179100	MODIFIER	downstream_gene_variant	.	protein_coding	-1
22299610	T	A	Prupe.2G179200	MODIFIER	downstream_gene_variant	.	protein_coding	-1
22299610	T	A	Prupe.2G179000-Prupe.2G179100	MODIFIER	intergenic_region	.	.	-1
22299614	C	T	Prupe.2G178900	MODIFIER	upstream_gene_variant	.	protein_coding	-1
22299614	C	T	Prupe.2G179000	MODIFIER	downstream_gene_variant	.	protein_coding	-1
22299614	C	T	Prupe.2G179100	MODIFIER	downstream_gene_variant	.	protein_coding	-1
22299614	C	T	Prupe.2G179200	MODIFIER	downstream_gene_variant	.	protein_coding	-1
22299614	C	T	Prupe.2G179000-Prupe.2G179100	MODIFIER	intergenic_region	.	.	-1
22299624	C	T	Prupe.2G178900	MODIFIER	upstream_gene_variant	.	protein_coding	-1
22299624	C	T	Prupe.2G179000	MODIFIER	downstream_gene_variant	.	protein_coding	-1
22299624	C	T	Prupe.2G179100	MODIFIER	downstream_gene_variant	.	protein_coding	-1
22299624	C	T	Prupe.2G179200	MODIFIER	downstream_gene_variant	.	protein_coding	-1
22299624	C	T	Prupe.2G179000-Prupe.2G179100	MODIFIER	intergenic_region	.	.	-1
22299822	A	T	Prupe.2G179100	MODIFIER	3_prime_UTR_variant	.	protein_coding	8
22299822	A	T	Prupe.2G179100	MODIFIER	3_prime_UTR_variant	.	protein_coding	9
22299822	A	T	Prupe.2G178900	MODIFIER	upstream_gene_variant	.	protein_coding	-1
22299822	A	T	Prupe.2G179000	MODIFIER	downstream_gene_variant	.	protein_coding	-1
22299822	A	T	Prupe.2G179200	MODIFIER	downstream_gene_variant	.	protein_coding	-1
22305365	A	G	Prupe.2G179200	MODIFIER	5_prime_UTR_variant	.	protein_coding	1
22305365	A	G	Prupe.2G179100	MODIFIER	upstream_gene_variant	.	protein_coding	-1
22305365	A	G	Prupe.2G179300	MODIFIER	upstream_gene_variant	.	protein_coding	-1
22305365	A	G	Prupe.2G179200	MODIFIER	intron_variant	.	protein_coding	1
22332798	G	T	Prupe.2G179700	MODIFIER	downstream_gene_variant	.	protein_coding	-1
22332798	G	T	Prupe.2G179800	MODIFIER	intron_variant	.	protein_coding	4
22332798	G	T	Prupe.2G179800	MODIFIER	intron_variant	.	protein_coding	3
22332798	G	T	Prupe.2G179800	MODIFIER	intron_variant	.	protein_coding	1
22332817	C	T	Prupe.2G179700	MODIFIER	downstream_gene_variant	.	protein_coding	-1
22332817	C	T	Prupe.2G179800	MODIFIER	intron_variant	.	protein_coding	4
22332817	C	T	Prupe.2G179800	MODIFIER	intron_variant	.	protein_coding	3
22332817	C	T	Prupe.2G179800	MODIFIER	intron_variant	.	protein_coding	1
22376863	G	A	Prupe.2G180400	LOW	synonymous_variant	p.Glu46Glu	protein_coding	1
22376942	C	G	Prupe.2G180400	MODERATE	missense_variant	p.Pro73Ala	protein_coding	1
22377655	T	C	Prupe.2G180500	MODIFIER	upstream_gene_variant	.	protein_coding	-1
22377655	T	C	Prupe.2G180400	MODIFIER	intron_variant	.	protein_coding	1
22377920	G	C	Prupe.2G180400	LOW	synonymous_variant	p.Ala361Ala	protein_coding	2
22377920	G	C	Prupe.2G180500	MODIFIER	upstream_gene_variant	.	protein_coding	-1
22377923	T	G	Prupe.2G180400	MODERATE	missense_variant	p.Ser362Arg	protein_coding	2
22377923	T	G	Prupe.2G180500	MODIFIER	upstream_gene_variant	.	protein_coding	-1
22377944	G	T	Prupe.2G180400	MODERATE	missense_variant	p.Met369Ile	protein_coding	2
22377944	G	T	Prupe.2G180500	MODIFIER	upstream_gene_variant	.	protein_coding	-1
22377948	C	G	Prupe.2G180400	MODERATE	missense_variant	p.Gln371Glu	protein_coding	2
22377948	C	G	Prupe.2G180500	MODIFIER	upstream_gene_variant	.	protein_coding	-1
22380115	G	A	Prupe.2G180500	MODIFIER	upstream_gene_variant	.	protein_coding	-1
22380115	G	A	Prupe.2G180400	MODIFIER	downstream_gene_variant	.	protein_coding	-1
22380115	G	A	Prupe.2G180400-Prupe.2G180500	MODIFIER	intergenic_region	.	.	-1
22380154	C	T	Prupe.2G180500	MODIFIER	upstream_gene_variant	.	protein_coding	-1
22380154	C	T	Prupe.2G180400	MODIFIER	downstream_gene_variant	.	protein_coding	-1
22380154	C	T	Prupe.2G180400-Prupe.2G180500	MODIFIER	intergenic_region	.	.	-1
22407477	T	G	Prupe.2G180900	MODERATE	missense_variant	p.Val56Gly	protein_coding	1
22407477	T	G	Prupe.2G181000	MODIFIER	upstream_gene_variant	.	protein_coding	-1
22441809	C	G	Prupe.2G181600	MODERATE	missense_variant	p.Ser234Thr	protein_coding	1
22441809	C	G	Prupe.2G181500	MODIFIER	upstream_gene_variant	.	protein_coding	-1
22441809	C	G	Prupe.2G181700	MODIFIER	upstream_gene_variant	.	protein_coding	-1
22441843	C	G	Prupe.2G181600	MODERATE	missense_variant	p.Ala223Pro	protein_coding	1
22441843	C	G	Prupe.2G181500	MODIFIER	upstream_gene_variant	.	protein_coding	-1
22441843	C	G	Prupe.2G181700	MODIFIER	upstream_gene_variant	.	protein_coding	-1
22480046	A	G	Prupe.2G182100	LOW	synonymous_variant	p.Gly513Gly	protein_coding	3
22480046	A	G	Prupe.2G182100	LOW	synonymous_variant	p.Gly471Gly	protein_coding	2
22480046	A	G	Prupe.2G182100	LOW	synonymous_variant	p.Gly294Gly	protein_coding	3
22480046	A	G	Prupe.2G182200	MODIFIER	upstream_gene_variant	.	protein_coding	-1
22480325	A	G	Prupe.2G182100	LOW	synonymous_variant	p.Val606Val	protein_coding	3
22480325	A	G	Prupe.2G182100	LOW	synonymous_variant	p.Val564Val	protein_coding	2
22480325	A	G	Prupe.2G182100	LOW	synonymous_variant	p.Val387Val	protein_coding	3
22480325	A	G	Prupe.2G182200	MODIFIER	upstream_gene_variant	.	protein_coding	-1
22496872	T	A	Prupe.2G182500	MODIFIER	upstream_gene_variant	.	protein_coding	-1
22496872	T	A	Prupe.2G182400	MODIFIER	downstream_gene_variant	.	protein_coding	-1
22496872	T	A	Prupe.2G182300	MODIFIER	intron_variant	.	protein_coding	2
22496875	G	T	Prupe.2G182500	MODIFIER	upstream_gene_variant	.	protein_coding	-1
22496875	G	T	Prupe.2G182400	MODIFIER	downstream_gene_variant	.	protein_coding	-1
22496875	G	T	Prupe.2G182300	MODIFIER	intron_variant	.	protein_coding	2
22509398	C	T	Prupe.2G182600	MODIFIER	downstream_gene_variant	.	protein_coding	-1
22509398	C	T	Prupe.2G182700	MODIFIER	intron_variant	.	protein_coding	1
22509473	C	T	Prupe.2G182600	MODIFIER	downstream_gene_variant	.	protein_coding	-1
22509473	C	T	Prupe.2G182700	MODIFIER	intron_variant	.	protein_coding	1
22509487	T	C	Prupe.2G182600	MODIFIER	downstream_gene_variant	.	protein_coding	-1
22509487	T	C	Prupe.2G182700	MODIFIER	intron_variant	.	protein_coding	1
22518291	C	T	Prupe.2G182900	MODIFIER	upstream_gene_variant	.	protein_coding	-1
22518291	C	T	Prupe.2G182800	MODIFIER	intron_variant	.	protein_coding	6
22518291	C	T	Prupe.2G182800	MODIFIER	intron_variant	.	protein_coding	5
22518291	C	T	Prupe.2G182800	MODIFIER	intron_variant	.	protein_coding	4
22518376	G	A	Prupe.2G182900	MODIFIER	upstream_gene_variant	.	protein_coding	-1
22518376	G	A	Prupe.2G182800	MODIFIER	intron_variant	.	protein_coding	6
22518376	G	A	Prupe.2G182800	MODIFIER	intron_variant	.	protein_coding	5
22518376	G	A	Prupe.2G182800	MODIFIER	intron_variant	.	protein_coding	4
22518520	A	T	Prupe.2G182900	MODIFIER	upstream_gene_variant	.	protein_coding	-1
22518520	A	T	Prupe.2G182800	MODIFIER	intron_variant	.	protein_coding	6
22518520	A	T	Prupe.2G182800	MODIFIER	intron_variant	.	protein_coding	5
22518520	A	T	Prupe.2G182800	MODIFIER	intron_variant	.	protein_coding	4
22519543	G	A	Prupe.2G182900	MODIFIER	upstream_gene_variant	.	protein_coding	-1
22519543	G	A	Prupe.2G182800	MODIFIER	intron_variant	.	protein_coding	10
22519543	G	A	Prupe.2G182800	MODIFIER	intron_variant	.	protein_coding	9
22519543	G	A	Prupe.2G182800	MODIFIER	intron_variant	.	protein_coding	8
22519574	T	C	Prupe.2G182900	MODIFIER	upstream_gene_variant	.	protein_coding	-1
22519574	T	C	Prupe.2G182800	MODIFIER	intron_variant	.	protein_coding	10
22519574	T	C	Prupe.2G182800	MODIFIER	intron_variant	.	protein_coding	9
22519574	T	C	Prupe.2G182800	MODIFIER	intron_variant	.	protein_coding	8
22555134	C	T	Prupe.2G183500	MODIFIER	upstream_gene_variant	.	protein_coding	-1
22555134	C	T	Prupe.2G183700	MODIFIER	upstream_gene_variant	.	protein_coding	-1
22555134	C	T	Prupe.2G183400	MODIFIER	downstream_gene_variant	.	protein_coding	-1
22555134	C	T	Prupe.2G183600	MODIFIER	downstream_gene_variant	.	protein_coding	-1
22555134	C	T	Prupe.2G183500-Prupe.2G183600	MODIFIER	intergenic_region	.	.	-1
22555164	C	G	Prupe.2G183500	MODIFIER	upstream_gene_variant	.	protein_coding	-1
22555164	C	G	Prupe.2G183700	MODIFIER	upstream_gene_variant	.	protein_coding	-1
22555164	C	G	Prupe.2G183400	MODIFIER	downstream_gene_variant	.	protein_coding	-1
22555164	C	G	Prupe.2G183600	MODIFIER	downstream_gene_variant	.	protein_coding	-1
22555164	C	G	Prupe.2G183500-Prupe.2G183600	MODIFIER	intergenic_region	.	.	-1
22555203	T	A	Prupe.2G183500	MODIFIER	upstream_gene_variant	.	protein_coding	-1
22555203	T	A	Prupe.2G183700	MODIFIER	upstream_gene_variant	.	protein_coding	-1
22555203	T	A	Prupe.2G183400	MODIFIER	downstream_gene_variant	.	protein_coding	-1
22555203	T	A	Prupe.2G183600	MODIFIER	downstream_gene_variant	.	protein_coding	-1
22555203	T	A	Prupe.2G183500-Prupe.2G183600	MODIFIER	intergenic_region	.	.	-1
22561085	A	C	Prupe.2G183700	LOW	synonymous_variant	p.Ile407Ile	protein_coding	2
22561085	A	C	Prupe.2G183700	LOW	synonymous_variant	p.Ile407Ile	protein_coding	3
22561085	A	C	Prupe.2G183800	MODIFIER	downstream_gene_variant	.	protein_coding	-1
22564187	C	A	Prupe.2G183700	MODIFIER	downstream_gene_variant	.	protein_coding	-1
22564187	C	A	Prupe.2G183800	MODIFIER	intron_variant	.	protein_coding	7
22564249	T	A	Prupe.2G183800	LOW	synonymous_variant	p.Val946Val	protein_coding	7
22564249	T	A	Prupe.2G183700	MODIFIER	downstream_gene_variant	.	protein_coding	-1
22564270	A	G	Prupe.2G183700	MODIFIER	downstream_gene_variant	.	protein_coding	-1
22564270	A	G	Prupe.2G183800	MODIFIER	intron_variant	.	protein_coding	6
22606117	A	T	Prupe.2G184400	LOW	synonymous_variant	p.Ser541Ser	protein_coding	2
22606117	A	T	Prupe.2G184500	MODIFIER	upstream_gene_variant	.	protein_coding	-1
22606229	A	G	Prupe.2G184400	MODERATE	missense_variant	p.Ser579Gly	protein_coding	2
22606229	A	G	Prupe.2G184500	MODIFIER	upstream_gene_variant	.	protein_coding	-1
22630347	T	C	Prupe.2G184900	LOW	synonymous_variant	p.Asn262Asn	protein_coding	4
22630347	T	C	Prupe.2G185000	MODIFIER	upstream_gene_variant	.	protein_coding	-1
22664220	G	A	Prupe.2G185500	LOW	synonymous_variant	p.Gly150Gly	protein_coding	1
22664220	G	A	Prupe.2G185400	MODIFIER	upstream_gene_variant	.	protein_coding	-1
22664220	G	A	Prupe.2G185600	MODIFIER	downstream_gene_variant	.	protein_coding	-1
22664297	G	A	Prupe.2G185500	LOW	synonymous_variant	p.Leu125Leu	protein_coding	1
22664297	G	A	Prupe.2G185400	MODIFIER	upstream_gene_variant	.	protein_coding	-1
22664297	G	A	Prupe.2G185600	MODIFIER	downstream_gene_variant	.	protein_coding	-1
22708244	A	C	Prupe.2G186100	MODIFIER	upstream_gene_variant	.	protein_coding	-1
22708244	A	C	Prupe.2G185900	MODIFIER	downstream_gene_variant	.	protein_coding	-1
22708244	A	C	Prupe.2G186000	MODIFIER	intron_variant	.	protein_coding	1
22708268	A	G	Prupe.2G186100	MODIFIER	upstream_gene_variant	.	protein_coding	-1
22708268	A	G	Prupe.2G185900	MODIFIER	downstream_gene_variant	.	protein_coding	-1
22708268	A	G	Prupe.2G186000	MODIFIER	intron_variant	.	protein_coding	1
22708273	T	G	Prupe.2G186100	MODIFIER	upstream_gene_variant	.	protein_coding	-1
22708273	T	G	Prupe.2G185900	MODIFIER	downstream_gene_variant	.	protein_coding	-1
22708273	T	G	Prupe.2G186000	MODIFIER	intron_variant	.	protein_coding	1
22708277	T	A	Prupe.2G186100	MODIFIER	upstream_gene_variant	.	protein_coding	-1
22708277	T	A	Prupe.2G185900	MODIFIER	downstream_gene_variant	.	protein_coding	-1
22708277	T	A	Prupe.2G186000	MODIFIER	intron_variant	.	protein_coding	1
22708280	G	C	Prupe.2G186100	MODIFIER	upstream_gene_variant	.	protein_coding	-1
22708280	G	C	Prupe.2G185900	MODIFIER	downstream_gene_variant	.	protein_coding	-1
22708280	G	C	Prupe.2G186000	MODIFIER	intron_variant	.	protein_coding	1
22708281	A	G	Prupe.2G186100	MODIFIER	upstream_gene_variant	.	protein_coding	-1
22708281	A	G	Prupe.2G185900	MODIFIER	downstream_gene_variant	.	protein_coding	-1
22708281	A	G	Prupe.2G186000	MODIFIER	intron_variant	.	protein_coding	1
22708283	T	G	Prupe.2G186100	MODIFIER	upstream_gene_variant	.	protein_coding	-1
22708283	T	G	Prupe.2G185900	MODIFIER	downstream_gene_variant	.	protein_coding	-1
22708283	T	G	Prupe.2G186000	MODIFIER	intron_variant	.	protein_coding	1
22708296	C	T	Prupe.2G186100	MODIFIER	upstream_gene_variant	.	protein_coding	-1
22708296	C	T	Prupe.2G185900	MODIFIER	downstream_gene_variant	.	protein_coding	-1
22708296	C	T	Prupe.2G186000	MODIFIER	intron_variant	.	protein_coding	1
22708301	C	A	Prupe.2G186100	MODIFIER	upstream_gene_variant	.	protein_coding	-1
22708301	C	A	Prupe.2G185900	MODIFIER	downstream_gene_variant	.	protein_coding	-1
22708301	C	A	Prupe.2G186000	MODIFIER	intron_variant	.	protein_coding	1
22708303	T	C	Prupe.2G186100	MODIFIER	upstream_gene_variant	.	protein_coding	-1
22708303	T	C	Prupe.2G185900	MODIFIER	downstream_gene_variant	.	protein_coding	-1
22708303	T	C	Prupe.2G186000	MODIFIER	intron_variant	.	protein_coding	1
22708322	T	G	Prupe.2G186100	MODIFIER	upstream_gene_variant	.	protein_coding	-1
22708322	T	G	Prupe.2G185900	MODIFIER	downstream_gene_variant	.	protein_coding	-1
22708322	T	G	Prupe.2G186000	MODIFIER	intron_variant	.	protein_coding	1
22708665	A	C	Prupe.2G186100	MODIFIER	upstream_gene_variant	.	protein_coding	-1
22708665	A	C	Prupe.2G185900	MODIFIER	downstream_gene_variant	.	protein_coding	-1
22708665	A	C	Prupe.2G186000	MODIFIER	intron_variant	.	protein_coding	1
22770794	C	T	Prupe.2G186700	LOW	synonymous_variant	p.Phe672Phe	protein_coding	9
22770794	C	T	Prupe.2G186700	LOW	synonymous_variant	p.Phe569Phe	protein_coding	9
22770794	C	T	Prupe.2G186700	LOW	synonymous_variant	p.Phe615Phe	protein_coding	10
22770794	C	T	Prupe.2G186800	MODIFIER	downstream_gene_variant	.	protein_coding	-1
22770876	T	C	Prupe.2G186700	LOW	synonymous_variant	p.Leu700Leu	protein_coding	9
22770876	T	C	Prupe.2G186700	LOW	synonymous_variant	p.Leu597Leu	protein_coding	9
22770876	T	C	Prupe.2G186700	LOW	synonymous_variant	p.Leu643Leu	protein_coding	10
22770876	T	C	Prupe.2G186800	MODIFIER	downstream_gene_variant	.	protein_coding	-1
22771054	G	A	Prupe.2G186700	MODERATE	missense_variant	p.Arg759His	protein_coding	9
22771054	G	A	Prupe.2G186700	MODERATE	missense_variant	p.Arg656His	protein_coding	9
22771054	G	A	Prupe.2G186700	MODERATE	missense_variant	p.Arg702His	protein_coding	10
22771054	G	A	Prupe.2G186800	MODIFIER	downstream_gene_variant	.	protein_coding	-1
22782668	A	T	Prupe.2G186900	MODIFIER	upstream_gene_variant	.	protein_coding	-1
22782668	A	T	Prupe.2G187000	MODIFIER	downstream_gene_variant	.	protein_coding	-1
22782668	A	T	Prupe.2G186900	MODIFIER	intron_variant	.	protein_coding	2
22787141	T	C	Prupe.2G187000	LOW	synonymous_variant	p.Lys416Lys	protein_coding	10
22787141	T	C	Prupe.2G186900	MODIFIER	3_prime_UTR_variant	.	protein_coding	9
22787141	T	C	Prupe.2G186900	MODIFIER	downstream_gene_variant	.	protein_coding	-1
22787282	A	C	Prupe.2G187000	LOW	synonymous_variant	p.Ala369Ala	protein_coding	10
22787282	A	C	Prupe.2G186900	MODIFIER	3_prime_UTR_variant	.	protein_coding	9
22787282	A	C	Prupe.2G186900	MODIFIER	downstream_gene_variant	.	protein_coding	-1
22787300	G	A	Prupe.2G187000	LOW	synonymous_variant	p.Ile363Ile	protein_coding	10
22787300	G	A	Prupe.2G186900	MODIFIER	3_prime_UTR_variant	.	protein_coding	9
22787300	G	A	Prupe.2G186900	MODIFIER	downstream_gene_variant	.	protein_coding	-1
22800243	T	A	Prupe.2G187300	MODERATE	missense_variant	p.Ile367Asn	protein_coding	2
22800243	T	A	Prupe.2G187200	MODIFIER	upstream_gene_variant	.	protein_coding	-1
22800243	T	A	Prupe.2G187400	MODIFIER	downstream_gene_variant	.	protein_coding	-1
22800243	T	A	Prupe.2G187500	MODIFIER	downstream_gene_variant	.	protein_coding	-1
22800283	G	A	Prupe.2G187300	LOW	synonymous_variant	p.Ser380Ser	protein_coding	2
22800283	G	A	Prupe.2G187200	MODIFIER	upstream_gene_variant	.	protein_coding	-1
22800283	G	A	Prupe.2G187400	MODIFIER	downstream_gene_variant	.	protein_coding	-1
22800283	G	A	Prupe.2G187500	MODIFIER	downstream_gene_variant	.	protein_coding	-1
22837803	C	A	Prupe.2G188000	MODERATE	missense_variant	p.Ser548Tyr	protein_coding	12
22855166	A	C	Prupe.2G188200	LOW	synonymous_variant	p.Gly195Gly	protein_coding	2
22855166	A	C	Prupe.2G188100	MODIFIER	downstream_gene_variant	.	protein_coding	-1
22855166	A	C	Prupe.2G188300	MODIFIER	downstream_gene_variant	.	protein_coding	-1
22855166	A	C	Prupe.2G188400	MODIFIER	downstream_gene_variant	.	protein_coding	-1
22855169	G	A	Prupe.2G188200	LOW	synonymous_variant	p.Ser194Ser	protein_coding	2
22855169	G	A	Prupe.2G188100	MODIFIER	downstream_gene_variant	.	protein_coding	-1
22855169	G	A	Prupe.2G188300	MODIFIER	downstream_gene_variant	.	protein_coding	-1
22855169	G	A	Prupe.2G188400	MODIFIER	downstream_gene_variant	.	protein_coding	-1
22855175	G	T	Prupe.2G188200	LOW	synonymous_variant	p.Val192Val	protein_coding	2
22855175	G	T	Prupe.2G188100	MODIFIER	downstream_gene_variant	.	protein_coding	-1
22855175	G	T	Prupe.2G188300	MODIFIER	downstream_gene_variant	.	protein_coding	-1
22855175	G	T	Prupe.2G188400	MODIFIER	downstream_gene_variant	.	protein_coding	-1
22855177	T	C	Prupe.2G188200	LOW	synonymous_variant	p.Val192Val	protein_coding	2
22855177	T	C	Prupe.2G188100	MODIFIER	downstream_gene_variant	.	protein_coding	-1
22855177	T	C	Prupe.2G188300	MODIFIER	downstream_gene_variant	.	protein_coding	-1
22855177	T	C	Prupe.2G188400	MODIFIER	downstream_gene_variant	.	protein_coding	-1
22857464	T	C	Prupe.2G188300	LOW	synonymous_variant	p.Ser90Ser	protein_coding	2
22857464	T	C	Prupe.2G188200	MODIFIER	upstream_gene_variant	.	protein_coding	-1
22857464	T	C	Prupe.2G188400	MODIFIER	downstream_gene_variant	.	protein_coding	-1
22857464	T	C	Prupe.2G188500	MODIFIER	downstream_gene_variant	.	protein_coding	-1
22863290	G	A	Prupe.2G188500	LOW	synonymous_variant	p.Thr487Thr	protein_coding	14
22863290	G	A	Prupe.2G188400	MODIFIER	upstream_gene_variant	.	protein_coding	-1
22903254	G	A	Prupe.2G189300	MODIFIER	3_prime_UTR_variant	.	protein_coding	2
22903254	G	A	Prupe.2G189200	MODIFIER	upstream_gene_variant	.	protein_coding	-1
22903254	G	A	Prupe.2G189400	MODIFIER	downstream_gene_variant	.	protein_coding	-1
22903303	A	G	Prupe.2G189300	MODIFIER	3_prime_UTR_variant	.	protein_coding	2
22903303	A	G	Prupe.2G189200	MODIFIER	upstream_gene_variant	.	protein_coding	-1
22903303	A	G	Prupe.2G189400	MODIFIER	downstream_gene_variant	.	protein_coding	-1
22903318	G	A	Prupe.2G189300	MODIFIER	3_prime_UTR_variant	.	protein_coding	2
22903318	G	A	Prupe.2G189200	MODIFIER	upstream_gene_variant	.	protein_coding	-1
22903318	G	A	Prupe.2G189400	MODIFIER	downstream_gene_variant	.	protein_coding	-1
22940481	G	A	Prupe.2G190100	LOW	synonymous_variant	p.Leu140Leu	protein_coding	2
22940481	G	A	Prupe.2G190100	LOW	synonymous_variant	p.Leu111Leu	protein_coding	2
22940481	G	A	Prupe.2G190000	MODIFIER	upstream_gene_variant	.	protein_coding	-1
22940844	A	T	Prupe.2G190100	MODIFIER	5_prime_UTR_variant	.	protein_coding	2
22940844	A	T	Prupe.2G190100	MODIFIER	intron_variant	.	protein_coding	1
22959157	C	A	Prupe.2G190300	MODIFIER	5_prime_UTR_variant	.	protein_coding	1
22959184	A	C	Prupe.2G190300	MODIFIER	5_prime_UTR_variant	.	protein_coding	1
22959223	A	G	Prupe.2G190300	LOW	synonymous_variant	p.Gln9Gln	protein_coding	1
23020552	G	T	Prupe.2G190800	MODERATE	missense_variant	p.Asp196Glu	protein_coding	2
23020552	G	T	Prupe.2G190800	MODERATE	missense_variant	p.Asp49Glu	protein_coding	2
23020552	G	T	Prupe.2G190800	MODERATE	missense_variant	p.Asp68Glu	protein_coding	2
23020552	G	T	Prupe.2G190900	MODIFIER	downstream_gene_variant	.	protein_coding	-1
23020985	A	G	Prupe.2G190900	MODIFIER	downstream_gene_variant	.	protein_coding	-1
23020985	A	G	Prupe.2G190800	MODIFIER	intron_variant	.	protein_coding	1
23021189	C	A	Prupe.2G190800	LOW	synonymous_variant	p.Ser126Ser	protein_coding	1
23021189	C	A	Prupe.2G190800	LOW	synonymous_variant	p.Val5Val	protein_coding	1
23021189	C	A	Prupe.2G190800	MODIFIER	5_prime_UTR_variant	.	protein_coding	1
23021189	C	A	Prupe.2G190800	MODIFIER	upstream_gene_variant	.	protein_coding	-1
23021189	C	A	Prupe.2G190900	MODIFIER	downstream_gene_variant	.	protein_coding	-1
23048402	T	C	Prupe.2G191000	MODIFIER	upstream_gene_variant	.	protein_coding	-1
23048402	T	C	Prupe.2G191100	MODIFIER	downstream_gene_variant	.	protein_coding	-1
23048402	T	C	Prupe.2G191200	MODIFIER	downstream_gene_variant	.	protein_coding	-1
23048402	T	C	Prupe.2G191000-Prupe.2G191100	MODIFIER	intergenic_region	.	.	-1
23051236	T	C	Prupe.2G191000	MODIFIER	upstream_gene_variant	.	protein_coding	-1
23051236	T	C	Prupe.2G191100	MODIFIER	upstream_gene_variant	.	protein_coding	-1
23051236	T	C	Prupe.2G191200	MODIFIER	downstream_gene_variant	.	protein_coding	-1
23051236	T	C	Prupe.2G191100-Prupe.2G191200	MODIFIER	intergenic_region	.	.	-1
23051319	G	A	Prupe.2G191100	MODIFIER	upstream_gene_variant	.	protein_coding	-1
23051319	G	A	Prupe.2G191200	MODIFIER	downstream_gene_variant	.	protein_coding	-1
23051319	G	A	Prupe.2G191100-Prupe.2G191200	MODIFIER	intergenic_region	.	.	-1
23051609	C	G	Prupe.2G191200	MODIFIER	3_prime_UTR_variant	.	protein_coding	3
23051609	C	G	Prupe.2G191100	MODIFIER	upstream_gene_variant	.	protein_coding	-1
23072090	G	T	Prupe.2G191400	MODIFIER	upstream_gene_variant	.	protein_coding	-1
23072090	G	T	Prupe.2G191300	MODIFIER	downstream_gene_variant	.	protein_coding	-1
23072090	G	T	Prupe.2G191300-Prupe.2G191400	MODIFIER	intergenic_region	.	.	-1
23072092	G	T	Prupe.2G191400	MODIFIER	upstream_gene_variant	.	protein_coding	-1
23072092	G	T	Prupe.2G191300	MODIFIER	downstream_gene_variant	.	protein_coding	-1
23072092	G	T	Prupe.2G191300-Prupe.2G191400	MODIFIER	intergenic_region	.	.	-1
23072135	G	A	Prupe.2G191400	MODIFIER	upstream_gene_variant	.	protein_coding	-1
23072135	G	A	Prupe.2G191300	MODIFIER	downstream_gene_variant	.	protein_coding	-1
23072135	G	A	Prupe.2G191300-Prupe.2G191400	MODIFIER	intergenic_region	.	.	-1
23080883	G	A	Prupe.2G191400	MODIFIER	downstream_gene_variant	.	protein_coding	-1
23080883	G	A	Prupe.2G191400-Prupe.2G191500	MODIFIER	intergenic_region	.	.	-1
23081267	A	G	Prupe.2G191400	MODIFIER	downstream_gene_variant	.	protein_coding	-1
23081267	A	G	Prupe.2G191400-Prupe.2G191500	MODIFIER	intergenic_region	.	.	-1
23081298	C	T	Prupe.2G191400	MODIFIER	downstream_gene_variant	.	protein_coding	-1
23081298	C	T	Prupe.2G191400-Prupe.2G191500	MODIFIER	intergenic_region	.	.	-1
23081307	C	T	Prupe.2G191400	MODIFIER	downstream_gene_variant	.	protein_coding	-1
23081307	C	T	Prupe.2G191400-Prupe.2G191500	MODIFIER	intergenic_region	.	.	-1
23081319	G	A	Prupe.2G191400	MODIFIER	downstream_gene_variant	.	protein_coding	-1
23081319	G	A	Prupe.2G191400-Prupe.2G191500	MODIFIER	intergenic_region	.	.	-1
23081325	G	C	Prupe.2G191400	MODIFIER	downstream_gene_variant	.	protein_coding	-1
23081325	G	C	Prupe.2G191400-Prupe.2G191500	MODIFIER	intergenic_region	.	.	-1
23081464	C	T	Prupe.2G191500	MODIFIER	upstream_gene_variant	.	protein_coding	-1
23081464	C	T	Prupe.2G191400	MODIFIER	downstream_gene_variant	.	protein_coding	-1
23081464	C	T	Prupe.2G191400-Prupe.2G191500	MODIFIER	intergenic_region	.	.	-1
23081489	A	C	Prupe.2G191500	MODIFIER	upstream_gene_variant	.	protein_coding	-1
23081489	A	C	Prupe.2G191400	MODIFIER	downstream_gene_variant	.	protein_coding	-1
23081489	A	C	Prupe.2G191400-Prupe.2G191500	MODIFIER	intergenic_region	.	.	-1
23122909	T	A	Prupe.2G191900	MODIFIER	3_prime_UTR_variant	.	protein_coding	6
23122909	T	A	Prupe.2G191800	MODIFIER	downstream_gene_variant	.	protein_coding	-1
23122909	T	A	Prupe.2G192000	MODIFIER	downstream_gene_variant	.	protein_coding	-1
23130506	T	G	Prupe.2G192100	MODERATE	missense_variant	p.Asn253His	protein_coding	2
23130506	T	G	Prupe.2G192000	MODIFIER	upstream_gene_variant	.	protein_coding	-1
23130873	A	T	Prupe.2G192100	LOW	synonymous_variant	p.Ser130Ser	protein_coding	2
23130873	A	T	Prupe.2G192000	MODIFIER	upstream_gene_variant	.	protein_coding	-1
23159888	A	G	Prupe.2G192600	LOW	synonymous_variant	p.Phe113Phe	protein_coding	4
23159888	A	G	Prupe.2G192600	LOW	synonymous_variant	p.Phe97Phe	protein_coding	2
23159888	A	G	Prupe.2G192600	LOW	synonymous_variant	p.Phe97Phe	protein_coding	3
23159888	A	G	Prupe.2G192500	MODIFIER	downstream_gene_variant	.	protein_coding	-1
23159888	A	G	Prupe.2G192700	MODIFIER	downstream_gene_variant	.	protein_coding	-1
23159921	A	G	Prupe.2G192600	LOW	synonymous_variant	p.Asp102Asp	protein_coding	4
23159921	A	G	Prupe.2G192600	LOW	synonymous_variant	p.Asp86Asp	protein_coding	2
23159921	A	G	Prupe.2G192600	LOW	synonymous_variant	p.Asp86Asp	protein_coding	3
23159921	A	G	Prupe.2G192500	MODIFIER	downstream_gene_variant	.	protein_coding	-1
23159921	A	G	Prupe.2G192700	MODIFIER	downstream_gene_variant	.	protein_coding	-1
23159933	C	G	Prupe.2G192600	LOW	synonymous_variant	p.Leu98Leu	protein_coding	4
23159933	C	G	Prupe.2G192600	LOW	synonymous_variant	p.Leu82Leu	protein_coding	2
23159933	C	G	Prupe.2G192600	LOW	synonymous_variant	p.Leu82Leu	protein_coding	3
23159933	C	G	Prupe.2G192500	MODIFIER	downstream_gene_variant	.	protein_coding	-1
23159933	C	G	Prupe.2G192700	MODIFIER	downstream_gene_variant	.	protein_coding	-1
23160298	T	A	Prupe.2G192500	MODIFIER	downstream_gene_variant	.	protein_coding	-1
23160298	T	A	Prupe.2G192700	MODIFIER	downstream_gene_variant	.	protein_coding	-1
23160298	T	A	Prupe.2G192600	MODIFIER	intron_variant	.	protein_coding	3
23160298	T	A	Prupe.2G192600	MODIFIER	intron_variant	.	protein_coding	1
23160298	T	A	Prupe.2G192600	MODIFIER	intron_variant	.	protein_coding	2
23160324	T	G	Prupe.2G192500	MODIFIER	downstream_gene_variant	.	protein_coding	-1
23160324	T	G	Prupe.2G192700	MODIFIER	downstream_gene_variant	.	protein_coding	-1
23160324	T	G	Prupe.2G192600	MODIFIER	intron_variant	.	protein_coding	3
23160324	T	G	Prupe.2G192600	MODIFIER	intron_variant	.	protein_coding	1
23160324	T	G	Prupe.2G192600	MODIFIER	intron_variant	.	protein_coding	2
23165080	T	C	Prupe.2G192700	MODERATE	missense_variant	p.Ser398Gly	protein_coding	5
23165080	T	C	Prupe.2G192700	MODERATE	missense_variant	p.Ser186Gly	protein_coding	5
23165080	T	C	Prupe.2G192700	MODERATE	missense_variant	p.Ser69Gly	protein_coding	3
23165080	T	C	Prupe.2G192600	MODIFIER	upstream_gene_variant	.	protein_coding	-1
23165080	T	C	Prupe.2G192800	MODIFIER	upstream_gene_variant	.	protein_coding	-1
23165091	A	G	Prupe.2G192700	MODERATE	missense_variant	p.Leu394Ser	protein_coding	5
23165091	A	G	Prupe.2G192700	MODERATE	missense_variant	p.Leu182Ser	protein_coding	5
23165091	A	G	Prupe.2G192700	MODERATE	missense_variant	p.Leu65Ser	protein_coding	3
23165091	A	G	Prupe.2G192600	MODIFIER	upstream_gene_variant	.	protein_coding	-1
23165091	A	G	Prupe.2G192800	MODIFIER	upstream_gene_variant	.	protein_coding	-1
23169860	T	C	Prupe.2G192700	MODIFIER	upstream_gene_variant	.	protein_coding	-1
23169860	T	C	Prupe.2G193000	MODIFIER	upstream_gene_variant	.	protein_coding	-1
23169860	T	C	Prupe.2G192900	MODIFIER	downstream_gene_variant	.	protein_coding	-1
23169860	T	C	Prupe.2G192800	MODIFIER	intron_variant	.	protein_coding	3
23169860	T	C	Prupe.2G192700	MODIFIER	intron_variant	.	protein_coding	1
23169875	T	C	Prupe.2G192700	MODIFIER	upstream_gene_variant	.	protein_coding	-1
23169875	T	C	Prupe.2G193000	MODIFIER	upstream_gene_variant	.	protein_coding	-1
23169875	T	C	Prupe.2G192900	MODIFIER	downstream_gene_variant	.	protein_coding	-1
23169875	T	C	Prupe.2G192800	MODIFIER	intron_variant	.	protein_coding	3
23169875	T	C	Prupe.2G192700	MODIFIER	intron_variant	.	protein_coding	1
23169899	C	A	Prupe.2G192700	MODIFIER	upstream_gene_variant	.	protein_coding	-1
23169899	C	A	Prupe.2G193000	MODIFIER	upstream_gene_variant	.	protein_coding	-1
23169899	C	A	Prupe.2G192900	MODIFIER	downstream_gene_variant	.	protein_coding	-1
23169899	C	A	Prupe.2G192800	MODIFIER	intron_variant	.	protein_coding	3
23169899	C	A	Prupe.2G192700	MODIFIER	intron_variant	.	protein_coding	1
23188431	A	T	Prupe.2G193400	MODIFIER	downstream_gene_variant	.	protein_coding	-1
23188431	A	T	Prupe.2G193300	MODIFIER	intron_variant	.	protein_coding	5
23188431	A	T	Prupe.2G193300	MODIFIER	intron_variant	.	protein_coding	6
23247899	G	A	Prupe.2G194200	LOW	synonymous_variant	p.Leu63Leu	protein_coding	1
23247998	C	G	Prupe.2G194200	MODERATE	missense_variant	p.Val30Leu	protein_coding	1
23295624	C	T	Prupe.2G195000	MODIFIER	upstream_gene_variant	.	protein_coding	-1
23295624	C	T	Prupe.2G195100	MODIFIER	upstream_gene_variant	.	protein_coding	-1
23295624	C	T	Prupe.2G195000-Prupe.2G195100	MODIFIER	intergenic_region	.	.	-1
23295636	G	A	Prupe.2G195000	MODIFIER	upstream_gene_variant	.	protein_coding	-1
23295636	G	A	Prupe.2G195100	MODIFIER	upstream_gene_variant	.	protein_coding	-1
23295636	G	A	Prupe.2G195000-Prupe.2G195100	MODIFIER	intergenic_region	.	.	-1
23295679	T	C	Prupe.2G195000	MODIFIER	upstream_gene_variant	.	protein_coding	-1
23295679	T	C	Prupe.2G195100	MODIFIER	upstream_gene_variant	.	protein_coding	-1
23295679	T	C	Prupe.2G195000-Prupe.2G195100	MODIFIER	intergenic_region	.	.	-1
23296025	G	C	Prupe.2G195000	MODIFIER	upstream_gene_variant	.	protein_coding	-1
23296025	G	C	Prupe.2G195100	MODIFIER	upstream_gene_variant	.	protein_coding	-1
23296025	G	C	Prupe.2G195000-Prupe.2G195100	MODIFIER	intergenic_region	.	.	-1
23302462	T	A	Prupe.2G195100	MODERATE	missense_variant	p.Phe388Tyr	protein_coding	5
23302462	T	A	Prupe.2G195200	MODIFIER	downstream_gene_variant	.	protein_coding	-1
23302479	T	A	Prupe.2G195100	MODERATE	missense_variant	p.Ser394Thr	protein_coding	5
23302479	T	A	Prupe.2G195200	MODIFIER	downstream_gene_variant	.	protein_coding	-1
23348985	C	G	Prupe.2G196000	LOW	synonymous_variant	p.Leu261Leu	protein_coding	1
23348985	C	G	Prupe.2G195900	MODIFIER	downstream_gene_variant	.	protein_coding	-1
23348991	T	C	Prupe.2G196000	LOW	synonymous_variant	p.Gly263Gly	protein_coding	1
23348991	T	C	Prupe.2G195900	MODIFIER	downstream_gene_variant	.	protein_coding	-1
23363155	G	C	Prupe.2G196200	MODERATE	missense_variant	p.Ala53Gly	protein_coding	1
23363155	G	C	Prupe.2G196200	MODERATE	missense_variant	p.Ala53Gly	protein_coding	2
23363155	G	C	Prupe.2G196100	MODIFIER	downstream_gene_variant	.	protein_coding	-1
23363155	G	C	Prupe.2G196300	MODIFIER	downstream_gene_variant	.	protein_coding	-1
23369010	C	A	Prupe.2G196200	MODIFIER	upstream_gene_variant	.	protein_coding	-1
23369010	C	A	Prupe.2G196400	MODIFIER	downstream_gene_variant	.	protein_coding	-1
23369010	C	A	Prupe.2G196300	MODIFIER	intron_variant	.	protein_coding	1
23406688	C	T	Prupe.2G196600	MODIFIER	upstream_gene_variant	.	protein_coding	-1
23406688	C	T	Prupe.2G196600-Prupe.2G196700	MODIFIER	intergenic_region	.	.	-1
23406700	G	A	Prupe.2G196600	MODIFIER	upstream_gene_variant	.	protein_coding	-1
23406700	G	A	Prupe.2G196600-Prupe.2G196700	MODIFIER	intergenic_region	.	.	-1
23406737	C	T	Prupe.2G196600	MODIFIER	upstream_gene_variant	.	protein_coding	-1
23406737	C	T	Prupe.2G196600-Prupe.2G196700	MODIFIER	intergenic_region	.	.	-1
23406743	C	T	Prupe.2G196600	MODIFIER	upstream_gene_variant	.	protein_coding	-1
23406743	C	T	Prupe.2G196600-Prupe.2G196700	MODIFIER	intergenic_region	.	.	-1
23406747	G	A	Prupe.2G196600	MODIFIER	upstream_gene_variant	.	protein_coding	-1
23406747	G	A	Prupe.2G196600-Prupe.2G196700	MODIFIER	intergenic_region	.	.	-1
23406748	A	G	Prupe.2G196600	MODIFIER	upstream_gene_variant	.	protein_coding	-1
23406748	A	G	Prupe.2G196600-Prupe.2G196700	MODIFIER	intergenic_region	.	.	-1
23406754	T	A	Prupe.2G196600	MODIFIER	upstream_gene_variant	.	protein_coding	-1
23406754	T	A	Prupe.2G196600-Prupe.2G196700	MODIFIER	intergenic_region	.	.	-1
23406770	A	G	Prupe.2G196600	MODIFIER	upstream_gene_variant	.	protein_coding	-1
23406770	A	G	Prupe.2G196600-Prupe.2G196700	MODIFIER	intergenic_region	.	.	-1
23406786	A	G	Prupe.2G196600	MODIFIER	upstream_gene_variant	.	protein_coding	-1
23406786	A	G	Prupe.2G196600-Prupe.2G196700	MODIFIER	intergenic_region	.	.	-1
23449325	T	C	Prupe.2G197400	LOW	5_prime_UTR_premature_start_codon_gain_variant	.	protein_coding	1
23449325	T	C	Prupe.2G197400	MODIFIER	5_prime_UTR_variant	.	protein_coding	1
23449325	T	C	Prupe.2G197500	MODIFIER	upstream_gene_variant	.	protein_coding	-1
23449325	T	C	Prupe.2G197300	MODIFIER	downstream_gene_variant	.	protein_coding	-1
23449325	T	C	Prupe.2G197400	MODIFIER	intron_variant	.	protein_coding	1
23452277	G	A	Prupe.2G197500	LOW	synonymous_variant	p.Leu529Leu	protein_coding	2
23452277	G	A	Prupe.2G197400	MODIFIER	upstream_gene_variant	.	protein_coding	-1
23460215	A	G	Prupe.2G197700	MODIFIER	upstream_gene_variant	.	protein_coding	-1
23460215	A	G	Prupe.2G197500	MODIFIER	downstream_gene_variant	.	protein_coding	-1
23460215	A	G	Prupe.2G197600	MODIFIER	downstream_gene_variant	.	protein_coding	-1
23460215	A	G	Prupe.2G197500-Prupe.2G197600	MODIFIER	intergenic_region	.	.	-1
23460334	C	T	Prupe.2G197700	MODIFIER	upstream_gene_variant	.	protein_coding	-1
23460334	C	T	Prupe.2G197500	MODIFIER	downstream_gene_variant	.	protein_coding	-1
23460334	C	T	Prupe.2G197600	MODIFIER	downstream_gene_variant	.	protein_coding	-1
23460334	C	T	Prupe.2G197500-Prupe.2G197600	MODIFIER	intergenic_region	.	.	-1
23624914	A	G	Prupe.2G198900	MODIFIER	3_prime_UTR_variant	.	protein_coding	2
23624914	A	G	Prupe.2G199000	MODIFIER	downstream_gene_variant	.	protein_coding	-1
23624914	A	G	Prupe.2G198900	MODIFIER	downstream_gene_variant	.	protein_coding	-1
23624926	G	C	Prupe.2G198900	MODIFIER	3_prime_UTR_variant	.	protein_coding	2
23624926	G	C	Prupe.2G199000	MODIFIER	downstream_gene_variant	.	protein_coding	-1
23624926	G	C	Prupe.2G198900	MODIFIER	downstream_gene_variant	.	protein_coding	-1
23624934	G	A	Prupe.2G198900	MODIFIER	3_prime_UTR_variant	.	protein_coding	2
23624934	G	A	Prupe.2G199000	MODIFIER	downstream_gene_variant	.	protein_coding	-1
23624934	G	A	Prupe.2G198900	MODIFIER	downstream_gene_variant	.	protein_coding	-1
23625025	A	C	Prupe.2G199000	MODERATE	missense_variant	p.Cys166Trp	protein_coding	4
23625025	A	C	Prupe.2G198900	MODIFIER	downstream_gene_variant	.	protein_coding	-1
23625100	T	C	Prupe.2G199000	LOW	synonymous_variant	p.Glu141Glu	protein_coding	4
23625100	T	C	Prupe.2G198900	MODIFIER	downstream_gene_variant	.	protein_coding	-1
23634518	C	T	Prupe.2G199100	LOW	synonymous_variant	p.Asn364Asn	protein_coding	4
23634518	C	T	Prupe.2G199100	MODIFIER	downstream_gene_variant	.	protein_coding	-1
23647217	T	C	Prupe.2G199200	MODIFIER	downstream_gene_variant	.	protein_coding	-1
23647217	T	C	Prupe.2G199300	MODIFIER	downstream_gene_variant	.	protein_coding	-1
23647217	T	C	Prupe.2G199200-Prupe.2G199300	MODIFIER	intergenic_region	.	.	-1
23647247	T	G	Prupe.2G199200	MODIFIER	downstream_gene_variant	.	protein_coding	-1
23647247	T	G	Prupe.2G199300	MODIFIER	downstream_gene_variant	.	protein_coding	-1
23647247	T	G	Prupe.2G199200-Prupe.2G199300	MODIFIER	intergenic_region	.	.	-1
23647265	A	G	Prupe.2G199200	MODIFIER	downstream_gene_variant	.	protein_coding	-1
23647265	A	G	Prupe.2G199300	MODIFIER	downstream_gene_variant	.	protein_coding	-1
23647265	A	G	Prupe.2G199200-Prupe.2G199300	MODIFIER	intergenic_region	.	.	-1
23647289	G	A	Prupe.2G199200	MODIFIER	downstream_gene_variant	.	protein_coding	-1
23647289	G	A	Prupe.2G199300	MODIFIER	downstream_gene_variant	.	protein_coding	-1
23647289	G	A	Prupe.2G199200-Prupe.2G199300	MODIFIER	intergenic_region	.	.	-1
23647373	C	T	Prupe.2G199200	MODIFIER	downstream_gene_variant	.	protein_coding	-1
23647373	C	T	Prupe.2G199300	MODIFIER	downstream_gene_variant	.	protein_coding	-1
23647373	C	T	Prupe.2G199200-Prupe.2G199300	MODIFIER	intergenic_region	.	.	-1
23647417	A	G	Prupe.2G199200	MODIFIER	downstream_gene_variant	.	protein_coding	-1
23647417	A	G	Prupe.2G199300	MODIFIER	downstream_gene_variant	.	protein_coding	-1
23647417	A	G	Prupe.2G199200-Prupe.2G199300	MODIFIER	intergenic_region	.	.	-1
23647424	C	G	Prupe.2G199200	MODIFIER	downstream_gene_variant	.	protein_coding	-1
23647424	C	G	Prupe.2G199300	MODIFIER	downstream_gene_variant	.	protein_coding	-1
23647424	C	G	Prupe.2G199200-Prupe.2G199300	MODIFIER	intergenic_region	.	.	-1
23647428	T	A	Prupe.2G199200	MODIFIER	downstream_gene_variant	.	protein_coding	-1
23647428	T	A	Prupe.2G199300	MODIFIER	downstream_gene_variant	.	protein_coding	-1
23647428	T	A	Prupe.2G199200-Prupe.2G199300	MODIFIER	intergenic_region	.	.	-1
23647442	C	T	Prupe.2G199200	MODIFIER	downstream_gene_variant	.	protein_coding	-1
23647442	C	T	Prupe.2G199300	MODIFIER	downstream_gene_variant	.	protein_coding	-1
23647442	C	T	Prupe.2G199200-Prupe.2G199300	MODIFIER	intergenic_region	.	.	-1
23717117	G	A	Prupe.2G200100	MODIFIER	3_prime_UTR_variant	.	protein_coding	2
23717117	G	A	Prupe.2G200100	MODIFIER	3_prime_UTR_variant	.	protein_coding	3
23717117	G	A	Prupe.2G199900	MODIFIER	upstream_gene_variant	.	protein_coding	-1
23717117	G	A	Prupe.2G200000	MODIFIER	downstream_gene_variant	.	protein_coding	-1
23717117	G	A	Prupe.2G200200	MODIFIER	downstream_gene_variant	.	protein_coding	-1
23741193	C	T	Prupe.2G200400	MODERATE	missense_variant	p.Pro423Ser	protein_coding	7
23741193	C	T	Prupe.2G200500	MODIFIER	downstream_gene_variant	.	protein_coding	-1
23741193	C	T	Prupe.2G200400	MODIFIER	intron_variant	.	protein_coding	1
23741359	G	C	Prupe.2G200400	MODERATE	missense_variant	p.Gly478Ala	protein_coding	7
23741359	G	C	Prupe.2G200500	MODIFIER	downstream_gene_variant	.	protein_coding	-1
23741359	G	C	Prupe.2G200400	MODIFIER	intron_variant	.	protein_coding	1
23752842	G	C	Prupe.2G200600	MODERATE	missense_variant	p.Asp322His	protein_coding	3
23752842	G	C	Prupe.2G200500	MODIFIER	upstream_gene_variant	.	protein_coding	-1
23752842	G	C	Prupe.2G200700	MODIFIER	upstream_gene_variant	.	protein_coding	-1
23763278	A	G	Prupe.2G200900	LOW	synonymous_variant	p.Val1785Val	protein_coding	18
23763278	A	G	Prupe.2G200800	MODIFIER	downstream_gene_variant	.	protein_coding	-1
23798725	A	G	Prupe.2G201300	MODIFIER	3_prime_UTR_variant	.	protein_coding	7
23798725	A	G	Prupe.2G201200	MODIFIER	upstream_gene_variant	.	protein_coding	-1
23798725	A	G	Prupe.2G201400	MODIFIER	downstream_gene_variant	.	protein_coding	-1
23798730	C	G	Prupe.2G201300	MODIFIER	3_prime_UTR_variant	.	protein_coding	7
23798730	C	G	Prupe.2G201200	MODIFIER	upstream_gene_variant	.	protein_coding	-1
23798730	C	G	Prupe.2G201400	MODIFIER	downstream_gene_variant	.	protein_coding	-1
23798744	T	G	Prupe.2G201300	MODIFIER	3_prime_UTR_variant	.	protein_coding	7
23798744	T	G	Prupe.2G201200	MODIFIER	upstream_gene_variant	.	protein_coding	-1
23798744	T	G	Prupe.2G201400	MODIFIER	downstream_gene_variant	.	protein_coding	-1
23798789	G	A	Prupe.2G201300	MODIFIER	3_prime_UTR_variant	.	protein_coding	7
23798789	G	A	Prupe.2G201200	MODIFIER	upstream_gene_variant	.	protein_coding	-1
23798789	G	A	Prupe.2G201400	MODIFIER	downstream_gene_variant	.	protein_coding	-1
23804326	C	A	Prupe.2G201400	MODIFIER	5_prime_UTR_variant	.	protein_coding	1
23804326	C	A	Prupe.2G201300	MODIFIER	upstream_gene_variant	.	protein_coding	-1
23804337	C	G	Prupe.2G201400	LOW	5_prime_UTR_premature_start_codon_gain_variant	.	protein_coding	1
23804337	C	G	Prupe.2G201400	MODIFIER	5_prime_UTR_variant	.	protein_coding	1
23804337	C	G	Prupe.2G201300	MODIFIER	upstream_gene_variant	.	protein_coding	-1
23804368	T	A	Prupe.2G201400	MODIFIER	5_prime_UTR_variant	.	protein_coding	1
23804368	T	A	Prupe.2G201300	MODIFIER	upstream_gene_variant	.	protein_coding	-1
23804369	T	A	Prupe.2G201400	MODIFIER	5_prime_UTR_variant	.	protein_coding	1
23804369	T	A	Prupe.2G201300	MODIFIER	upstream_gene_variant	.	protein_coding	-1
23804371	T	A	Prupe.2G201400	MODIFIER	5_prime_UTR_variant	.	protein_coding	1
23804371	T	A	Prupe.2G201300	MODIFIER	upstream_gene_variant	.	protein_coding	-1
23804372	T	A	Prupe.2G201400	MODIFIER	5_prime_UTR_variant	.	protein_coding	1
23804372	T	A	Prupe.2G201300	MODIFIER	upstream_gene_variant	.	protein_coding	-1
23804373	T	A	Prupe.2G201400	MODIFIER	5_prime_UTR_variant	.	protein_coding	1
23804373	T	A	Prupe.2G201300	MODIFIER	upstream_gene_variant	.	protein_coding	-1
23804374	T	A	Prupe.2G201400	MODIFIER	5_prime_UTR_variant	.	protein_coding	1
23804374	T	A	Prupe.2G201300	MODIFIER	upstream_gene_variant	.	protein_coding	-1
23804377	T	A	Prupe.2G201400	MODIFIER	5_prime_UTR_variant	.	protein_coding	1
23804377	T	A	Prupe.2G201300	MODIFIER	upstream_gene_variant	.	protein_coding	-1
23804378	T	A	Prupe.2G201400	MODIFIER	5_prime_UTR_variant	.	protein_coding	1
23804378	T	A	Prupe.2G201300	MODIFIER	upstream_gene_variant	.	protein_coding	-1
23820201	C	G	Prupe.2G201600	MODERATE	missense_variant	p.Met51Ile	protein_coding	1
23820201	C	G	Prupe.2G201500	MODIFIER	upstream_gene_variant	.	protein_coding	-1
23820201	C	G	Prupe.2G201600	MODIFIER	upstream_gene_variant	.	protein_coding	-1
23820201	C	G	Prupe.2G201700	MODIFIER	downstream_gene_variant	.	protein_coding	-1
23820201	C	G	Prupe.2G201800	MODIFIER	downstream_gene_variant	.	protein_coding	-1
23820201	C	G	Prupe.2G201600	MODIFIER	intron_variant	.	protein_coding	1
23820231	T	C	Prupe.2G201600	LOW	synonymous_variant	p.Ala41Ala	protein_coding	1
23820231	T	C	Prupe.2G201500	MODIFIER	upstream_gene_variant	.	protein_coding	-1
23820231	T	C	Prupe.2G201600	MODIFIER	upstream_gene_variant	.	protein_coding	-1
23820231	T	C	Prupe.2G201700	MODIFIER	downstream_gene_variant	.	protein_coding	-1
23820231	T	C	Prupe.2G201800	MODIFIER	downstream_gene_variant	.	protein_coding	-1
23820231	T	C	Prupe.2G201600	MODIFIER	intron_variant	.	protein_coding	1
23820269	T	C	Prupe.2G201600	MODERATE	missense_variant	p.Lys29Glu	protein_coding	1
23820269	T	C	Prupe.2G201500	MODIFIER	upstream_gene_variant	.	protein_coding	-1
23820269	T	C	Prupe.2G201600	MODIFIER	upstream_gene_variant	.	protein_coding	-1
23820269	T	C	Prupe.2G201700	MODIFIER	downstream_gene_variant	.	protein_coding	-1
23820269	T	C	Prupe.2G201800	MODIFIER	downstream_gene_variant	.	protein_coding	-1
23820269	T	C	Prupe.2G201600	MODIFIER	intron_variant	.	protein_coding	1
23823848	T	C	Prupe.2G201700	MODIFIER	5_prime_UTR_variant	.	protein_coding	1
23823848	T	C	Prupe.2G201600	MODIFIER	upstream_gene_variant	.	protein_coding	-1
23823848	T	C	Prupe.2G201800	MODIFIER	downstream_gene_variant	.	protein_coding	-1
23823848	T	C	Prupe.2G201900	MODIFIER	downstream_gene_variant	.	protein_coding	-1
23841783	G	A	Prupe.2G202000	MODIFIER	3_prime_UTR_variant	.	protein_coding	3
23852528	A	G	Prupe.2G202100	MODIFIER	upstream_gene_variant	.	protein_coding	-1
23852528	A	G	Prupe.2G202200	MODIFIER	upstream_gene_variant	.	protein_coding	-1
23852528	A	G	Prupe.2G202300	MODIFIER	intron_variant	.	protein_coding	3
23852556	T	C	Prupe.2G202100	MODIFIER	upstream_gene_variant	.	protein_coding	-1
23852556	T	C	Prupe.2G202200	MODIFIER	upstream_gene_variant	.	protein_coding	-1
23852556	T	C	Prupe.2G202300	MODIFIER	intron_variant	.	protein_coding	3
23852815	C	A	Prupe.2G202300	MODERATE	missense_variant	p.Ala2Ser	protein_coding	2
23852815	C	A	Prupe.2G202100	MODIFIER	upstream_gene_variant	.	protein_coding	-1
23852815	C	A	Prupe.2G202200	MODIFIER	upstream_gene_variant	.	protein_coding	-1
23856886	T	A	Prupe.2G202300	MODIFIER	upstream_gene_variant	.	protein_coding	-1
23856886	T	A	Prupe.2G202300-Prupe.2G202400	MODIFIER	intergenic_region	.	.	-1
23856895	G	A	Prupe.2G202300	MODIFIER	upstream_gene_variant	.	protein_coding	-1
23856895	G	A	Prupe.2G202300-Prupe.2G202400	MODIFIER	intergenic_region	.	.	-1
23857043	T	A	Prupe.2G202300	MODIFIER	upstream_gene_variant	.	protein_coding	-1
23857043	T	A	Prupe.2G202300-Prupe.2G202400	MODIFIER	intergenic_region	.	.	-1
23857065	C	T	Prupe.2G202300	MODIFIER	upstream_gene_variant	.	protein_coding	-1
23857065	C	T	Prupe.2G202300-Prupe.2G202400	MODIFIER	intergenic_region	.	.	-1
23857073	G	T	Prupe.2G202300	MODIFIER	upstream_gene_variant	.	protein_coding	-1
23857073	G	T	Prupe.2G202300-Prupe.2G202400	MODIFIER	intergenic_region	.	.	-1
23857113	G	A	Prupe.2G202300	MODIFIER	upstream_gene_variant	.	protein_coding	-1
23857113	G	A	Prupe.2G202300-Prupe.2G202400	MODIFIER	intergenic_region	.	.	-1
23857123	A	G	Prupe.2G202300	MODIFIER	upstream_gene_variant	.	protein_coding	-1
23857123	A	G	Prupe.2G202300-Prupe.2G202400	MODIFIER	intergenic_region	.	.	-1
23857126	C	T	Prupe.2G202300	MODIFIER	upstream_gene_variant	.	protein_coding	-1
23857126	C	T	Prupe.2G202300-Prupe.2G202400	MODIFIER	intergenic_region	.	.	-1
23857132	C	T	Prupe.2G202300	MODIFIER	upstream_gene_variant	.	protein_coding	-1
23857132	C	T	Prupe.2G202300-Prupe.2G202400	MODIFIER	intergenic_region	.	.	-1
23868958	T	G	Prupe.2G202400	MODIFIER	upstream_gene_variant	.	protein_coding	-1
23868958	T	G	Prupe.2G202500	MODIFIER	intron_variant	.	protein_coding	6
23868958	T	G	Prupe.2G202500	MODIFIER	intron_variant	.	protein_coding	2
23868964	T	C	Prupe.2G202400	MODIFIER	upstream_gene_variant	.	protein_coding	-1
23868964	T	C	Prupe.2G202500	MODIFIER	intron_variant	.	protein_coding	6
23868964	T	C	Prupe.2G202500	MODIFIER	intron_variant	.	protein_coding	2
23868967	T	A	Prupe.2G202400	MODIFIER	upstream_gene_variant	.	protein_coding	-1
23868967	T	A	Prupe.2G202500	MODIFIER	intron_variant	.	protein_coding	6
23868967	T	A	Prupe.2G202500	MODIFIER	intron_variant	.	protein_coding	2
23868983	A	G	Prupe.2G202400	MODIFIER	upstream_gene_variant	.	protein_coding	-1
23868983	A	G	Prupe.2G202500	MODIFIER	intron_variant	.	protein_coding	6
23868983	A	G	Prupe.2G202500	MODIFIER	intron_variant	.	protein_coding	2
23869020	C	T	Prupe.2G202500	LOW	synonymous_variant	p.Thr386Thr	protein_coding	6
23869020	C	T	Prupe.2G202500	LOW	synonymous_variant	p.Thr383Thr	protein_coding	6
23869020	C	T	Prupe.2G202500	LOW	synonymous_variant	p.Thr385Thr	protein_coding	6
23869020	C	T	Prupe.2G202500	LOW	synonymous_variant	p.Thr384Thr	protein_coding	6
23869020	C	T	Prupe.2G202500	MODIFIER	3_prime_UTR_variant	.	protein_coding	2
23869020	C	T	Prupe.2G202400	MODIFIER	upstream_gene_variant	.	protein_coding	-1
23869057	G	A	Prupe.2G202500	MODERATE	missense_variant	p.Ala374Val	protein_coding	6
23869057	G	A	Prupe.2G202500	MODERATE	missense_variant	p.Ala371Val	protein_coding	6
23869057	G	A	Prupe.2G202500	MODERATE	missense_variant	p.Ala373Val	protein_coding	6
23869057	G	A	Prupe.2G202500	MODERATE	missense_variant	p.Ala372Val	protein_coding	6
23869057	G	A	Prupe.2G202500	MODIFIER	3_prime_UTR_variant	.	protein_coding	2
23869057	G	A	Prupe.2G202400	MODIFIER	upstream_gene_variant	.	protein_coding	-1
23869133	T	C	Prupe.2G202500	MODERATE	missense_variant	p.Thr349Ala	protein_coding	6
23869133	T	C	Prupe.2G202500	MODERATE	missense_variant	p.Thr346Ala	protein_coding	6
23869133	T	C	Prupe.2G202500	MODERATE	missense_variant	p.Thr348Ala	protein_coding	6
23869133	T	C	Prupe.2G202500	MODERATE	missense_variant	p.Thr347Ala	protein_coding	6
23869133	T	C	Prupe.2G202500	MODIFIER	3_prime_UTR_variant	.	protein_coding	2
23869133	T	C	Prupe.2G202400	MODIFIER	upstream_gene_variant	.	protein_coding	-1
23895631	G	A	Prupe.2G202900	MODERATE	missense_variant	p.Ala444Val	protein_coding	7
23895631	G	A	Prupe.2G202800	MODIFIER	upstream_gene_variant	.	protein_coding	-1
23895631	G	A	Prupe.2G203000	MODIFIER	downstream_gene_variant	.	protein_coding	-1
23895632	C	T	Prupe.2G202900	MODERATE	missense_variant	p.Ala444Thr	protein_coding	7
23895632	C	T	Prupe.2G202800	MODIFIER	upstream_gene_variant	.	protein_coding	-1
23895632	C	T	Prupe.2G203000	MODIFIER	downstream_gene_variant	.	protein_coding	-1
23895663	C	T	Prupe.2G202900	LOW	synonymous_variant	p.Pro433Pro	protein_coding	7
23895663	C	T	Prupe.2G202800	MODIFIER	upstream_gene_variant	.	protein_coding	-1
23895663	C	T	Prupe.2G203000	MODIFIER	downstream_gene_variant	.	protein_coding	-1
23918017	T	A	Prupe.2G203400	LOW	synonymous_variant	p.Val255Val	protein_coding	8
23918017	T	A	Prupe.2G203300	MODIFIER	downstream_gene_variant	.	protein_coding	-1
23918017	T	A	Prupe.2G203500	MODIFIER	downstream_gene_variant	.	protein_coding	-1
23918077	A	G	Prupe.2G203400	LOW	splice_region_variant&intron_variant	.	protein_coding	7
23918077	A	G	Prupe.2G203300	MODIFIER	downstream_gene_variant	.	protein_coding	-1
23918077	A	G	Prupe.2G203500	MODIFIER	downstream_gene_variant	.	protein_coding	-1
23932373	T	A	Prupe.2G203600	MODERATE	missense_variant	p.Asp744Glu	protein_coding	1
23932373	T	A	Prupe.2G203700	MODIFIER	downstream_gene_variant	.	protein_coding	-1
23932750	A	G	Prupe.2G203600	MODIFIER	downstream_gene_variant	.	protein_coding	-1
23932750	A	G	Prupe.2G203700	MODIFIER	downstream_gene_variant	.	protein_coding	-1
23932750	A	G	Prupe.2G203600-Prupe.2G203700	MODIFIER	intergenic_region	.	.	-1
23932841	T	C	Prupe.2G203600	MODIFIER	downstream_gene_variant	.	protein_coding	-1
23932841	T	C	Prupe.2G203700	MODIFIER	downstream_gene_variant	.	protein_coding	-1
23932841	T	C	Prupe.2G203600-Prupe.2G203700	MODIFIER	intergenic_region	.	.	-1
23934535	A	G	Prupe.2G203700	LOW	splice_region_variant&intron_variant	.	protein_coding	2
23934535	A	G	Prupe.2G203600	MODIFIER	downstream_gene_variant	.	protein_coding	-1
23934780	C	T	Prupe.2G203700	MODERATE	missense_variant	p.Gly213Ser	protein_coding	2
23934780	C	T	Prupe.2G203600	MODIFIER	downstream_gene_variant	.	protein_coding	-1
23957977	C	G	Prupe.2G204100	MODERATE	missense_variant	p.Ala196Gly	protein_coding	4
23957977	C	G	Prupe.2G204000	MODIFIER	downstream_gene_variant	.	protein_coding	-1
23957977	C	G	Prupe.2G204200	MODIFIER	downstream_gene_variant	.	protein_coding	-1
23957977	C	G	Prupe.2G204300	MODIFIER	downstream_gene_variant	.	protein_coding	-1
23957977	C	G	Prupe.2G204100	MODIFIER	intron_variant	.	protein_coding	3
23957977	C	G	Prupe.2G204100	MODIFIER	intron_variant	.	protein_coding	2
23957992	G	C	Prupe.2G204100	MODERATE	missense_variant	p.Arg201Pro	protein_coding	4
23957992	G	C	Prupe.2G204000	MODIFIER	downstream_gene_variant	.	protein_coding	-1
23957992	G	C	Prupe.2G204200	MODIFIER	downstream_gene_variant	.	protein_coding	-1
23957992	G	C	Prupe.2G204300	MODIFIER	downstream_gene_variant	.	protein_coding	-1
23957992	G	C	Prupe.2G204100	MODIFIER	intron_variant	.	protein_coding	3
23957992	G	C	Prupe.2G204100	MODIFIER	intron_variant	.	protein_coding	2
23958017	G	A	Prupe.2G204100	LOW	synonymous_variant	p.Arg209Arg	protein_coding	4
23958017	G	A	Prupe.2G204000	MODIFIER	downstream_gene_variant	.	protein_coding	-1
23958017	G	A	Prupe.2G204200	MODIFIER	downstream_gene_variant	.	protein_coding	-1
23958017	G	A	Prupe.2G204300	MODIFIER	downstream_gene_variant	.	protein_coding	-1
23958017	G	A	Prupe.2G204100	MODIFIER	intron_variant	.	protein_coding	3
23958017	G	A	Prupe.2G204100	MODIFIER	intron_variant	.	protein_coding	2
24007734	T	C	Prupe.2G205500	LOW	synonymous_variant	p.Thr374Thr	protein_coding	6
24007734	T	C	Prupe.2G205400	MODIFIER	upstream_gene_variant	.	protein_coding	-1
24007734	T	C	Prupe.2G205600	MODIFIER	upstream_gene_variant	.	protein_coding	-1
24037970	T	A	Prupe.2G205900	LOW	synonymous_variant	p.Ala145Ala	protein_coding	2
24037970	T	A	Prupe.2G205800	MODIFIER	upstream_gene_variant	.	protein_coding	-1
24037970	T	A	Prupe.2G206000	MODIFIER	downstream_gene_variant	.	protein_coding	-1
24043937	T	C	Prupe.2G206000	MODIFIER	upstream_gene_variant	.	protein_coding	-1
24043937	T	C	Prupe.2G206000	MODIFIER	intron_variant	.	protein_coding	1
24044173	T	C	Prupe.2G206000	MODIFIER	upstream_gene_variant	.	protein_coding	-1
24044173	T	C	Prupe.2G206000	MODIFIER	intron_variant	.	protein_coding	1
24044200	T	A	Prupe.2G206000	MODIFIER	upstream_gene_variant	.	protein_coding	-1
24044200	T	A	Prupe.2G206000	MODIFIER	intron_variant	.	protein_coding	1
24054322	C	T	Prupe.2G206200	MODIFIER	downstream_gene_variant	.	protein_coding	-1
24054322	C	T	Prupe.2G206100	MODIFIER	intron_variant	.	protein_coding	2
24054322	C	T	Prupe.2G206100	MODIFIER	intron_variant	.	protein_coding	1
24054331	C	T	Prupe.2G206200	MODIFIER	downstream_gene_variant	.	protein_coding	-1
24054331	C	T	Prupe.2G206100	MODIFIER	intron_variant	.	protein_coding	2
24054331	C	T	Prupe.2G206100	MODIFIER	intron_variant	.	protein_coding	1
24054338	A	G	Prupe.2G206200	MODIFIER	downstream_gene_variant	.	protein_coding	-1
24054338	A	G	Prupe.2G206100	MODIFIER	intron_variant	.	protein_coding	2
24054338	A	G	Prupe.2G206100	MODIFIER	intron_variant	.	protein_coding	1
24054354	T	G	Prupe.2G206200	MODIFIER	downstream_gene_variant	.	protein_coding	-1
24054354	T	G	Prupe.2G206100	MODIFIER	intron_variant	.	protein_coding	2
24054354	T	G	Prupe.2G206100	MODIFIER	intron_variant	.	protein_coding	1
24054470	A	C	Prupe.2G206200	MODIFIER	downstream_gene_variant	.	protein_coding	-1
24054470	A	C	Prupe.2G206100	MODIFIER	intron_variant	.	protein_coding	2
24054470	A	C	Prupe.2G206100	MODIFIER	intron_variant	.	protein_coding	1
24054511	T	A	Prupe.2G206200	MODIFIER	downstream_gene_variant	.	protein_coding	-1
24054511	T	A	Prupe.2G206100	MODIFIER	intron_variant	.	protein_coding	2
24054511	T	A	Prupe.2G206100	MODIFIER	intron_variant	.	protein_coding	1
24058348	T	C	Prupe.2G206200	MODERATE	missense_variant	p.Met371Val	protein_coding	2
24058348	T	C	Prupe.2G206100	MODIFIER	downstream_gene_variant	.	protein_coding	-1
24058348	T	C	Prupe.2G206300	MODIFIER	downstream_gene_variant	.	protein_coding	-1
24106159	G	A	Prupe.2G207100	MODERATE	missense_variant	p.Val371Met	protein_coding	4
24106159	G	A	Prupe.2G207000	MODIFIER	upstream_gene_variant	.	protein_coding	-1
24106159	G	A	Prupe.2G207200	MODIFIER	upstream_gene_variant	.	protein_coding	-1
24125978	G	T	Prupe.2G207300	MODERATE	missense_variant	p.Glu296Asp	protein_coding	7
24125978	G	T	Prupe.2G207300	MODERATE	missense_variant	p.Glu277Asp	protein_coding	6
24125978	G	T	Prupe.2G207300	MODERATE	missense_variant	p.Glu235Asp	protein_coding	6
24125978	G	T	Prupe.2G207400	MODIFIER	upstream_gene_variant	.	protein_coding	-1
24125978	G	T	Prupe.2G207500	MODIFIER	upstream_gene_variant	.	protein_coding	-1
24125978	G	T	Prupe.2G207300	MODIFIER	intron_variant	.	protein_coding	3
24126054	C	T	Prupe.2G207300	MODERATE	missense_variant	p.Leu322Phe	protein_coding	7
24126054	C	T	Prupe.2G207300	MODERATE	missense_variant	p.Leu303Phe	protein_coding	6
24126054	C	T	Prupe.2G207300	MODERATE	missense_variant	p.Leu261Phe	protein_coding	6
24126054	C	T	Prupe.2G207400	MODIFIER	upstream_gene_variant	.	protein_coding	-1
24126054	C	T	Prupe.2G207500	MODIFIER	upstream_gene_variant	.	protein_coding	-1
24126054	C	T	Prupe.2G207300	MODIFIER	intron_variant	.	protein_coding	3
24215648	C	A	Prupe.2G209000	LOW	synonymous_variant	p.Pro28Pro	protein_coding	1
24215648	C	A	Prupe.2G208900	MODIFIER	upstream_gene_variant	.	protein_coding	-1
24215648	C	A	Prupe.2G209100	MODIFIER	upstream_gene_variant	.	protein_coding	-1
24228618	G	T	Prupe.2G209300	MODERATE	missense_variant	p.Ser625Tyr	protein_coding	4
24228618	G	T	Prupe.2G209200	MODIFIER	upstream_gene_variant	.	protein_coding	-1
24228618	G	T	Prupe.2G209100	MODIFIER	downstream_gene_variant	.	protein_coding	-1
24228626	A	G	Prupe.2G209300	LOW	synonymous_variant	p.Val622Val	protein_coding	4
24228626	A	G	Prupe.2G209200	MODIFIER	upstream_gene_variant	.	protein_coding	-1
24228626	A	G	Prupe.2G209100	MODIFIER	downstream_gene_variant	.	protein_coding	-1
24228773	C	T	Prupe.2G209300	LOW	synonymous_variant	p.Val573Val	protein_coding	4
24228773	C	T	Prupe.2G209200	MODIFIER	upstream_gene_variant	.	protein_coding	-1
24228773	C	T	Prupe.2G209100	MODIFIER	downstream_gene_variant	.	protein_coding	-1
24282552	C	A	Prupe.2G210000	MODIFIER	upstream_gene_variant	.	protein_coding	-1
24282552	C	A	Prupe.2G210100	MODIFIER	upstream_gene_variant	.	protein_coding	-1
24282552	C	A	Prupe.2G209900	MODIFIER	intron_variant	.	protein_coding	6
24282552	C	A	Prupe.2G209900	MODIFIER	intron_variant	.	protein_coding	5
24282613	G	T	Prupe.2G209900	LOW	synonymous_variant	p.Val321Val	protein_coding	7
24282613	G	T	Prupe.2G209900	LOW	synonymous_variant	p.Val321Val	protein_coding	6
24282613	G	T	Prupe.2G210000	MODIFIER	upstream_gene_variant	.	protein_coding	-1
24282613	G	T	Prupe.2G210100	MODIFIER	upstream_gene_variant	.	protein_coding	-1
24282849	T	A	Prupe.2G210000	MODIFIER	upstream_gene_variant	.	protein_coding	-1
24282849	T	A	Prupe.2G210100	MODIFIER	upstream_gene_variant	.	protein_coding	-1
24282849	T	A	Prupe.2G209900	MODIFIER	intron_variant	.	protein_coding	7
24282849	T	A	Prupe.2G209900	MODIFIER	intron_variant	.	protein_coding	6
24282861	G	A	Prupe.2G210000	MODIFIER	upstream_gene_variant	.	protein_coding	-1
24282861	G	A	Prupe.2G210100	MODIFIER	upstream_gene_variant	.	protein_coding	-1
24282861	G	A	Prupe.2G209900	MODIFIER	intron_variant	.	protein_coding	7
24282861	G	A	Prupe.2G209900	MODIFIER	intron_variant	.	protein_coding	6
24282933	G	A	Prupe.2G210000	MODIFIER	upstream_gene_variant	.	protein_coding	-1
24282933	G	A	Prupe.2G210100	MODIFIER	upstream_gene_variant	.	protein_coding	-1
24282933	G	A	Prupe.2G209900	MODIFIER	intron_variant	.	protein_coding	7
24282933	G	A	Prupe.2G209900	MODIFIER	intron_variant	.	protein_coding	6
24288259	C	T	Prupe.2G210100	LOW	synonymous_variant	p.Trp140Trp	protein_coding	3
24288259	C	T	Prupe.2G210200	MODIFIER	upstream_gene_variant	.	protein_coding	-1
24288259	C	T	Prupe.2G209900	MODIFIER	downstream_gene_variant	.	protein_coding	-1
24288259	C	T	Prupe.2G210000	MODIFIER	downstream_gene_variant	.	protein_coding	-1
24288259	C	T	Prupe.2G210100	MODIFIER	intron_variant	.	protein_coding	1
24288314	A	G	Prupe.2G210100	MODERATE	missense_variant	p.Glu158Gly	protein_coding	3
24288314	A	G	Prupe.2G210200	MODIFIER	upstream_gene_variant	.	protein_coding	-1
24288314	A	G	Prupe.2G209900	MODIFIER	downstream_gene_variant	.	protein_coding	-1
24288314	A	G	Prupe.2G210000	MODIFIER	downstream_gene_variant	.	protein_coding	-1
24288314	A	G	Prupe.2G210100	MODIFIER	intron_variant	.	protein_coding	1
24288715	T	G	Prupe.2G210200	MODIFIER	upstream_gene_variant	.	protein_coding	-1
24288715	T	G	Prupe.2G209900	MODIFIER	downstream_gene_variant	.	protein_coding	-1
24288715	T	G	Prupe.2G210100	MODIFIER	downstream_gene_variant	.	protein_coding	-1
24288715	T	G	Prupe.2G210100	MODIFIER	intron_variant	.	protein_coding	1
24293641	C	T	Prupe.2G210100	MODIFIER	downstream_gene_variant	.	protein_coding	-1
24293641	C	T	Prupe.2G210200	MODIFIER	intron_variant	.	protein_coding	3
24293666	T	C	Prupe.2G210100	MODIFIER	downstream_gene_variant	.	protein_coding	-1
24293666	T	C	Prupe.2G210200	MODIFIER	intron_variant	.	protein_coding	3
24293701	T	G	Prupe.2G210100	MODIFIER	downstream_gene_variant	.	protein_coding	-1
24293701	T	G	Prupe.2G210200	MODIFIER	intron_variant	.	protein_coding	3
24293728	T	A	Prupe.2G210100	MODIFIER	downstream_gene_variant	.	protein_coding	-1
24293728	T	A	Prupe.2G210200	MODIFIER	intron_variant	.	protein_coding	3
24324518	T	C	Prupe.2G210500	LOW	synonymous_variant	p.Lys83Lys	protein_coding	2
24324518	T	C	Prupe.2G210500	LOW	synonymous_variant	p.Lys83Lys	protein_coding	1
24324518	T	C	Prupe.2G210400	MODIFIER	upstream_gene_variant	.	protein_coding	-1
24324518	T	C	Prupe.2G210600	MODIFIER	upstream_gene_variant	.	protein_coding	-1
24338861	C	T	Prupe.2G210700	LOW	synonymous_variant	p.Val330Val	protein_coding	3
24338861	C	T	Prupe.2G210600	MODIFIER	downstream_gene_variant	.	protein_coding	-1
24339017	T	G	Prupe.2G210700	MODERATE	missense_variant	p.Asp382Glu	protein_coding	3
24339017	T	G	Prupe.2G210600	MODIFIER	downstream_gene_variant	.	protein_coding	-1
24339032	T	C	Prupe.2G210700	LOW	synonymous_variant	p.Gly387Gly	protein_coding	3
24339032	T	C	Prupe.2G210600	MODIFIER	downstream_gene_variant	.	protein_coding	-1
24339049	A	C	Prupe.2G210700	MODERATE	missense_variant	p.Lys393Thr	protein_coding	3
24339049	A	C	Prupe.2G210600	MODIFIER	downstream_gene_variant	.	protein_coding	-1
24339200	C	T	Prupe.2G210700	LOW	synonymous_variant	p.Gly443Gly	protein_coding	3
24339200	C	T	Prupe.2G210600	MODIFIER	downstream_gene_variant	.	protein_coding	-1
24377785	T	C	Prupe.2G211400	MODERATE	missense_variant	p.Gln1287Arg	protein_coding	7
24377785	T	C	Prupe.2G211400	MODERATE	missense_variant	p.Gln1270Arg	protein_coding	7
24377785	T	C	Prupe.2G211300	MODIFIER	downstream_gene_variant	.	protein_coding	-1
24377813	T	C	Prupe.2G211400	MODERATE	missense_variant	p.Ser1278Gly	protein_coding	7
24377813	T	C	Prupe.2G211400	MODERATE	missense_variant	p.Ser1261Gly	protein_coding	7
24377813	T	C	Prupe.2G211300	MODIFIER	downstream_gene_variant	.	protein_coding	-1
24377823	A	C	Prupe.2G211400	MODERATE	missense_variant	p.Asp1274Glu	protein_coding	7
24377823	A	C	Prupe.2G211400	MODERATE	missense_variant	p.Asp1257Glu	protein_coding	7
24377823	A	C	Prupe.2G211300	MODIFIER	downstream_gene_variant	.	protein_coding	-1
24377829	A	G	Prupe.2G211400	LOW	synonymous_variant	p.Ala1272Ala	protein_coding	7
24377829	A	G	Prupe.2G211400	LOW	synonymous_variant	p.Ala1255Ala	protein_coding	7
24377829	A	G	Prupe.2G211300	MODIFIER	downstream_gene_variant	.	protein_coding	-1
24397732	G	A	Prupe.2G211800	LOW	5_prime_UTR_premature_start_codon_gain_variant	.	protein_coding	1
24397732	G	A	Prupe.2G211800	MODIFIER	5_prime_UTR_variant	.	protein_coding	1
24397732	G	A	Prupe.2G211800	MODIFIER	upstream_gene_variant	.	protein_coding	-1
24397747	G	A	Prupe.2G211800	LOW	5_prime_UTR_premature_start_codon_gain_variant	.	protein_coding	1
24397747	G	A	Prupe.2G211800	MODIFIER	5_prime_UTR_variant	.	protein_coding	1
24397747	G	A	Prupe.2G211800	MODIFIER	upstream_gene_variant	.	protein_coding	-1
24408845	C	T	Prupe.2G211900	LOW	synonymous_variant	p.Pro241Pro	protein_coding	8
24408845	C	T	Prupe.2G212000	MODIFIER	upstream_gene_variant	.	protein_coding	-1
24408886	T	C	Prupe.2G211900	LOW	splice_region_variant&intron_variant	.	protein_coding	8
24408886	T	C	Prupe.2G212000	MODIFIER	upstream_gene_variant	.	protein_coding	-1
24408922	G	T	Prupe.2G212000	MODIFIER	upstream_gene_variant	.	protein_coding	-1
24408922	G	T	Prupe.2G211900	MODIFIER	intron_variant	.	protein_coding	8
24414318	C	T	Prupe.2G212000	LOW	synonymous_variant	p.Leu156Leu	protein_coding	6
24414318	C	T	Prupe.2G212000	LOW	synonymous_variant	p.Leu76Leu	protein_coding	3
24414318	C	T	Prupe.2G211900	MODIFIER	downstream_gene_variant	.	protein_coding	-1
24414360	A	G	Prupe.2G212000	LOW	splice_region_variant&intron_variant	.	protein_coding	6
24414360	A	G	Prupe.2G212000	LOW	splice_region_variant&intron_variant	.	protein_coding	3
24414360	A	G	Prupe.2G211900	MODIFIER	downstream_gene_variant	.	protein_coding	-1
24414390	A	C	Prupe.2G211900	MODIFIER	downstream_gene_variant	.	protein_coding	-1
24414390	A	C	Prupe.2G212000	MODIFIER	intron_variant	.	protein_coding	6
24414390	A	C	Prupe.2G212000	MODIFIER	intron_variant	.	protein_coding	3
24414585	T	G	Prupe.2G211900	MODIFIER	downstream_gene_variant	.	protein_coding	-1
24414585	T	G	Prupe.2G212000	MODIFIER	intron_variant	.	protein_coding	7
24414585	T	G	Prupe.2G212000	MODIFIER	intron_variant	.	protein_coding	4
24414589	T	A	Prupe.2G211900	MODIFIER	downstream_gene_variant	.	protein_coding	-1
24414589	T	A	Prupe.2G212000	MODIFIER	intron_variant	.	protein_coding	7
24414589	T	A	Prupe.2G212000	MODIFIER	intron_variant	.	protein_coding	4
24414605	T	C	Prupe.2G211900	MODIFIER	downstream_gene_variant	.	protein_coding	-1
24414605	T	C	Prupe.2G212000	MODIFIER	intron_variant	.	protein_coding	7
24414605	T	C	Prupe.2G212000	MODIFIER	intron_variant	.	protein_coding	4
24427630	T	C	Prupe.2G212200	MODIFIER	downstream_gene_variant	.	protein_coding	-1
24427630	T	C	Prupe.2G212300	MODIFIER	downstream_gene_variant	.	protein_coding	-1
24427630	T	C	Prupe.2G212400	MODIFIER	downstream_gene_variant	.	protein_coding	-1
24427630	T	C	Prupe.2G212100-Prupe.2G212200	MODIFIER	intergenic_region	.	.	-1
24427670	G	A	Prupe.2G212200	MODIFIER	3_prime_UTR_variant	.	protein_coding	2
24427670	G	A	Prupe.2G212300	MODIFIER	downstream_gene_variant	.	protein_coding	-1
24427670	G	A	Prupe.2G212400	MODIFIER	downstream_gene_variant	.	protein_coding	-1
24427671	C	G	Prupe.2G212200	MODIFIER	3_prime_UTR_variant	.	protein_coding	2
24427671	C	G	Prupe.2G212300	MODIFIER	downstream_gene_variant	.	protein_coding	-1
24427671	C	G	Prupe.2G212400	MODIFIER	downstream_gene_variant	.	protein_coding	-1
24427680	T	C	Prupe.2G212200	MODIFIER	3_prime_UTR_variant	.	protein_coding	2
24427680	T	C	Prupe.2G212300	MODIFIER	downstream_gene_variant	.	protein_coding	-1
24427680	T	C	Prupe.2G212400	MODIFIER	downstream_gene_variant	.	protein_coding	-1
24430823	G	T	Prupe.2G212200	MODIFIER	upstream_gene_variant	.	protein_coding	-1
24430823	G	T	Prupe.2G212400	MODIFIER	downstream_gene_variant	.	protein_coding	-1
24430823	G	T	Prupe.2G212500	MODIFIER	downstream_gene_variant	.	protein_coding	-1
24430823	G	T	Prupe.2G212300	MODIFIER	intron_variant	.	protein_coding	1
24430852	C	G	Prupe.2G212200	MODIFIER	upstream_gene_variant	.	protein_coding	-1
24430852	C	G	Prupe.2G212400	MODIFIER	downstream_gene_variant	.	protein_coding	-1
24430852	C	G	Prupe.2G212500	MODIFIER	downstream_gene_variant	.	protein_coding	-1
24430852	C	G	Prupe.2G212300	MODIFIER	intron_variant	.	protein_coding	1
24431060	G	A	Prupe.2G212300	MODIFIER	5_prime_UTR_variant	.	protein_coding	1
24431060	G	A	Prupe.2G212200	MODIFIER	upstream_gene_variant	.	protein_coding	-1
24431060	G	A	Prupe.2G212400	MODIFIER	downstream_gene_variant	.	protein_coding	-1
24431060	G	A	Prupe.2G212500	MODIFIER	downstream_gene_variant	.	protein_coding	-1
24431086	G	T	Prupe.2G212300	MODIFIER	5_prime_UTR_variant	.	protein_coding	1
24431086	G	T	Prupe.2G212200	MODIFIER	upstream_gene_variant	.	protein_coding	-1
24431086	G	T	Prupe.2G212400	MODIFIER	downstream_gene_variant	.	protein_coding	-1
24431086	G	T	Prupe.2G212500	MODIFIER	downstream_gene_variant	.	protein_coding	-1
24453096	A	G	Prupe.2G212800	MODIFIER	intron_variant	.	protein_coding	11
24453096	A	G	Prupe.2G212800	MODIFIER	intron_variant	.	protein_coding	7
24453098	T	C	Prupe.2G212800	MODIFIER	intron_variant	.	protein_coding	11
24453098	T	C	Prupe.2G212800	MODIFIER	intron_variant	.	protein_coding	7
24453487	C	G	Prupe.2G212800	MODERATE	missense_variant	p.Arg380Gly	protein_coding	13
24453487	C	G	Prupe.2G212800	MODERATE	missense_variant	p.Arg373Gly	protein_coding	13
24453487	C	G	Prupe.2G212800	MODERATE	missense_variant	p.Arg218Gly	protein_coding	9
24496143	T	C	Prupe.2G213100	MODIFIER	downstream_gene_variant	.	protein_coding	-1
24496143	T	C	Prupe.2G213300	MODIFIER	downstream_gene_variant	.	protein_coding	-1
24496143	T	C	Prupe.2G213200	MODIFIER	intron_variant	.	protein_coding	2
24496400	C	T	Prupe.2G213100	MODIFIER	downstream_gene_variant	.	protein_coding	-1
24496400	C	T	Prupe.2G213300	MODIFIER	downstream_gene_variant	.	protein_coding	-1
24496400	C	T	Prupe.2G213200	MODIFIER	intron_variant	.	protein_coding	2
24509759	A	G	Prupe.2G213500	LOW	synonymous_variant	p.Leu21Leu	protein_coding	2
24509759	A	G	Prupe.2G213500	LOW	synonymous_variant	p.Leu21Leu	protein_coding	3
24509759	A	G	Prupe.2G213300	MODIFIER	upstream_gene_variant	.	protein_coding	-1
24509759	A	G	Prupe.2G213400	MODIFIER	downstream_gene_variant	.	protein_coding	-1
24532226	G	C	Prupe.2G214000	MODERATE	missense_variant	p.Val800Leu	protein_coding	1
24532226	G	C	Prupe.2G214100	MODIFIER	upstream_gene_variant	.	protein_coding	-1
24532226	G	C	Prupe.2G213800	MODIFIER	downstream_gene_variant	.	protein_coding	-1
24532226	G	C	Prupe.2G213900	MODIFIER	downstream_gene_variant	.	protein_coding	-1
24532226	G	C	Prupe.2G214200	MODIFIER	downstream_gene_variant	.	protein_coding	-1
24532263	C	G	Prupe.2G214000	MODERATE	missense_variant	p.Thr812Ser	protein_coding	1
24532263	C	G	Prupe.2G214100	MODIFIER	upstream_gene_variant	.	protein_coding	-1
24532263	C	G	Prupe.2G213800	MODIFIER	downstream_gene_variant	.	protein_coding	-1
24532263	C	G	Prupe.2G213900	MODIFIER	downstream_gene_variant	.	protein_coding	-1
24532263	C	G	Prupe.2G214200	MODIFIER	downstream_gene_variant	.	protein_coding	-1
24558752	T	C	Prupe.2G214500	MODIFIER	downstream_gene_variant	.	protein_coding	-1
24558752	T	C	Prupe.2G214400	MODIFIER	intron_variant	.	protein_coding	6
24558752	T	C	Prupe.2G214400	MODIFIER	intron_variant	.	protein_coding	1
24558754	C	T	Prupe.2G214500	MODIFIER	downstream_gene_variant	.	protein_coding	-1
24558754	C	T	Prupe.2G214400	MODIFIER	intron_variant	.	protein_coding	6
24558754	C	T	Prupe.2G214400	MODIFIER	intron_variant	.	protein_coding	1
24569705	A	T	Prupe.2G214500	MODIFIER	upstream_gene_variant	.	protein_coding	-1
24569705	A	T	Prupe.2G214500-Prupe.2G214600	MODIFIER	intergenic_region	.	.	-1
24569721	T	C	Prupe.2G214500	MODIFIER	upstream_gene_variant	.	protein_coding	-1
24569721	T	C	Prupe.2G214500-Prupe.2G214600	MODIFIER	intergenic_region	.	.	-1
24579409	T	A	Prupe.2G214600	MODIFIER	downstream_gene_variant	.	protein_coding	-1
24579409	T	A	Prupe.2G214700	MODIFIER	intron_variant	.	protein_coding	1
24600262	A	G	Prupe.2G215100	MODIFIER	upstream_gene_variant	.	protein_coding	-1
24600262	A	G	Prupe.2G215200	MODIFIER	downstream_gene_variant	.	protein_coding	-1
24600262	A	G	Prupe.2G215000	MODIFIER	intron_variant	.	protein_coding	1
24600607	C	T	Prupe.2G215100	LOW	5_prime_UTR_premature_start_codon_gain_variant	.	protein_coding	1
24600607	C	T	Prupe.2G215100	MODIFIER	5_prime_UTR_variant	.	protein_coding	1
24600607	C	T	Prupe.2G215200	MODIFIER	downstream_gene_variant	.	protein_coding	-1
24600607	C	T	Prupe.2G215000	MODIFIER	intron_variant	.	protein_coding	1
24600618	A	T	Prupe.2G215100	LOW	splice_region_variant&intron_variant	.	protein_coding	1
24600618	A	T	Prupe.2G215200	MODIFIER	downstream_gene_variant	.	protein_coding	-1
24600618	A	T	Prupe.2G215000	MODIFIER	intron_variant	.	protein_coding	1
24600644	C	T	Prupe.2G215200	MODIFIER	downstream_gene_variant	.	protein_coding	-1
24600644	C	T	Prupe.2G215000	MODIFIER	intron_variant	.	protein_coding	1
24600644	C	T	Prupe.2G215100	MODIFIER	intron_variant	.	protein_coding	1
24600648	G	A	Prupe.2G215200	MODIFIER	downstream_gene_variant	.	protein_coding	-1
24600648	G	A	Prupe.2G215000	MODIFIER	intron_variant	.	protein_coding	1
24600648	G	A	Prupe.2G215100	MODIFIER	intron_variant	.	protein_coding	1
24600745	G	A	Prupe.2G215200	MODIFIER	downstream_gene_variant	.	protein_coding	-1
24600745	G	A	Prupe.2G215000	MODIFIER	intron_variant	.	protein_coding	1
24600745	G	A	Prupe.2G215100	MODIFIER	intron_variant	.	protein_coding	1
24600769	G	A	Prupe.2G215200	MODIFIER	downstream_gene_variant	.	protein_coding	-1
24600769	G	A	Prupe.2G215000	MODIFIER	intron_variant	.	protein_coding	1
24600769	G	A	Prupe.2G215100	MODIFIER	intron_variant	.	protein_coding	1
24600809	A	G	Prupe.2G215100	MODIFIER	3_prime_UTR_variant	.	protein_coding	2
24600809	A	G	Prupe.2G215200	MODIFIER	downstream_gene_variant	.	protein_coding	-1
24600809	A	G	Prupe.2G215000	MODIFIER	intron_variant	.	protein_coding	1
24600918	T	A	Prupe.2G215100	MODIFIER	3_prime_UTR_variant	.	protein_coding	2
24600918	T	A	Prupe.2G215200	MODIFIER	downstream_gene_variant	.	protein_coding	-1
24600918	T	A	Prupe.2G215000	MODIFIER	intron_variant	.	protein_coding	1
24600939	T	A	Prupe.2G215100	MODIFIER	3_prime_UTR_variant	.	protein_coding	2
24600939	T	A	Prupe.2G215200	MODIFIER	downstream_gene_variant	.	protein_coding	-1
24600939	T	A	Prupe.2G215000	MODIFIER	intron_variant	.	protein_coding	1
24600975	A	G	Prupe.2G215100	MODIFIER	3_prime_UTR_variant	.	protein_coding	2
24600975	A	G	Prupe.2G215200	MODIFIER	downstream_gene_variant	.	protein_coding	-1
24600975	A	G	Prupe.2G215000	MODIFIER	intron_variant	.	protein_coding	1
24600986	C	G	Prupe.2G215100	MODIFIER	3_prime_UTR_variant	.	protein_coding	2
24600986	C	G	Prupe.2G215200	MODIFIER	downstream_gene_variant	.	protein_coding	-1
24600986	C	G	Prupe.2G215000	MODIFIER	intron_variant	.	protein_coding	1
24601016	A	C	Prupe.2G215100	MODIFIER	downstream_gene_variant	.	protein_coding	-1
24601016	A	C	Prupe.2G215200	MODIFIER	downstream_gene_variant	.	protein_coding	-1
24601016	A	C	Prupe.2G215000	MODIFIER	intron_variant	.	protein_coding	1
24604300	A	G	Prupe.2G215200	LOW	synonymous_variant	p.Pro340Pro	protein_coding	11
24604300	A	G	Prupe.2G215000	MODIFIER	upstream_gene_variant	.	protein_coding	-1
24604300	A	G	Prupe.2G215100	MODIFIER	downstream_gene_variant	.	protein_coding	-1
24604306	G	A	Prupe.2G215200	LOW	synonymous_variant	p.Gly338Gly	protein_coding	11
24604306	G	A	Prupe.2G215000	MODIFIER	upstream_gene_variant	.	protein_coding	-1
24604306	G	A	Prupe.2G215100	MODIFIER	downstream_gene_variant	.	protein_coding	-1
24604315	G	C	Prupe.2G215200	LOW	synonymous_variant	p.Val335Val	protein_coding	11
24604315	G	C	Prupe.2G215000	MODIFIER	upstream_gene_variant	.	protein_coding	-1
24604315	G	C	Prupe.2G215100	MODIFIER	downstream_gene_variant	.	protein_coding	-1
24641558	C	G	Prupe.2G215600	LOW	synonymous_variant	p.Val1314Val	protein_coding	4
24641558	C	G	Prupe.2G215600	LOW	synonymous_variant	p.Val1313Val	protein_coding	4
24641558	C	G	Prupe.2G215700	MODIFIER	downstream_gene_variant	.	protein_coding	-1
24641563	C	A	Prupe.2G215600	MODERATE	missense_variant	p.Pro1316Gln	protein_coding	4
24641563	C	A	Prupe.2G215600	MODERATE	missense_variant	p.Pro1315Gln	protein_coding	4
24641563	C	A	Prupe.2G215700	MODIFIER	downstream_gene_variant	.	protein_coding	-1
24641588	A	G	Prupe.2G215600	LOW	synonymous_variant	p.Glu1324Glu	protein_coding	4
24641588	A	G	Prupe.2G215600	LOW	synonymous_variant	p.Glu1323Glu	protein_coding	4
24641588	A	G	Prupe.2G215700	MODIFIER	downstream_gene_variant	.	protein_coding	-1
24641596	T	C	Prupe.2G215600	MODERATE	missense_variant	p.Phe1327Ser	protein_coding	4
24641596	T	C	Prupe.2G215600	MODERATE	missense_variant	p.Phe1326Ser	protein_coding	4
24641596	T	C	Prupe.2G215700	MODIFIER	downstream_gene_variant	.	protein_coding	-1
24641608	T	G	Prupe.2G215600	MODERATE	missense_variant	p.Ile1331Ser	protein_coding	4
24641608	T	G	Prupe.2G215600	MODERATE	missense_variant	p.Ile1330Ser	protein_coding	4
24641608	T	G	Prupe.2G215700	MODIFIER	downstream_gene_variant	.	protein_coding	-1
24642140	G	A	Prupe.2G215600	LOW	synonymous_variant	p.Gly1508Gly	protein_coding	4
24642140	G	A	Prupe.2G215600	LOW	synonymous_variant	p.Gly1507Gly	protein_coding	4
24642140	G	A	Prupe.2G215700	MODIFIER	downstream_gene_variant	.	protein_coding	-1
24642195	G	C	Prupe.2G215600	MODERATE	missense_variant	p.Val1527Leu	protein_coding	4
24642195	G	C	Prupe.2G215600	MODERATE	missense_variant	p.Val1526Leu	protein_coding	4
24642195	G	C	Prupe.2G215700	MODIFIER	downstream_gene_variant	.	protein_coding	-1
24642242	G	A	Prupe.2G215600	LOW	synonymous_variant	p.Gly1542Gly	protein_coding	4
24642242	G	A	Prupe.2G215600	LOW	synonymous_variant	p.Gly1541Gly	protein_coding	4
24642242	G	A	Prupe.2G215700	MODIFIER	downstream_gene_variant	.	protein_coding	-1
24684206	G	C	Prupe.2G216400	MODIFIER	downstream_gene_variant	.	protein_coding	-1
24684206	G	C	Prupe.2G216400	MODIFIER	intron_variant	.	protein_coding	9
24684237	G	T	Prupe.2G216400	MODIFIER	downstream_gene_variant	.	protein_coding	-1
24684237	G	T	Prupe.2G216400	MODIFIER	intron_variant	.	protein_coding	9
24684246	A	C	Prupe.2G216400	MODIFIER	downstream_gene_variant	.	protein_coding	-1
24684246	A	C	Prupe.2G216400	MODIFIER	intron_variant	.	protein_coding	9
24684491	C	T	Prupe.2G216400	MODIFIER	downstream_gene_variant	.	protein_coding	-1
24684491	C	T	Prupe.2G216400	MODIFIER	intron_variant	.	protein_coding	9
24684492	C	T	Prupe.2G216400	MODIFIER	downstream_gene_variant	.	protein_coding	-1
24684492	C	T	Prupe.2G216400	MODIFIER	intron_variant	.	protein_coding	9
24718742	G	C	Prupe.2G216900	MODIFIER	5_prime_UTR_variant	.	protein_coding	1
24718742	G	C	Prupe.2G216800	MODIFIER	upstream_gene_variant	.	protein_coding	-1
24718742	G	C	Prupe.2G217000	MODIFIER	downstream_gene_variant	.	protein_coding	-1
24718890	G	A	Prupe.2G216900	MODIFIER	5_prime_UTR_variant	.	protein_coding	1
24718890	G	A	Prupe.2G216800	MODIFIER	upstream_gene_variant	.	protein_coding	-1
24718890	G	A	Prupe.2G217000	MODIFIER	downstream_gene_variant	.	protein_coding	-1
24730881	G	T	Prupe.2G217300	LOW	synonymous_variant	p.Ala437Ala	protein_coding	3
24730881	G	T	Prupe.2G217200	MODIFIER	downstream_gene_variant	.	protein_coding	-1
24749467	C	T	Prupe.2G217500	MODIFIER	upstream_gene_variant	.	protein_coding	-1
24749467	C	T	Prupe.2G217600	MODIFIER	intron_variant	.	protein_coding	1
24749467	C	T	Prupe.2G217600	MODIFIER	intron_variant	.	protein_coding	2
24749476	C	T	Prupe.2G217500	MODIFIER	upstream_gene_variant	.	protein_coding	-1
24749476	C	T	Prupe.2G217600	MODIFIER	intron_variant	.	protein_coding	1
24749476	C	T	Prupe.2G217600	MODIFIER	intron_variant	.	protein_coding	2
24762481	G	A	Prupe.2G217900	MODIFIER	downstream_gene_variant	.	protein_coding	-1
24762481	G	A	Prupe.2G217800	MODIFIER	intron_variant	.	protein_coding	6
24763880	T	C	Prupe.2G217800	MODIFIER	3_prime_UTR_variant	.	protein_coding	7
24763880	T	C	Prupe.2G217900	MODIFIER	downstream_gene_variant	.	protein_coding	-1
24763911	C	T	Prupe.2G217800	MODIFIER	3_prime_UTR_variant	.	protein_coding	7
24763911	C	T	Prupe.2G217900	MODIFIER	downstream_gene_variant	.	protein_coding	-1
24764228	A	G	Prupe.2G217900	MODIFIER	3_prime_UTR_variant	.	protein_coding	2
24764228	A	G	Prupe.2G217800	MODIFIER	downstream_gene_variant	.	protein_coding	-1
24764228	A	G	Prupe.2G218000	MODIFIER	downstream_gene_variant	.	protein_coding	-1
24764255	T	G	Prupe.2G217900	MODIFIER	3_prime_UTR_variant	.	protein_coding	2
24764255	T	G	Prupe.2G217800	MODIFIER	downstream_gene_variant	.	protein_coding	-1
24764255	T	G	Prupe.2G218000	MODIFIER	downstream_gene_variant	.	protein_coding	-1
24764297	C	T	Prupe.2G217900	MODIFIER	3_prime_UTR_variant	.	protein_coding	2
24764297	C	T	Prupe.2G217800	MODIFIER	downstream_gene_variant	.	protein_coding	-1
24764297	C	T	Prupe.2G218000	MODIFIER	downstream_gene_variant	.	protein_coding	-1
24764336	C	T	Prupe.2G217900	MODIFIER	3_prime_UTR_variant	.	protein_coding	2
24764336	C	T	Prupe.2G217800	MODIFIER	downstream_gene_variant	.	protein_coding	-1
24764336	C	T	Prupe.2G218000	MODIFIER	downstream_gene_variant	.	protein_coding	-1
24764355	T	C	Prupe.2G217900	MODIFIER	3_prime_UTR_variant	.	protein_coding	2
24764355	T	C	Prupe.2G217800	MODIFIER	downstream_gene_variant	.	protein_coding	-1
24764355	T	C	Prupe.2G218000	MODIFIER	downstream_gene_variant	.	protein_coding	-1
24764356	T	A	Prupe.2G217900	MODIFIER	3_prime_UTR_variant	.	protein_coding	2
24764356	T	A	Prupe.2G217800	MODIFIER	downstream_gene_variant	.	protein_coding	-1
24764356	T	A	Prupe.2G218000	MODIFIER	downstream_gene_variant	.	protein_coding	-1
24764397	T	A	Prupe.2G217900	MODIFIER	3_prime_UTR_variant	.	protein_coding	2
24764397	T	A	Prupe.2G217800	MODIFIER	downstream_gene_variant	.	protein_coding	-1
24764397	T	A	Prupe.2G218000	MODIFIER	downstream_gene_variant	.	protein_coding	-1
24764403	C	T	Prupe.2G217900	MODIFIER	3_prime_UTR_variant	.	protein_coding	2
24764403	C	T	Prupe.2G217800	MODIFIER	downstream_gene_variant	.	protein_coding	-1
24764403	C	T	Prupe.2G218000	MODIFIER	downstream_gene_variant	.	protein_coding	-1
24764408	G	C	Prupe.2G217900	MODIFIER	3_prime_UTR_variant	.	protein_coding	2
24764408	G	C	Prupe.2G217800	MODIFIER	downstream_gene_variant	.	protein_coding	-1
24764408	G	C	Prupe.2G218000	MODIFIER	downstream_gene_variant	.	protein_coding	-1
24764714	G	A	Prupe.2G217800	MODIFIER	downstream_gene_variant	.	protein_coding	-1
24764714	G	A	Prupe.2G218000	MODIFIER	downstream_gene_variant	.	protein_coding	-1
24764714	G	A	Prupe.2G217900	MODIFIER	intron_variant	.	protein_coding	1
24787995	T	G	Prupe.2G218400	MODIFIER	upstream_gene_variant	.	protein_coding	-1
24787995	T	G	Prupe.2G218200	MODIFIER	downstream_gene_variant	.	protein_coding	-1
24787995	T	G	Prupe.2G218500	MODIFIER	downstream_gene_variant	.	protein_coding	-1
24787995	T	G	Prupe.2G218300	MODIFIER	intron_variant	.	protein_coding	1
24793053	T	A	Prupe.2G218500	HIGH	stop_gained	p.Lys27*	protein_coding	1
24793053	T	A	Prupe.2G218300	MODIFIER	upstream_gene_variant	.	protein_coding	-1
24793053	T	A	Prupe.2G218600	MODIFIER	upstream_gene_variant	.	protein_coding	-1
24793053	T	A	Prupe.2G218400	MODIFIER	downstream_gene_variant	.	protein_coding	-1
24793137	G	C	Prupe.2G218300	MODIFIER	upstream_gene_variant	.	protein_coding	-1
24793137	G	C	Prupe.2G218500	MODIFIER	upstream_gene_variant	.	protein_coding	-1
24793137	G	C	Prupe.2G218600	MODIFIER	upstream_gene_variant	.	protein_coding	-1
24793137	G	C	Prupe.2G218400	MODIFIER	downstream_gene_variant	.	protein_coding	-1
24793137	G	C	Prupe.2G218500-Prupe.2G218600	MODIFIER	intergenic_region	.	.	-1
24793149	T	A	Prupe.2G218300	MODIFIER	upstream_gene_variant	.	protein_coding	-1
24793149	T	A	Prupe.2G218500	MODIFIER	upstream_gene_variant	.	protein_coding	-1
24793149	T	A	Prupe.2G218600	MODIFIER	upstream_gene_variant	.	protein_coding	-1
24793149	T	A	Prupe.2G218400	MODIFIER	downstream_gene_variant	.	protein_coding	-1
24793149	T	A	Prupe.2G218500-Prupe.2G218600	MODIFIER	intergenic_region	.	.	-1
24793201	A	T	Prupe.2G218300	MODIFIER	upstream_gene_variant	.	protein_coding	-1
24793201	A	T	Prupe.2G218500	MODIFIER	upstream_gene_variant	.	protein_coding	-1
24793201	A	T	Prupe.2G218600	MODIFIER	upstream_gene_variant	.	protein_coding	-1
24793201	A	T	Prupe.2G218400	MODIFIER	downstream_gene_variant	.	protein_coding	-1
24793201	A	T	Prupe.2G218500-Prupe.2G218600	MODIFIER	intergenic_region	.	.	-1
24793399	A	C	Prupe.2G218500	MODIFIER	upstream_gene_variant	.	protein_coding	-1
24793399	A	C	Prupe.2G218600	MODIFIER	upstream_gene_variant	.	protein_coding	-1
24793399	A	C	Prupe.2G218700	MODIFIER	upstream_gene_variant	.	protein_coding	-1
24793399	A	C	Prupe.2G218400	MODIFIER	downstream_gene_variant	.	protein_coding	-1
24793399	A	C	Prupe.2G218500-Prupe.2G218600	MODIFIER	intergenic_region	.	.	-1
24811014	G	A	Prupe.2G219100	MODERATE	missense_variant	p.Pro274Ser	protein_coding	7
24811014	G	A	Prupe.2G219100	MODERATE	missense_variant	p.Pro268Ser	protein_coding	7
24811014	G	A	Prupe.2G219200	MODIFIER	downstream_gene_variant	.	protein_coding	-1
24811172	T	A	Prupe.2G219200	MODIFIER	downstream_gene_variant	.	protein_coding	-1
24811172	T	A	Prupe.2G219100	MODIFIER	intron_variant	.	protein_coding	6
24811190	A	G	Prupe.2G219200	MODIFIER	downstream_gene_variant	.	protein_coding	-1
24811190	A	G	Prupe.2G219100	MODIFIER	intron_variant	.	protein_coding	6
24811209	T	C	Prupe.2G219100	LOW	splice_region_variant&intron_variant	.	protein_coding	6
24811209	T	C	Prupe.2G219200	MODIFIER	downstream_gene_variant	.	protein_coding	-1
24818254	T	C	Prupe.2G219200	MODERATE	missense_variant	p.Lys217Glu	protein_coding	2
24818254	T	C	Prupe.2G219200	MODERATE	missense_variant	p.Lys217Glu	protein_coding	1
24818254	T	C	Prupe.2G219300	MODIFIER	downstream_gene_variant	.	protein_coding	-1
24862693	A	T	Prupe.2G220000	MODIFIER	upstream_gene_variant	.	protein_coding	-1
24862693	A	T	Prupe.2G220100	MODIFIER	intron_variant	.	protein_coding	4
24872858	G	A	Prupe.2G220200	MODIFIER	3_prime_UTR_variant	.	protein_coding	18
24872858	G	A	Prupe.2G220200	MODIFIER	3_prime_UTR_variant	.	protein_coding	17
24872907	T	C	Prupe.2G220200	MODIFIER	3_prime_UTR_variant	.	protein_coding	18
24872907	T	C	Prupe.2G220200	MODIFIER	3_prime_UTR_variant	.	protein_coding	17
24910493	G	A	Prupe.2G220700	MODIFIER	upstream_gene_variant	.	protein_coding	-1
24910493	G	A	Prupe.2G220900	MODIFIER	upstream_gene_variant	.	protein_coding	-1
24910493	G	A	Prupe.2G220800	MODIFIER	downstream_gene_variant	.	protein_coding	-1
24910493	G	A	Prupe.2G220800-Prupe.2G220900	MODIFIER	intergenic_region	.	.	-1
24910535	A	G	Prupe.2G220700	MODIFIER	upstream_gene_variant	.	protein_coding	-1
24910535	A	G	Prupe.2G220900	MODIFIER	upstream_gene_variant	.	protein_coding	-1
24910535	A	G	Prupe.2G220800	MODIFIER	downstream_gene_variant	.	protein_coding	-1
24910535	A	G	Prupe.2G220800-Prupe.2G220900	MODIFIER	intergenic_region	.	.	-1
24910669	T	G	Prupe.2G220700	MODIFIER	upstream_gene_variant	.	protein_coding	-1
24910669	T	G	Prupe.2G220900	MODIFIER	upstream_gene_variant	.	protein_coding	-1
24910669	T	G	Prupe.2G220800	MODIFIER	downstream_gene_variant	.	protein_coding	-1
24910669	T	G	Prupe.2G220800-Prupe.2G220900	MODIFIER	intergenic_region	.	.	-1
24912548	G	A	Prupe.2G220900	LOW	splice_region_variant&intron_variant	.	protein_coding	3
24912548	G	A	Prupe.2G220800	MODIFIER	downstream_gene_variant	.	protein_coding	-1
24912956	A	G	Prupe.2G220800	MODIFIER	downstream_gene_variant	.	protein_coding	-1
24912956	A	G	Prupe.2G220900	MODIFIER	intron_variant	.	protein_coding	3
24912988	A	G	Prupe.2G220800	MODIFIER	downstream_gene_variant	.	protein_coding	-1
24912988	A	G	Prupe.2G220900	MODIFIER	intron_variant	.	protein_coding	3
24949050	C	T	Prupe.2G221400	MODIFIER	downstream_gene_variant	.	protein_coding	-1
24949050	C	T	Prupe.2G221500	MODIFIER	intron_variant	.	protein_coding	15
24963960	T	A	Prupe.2G221700	LOW	splice_region_variant&intron_variant	.	protein_coding	8
24963960	T	A	Prupe.2G221600	MODIFIER	downstream_gene_variant	.	protein_coding	-1
24963960	T	A	Prupe.2G221800	MODIFIER	downstream_gene_variant	.	protein_coding	-1
24963962	T	C	Prupe.2G221700	LOW	splice_region_variant&intron_variant	.	protein_coding	8
24963962	T	C	Prupe.2G221600	MODIFIER	downstream_gene_variant	.	protein_coding	-1
24963962	T	C	Prupe.2G221800	MODIFIER	downstream_gene_variant	.	protein_coding	-1
24972619	G	A	Prupe.2G221900	LOW	synonymous_variant	p.Thr192Thr	protein_coding	5
24972619	G	A	Prupe.2G221800	MODIFIER	upstream_gene_variant	.	protein_coding	-1
24972619	G	A	Prupe.2G222000	MODIFIER	upstream_gene_variant	.	protein_coding	-1
24972619	G	A	Prupe.2G222100	MODIFIER	downstream_gene_variant	.	protein_coding	-1
24972640	C	T	Prupe.2G221900	LOW	synonymous_variant	p.Phe199Phe	protein_coding	5
24972640	C	T	Prupe.2G221800	MODIFIER	upstream_gene_variant	.	protein_coding	-1
24972640	C	T	Prupe.2G222000	MODIFIER	upstream_gene_variant	.	protein_coding	-1
24972640	C	T	Prupe.2G222100	MODIFIER	downstream_gene_variant	.	protein_coding	-1
24972743	A	G	Prupe.2G221800	MODIFIER	upstream_gene_variant	.	protein_coding	-1
24972743	A	G	Prupe.2G222000	MODIFIER	upstream_gene_variant	.	protein_coding	-1
24972743	A	G	Prupe.2G222100	MODIFIER	downstream_gene_variant	.	protein_coding	-1
24972743	A	G	Prupe.2G221900	MODIFIER	intron_variant	.	protein_coding	5
24979835	C	T	Prupe.2G222200	MODIFIER	upstream_gene_variant	.	protein_coding	-1
24979835	C	T	Prupe.2G222100	MODIFIER	upstream_gene_variant	.	protein_coding	-1
24979835	C	T	Prupe.2G222000	MODIFIER	downstream_gene_variant	.	protein_coding	-1
24979835	C	T	Prupe.2G222100	MODIFIER	intron_variant	.	protein_coding	2
24979835	C	T	Prupe.2G222100	MODIFIER	intron_variant	.	protein_coding	1
24980639	G	C	Prupe.2G222200	MODIFIER	upstream_gene_variant	.	protein_coding	-1
24980639	G	C	Prupe.2G222100	MODIFIER	upstream_gene_variant	.	protein_coding	-1
24980639	G	C	Prupe.2G222100	MODIFIER	intron_variant	.	protein_coding	1
24980690	A	G	Prupe.2G222200	MODIFIER	upstream_gene_variant	.	protein_coding	-1
24980690	A	G	Prupe.2G222100	MODIFIER	upstream_gene_variant	.	protein_coding	-1
24980690	A	G	Prupe.2G222100	MODIFIER	intron_variant	.	protein_coding	1
24980704	C	T	Prupe.2G222200	MODIFIER	upstream_gene_variant	.	protein_coding	-1
24980704	C	T	Prupe.2G222100	MODIFIER	upstream_gene_variant	.	protein_coding	-1
24980704	C	T	Prupe.2G222100	MODIFIER	intron_variant	.	protein_coding	1
24980738	A	T	Prupe.2G222200	MODIFIER	upstream_gene_variant	.	protein_coding	-1
24980738	A	T	Prupe.2G222100	MODIFIER	upstream_gene_variant	.	protein_coding	-1
24980738	A	T	Prupe.2G222100	MODIFIER	intron_variant	.	protein_coding	1
25052086	G	T	Prupe.2G223000	MODIFIER	intron_variant	.	protein_coding	5
25052095	T	C	Prupe.2G223000	MODIFIER	intron_variant	.	protein_coding	5
25052106	T	C	Prupe.2G223000	MODIFIER	intron_variant	.	protein_coding	5
25052354	T	G	Prupe.2G223000	LOW	synonymous_variant	p.Leu426Leu	protein_coding	6
25052360	C	T	Prupe.2G223000	LOW	synonymous_variant	p.Pro428Pro	protein_coding	6
25065821	T	G	Prupe.2G223400	MODIFIER	3_prime_UTR_variant	.	protein_coding	4
25065821	T	G	Prupe.2G223300	MODIFIER	downstream_gene_variant	.	protein_coding	-1
25066121	T	A	Prupe.2G223300	MODIFIER	downstream_gene_variant	.	protein_coding	-1
25066121	T	A	Prupe.2G223400	MODIFIER	intron_variant	.	protein_coding	3
25066185	G	A	Prupe.2G223300	MODIFIER	downstream_gene_variant	.	protein_coding	-1
25066185	G	A	Prupe.2G223400	MODIFIER	intron_variant	.	protein_coding	3
25099063	C	G	Prupe.2G223700	MODERATE	missense_variant	p.Pro556Ala	protein_coding	7
25099063	C	G	Prupe.2G223700	MODERATE	missense_variant	p.Pro481Ala	protein_coding	6
25099063	C	G	Prupe.2G223700	MODERATE	missense_variant	p.Pro555Ala	protein_coding	7
25099063	C	G	Prupe.2G223700	MODERATE	missense_variant	p.Pro511Ala	protein_coding	7
25099063	C	G	Prupe.2G223800	MODIFIER	upstream_gene_variant	.	protein_coding	-1
25099107	A	G	Prupe.2G223700	LOW	synonymous_variant	p.Ser570Ser	protein_coding	7
25099107	A	G	Prupe.2G223700	LOW	synonymous_variant	p.Ser495Ser	protein_coding	6
25099107	A	G	Prupe.2G223700	LOW	synonymous_variant	p.Ser569Ser	protein_coding	7
25099107	A	G	Prupe.2G223700	LOW	synonymous_variant	p.Ser525Ser	protein_coding	7
25099107	A	G	Prupe.2G223800	MODIFIER	upstream_gene_variant	.	protein_coding	-1
25187034	G	A	Prupe.2G224500	MODERATE	missense_variant	p.Val320Ile	protein_coding	3
25187034	G	A	Prupe.2G224400	MODIFIER	downstream_gene_variant	.	protein_coding	-1
25187532	C	A	Prupe.2G224500	MODERATE	missense_variant	p.His486Asn	protein_coding	3
25187532	C	A	Prupe.2G224400	MODIFIER	downstream_gene_variant	.	protein_coding	-1
25204207	A	C	Prupe.2G224600	MODIFIER	downstream_gene_variant	.	protein_coding	-1
25204207	A	C	Prupe.2G224800	MODIFIER	downstream_gene_variant	.	protein_coding	-1
25204207	A	C	Prupe.2G224700	MODIFIER	intron_variant	.	protein_coding	1
25204233	T	G	Prupe.2G224600	MODIFIER	downstream_gene_variant	.	protein_coding	-1
25204233	T	G	Prupe.2G224800	MODIFIER	downstream_gene_variant	.	protein_coding	-1
25204233	T	G	Prupe.2G224700	MODIFIER	intron_variant	.	protein_coding	1
25204253	A	C	Prupe.2G224600	MODIFIER	downstream_gene_variant	.	protein_coding	-1
25204253	A	C	Prupe.2G224800	MODIFIER	downstream_gene_variant	.	protein_coding	-1
25204253	A	C	Prupe.2G224700	MODIFIER	intron_variant	.	protein_coding	1
25204322	T	C	Prupe.2G224700	MODIFIER	5_prime_UTR_variant	.	protein_coding	1
25204322	T	C	Prupe.2G224600	MODIFIER	downstream_gene_variant	.	protein_coding	-1
25204322	T	C	Prupe.2G224800	MODIFIER	downstream_gene_variant	.	protein_coding	-1
25227140	A	G	Prupe.2G225300	MODERATE	missense_variant	p.Thr52Ala	protein_coding	2
25227140	A	G	Prupe.2G225100	MODIFIER	upstream_gene_variant	.	protein_coding	-1
25227140	A	G	Prupe.2G225200	MODIFIER	upstream_gene_variant	.	protein_coding	-1
25240153	C	A	Prupe.2G225400	MODIFIER	downstream_gene_variant	.	protein_coding	-1
25240153	C	A	Prupe.2G225600	MODIFIER	downstream_gene_variant	.	protein_coding	-1
25240153	C	A	Prupe.2G225500	MODIFIER	intron_variant	.	protein_coding	1
25240205	A	G	Prupe.2G225400	MODIFIER	downstream_gene_variant	.	protein_coding	-1
25240205	A	G	Prupe.2G225600	MODIFIER	downstream_gene_variant	.	protein_coding	-1
25240205	A	G	Prupe.2G225500	MODIFIER	intron_variant	.	protein_coding	1
25270894	A	G	Prupe.2G226000	LOW	synonymous_variant	p.Tyr185Tyr	protein_coding	1
25270894	A	G	Prupe.2G226100	MODIFIER	upstream_gene_variant	.	protein_coding	-1
25270894	A	G	Prupe.2G226200	MODIFIER	downstream_gene_variant	.	protein_coding	-1
25272609	A	G	Prupe.2G226100	MODIFIER	5_prime_UTR_variant	.	protein_coding	1
25272609	A	G	Prupe.2G226000	MODIFIER	upstream_gene_variant	.	protein_coding	-1
25272609	A	G	Prupe.2G226200	MODIFIER	downstream_gene_variant	.	protein_coding	-1
25272732	C	T	Prupe.2G226100	LOW	synonymous_variant	p.Ala2Ala	protein_coding	1
25272732	C	T	Prupe.2G226000	MODIFIER	upstream_gene_variant	.	protein_coding	-1
25272732	C	T	Prupe.2G226200	MODIFIER	downstream_gene_variant	.	protein_coding	-1
25315149	A	G	Prupe.2G227200	MODIFIER	5_prime_UTR_variant	.	protein_coding	1
25315149	A	G	Prupe.2G227100	MODIFIER	downstream_gene_variant	.	protein_coding	-1
25315149	A	G	Prupe.2G227300	MODIFIER	downstream_gene_variant	.	protein_coding	-1
25401696	T	G	Prupe.2G228200	MODIFIER	upstream_gene_variant	.	protein_coding	-1
25401696	T	G	Prupe.2G228100	MODIFIER	downstream_gene_variant	.	protein_coding	-1
25401696	T	G	Prupe.2G228100-Prupe.2G228200	MODIFIER	intergenic_region	.	.	-1
25433953	C	T	Prupe.2G229000	MODERATE	missense_variant	p.Ala64Thr	protein_coding	3
25433953	C	T	Prupe.2G229100	MODIFIER	upstream_gene_variant	.	protein_coding	-1
25433953	C	T	Prupe.2G228800	MODIFIER	downstream_gene_variant	.	protein_coding	-1
25433953	C	T	Prupe.2G228900	MODIFIER	downstream_gene_variant	.	protein_coding	-1
25433953	C	T	Prupe.2G229000	MODIFIER	intron_variant	.	protein_coding	2
25451199	G	A	Prupe.2G229400	LOW	synonymous_variant	p.Thr220Thr	protein_coding	1
25451199	G	A	Prupe.2G229400	MODIFIER	5_prime_UTR_variant	.	protein_coding	2
25451199	G	A	Prupe.2G229200	MODIFIER	upstream_gene_variant	.	protein_coding	-1
25451199	G	A	Prupe.2G229500	MODIFIER	upstream_gene_variant	.	protein_coding	-1
25451199	G	A	Prupe.2G229300	MODIFIER	downstream_gene_variant	.	protein_coding	-1
25451410	C	G	Prupe.2G229400	MODERATE	missense_variant	p.Gln291Glu	protein_coding	1
25451410	C	G	Prupe.2G229400	MODERATE	missense_variant	p.Gln66Glu	protein_coding	2
25451410	C	G	Prupe.2G229200	MODIFIER	upstream_gene_variant	.	protein_coding	-1
25451410	C	G	Prupe.2G229500	MODIFIER	upstream_gene_variant	.	protein_coding	-1
25451410	C	G	Prupe.2G229300	MODIFIER	downstream_gene_variant	.	protein_coding	-1
25455094	A	T	Prupe.2G229500	LOW	splice_region_variant&intron_variant	.	protein_coding	2
25455094	A	T	Prupe.2G229600	MODIFIER	upstream_gene_variant	.	protein_coding	-1
25455094	A	T	Prupe.2G229400	MODIFIER	downstream_gene_variant	.	protein_coding	-1
25475392	G	A	Prupe.2G229900	MODIFIER	upstream_gene_variant	.	protein_coding	-1
25475392	G	A	Prupe.2G229800	MODIFIER	downstream_gene_variant	.	protein_coding	-1
25475392	G	A	Prupe.2G230000	MODIFIER	intron_variant	.	protein_coding	9
25475392	G	A	Prupe.2G230000	MODIFIER	intron_variant	.	protein_coding	8
25475392	G	A	Prupe.2G230000	MODIFIER	intron_variant	.	protein_coding	3
25504829	C	T	Prupe.2G230500	MODIFIER	3_prime_UTR_variant	.	protein_coding	7
25504829	C	T	Prupe.2G230600	MODIFIER	upstream_gene_variant	.	protein_coding	-1
25504829	C	T	Prupe.2G230400	MODIFIER	downstream_gene_variant	.	protein_coding	-1
25504829	C	T	Prupe.2G230700	MODIFIER	downstream_gene_variant	.	protein_coding	-1
25504834	T	G	Prupe.2G230500	MODIFIER	3_prime_UTR_variant	.	protein_coding	7
25504834	T	G	Prupe.2G230600	MODIFIER	upstream_gene_variant	.	protein_coding	-1
25504834	T	G	Prupe.2G230400	MODIFIER	downstream_gene_variant	.	protein_coding	-1
25504834	T	G	Prupe.2G230700	MODIFIER	downstream_gene_variant	.	protein_coding	-1
25504866	T	C	Prupe.2G230500	HIGH	splice_donor_variant&intron_variant	.	protein_coding	7
25504866	T	C	Prupe.2G230600	MODIFIER	upstream_gene_variant	.	protein_coding	-1
25504866	T	C	Prupe.2G230400	MODIFIER	downstream_gene_variant	.	protein_coding	-1
25504866	T	C	Prupe.2G230700	MODIFIER	downstream_gene_variant	.	protein_coding	-1
25505051	C	T	Prupe.2G230500	MODIFIER	3_prime_UTR_variant	.	protein_coding	8
25505051	C	T	Prupe.2G230600	MODIFIER	upstream_gene_variant	.	protein_coding	-1
25505051	C	T	Prupe.2G230400	MODIFIER	downstream_gene_variant	.	protein_coding	-1
25505051	C	T	Prupe.2G230700	MODIFIER	downstream_gene_variant	.	protein_coding	-1
25505061	A	G	Prupe.2G230500	MODIFIER	3_prime_UTR_variant	.	protein_coding	8
25505061	A	G	Prupe.2G230600	MODIFIER	upstream_gene_variant	.	protein_coding	-1
25505061	A	G	Prupe.2G230400	MODIFIER	downstream_gene_variant	.	protein_coding	-1
25505061	A	G	Prupe.2G230700	MODIFIER	downstream_gene_variant	.	protein_coding	-1
25505065	G	C	Prupe.2G230500	MODIFIER	3_prime_UTR_variant	.	protein_coding	8
25505065	G	C	Prupe.2G230600	MODIFIER	upstream_gene_variant	.	protein_coding	-1
25505065	G	C	Prupe.2G230400	MODIFIER	downstream_gene_variant	.	protein_coding	-1
25505065	G	C	Prupe.2G230700	MODIFIER	downstream_gene_variant	.	protein_coding	-1
25513395	G	A	Prupe.2G230700	LOW	splice_region_variant&intron_variant	.	protein_coding	1
25513395	G	A	Prupe.2G230800	MODIFIER	upstream_gene_variant	.	protein_coding	-1
25513398	A	G	Prupe.2G230700	LOW	splice_region_variant&intron_variant	.	protein_coding	1
25513398	A	G	Prupe.2G230800	MODIFIER	upstream_gene_variant	.	protein_coding	-1
25513413	G	A	Prupe.2G230700	MODIFIER	5_prime_UTR_variant	.	protein_coding	1
25513413	G	A	Prupe.2G230800	MODIFIER	upstream_gene_variant	.	protein_coding	-1
25513416	C	A	Prupe.2G230700	MODIFIER	5_prime_UTR_variant	.	protein_coding	1
25513416	C	A	Prupe.2G230800	MODIFIER	upstream_gene_variant	.	protein_coding	-1
25525711	C	G	Prupe.2G231000	MODERATE	missense_variant	p.Ser669Arg	protein_coding	1
25525711	C	G	Prupe.2G230900	MODIFIER	upstream_gene_variant	.	protein_coding	-1
25525711	C	G	Prupe.2G231100	MODIFIER	downstream_gene_variant	.	protein_coding	-1
25525779	G	A	Prupe.2G231000	MODERATE	missense_variant	p.Ser692Asn	protein_coding	1
25525779	G	A	Prupe.2G230900	MODIFIER	upstream_gene_variant	.	protein_coding	-1
25525779	G	A	Prupe.2G231100	MODIFIER	downstream_gene_variant	.	protein_coding	-1
25525787	C	T	Prupe.2G231000	MODERATE	missense_variant	p.Pro695Ser	protein_coding	1
25525787	C	T	Prupe.2G230900	MODIFIER	upstream_gene_variant	.	protein_coding	-1
25525787	C	T	Prupe.2G231100	MODIFIER	downstream_gene_variant	.	protein_coding	-1
25536347	G	A	Prupe.2G231200	LOW	synonymous_variant	p.Tyr1669Tyr	protein_coding	11
25536347	G	A	Prupe.2G231200	LOW	synonymous_variant	p.Tyr1652Tyr	protein_coding	11
25536347	G	A	Prupe.2G231200	LOW	synonymous_variant	p.Tyr1665Tyr	protein_coding	11
25536347	G	A	Prupe.2G231200	LOW	synonymous_variant	p.Tyr1666Tyr	protein_coding	11
25536347	G	A	Prupe.2G231200	LOW	synonymous_variant	p.Tyr1576Tyr	protein_coding	10
25536347	G	A	Prupe.2G231200	LOW	synonymous_variant	p.Tyr1580Tyr	protein_coding	10
25536347	G	A	Prupe.2G231200	LOW	synonymous_variant	p.Tyr1598Tyr	protein_coding	10
25536347	G	A	Prupe.2G231200	LOW	synonymous_variant	p.Tyr1611Tyr	protein_coding	10
25536347	G	A	Prupe.2G231200	LOW	synonymous_variant	p.Tyr1615Tyr	protein_coding	10
25536347	G	A	Prupe.2G231200	LOW	synonymous_variant	p.Tyr1630Tyr	protein_coding	11
25536347	G	A	Prupe.2G231200	LOW	synonymous_variant	p.Tyr1634Tyr	protein_coding	11
25536347	G	A	Prupe.2G231200	LOW	synonymous_variant	p.Tyr1648Tyr	protein_coding	11
25536347	G	A	Prupe.2G231100	MODIFIER	upstream_gene_variant	.	protein_coding	-1
25536347	G	A	Prupe.2G231200	MODIFIER	downstream_gene_variant	.	protein_coding	-1
25555197	T	A	Prupe.2G231500	MODERATE	missense_variant&splice_region_variant	p.Cys187Ser	protein_coding	4
25555197	T	A	Prupe.2G231400	MODIFIER	upstream_gene_variant	.	protein_coding	-1
25555197	T	A	Prupe.2G231600	MODIFIER	downstream_gene_variant	.	protein_coding	-1
25555217	G	T	Prupe.2G231400	MODIFIER	upstream_gene_variant	.	protein_coding	-1
25555217	G	T	Prupe.2G231600	MODIFIER	downstream_gene_variant	.	protein_coding	-1
25555217	G	T	Prupe.2G231500	MODIFIER	intron_variant	.	protein_coding	4
25555220	C	T	Prupe.2G231400	MODIFIER	upstream_gene_variant	.	protein_coding	-1
25555220	C	T	Prupe.2G231600	MODIFIER	downstream_gene_variant	.	protein_coding	-1
25555220	C	T	Prupe.2G231500	MODIFIER	intron_variant	.	protein_coding	4
25555243	A	G	Prupe.2G231400	MODIFIER	upstream_gene_variant	.	protein_coding	-1
25555243	A	G	Prupe.2G231600	MODIFIER	downstream_gene_variant	.	protein_coding	-1
25555243	A	G	Prupe.2G231500	MODIFIER	intron_variant	.	protein_coding	4
25555288	A	G	Prupe.2G231400	MODIFIER	upstream_gene_variant	.	protein_coding	-1
25555288	A	G	Prupe.2G231600	MODIFIER	downstream_gene_variant	.	protein_coding	-1
25555288	A	G	Prupe.2G231500	MODIFIER	intron_variant	.	protein_coding	4
25575182	C	A	Prupe.2G231700	MODIFIER	upstream_gene_variant	.	protein_coding	-1
25575182	C	A	Prupe.2G231800	MODIFIER	upstream_gene_variant	.	protein_coding	-1
25575182	C	A	Prupe.2G231600	MODIFIER	upstream_gene_variant	.	protein_coding	-1
25575182	C	A	Prupe.2G231900	MODIFIER	downstream_gene_variant	.	protein_coding	-1
25575182	C	A	Prupe.2G232000	MODIFIER	downstream_gene_variant	.	protein_coding	-1
25575182	C	A	Prupe.2G231800-Prupe.2G231900	MODIFIER	intergenic_region	.	.	-1
25575192	G	C	Prupe.2G231700	MODIFIER	upstream_gene_variant	.	protein_coding	-1
25575192	G	C	Prupe.2G231800	MODIFIER	upstream_gene_variant	.	protein_coding	-1
25575192	G	C	Prupe.2G231600	MODIFIER	upstream_gene_variant	.	protein_coding	-1
25575192	G	C	Prupe.2G231900	MODIFIER	downstream_gene_variant	.	protein_coding	-1
25575192	G	C	Prupe.2G232000	MODIFIER	downstream_gene_variant	.	protein_coding	-1
25575192	G	C	Prupe.2G231800-Prupe.2G231900	MODIFIER	intergenic_region	.	.	-1
25575211	C	T	Prupe.2G231700	MODIFIER	upstream_gene_variant	.	protein_coding	-1
25575211	C	T	Prupe.2G231800	MODIFIER	upstream_gene_variant	.	protein_coding	-1
25575211	C	T	Prupe.2G231900	MODIFIER	downstream_gene_variant	.	protein_coding	-1
25575211	C	T	Prupe.2G232000	MODIFIER	downstream_gene_variant	.	protein_coding	-1
25575211	C	T	Prupe.2G231800-Prupe.2G231900	MODIFIER	intergenic_region	.	.	-1
25575358	G	A	Prupe.2G231900	MODIFIER	3_prime_UTR_variant	.	protein_coding	6
25575358	G	A	Prupe.2G231700	MODIFIER	upstream_gene_variant	.	protein_coding	-1
25575358	G	A	Prupe.2G231800	MODIFIER	upstream_gene_variant	.	protein_coding	-1
25575358	G	A	Prupe.2G232000	MODIFIER	downstream_gene_variant	.	protein_coding	-1
25575442	A	C	Prupe.2G231900	MODIFIER	3_prime_UTR_variant	.	protein_coding	6
25575442	A	C	Prupe.2G231700	MODIFIER	upstream_gene_variant	.	protein_coding	-1
25575442	A	C	Prupe.2G231800	MODIFIER	upstream_gene_variant	.	protein_coding	-1
25575442	A	C	Prupe.2G232000	MODIFIER	downstream_gene_variant	.	protein_coding	-1
25577054	G	A	Prupe.2G231700	MODIFIER	upstream_gene_variant	.	protein_coding	-1
25577054	G	A	Prupe.2G231800	MODIFIER	upstream_gene_variant	.	protein_coding	-1
25577054	G	A	Prupe.2G232000	MODIFIER	downstream_gene_variant	.	protein_coding	-1
25577054	G	A	Prupe.2G232100	MODIFIER	downstream_gene_variant	.	protein_coding	-1
25577054	G	A	Prupe.2G231900	MODIFIER	intron_variant	.	protein_coding	3
25618573	C	T	Prupe.2G232600	MODIFIER	3_prime_UTR_variant	.	protein_coding	2
25618573	C	T	Prupe.2G232700	MODIFIER	downstream_gene_variant	.	protein_coding	-1
25618573	C	T	Prupe.2G232800	MODIFIER	downstream_gene_variant	.	protein_coding	-1
25618573	C	T	Prupe.2G232600	MODIFIER	intron_variant	.	protein_coding	1
25628489	G	C	Prupe.2G232800	MODIFIER	upstream_gene_variant	.	protein_coding	-1
25628489	G	C	Prupe.2G232900	MODIFIER	upstream_gene_variant	.	protein_coding	-1
25628489	G	C	Prupe.2G233000	MODIFIER	downstream_gene_variant	.	protein_coding	-1
25628489	G	C	Prupe.2G232800-Prupe.2G232900	MODIFIER	intergenic_region	.	.	-1
25628504	A	C	Prupe.2G232800	MODIFIER	upstream_gene_variant	.	protein_coding	-1
25628504	A	C	Prupe.2G232900	MODIFIER	upstream_gene_variant	.	protein_coding	-1
25628504	A	C	Prupe.2G233000	MODIFIER	downstream_gene_variant	.	protein_coding	-1
25628504	A	C	Prupe.2G232800-Prupe.2G232900	MODIFIER	intergenic_region	.	.	-1
25628549	G	A	Prupe.2G232800	MODIFIER	upstream_gene_variant	.	protein_coding	-1
25628549	G	A	Prupe.2G232900	MODIFIER	upstream_gene_variant	.	protein_coding	-1
25628549	G	A	Prupe.2G233000	MODIFIER	downstream_gene_variant	.	protein_coding	-1
25628549	G	A	Prupe.2G232800-Prupe.2G232900	MODIFIER	intergenic_region	.	.	-1
25628560	C	A	Prupe.2G232800	MODIFIER	upstream_gene_variant	.	protein_coding	-1
25628560	C	A	Prupe.2G232900	MODIFIER	upstream_gene_variant	.	protein_coding	-1
25628560	C	A	Prupe.2G233000	MODIFIER	downstream_gene_variant	.	protein_coding	-1
25628560	C	A	Prupe.2G232800-Prupe.2G232900	MODIFIER	intergenic_region	.	.	-1
25638155	T	A	Prupe.2G233000	MODIFIER	upstream_gene_variant	.	protein_coding	-1
25638155	T	A	Prupe.2G233200	MODIFIER	upstream_gene_variant	.	protein_coding	-1
25638155	T	A	Prupe.2G233300	MODIFIER	downstream_gene_variant	.	protein_coding	-1
25638155	T	A	Prupe.2G233100	MODIFIER	intron_variant	.	protein_coding	1
25666794	T	C	Prupe.2G233800	LOW	synonymous_variant	p.Leu10Leu	protein_coding	1
25666794	T	C	Prupe.2G233900	MODIFIER	upstream_gene_variant	.	protein_coding	-1
25666794	T	C	Prupe.2G233700	MODIFIER	downstream_gene_variant	.	protein_coding	-1
25666802	A	C	Prupe.2G233800	LOW	synonymous_variant	p.Pro12Pro	protein_coding	1
25666802	A	C	Prupe.2G233900	MODIFIER	upstream_gene_variant	.	protein_coding	-1
25666802	A	C	Prupe.2G233700	MODIFIER	downstream_gene_variant	.	protein_coding	-1
25666804	C	T	Prupe.2G233800	MODERATE	missense_variant	p.Pro13Leu	protein_coding	1
25666804	C	T	Prupe.2G233900	MODIFIER	upstream_gene_variant	.	protein_coding	-1
25666804	C	T	Prupe.2G233700	MODIFIER	downstream_gene_variant	.	protein_coding	-1
25666805	C	G	Prupe.2G233800	LOW	synonymous_variant	p.Pro13Pro	protein_coding	1
25666805	C	G	Prupe.2G233900	MODIFIER	upstream_gene_variant	.	protein_coding	-1
25666805	C	G	Prupe.2G233700	MODIFIER	downstream_gene_variant	.	protein_coding	-1
25666807	T	C	Prupe.2G233800	MODERATE	missense_variant	p.Leu14Pro	protein_coding	1
25666807	T	C	Prupe.2G233900	MODIFIER	upstream_gene_variant	.	protein_coding	-1
25666807	T	C	Prupe.2G233700	MODIFIER	downstream_gene_variant	.	protein_coding	-1
25666814	G	A	Prupe.2G233800	LOW	synonymous_variant	p.Pro16Pro	protein_coding	1
25666814	G	A	Prupe.2G233900	MODIFIER	upstream_gene_variant	.	protein_coding	-1
25666814	G	A	Prupe.2G233700	MODIFIER	downstream_gene_variant	.	protein_coding	-1
25666817	A	G	Prupe.2G233800	LOW	synonymous_variant	p.Pro17Pro	protein_coding	1
25666817	A	G	Prupe.2G233900	MODIFIER	upstream_gene_variant	.	protein_coding	-1
25666817	A	G	Prupe.2G233700	MODIFIER	downstream_gene_variant	.	protein_coding	-1
25666836	T	C	Prupe.2G233800	MODERATE	missense_variant	p.Ser24Pro	protein_coding	1
25666836	T	C	Prupe.2G233900	MODIFIER	upstream_gene_variant	.	protein_coding	-1
25666836	T	C	Prupe.2G233700	MODIFIER	downstream_gene_variant	.	protein_coding	-1
25666859	G	A	Prupe.2G233800	MODERATE	missense_variant	p.Met31Ile	protein_coding	1
25666859	G	A	Prupe.2G233900	MODIFIER	upstream_gene_variant	.	protein_coding	-1
25666859	G	A	Prupe.2G233700	MODIFIER	downstream_gene_variant	.	protein_coding	-1
25673975	T	C	Prupe.2G234100	MODIFIER	5_prime_UTR_variant	.	protein_coding	1
25673975	T	C	Prupe.2G234200	MODIFIER	upstream_gene_variant	.	protein_coding	-1
25673975	T	C	Prupe.2G233900	MODIFIER	downstream_gene_variant	.	protein_coding	-1
25673975	T	C	Prupe.2G234000	MODIFIER	downstream_gene_variant	.	protein_coding	-1
25673981	C	A	Prupe.2G234100	MODIFIER	5_prime_UTR_variant	.	protein_coding	1
25673981	C	A	Prupe.2G234200	MODIFIER	upstream_gene_variant	.	protein_coding	-1
25673981	C	A	Prupe.2G233900	MODIFIER	downstream_gene_variant	.	protein_coding	-1
25673981	C	A	Prupe.2G234000	MODIFIER	downstream_gene_variant	.	protein_coding	-1
25673983	T	C	Prupe.2G234100	MODIFIER	5_prime_UTR_variant	.	protein_coding	1
25673983	T	C	Prupe.2G234200	MODIFIER	upstream_gene_variant	.	protein_coding	-1
25673983	T	C	Prupe.2G233900	MODIFIER	downstream_gene_variant	.	protein_coding	-1
25673983	T	C	Prupe.2G234000	MODIFIER	downstream_gene_variant	.	protein_coding	-1
25674024	G	C	Prupe.2G234100	MODERATE	missense_variant	p.Ser10Thr	protein_coding	1
25674024	G	C	Prupe.2G234200	MODIFIER	upstream_gene_variant	.	protein_coding	-1
25674024	G	C	Prupe.2G233900	MODIFIER	downstream_gene_variant	.	protein_coding	-1
25674024	G	C	Prupe.2G234000	MODIFIER	downstream_gene_variant	.	protein_coding	-1
25674043	T	G	Prupe.2G234100	LOW	synonymous_variant	p.Leu16Leu	protein_coding	1
25674043	T	G	Prupe.2G234200	MODIFIER	upstream_gene_variant	.	protein_coding	-1
25674043	T	G	Prupe.2G233900	MODIFIER	downstream_gene_variant	.	protein_coding	-1
25674043	T	G	Prupe.2G234000	MODIFIER	downstream_gene_variant	.	protein_coding	-1
25674045	T	A	Prupe.2G234100	MODERATE	missense_variant	p.Val17Glu	protein_coding	1
25674045	T	A	Prupe.2G234200	MODIFIER	upstream_gene_variant	.	protein_coding	-1
25674045	T	A	Prupe.2G233900	MODIFIER	downstream_gene_variant	.	protein_coding	-1
25674045	T	A	Prupe.2G234000	MODIFIER	downstream_gene_variant	.	protein_coding	-1
25674087	T	G	Prupe.2G234100	LOW	synonymous_variant	p.Gly31Gly	protein_coding	1
25674087	T	G	Prupe.2G234200	MODIFIER	upstream_gene_variant	.	protein_coding	-1
25674087	T	G	Prupe.2G233900	MODIFIER	downstream_gene_variant	.	protein_coding	-1
25674087	T	G	Prupe.2G234000	MODIFIER	downstream_gene_variant	.	protein_coding	-1
25689024	A	T	Prupe.2G234300	LOW	synonymous_variant	p.Ser333Ser	protein_coding	3
25689024	A	T	Prupe.2G234400	MODIFIER	upstream_gene_variant	.	protein_coding	-1
25689069	C	A	Prupe.2G234300	MODERATE	missense_variant	p.Asn348Lys	protein_coding	3
25689069	C	A	Prupe.2G234400	MODIFIER	upstream_gene_variant	.	protein_coding	-1
25689149	G	A	Prupe.2G234300	MODERATE	missense_variant	p.Gly375Asp	protein_coding	3
25689149	G	A	Prupe.2G234400	MODIFIER	upstream_gene_variant	.	protein_coding	-1
25689178	G	T	Prupe.2G234300	MODERATE	missense_variant	p.Val385Phe	protein_coding	3
25689178	G	T	Prupe.2G234400	MODIFIER	upstream_gene_variant	.	protein_coding	-1
25689242	G	C	Prupe.2G234300	MODERATE	missense_variant	p.Arg406Thr	protein_coding	3
25689242	G	C	Prupe.2G234400	MODIFIER	upstream_gene_variant	.	protein_coding	-1
25710419	G	A	Prupe.2G234600	MODIFIER	upstream_gene_variant	.	protein_coding	-1
25710419	G	A	Prupe.2G234500-Prupe.2G234600	MODIFIER	intergenic_region	.	.	-1
25710427	C	G	Prupe.2G234600	MODIFIER	upstream_gene_variant	.	protein_coding	-1
25710427	C	G	Prupe.2G234500-Prupe.2G234600	MODIFIER	intergenic_region	.	.	-1
25710436	G	T	Prupe.2G234600	MODIFIER	upstream_gene_variant	.	protein_coding	-1
25710436	G	T	Prupe.2G234500-Prupe.2G234600	MODIFIER	intergenic_region	.	.	-1
25710444	G	A	Prupe.2G234600	MODIFIER	upstream_gene_variant	.	protein_coding	-1
25710444	G	A	Prupe.2G234500-Prupe.2G234600	MODIFIER	intergenic_region	.	.	-1
25710448	C	A	Prupe.2G234600	MODIFIER	upstream_gene_variant	.	protein_coding	-1
25710448	C	A	Prupe.2G234500-Prupe.2G234600	MODIFIER	intergenic_region	.	.	-1
25710506	T	G	Prupe.2G234600	MODIFIER	upstream_gene_variant	.	protein_coding	-1
25710506	T	G	Prupe.2G234500-Prupe.2G234600	MODIFIER	intergenic_region	.	.	-1
25710538	C	G	Prupe.2G234600	MODIFIER	upstream_gene_variant	.	protein_coding	-1
25710538	C	G	Prupe.2G234500-Prupe.2G234600	MODIFIER	intergenic_region	.	.	-1
25710547	G	A	Prupe.2G234600	MODIFIER	upstream_gene_variant	.	protein_coding	-1
25710547	G	A	Prupe.2G234500-Prupe.2G234600	MODIFIER	intergenic_region	.	.	-1
25710586	C	T	Prupe.2G234600	MODIFIER	upstream_gene_variant	.	protein_coding	-1
25710586	C	T	Prupe.2G234500-Prupe.2G234600	MODIFIER	intergenic_region	.	.	-1
25710590	A	G	Prupe.2G234600	MODIFIER	upstream_gene_variant	.	protein_coding	-1
25710590	A	G	Prupe.2G234500-Prupe.2G234600	MODIFIER	intergenic_region	.	.	-1
25710600	A	G	Prupe.2G234600	MODIFIER	upstream_gene_variant	.	protein_coding	-1
25710600	A	G	Prupe.2G234500-Prupe.2G234600	MODIFIER	intergenic_region	.	.	-1
25710759	A	G	Prupe.2G234600	MODIFIER	upstream_gene_variant	.	protein_coding	-1
25710759	A	G	Prupe.2G234500-Prupe.2G234600	MODIFIER	intergenic_region	.	.	-1
25710805	A	T	Prupe.2G234600	MODIFIER	upstream_gene_variant	.	protein_coding	-1
25710805	A	T	Prupe.2G234500-Prupe.2G234600	MODIFIER	intergenic_region	.	.	-1
25710817	C	T	Prupe.2G234600	MODIFIER	upstream_gene_variant	.	protein_coding	-1
25710817	C	T	Prupe.2G234500-Prupe.2G234600	MODIFIER	intergenic_region	.	.	-1
25710832	G	T	Prupe.2G234600	MODIFIER	upstream_gene_variant	.	protein_coding	-1
25710832	G	T	Prupe.2G234500-Prupe.2G234600	MODIFIER	intergenic_region	.	.	-1
25710851	A	G	Prupe.2G234600	MODIFIER	upstream_gene_variant	.	protein_coding	-1
25710851	A	G	Prupe.2G234500-Prupe.2G234600	MODIFIER	intergenic_region	.	.	-1
25710858	T	G	Prupe.2G234600	MODIFIER	upstream_gene_variant	.	protein_coding	-1
25710858	T	G	Prupe.2G234500-Prupe.2G234600	MODIFIER	intergenic_region	.	.	-1
25710970	G	T	Prupe.2G234600	MODIFIER	upstream_gene_variant	.	protein_coding	-1
25710970	G	T	Prupe.2G234500-Prupe.2G234600	MODIFIER	intergenic_region	.	.	-1
25736346	A	T	Prupe.2G235100	MODIFIER	upstream_gene_variant	.	protein_coding	-1
25736346	A	T	Prupe.2G234800	MODIFIER	downstream_gene_variant	.	protein_coding	-1
[truncated: 2,442 more rows]

## Sheet: Pp03
POS	REF	ALT	EFF[*].GENE	EFF[*].IMPACT	EFF[*].EFFECT	EFF[*].AA	EFF[*].BIOTYPE	a
79029	C	A	Prupe.3G000700	MODIFIER	downstream_gene_variant	.	protein_coding	-1
79029	C	A	Prupe.3G000600	MODIFIER	intron_variant	.	protein_coding	1
80932	C	G	Prupe.3G000600	MODIFIER	upstream_gene_variant	.	protein_coding	-1
80932	C	G	Prupe.3G000700	MODIFIER	intron_variant	.	protein_coding	3
80946	C	T	Prupe.3G000600	MODIFIER	upstream_gene_variant	.	protein_coding	-1
80946	C	T	Prupe.3G000700	MODIFIER	intron_variant	.	protein_coding	3
84059	T	C	Prupe.3G000600	MODIFIER	upstream_gene_variant	.	protein_coding	-1
84059	T	C	Prupe.3G000700	MODIFIER	intron_variant	.	protein_coding	1
84410	A	G	Prupe.3G000700	LOW	synonymous_variant	p.Leu727Leu	protein_coding	1
84410	A	G	Prupe.3G000600	MODIFIER	upstream_gene_variant	.	protein_coding	-1
104701	A	G	Prupe.3G001100	MODIFIER	upstream_gene_variant	.	protein_coding	-1
104701	A	G	Prupe.3G001200	MODIFIER	intron_variant	.	protein_coding	2
104912	G	A	Prupe.3G001100	MODIFIER	upstream_gene_variant	.	protein_coding	-1
104912	G	A	Prupe.3G001200	MODIFIER	intron_variant	.	protein_coding	3
113703	G	T	Prupe.3G001300	LOW	synonymous_variant	p.Gly100Gly	protein_coding	2
113703	G	T	Prupe.3G001200	MODIFIER	downstream_gene_variant	.	protein_coding	-1
113703	G	T	Prupe.3G001400	MODIFIER	downstream_gene_variant	.	protein_coding	-1
113703	G	T	Prupe.3G001300	MODIFIER	intron_variant	.	protein_coding	1
113769	C	G	Prupe.3G001200	MODIFIER	downstream_gene_variant	.	protein_coding	-1
113769	C	G	Prupe.3G001400	MODIFIER	downstream_gene_variant	.	protein_coding	-1
113769	C	G	Prupe.3G001300	MODIFIER	intron_variant	.	protein_coding	2
113769	C	G	Prupe.3G001300	MODIFIER	intron_variant	.	protein_coding	1
114191	A	G	Prupe.3G001300	MODERATE	missense_variant	p.Asn176Asp	protein_coding	4
114191	A	G	Prupe.3G001200	MODIFIER	downstream_gene_variant	.	protein_coding	-1
114191	A	G	Prupe.3G001400	MODIFIER	downstream_gene_variant	.	protein_coding	-1
114191	A	G	Prupe.3G001300	MODIFIER	intron_variant	.	protein_coding	1
114252	G	A	Prupe.3G001200	MODIFIER	downstream_gene_variant	.	protein_coding	-1
114252	G	A	Prupe.3G001400	MODIFIER	downstream_gene_variant	.	protein_coding	-1
114252	G	A	Prupe.3G001300	MODIFIER	intron_variant	.	protein_coding	4
114252	G	A	Prupe.3G001300	MODIFIER	intron_variant	.	protein_coding	1
114255	A	G	Prupe.3G001200	MODIFIER	downstream_gene_variant	.	protein_coding	-1
114255	A	G	Prupe.3G001400	MODIFIER	downstream_gene_variant	.	protein_coding	-1
114255	A	G	Prupe.3G001300	MODIFIER	intron_variant	.	protein_coding	4
114255	A	G	Prupe.3G001300	MODIFIER	intron_variant	.	protein_coding	1
114258	A	C	Prupe.3G001200	MODIFIER	downstream_gene_variant	.	protein_coding	-1
114258	A	C	Prupe.3G001400	MODIFIER	downstream_gene_variant	.	protein_coding	-1
114258	A	C	Prupe.3G001300	MODIFIER	intron_variant	.	protein_coding	4
114258	A	C	Prupe.3G001300	MODIFIER	intron_variant	.	protein_coding	1
118971	T	C	Prupe.3G001300	MODIFIER	downstream_gene_variant	.	protein_coding	-1
118971	T	C	Prupe.3G001500	MODIFIER	downstream_gene_variant	.	protein_coding	-1
118971	T	C	Prupe.3G001400	MODIFIER	intron_variant	.	protein_coding	1
118971	T	C	Prupe.3G001300	MODIFIER	intron_variant	.	protein_coding	12
118971	T	C	Prupe.3G001300	MODIFIER	intron_variant	.	protein_coding	1
119278	T	G	Prupe.3G001300	MODIFIER	downstream_gene_variant	.	protein_coding	-1
119278	T	G	Prupe.3G001500	MODIFIER	downstream_gene_variant	.	protein_coding	-1
119278	T	G	Prupe.3G001400	MODIFIER	intron_variant	.	protein_coding	1
119278	T	G	Prupe.3G001300	MODIFIER	intron_variant	.	protein_coding	12
119278	T	G	Prupe.3G001300	MODIFIER	intron_variant	.	protein_coding	1
119279	C	G	Prupe.3G001300	MODIFIER	downstream_gene_variant	.	protein_coding	-1
119279	C	G	Prupe.3G001500	MODIFIER	downstream_gene_variant	.	protein_coding	-1
119279	C	G	Prupe.3G001400	MODIFIER	intron_variant	.	protein_coding	1
119279	C	G	Prupe.3G001300	MODIFIER	intron_variant	.	protein_coding	12
119279	C	G	Prupe.3G001300	MODIFIER	intron_variant	.	protein_coding	1
119287	T	C	Prupe.3G001300	MODIFIER	downstream_gene_variant	.	protein_coding	-1
119287	T	C	Prupe.3G001500	MODIFIER	downstream_gene_variant	.	protein_coding	-1
119287	T	C	Prupe.3G001400	MODIFIER	intron_variant	.	protein_coding	1
119287	T	C	Prupe.3G001300	MODIFIER	intron_variant	.	protein_coding	12
119287	T	C	Prupe.3G001300	MODIFIER	intron_variant	.	protein_coding	1
155889	T	C	Prupe.3G002100	MODIFIER	upstream_gene_variant	.	protein_coding	-1
155889	T	C	Prupe.3G002200	MODIFIER	upstream_gene_variant	.	protein_coding	-1
155889	T	C	Prupe.3G002100-Prupe.3G002200	MODIFIER	intergenic_region	.	.	-1
155918	A	G	Prupe.3G002100	MODIFIER	upstream_gene_variant	.	protein_coding	-1
155918	A	G	Prupe.3G002200	MODIFIER	upstream_gene_variant	.	protein_coding	-1
155918	A	G	Prupe.3G002100-Prupe.3G002200	MODIFIER	intergenic_region	.	.	-1
156024	C	G	Prupe.3G002100	MODIFIER	upstream_gene_variant	.	protein_coding	-1
156024	C	G	Prupe.3G002200	MODIFIER	upstream_gene_variant	.	protein_coding	-1
156024	C	G	Prupe.3G002100-Prupe.3G002200	MODIFIER	intergenic_region	.	.	-1
163544	G	C	Prupe.3G002400	MODIFIER	upstream_gene_variant	.	protein_coding	-1
163544	G	C	Prupe.3G002200	MODIFIER	downstream_gene_variant	.	protein_coding	-1
163544	G	C	Prupe.3G002300	MODIFIER	intron_variant	.	protein_coding	3
163598	A	G	Prupe.3G002400	MODIFIER	upstream_gene_variant	.	protein_coding	-1
163598	A	G	Prupe.3G002200	MODIFIER	downstream_gene_variant	.	protein_coding	-1
163598	A	G	Prupe.3G002300	MODIFIER	intron_variant	.	protein_coding	3
163784	A	T	Prupe.3G002400	MODIFIER	upstream_gene_variant	.	protein_coding	-1
163784	A	T	Prupe.3G002200	MODIFIER	downstream_gene_variant	.	protein_coding	-1
163784	A	T	Prupe.3G002300	MODIFIER	intron_variant	.	protein_coding	3
163806	G	C	Prupe.3G002400	MODIFIER	upstream_gene_variant	.	protein_coding	-1
163806	G	C	Prupe.3G002200	MODIFIER	downstream_gene_variant	.	protein_coding	-1
163806	G	C	Prupe.3G002300	MODIFIER	intron_variant	.	protein_coding	3
167603	C	T	Prupe.3G002300	MODIFIER	downstream_gene_variant	.	protein_coding	-1
167603	C	T	Prupe.3G002500	MODIFIER	downstream_gene_variant	.	protein_coding	-1
167603	C	T	Prupe.3G002400	MODIFIER	intron_variant	.	protein_coding	3
167604	G	A	Prupe.3G002300	MODIFIER	downstream_gene_variant	.	protein_coding	-1
167604	G	A	Prupe.3G002500	MODIFIER	downstream_gene_variant	.	protein_coding	-1
167604	G	A	Prupe.3G002400	MODIFIER	intron_variant	.	protein_coding	3
167610	G	A	Prupe.3G002300	MODIFIER	downstream_gene_variant	.	protein_coding	-1
167610	G	A	Prupe.3G002500	MODIFIER	downstream_gene_variant	.	protein_coding	-1
167610	G	A	Prupe.3G002400	MODIFIER	intron_variant	.	protein_coding	3
167619	G	T	Prupe.3G002300	MODIFIER	downstream_gene_variant	.	protein_coding	-1
167619	G	T	Prupe.3G002500	MODIFIER	downstream_gene_variant	.	protein_coding	-1
167619	G	T	Prupe.3G002400	MODIFIER	intron_variant	.	protein_coding	3
178315	T	C	Prupe.3G002700	MODERATE	missense_variant	p.Asn1021Asp	protein_coding	20
178315	T	C	Prupe.3G002600	MODIFIER	3_prime_UTR_variant	.	protein_coding	2
178315	T	C	Prupe.3G002500	MODIFIER	upstream_gene_variant	.	protein_coding	-1
178325	C	A	Prupe.3G002700	LOW	synonymous_variant	p.Pro1017Pro	protein_coding	20
178325	C	A	Prupe.3G002600	MODIFIER	3_prime_UTR_variant	.	protein_coding	2
178325	C	A	Prupe.3G002500	MODIFIER	upstream_gene_variant	.	protein_coding	-1
199271	A	G	Prupe.3G002900	LOW	synonymous_variant	p.Val69Val	protein_coding	1
199271	A	G	Prupe.3G003000	MODIFIER	upstream_gene_variant	.	protein_coding	-1
199283	C	T	Prupe.3G002900	LOW	synonymous_variant	p.Tyr73Tyr	protein_coding	1
199283	C	T	Prupe.3G003000	MODIFIER	upstream_gene_variant	.	protein_coding	-1
250154	G	T	Prupe.3G003700	LOW	synonymous_variant	p.Ile411Ile	protein_coding	1
250154	G	T	Prupe.3G003600	MODIFIER	upstream_gene_variant	.	protein_coding	-1
250154	G	T	Prupe.3G003500	MODIFIER	downstream_gene_variant	.	protein_coding	-1
250154	G	T	Prupe.3G003800	MODIFIER	downstream_gene_variant	.	protein_coding	-1
250163	A	C	Prupe.3G003700	LOW	synonymous_variant	p.Val408Val	protein_coding	1
250163	A	C	Prupe.3G003600	MODIFIER	upstream_gene_variant	.	protein_coding	-1
250163	A	C	Prupe.3G003500	MODIFIER	downstream_gene_variant	.	protein_coding	-1
250163	A	C	Prupe.3G003800	MODIFIER	downstream_gene_variant	.	protein_coding	-1
251048	T	C	Prupe.3G003700	LOW	synonymous_variant	p.Ser113Ser	protein_coding	1
251048	T	C	Prupe.3G003600	MODIFIER	upstream_gene_variant	.	protein_coding	-1
251048	T	C	Prupe.3G003800	MODIFIER	downstream_gene_variant	.	protein_coding	-1
251168	T	G	Prupe.3G003700	LOW	synonymous_variant	p.Ala73Ala	protein_coding	1
251168	T	G	Prupe.3G003600	MODIFIER	upstream_gene_variant	.	protein_coding	-1
251168	T	G	Prupe.3G003800	MODIFIER	downstream_gene_variant	.	protein_coding	-1
300794	G	A	Prupe.3G004800	MODIFIER	upstream_gene_variant	.	protein_coding	-1
300794	G	A	Prupe.3G004900	MODIFIER	upstream_gene_variant	.	protein_coding	-1
300794	G	A	Prupe.3G005000	MODIFIER	downstream_gene_variant	.	protein_coding	-1
300794	G	A	Prupe.3G004900-Prupe.3G005000	MODIFIER	intergenic_region	.	.	-1
300832	T	C	Prupe.3G004800	MODIFIER	upstream_gene_variant	.	protein_coding	-1
300832	T	C	Prupe.3G004900	MODIFIER	upstream_gene_variant	.	protein_coding	-1
300832	T	C	Prupe.3G005000	MODIFIER	downstream_gene_variant	.	protein_coding	-1
300832	T	C	Prupe.3G004900-Prupe.3G005000	MODIFIER	intergenic_region	.	.	-1
300849	T	A	Prupe.3G004800	MODIFIER	upstream_gene_variant	.	protein_coding	-1
300849	T	A	Prupe.3G004900	MODIFIER	upstream_gene_variant	.	protein_coding	-1
300849	T	A	Prupe.3G005000	MODIFIER	downstream_gene_variant	.	protein_coding	-1
300849	T	A	Prupe.3G004900-Prupe.3G005000	MODIFIER	intergenic_region	.	.	-1
301002	A	G	Prupe.3G004800	MODIFIER	upstream_gene_variant	.	protein_coding	-1
301002	A	G	Prupe.3G004900	MODIFIER	upstream_gene_variant	.	protein_coding	-1
301002	A	G	Prupe.3G005000	MODIFIER	downstream_gene_variant	.	protein_coding	-1
301002	A	G	Prupe.3G004900-Prupe.3G005000	MODIFIER	intergenic_region	.	.	-1
334818	G	A	Prupe.3G005600	LOW	synonymous_variant	p.Val95Val	protein_coding	3
354746	G	A	Prupe.3G005900	LOW	synonymous_variant	p.Asp425Asp	protein_coding	6
354746	G	A	Prupe.3G006000	MODIFIER	downstream_gene_variant	.	protein_coding	-1
382799	A	C	Prupe.3G006300	MODERATE	missense_variant	p.Gln99His	protein_coding	2
382799	A	C	Prupe.3G006400	MODIFIER	upstream_gene_variant	.	protein_coding	-1
383069	C	T	Prupe.3G006300	LOW	synonymous_variant	p.Val149Val	protein_coding	3
383069	C	T	Prupe.3G006400	MODIFIER	upstream_gene_variant	.	protein_coding	-1
404172	C	A	Prupe.3G006600	MODIFIER	downstream_gene_variant	.	protein_coding	-1
404172	C	A	Prupe.3G006700	MODIFIER	intron_variant	.	protein_coding	2
425753	C	T	Prupe.3G007100	MODERATE	missense_variant	p.Pro260Ser	protein_coding	2
425753	C	T	Prupe.3G007100	MODERATE	missense_variant	p.Pro106Ser	protein_coding	2
425753	C	T	Prupe.3G007000	MODIFIER	upstream_gene_variant	.	protein_coding	-1
425896	T	G	Prupe.3G007000	MODIFIER	upstream_gene_variant	.	protein_coding	-1
425896	T	G	Prupe.3G007100	MODIFIER	intron_variant	.	protein_coding	2
425903	C	T	Prupe.3G007000	MODIFIER	upstream_gene_variant	.	protein_coding	-1
425903	C	T	Prupe.3G007100	MODIFIER	intron_variant	.	protein_coding	2
425966	G	A	Prupe.3G007000	MODIFIER	upstream_gene_variant	.	protein_coding	-1
425966	G	A	Prupe.3G007100	MODIFIER	intron_variant	.	protein_coding	2
507271	G	A	Prupe.3G008300	MODIFIER	intron_variant	.	protein_coding	1
528003	G	T	Prupe.3G008600	MODIFIER	5_prime_UTR_variant	.	protein_coding	1
528003	G	T	Prupe.3G008500	MODIFIER	downstream_gene_variant	.	protein_coding	-1
568764	A	G	Prupe.3G009000	MODIFIER	upstream_gene_variant	.	protein_coding	-1
568764	A	G	Prupe.3G009100	MODIFIER	downstream_gene_variant	.	protein_coding	-1
568764	A	G	Prupe.3G009000-Prupe.3G009100	MODIFIER	intergenic_region	.	.	-1
568850	C	T	Prupe.3G009000	MODIFIER	upstream_gene_variant	.	protein_coding	-1
568850	C	T	Prupe.3G009100	MODIFIER	downstream_gene_variant	.	protein_coding	-1
568850	C	T	Prupe.3G009000-Prupe.3G009100	MODIFIER	intergenic_region	.	.	-1
568853	A	G	Prupe.3G009000	MODIFIER	upstream_gene_variant	.	protein_coding	-1
568853	A	G	Prupe.3G009100	MODIFIER	downstream_gene_variant	.	protein_coding	-1
568853	A	G	Prupe.3G009000-Prupe.3G009100	MODIFIER	intergenic_region	.	.	-1
678544	A	T	Prupe.3G010500	MODIFIER	upstream_gene_variant	.	protein_coding	-1
678544	A	T	Prupe.3G010800	MODIFIER	upstream_gene_variant	.	protein_coding	-1
678544	A	T	Prupe.3G010700	MODIFIER	downstream_gene_variant	.	protein_coding	-1
678544	A	T	Prupe.3G010600	MODIFIER	downstream_gene_variant	.	protein_coding	-1
678544	A	T	Prupe.3G010600	MODIFIER	intron_variant	.	protein_coding	8
678544	A	T	Prupe.3G010600	MODIFIER	intron_variant	.	protein_coding	9
678545	T	A	Prupe.3G010500	MODIFIER	upstream_gene_variant	.	protein_coding	-1
678545	T	A	Prupe.3G010800	MODIFIER	upstream_gene_variant	.	protein_coding	-1
678545	T	A	Prupe.3G010700	MODIFIER	downstream_gene_variant	.	protein_coding	-1
678545	T	A	Prupe.3G010600	MODIFIER	downstream_gene_variant	.	protein_coding	-1
678545	T	A	Prupe.3G010600	MODIFIER	intron_variant	.	protein_coding	8
678545	T	A	Prupe.3G010600	MODIFIER	intron_variant	.	protein_coding	9
678550	T	A	Prupe.3G010500	MODIFIER	upstream_gene_variant	.	protein_coding	-1
678550	T	A	Prupe.3G010800	MODIFIER	upstream_gene_variant	.	protein_coding	-1
678550	T	A	Prupe.3G010700	MODIFIER	downstream_gene_variant	.	protein_coding	-1
678550	T	A	Prupe.3G010600	MODIFIER	downstream_gene_variant	.	protein_coding	-1
678550	T	A	Prupe.3G010600	MODIFIER	intron_variant	.	protein_coding	8
678550	T	A	Prupe.3G010600	MODIFIER	intron_variant	.	protein_coding	9
678551	A	T	Prupe.3G010500	MODIFIER	upstream_gene_variant	.	protein_coding	-1
678551	A	T	Prupe.3G010800	MODIFIER	upstream_gene_variant	.	protein_coding	-1
678551	A	T	Prupe.3G010700	MODIFIER	downstream_gene_variant	.	protein_coding	-1
678551	A	T	Prupe.3G010600	MODIFIER	downstream_gene_variant	.	protein_coding	-1
678551	A	T	Prupe.3G010600	MODIFIER	intron_variant	.	protein_coding	8
678551	A	T	Prupe.3G010600	MODIFIER	intron_variant	.	protein_coding	9
678555	T	A	Prupe.3G010500	MODIFIER	upstream_gene_variant	.	protein_coding	-1
678555	T	A	Prupe.3G010800	MODIFIER	upstream_gene_variant	.	protein_coding	-1
678555	T	A	Prupe.3G010700	MODIFIER	downstream_gene_variant	.	protein_coding	-1
678555	T	A	Prupe.3G010600	MODIFIER	downstream_gene_variant	.	protein_coding	-1
678555	T	A	Prupe.3G010600	MODIFIER	intron_variant	.	protein_coding	8
678555	T	A	Prupe.3G010600	MODIFIER	intron_variant	.	protein_coding	9
678566	T	C	Prupe.3G010500	MODIFIER	upstream_gene_variant	.	protein_coding	-1
678566	T	C	Prupe.3G010800	MODIFIER	upstream_gene_variant	.	protein_coding	-1
678566	T	C	Prupe.3G010700	MODIFIER	downstream_gene_variant	.	protein_coding	-1
678566	T	C	Prupe.3G010600	MODIFIER	downstream_gene_variant	.	protein_coding	-1
678566	T	C	Prupe.3G010600	MODIFIER	intron_variant	.	protein_coding	8
678566	T	C	Prupe.3G010600	MODIFIER	intron_variant	.	protein_coding	9
678846	G	A	Prupe.3G010600	LOW	splice_region_variant&intron_variant	.	protein_coding	9
678846	G	A	Prupe.3G010600	LOW	splice_region_variant&intron_variant	.	protein_coding	10
678846	G	A	Prupe.3G010700	MODIFIER	3_prime_UTR_variant	.	protein_coding	3
678846	G	A	Prupe.3G010700	MODIFIER	3_prime_UTR_variant	.	protein_coding	4
678846	G	A	Prupe.3G010500	MODIFIER	upstream_gene_variant	.	protein_coding	-1
678846	G	A	Prupe.3G010800	MODIFIER	upstream_gene_variant	.	protein_coding	-1
678846	G	A	Prupe.3G010600	MODIFIER	downstream_gene_variant	.	protein_coding	-1
678846	G	A	Prupe.3G010700	MODIFIER	downstream_gene_variant	.	protein_coding	-1
687932	A	G	Prupe.3G010900	LOW	synonymous_variant	p.Pro466Pro	protein_coding	2
687932	A	G	Prupe.3G011000	MODIFIER	upstream_gene_variant	.	protein_coding	-1
687932	A	G	Prupe.3G010800	MODIFIER	downstream_gene_variant	.	protein_coding	-1
687962	T	A	Prupe.3G010900	MODERATE	missense_variant	p.Gln456His	protein_coding	2
687962	T	A	Prupe.3G011000	MODIFIER	upstream_gene_variant	.	protein_coding	-1
687962	T	A	Prupe.3G010800	MODIFIER	downstream_gene_variant	.	protein_coding	-1
688342	A	C	Prupe.3G010900	MODERATE	missense_variant	p.Ser330Ala	protein_coding	2
688342	A	C	Prupe.3G011000	MODIFIER	upstream_gene_variant	.	protein_coding	-1
688342	A	C	Prupe.3G010800	MODIFIER	downstream_gene_variant	.	protein_coding	-1
694910	T	C	Prupe.3G011000	LOW	synonymous_variant	p.Leu331Leu	protein_coding	5
694910	T	C	Prupe.3G011000	LOW	synonymous_variant	p.Leu319Leu	protein_coding	4
694910	T	C	Prupe.3G011000	LOW	synonymous_variant	p.Leu303Leu	protein_coding	4
694936	G	A	Prupe.3G011000	MODERATE	missense_variant	p.Arg340Gln	protein_coding	5
694936	G	A	Prupe.3G011000	MODERATE	missense_variant	p.Arg328Gln	protein_coding	4
694936	G	A	Prupe.3G011000	MODERATE	missense_variant	p.Arg312Gln	protein_coding	4
694996	C	T	Prupe.3G011000	MODIFIER	intron_variant	.	protein_coding	5
694996	C	T	Prupe.3G011000	MODIFIER	intron_variant	.	protein_coding	4
695232	A	C	Prupe.3G011000	MODIFIER	intron_variant	.	protein_coding	5
695232	A	C	Prupe.3G011000	MODIFIER	intron_variant	.	protein_coding	4
748605	G	A	Prupe.3G012100	MODERATE	missense_variant	p.Gly14Glu	protein_coding	1
748605	G	A	Prupe.3G012000	MODIFIER	downstream_gene_variant	.	protein_coding	-1
748605	G	A	Prupe.3G012200	MODIFIER	downstream_gene_variant	.	protein_coding	-1
748624	G	T	Prupe.3G012100	MODERATE	missense_variant	p.Leu20Phe	protein_coding	1
748624	G	T	Prupe.3G012000	MODIFIER	downstream_gene_variant	.	protein_coding	-1
748624	G	T	Prupe.3G012200	MODIFIER	downstream_gene_variant	.	protein_coding	-1
754071	C	T	Prupe.3G012200	LOW	synonymous_variant	p.Lys299Lys	protein_coding	3
754071	C	T	Prupe.3G012100	MODIFIER	downstream_gene_variant	.	protein_coding	-1
754071	C	T	Prupe.3G012300	MODIFIER	downstream_gene_variant	.	protein_coding	-1
754077	T	G	Prupe.3G012200	LOW	synonymous_variant	p.Ala297Ala	protein_coding	3
754077	T	G	Prupe.3G012100	MODIFIER	downstream_gene_variant	.	protein_coding	-1
754077	T	G	Prupe.3G012300	MODIFIER	downstream_gene_variant	.	protein_coding	-1
754089	T	G	Prupe.3G012200	LOW	synonymous_variant	p.Pro293Pro	protein_coding	3
754089	T	G	Prupe.3G012100	MODIFIER	downstream_gene_variant	.	protein_coding	-1
754089	T	G	Prupe.3G012300	MODIFIER	downstream_gene_variant	.	protein_coding	-1
759340	C	T	Prupe.3G012300	LOW	synonymous_variant	p.Val236Val	protein_coding	3
759340	C	T	Prupe.3G012200	MODIFIER	upstream_gene_variant	.	protein_coding	-1
760232	A	G	Prupe.3G012300	LOW	synonymous_variant	p.Ile58Ile	protein_coding	1
760232	A	G	Prupe.3G012200	MODIFIER	upstream_gene_variant	.	protein_coding	-1
760244	T	A	Prupe.3G012300	LOW	synonymous_variant	p.Thr54Thr	protein_coding	1
760244	T	A	Prupe.3G012200	MODIFIER	upstream_gene_variant	.	protein_coding	-1
790504	T	C	Prupe.3G012400	MODERATE	missense_variant&splice_region_variant	p.Asn213Asp	protein_coding	3
790504	T	C	Prupe.3G012500	MODIFIER	upstream_gene_variant	.	protein_coding	-1
790829	G	T	Prupe.3G012400	LOW	synonymous_variant	p.Thr145Thr	protein_coding	2
790829	G	T	Prupe.3G012500	MODIFIER	upstream_gene_variant	.	protein_coding	-1
864958	C	T	Prupe.3G012800	LOW	synonymous_variant	p.Lys299Lys	protein_coding	3
864958	C	T	Prupe.3G012800	LOW	synonymous_variant	p.Lys250Lys	protein_coding	2
864958	C	T	Prupe.3G012700	MODIFIER	downstream_gene_variant	.	protein_coding	-1
864964	T	G	Prupe.3G012800	LOW	synonymous_variant	p.Ala297Ala	protein_coding	3
864964	T	G	Prupe.3G012800	LOW	synonymous_variant	p.Ala248Ala	protein_coding	2
864964	T	G	Prupe.3G012700	MODIFIER	downstream_gene_variant	.	protein_coding	-1
864976	T	G	Prupe.3G012800	LOW	synonymous_variant	p.Pro293Pro	protein_coding	3
864976	T	G	Prupe.3G012800	LOW	synonymous_variant	p.Pro244Pro	protein_coding	2
864976	T	G	Prupe.3G012700	MODIFIER	downstream_gene_variant	.	protein_coding	-1
865218	T	C	Prupe.3G012800	MODERATE	missense_variant&splice_region_variant	p.Asn213Asp	protein_coding	3
865218	T	C	Prupe.3G012800	MODERATE	missense_variant&splice_region_variant	p.Asn164Asp	protein_coding	2
865218	T	C	Prupe.3G012700	MODIFIER	downstream_gene_variant	.	protein_coding	-1
865543	G	T	Prupe.3G012800	LOW	synonymous_variant	p.Thr145Thr	protein_coding	2
865543	G	T	Prupe.3G012800	LOW	synonymous_variant	p.Thr96Thr	protein_coding	1
865543	G	T	Prupe.3G012700	MODIFIER	downstream_gene_variant	.	protein_coding	-1
1041472	C	A	Prupe.3G014600	MODIFIER	upstream_gene_variant	.	protein_coding	-1
1041472	C	A	Prupe.3G014600	MODIFIER	intron_variant	.	protein_coding	5
1041472	C	A	Prupe.3G014600	MODIFIER	intron_variant	.	protein_coding	4
1041510	G	A	Prupe.3G014600	MODIFIER	upstream_gene_variant	.	protein_coding	-1
1041510	G	A	Prupe.3G014600	MODIFIER	intron_variant	.	protein_coding	5
1041510	G	A	Prupe.3G014600	MODIFIER	intron_variant	.	protein_coding	4
1089121	C	A	Prupe.3G015300	MODERATE	missense_variant	p.Arg382Leu	protein_coding	6
1089121	C	A	Prupe.3G015400	MODIFIER	downstream_gene_variant	.	protein_coding	-1
1089122	G	T	Prupe.3G015300	LOW	synonymous_variant	p.Arg382Arg	protein_coding	6
1089122	G	T	Prupe.3G015400	MODIFIER	downstream_gene_variant	.	protein_coding	-1
1106156	T	A	Prupe.3G015400	MODIFIER	upstream_gene_variant	.	protein_coding	-1
1106156	T	A	Prupe.3G015500	MODIFIER	intron_variant	.	protein_coding	2
1181010	T	C	Prupe.3G016400	MODIFIER	upstream_gene_variant	.	protein_coding	-1
1181010	T	C	Prupe.3G016600	MODIFIER	upstream_gene_variant	.	protein_coding	-1
1181010	T	C	Prupe.3G016500	MODIFIER	downstream_gene_variant	.	protein_coding	-1
1181010	T	C	Prupe.3G016500-Prupe.3G016600	MODIFIER	intergenic_region	.	.	-1
1181122	G	A	Prupe.3G016400	MODIFIER	upstream_gene_variant	.	protein_coding	-1
1181122	G	A	Prupe.3G016600	MODIFIER	upstream_gene_variant	.	protein_coding	-1
1181122	G	A	Prupe.3G016500	MODIFIER	downstream_gene_variant	.	protein_coding	-1
1181122	G	A	Prupe.3G016500-Prupe.3G016600	MODIFIER	intergenic_region	.	.	-1
1181159	T	C	Prupe.3G016400	MODIFIER	upstream_gene_variant	.	protein_coding	-1
1181159	T	C	Prupe.3G016600	MODIFIER	upstream_gene_variant	.	protein_coding	-1
1181159	T	C	Prupe.3G016500	MODIFIER	downstream_gene_variant	.	protein_coding	-1
1181159	T	C	Prupe.3G016500-Prupe.3G016600	MODIFIER	intergenic_region	.	.	-1
1181165	C	T	Prupe.3G016400	MODIFIER	upstream_gene_variant	.	protein_coding	-1
1181165	C	T	Prupe.3G016600	MODIFIER	upstream_gene_variant	.	protein_coding	-1
1181165	C	T	Prupe.3G016500	MODIFIER	downstream_gene_variant	.	protein_coding	-1
1181165	C	T	Prupe.3G016500-Prupe.3G016600	MODIFIER	intergenic_region	.	.	-1
1181191	A	C	Prupe.3G016400	MODIFIER	upstream_gene_variant	.	protein_coding	-1
1181191	A	C	Prupe.3G016600	MODIFIER	upstream_gene_variant	.	protein_coding	-1
1181191	A	C	Prupe.3G016500	MODIFIER	downstream_gene_variant	.	protein_coding	-1
1181191	A	C	Prupe.3G016500-Prupe.3G016600	MODIFIER	intergenic_region	.	.	-1
1181192	T	C	Prupe.3G016400	MODIFIER	upstream_gene_variant	.	protein_coding	-1
1181192	T	C	Prupe.3G016600	MODIFIER	upstream_gene_variant	.	protein_coding	-1
1181192	T	C	Prupe.3G016500	MODIFIER	downstream_gene_variant	.	protein_coding	-1
1181192	T	C	Prupe.3G016500-Prupe.3G016600	MODIFIER	intergenic_region	.	.	-1
1181198	T	C	Prupe.3G016400	MODIFIER	upstream_gene_variant	.	protein_coding	-1
1181198	T	C	Prupe.3G016600	MODIFIER	upstream_gene_variant	.	protein_coding	-1
1181198	T	C	Prupe.3G016500	MODIFIER	downstream_gene_variant	.	protein_coding	-1
1181198	T	C	Prupe.3G016500-Prupe.3G016600	MODIFIER	intergenic_region	.	.	-1
1181204	T	C	Prupe.3G016400	MODIFIER	upstream_gene_variant	.	protein_coding	-1
1181204	T	C	Prupe.3G016600	MODIFIER	upstream_gene_variant	.	protein_coding	-1
1181204	T	C	Prupe.3G016500	MODIFIER	downstream_gene_variant	.	protein_coding	-1
1181204	T	C	Prupe.3G016500-Prupe.3G016600	MODIFIER	intergenic_region	.	.	-1
1181211	C	T	Prupe.3G016400	MODIFIER	upstream_gene_variant	.	protein_coding	-1
1181211	C	T	Prupe.3G016600	MODIFIER	upstream_gene_variant	.	protein_coding	-1
1181211	C	T	Prupe.3G016500	MODIFIER	downstream_gene_variant	.	protein_coding	-1
1181211	C	T	Prupe.3G016500-Prupe.3G016600	MODIFIER	intergenic_region	.	.	-1
1205803	C	T	Prupe.3G016900	LOW	synonymous_variant	p.Gln88Gln	protein_coding	2
1205803	C	T	Prupe.3G016800	MODIFIER	upstream_gene_variant	.	protein_coding	-1
1242525	G	A	Prupe.3G017300	MODIFIER	5_prime_UTR_variant	.	protein_coding	1
1242525	G	A	Prupe.3G017400	MODIFIER	downstream_gene_variant	.	protein_coding	-1
1242557	G	A	Prupe.3G017300	MODIFIER	5_prime_UTR_variant	.	protein_coding	1
1242557	G	A	Prupe.3G017400	MODIFIER	downstream_gene_variant	.	protein_coding	-1
1260137	A	G	Prupe.3G017700	LOW	synonymous_variant	p.Ile1010Ile	protein_coding	12
1260137	A	G	Prupe.3G017700	LOW	synonymous_variant	p.Ile1009Ile	protein_coding	12
1260155	A	G	Prupe.3G017700	LOW	synonymous_variant	p.Ala1004Ala	protein_coding	12
1260155	A	G	Prupe.3G017700	LOW	synonymous_variant	p.Ala1003Ala	protein_coding	12
1321305	C	A	Prupe.3G018500	MODIFIER	downstream_gene_variant	.	protein_coding	-1
1321305	C	A	Prupe.3G018600	MODIFIER	intron_variant	.	protein_coding	10
1328942	T	C	Prupe.3G018700	MODERATE	missense_variant	p.Lys195Arg	protein_coding	7
1328942	T	C	Prupe.3G018600	MODIFIER	upstream_gene_variant	.	protein_coding	-1
1328942	T	C	Prupe.3G018800	MODIFIER	upstream_gene_variant	.	protein_coding	-1
1328942	T	C	Prupe.3G018900	MODIFIER	downstream_gene_variant	.	protein_coding	-1
1328958	C	T	Prupe.3G018700	MODERATE	missense_variant	p.Glu190Lys	protein_coding	7
1328958	C	T	Prupe.3G018600	MODIFIER	upstream_gene_variant	.	protein_coding	-1
1328958	C	T	Prupe.3G018800	MODIFIER	upstream_gene_variant	.	protein_coding	-1
1328958	C	T	Prupe.3G018900	MODIFIER	downstream_gene_variant	.	protein_coding	-1
1329162	A	G	Prupe.3G018700	HIGH	splice_donor_variant&intron_variant	.	protein_coding	6
1329162	A	G	Prupe.3G018600	MODIFIER	upstream_gene_variant	.	protein_coding	-1
1329162	A	G	Prupe.3G018800	MODIFIER	upstream_gene_variant	.	protein_coding	-1
1329162	A	G	Prupe.3G018900	MODIFIER	downstream_gene_variant	.	protein_coding	-1
1329186	T	C	Prupe.3G018700	MODERATE	missense_variant	p.His158Arg	protein_coding	6
1329186	T	C	Prupe.3G018600	MODIFIER	upstream_gene_variant	.	protein_coding	-1
1329186	T	C	Prupe.3G018800	MODIFIER	upstream_gene_variant	.	protein_coding	-1
1329186	T	C	Prupe.3G018900	MODIFIER	downstream_gene_variant	.	protein_coding	-1
1356371	T	C	Prupe.3G019000	MODIFIER	upstream_gene_variant	.	protein_coding	-1
1356371	T	C	Prupe.3G018900-Prupe.3G019000	MODIFIER	intergenic_region	.	.	-1
1356608	T	C	Prupe.3G019000	MODIFIER	upstream_gene_variant	.	protein_coding	-1
1356608	T	C	Prupe.3G018900-Prupe.3G019000	MODIFIER	intergenic_region	.	.	-1
1356707	A	G	Prupe.3G019000	MODIFIER	upstream_gene_variant	.	protein_coding	-1
1356707	A	G	Prupe.3G018900-Prupe.3G019000	MODIFIER	intergenic_region	.	.	-1
1356745	C	A	Prupe.3G019000	MODIFIER	upstream_gene_variant	.	protein_coding	-1
1356745	C	A	Prupe.3G018900-Prupe.3G019000	MODIFIER	intergenic_region	.	.	-1
1356763	T	C	Prupe.3G019000	MODIFIER	upstream_gene_variant	.	protein_coding	-1
1356763	T	C	Prupe.3G018900-Prupe.3G019000	MODIFIER	intergenic_region	.	.	-1
1363842	C	T	Prupe.3G019000	MODIFIER	downstream_gene_variant	.	protein_coding	-1
1363842	C	T	Prupe.3G019100	MODIFIER	downstream_gene_variant	.	protein_coding	-1
1363842	C	T	Prupe.3G019000-Prupe.3G019100	MODIFIER	intergenic_region	.	.	-1
1374059	T	G	Prupe.3G019200	LOW	synonymous_variant	p.Pro34Pro	protein_coding	1
1374102	G	C	Prupe.3G019200	MODERATE	missense_variant	p.Ser20Trp	protein_coding	1
1374134	G	A	Prupe.3G019200	LOW	synonymous_variant	p.Leu9Leu	protein_coding	1
1466537	T	C	Prupe.3G020000	LOW	synonymous_variant	p.Glu241Glu	protein_coding	2
1466537	T	C	Prupe.3G019900	MODIFIER	downstream_gene_variant	.	protein_coding	-1
1466537	T	C	Prupe.3G019800	MODIFIER	downstream_gene_variant	.	protein_coding	-1
1477269	T	G	Prupe.3G020200	MODERATE	missense_variant	p.Asn305Thr	protein_coding	4
1477269	T	G	Prupe.3G020100	MODIFIER	downstream_gene_variant	.	protein_coding	-1
1477280	C	T	Prupe.3G020200	LOW	synonymous_variant	p.Val301Val	protein_coding	4
1477280	C	T	Prupe.3G020100	MODIFIER	downstream_gene_variant	.	protein_coding	-1
1496032	C	T	Prupe.3G020500	MODIFIER	5_prime_UTR_variant	.	protein_coding	1
1503650	C	T	Prupe.3G020500	MODIFIER	downstream_gene_variant	.	protein_coding	-1
1503650	C	T	Prupe.3G020700	MODIFIER	downstream_gene_variant	.	protein_coding	-1
1503650	C	T	Prupe.3G020600	MODIFIER	intron_variant	.	protein_coding	1
1503693	T	C	Prupe.3G020500	MODIFIER	downstream_gene_variant	.	protein_coding	-1
1503693	T	C	Prupe.3G020700	MODIFIER	downstream_gene_variant	.	protein_coding	-1
1503693	T	C	Prupe.3G020600	MODIFIER	intron_variant	.	protein_coding	1
1503804	T	C	Prupe.3G020500	MODIFIER	downstream_gene_variant	.	protein_coding	-1
1503804	T	C	Prupe.3G020700	MODIFIER	downstream_gene_variant	.	protein_coding	-1
1503804	T	C	Prupe.3G020600	MODIFIER	intron_variant	.	protein_coding	1
1503880	T	A	Prupe.3G020500	MODIFIER	downstream_gene_variant	.	protein_coding	-1
1503880	T	A	Prupe.3G020700	MODIFIER	downstream_gene_variant	.	protein_coding	-1
1503880	T	A	Prupe.3G020600	MODIFIER	intron_variant	.	protein_coding	1
1517332	A	G	Prupe.3G020800	LOW	synonymous_variant	p.Gly109Gly	protein_coding	2
1517332	A	G	Prupe.3G020700	MODIFIER	upstream_gene_variant	.	protein_coding	-1
1517332	A	G	Prupe.3G020900	MODIFIER	downstream_gene_variant	.	protein_coding	-1
1517344	T	G	Prupe.3G020800	LOW	synonymous_variant	p.Gly105Gly	protein_coding	2
1517344	T	G	Prupe.3G020700	MODIFIER	upstream_gene_variant	.	protein_coding	-1
1517344	T	G	Prupe.3G020900	MODIFIER	downstream_gene_variant	.	protein_coding	-1
1524547	G	A	Prupe.3G020900	MODERATE	missense_variant	p.Ala151Val	protein_coding	2
1524547	G	A	Prupe.3G020900	MODERATE	missense_variant	p.Ala151Val	protein_coding	3
1524702	T	A	Prupe.3G020900	LOW	synonymous_variant	p.Thr99Thr	protein_coding	2
1524702	T	A	Prupe.3G020900	LOW	synonymous_variant	p.Thr99Thr	protein_coding	3
1676491	A	G	Prupe.3G022500	MODIFIER	upstream_gene_variant	.	protein_coding	-1
1676491	A	G	Prupe.3G022600	MODIFIER	downstream_gene_variant	.	protein_coding	-1
1676491	A	G	Prupe.3G022700	MODIFIER	intron_variant	.	protein_coding	18
1713877	T	C	Prupe.3G023300	MODIFIER	upstream_gene_variant	.	protein_coding	-1
1713877	T	C	Prupe.3G023100	MODIFIER	downstream_gene_variant	.	protein_coding	-1
1713877	T	C	Prupe.3G023200	MODIFIER	intron_variant	.	protein_coding	1
1741355	T	C	Prupe.3G023600	MODERATE	missense_variant	p.Lys312Arg	protein_coding	1
1741355	T	C	Prupe.3G023500	MODIFIER	upstream_gene_variant	.	protein_coding	-1
1741355	T	C	Prupe.3G023400	MODIFIER	downstream_gene_variant	.	protein_coding	-1
1741355	T	C	Prupe.3G023700	MODIFIER	downstream_gene_variant	.	protein_coding	-1
1741396	G	A	Prupe.3G023600	LOW	synonymous_variant	p.Asn298Asn	protein_coding	1
1741396	G	A	Prupe.3G023500	MODIFIER	upstream_gene_variant	.	protein_coding	-1
1741396	G	A	Prupe.3G023400	MODIFIER	downstream_gene_variant	.	protein_coding	-1
1741396	G	A	Prupe.3G023700	MODIFIER	downstream_gene_variant	.	protein_coding	-1
1825762	G	A	Prupe.3G024900	LOW	synonymous_variant	p.Ser5Ser	protein_coding	1
1825762	G	A	Prupe.3G025000	MODIFIER	upstream_gene_variant	.	protein_coding	-1
1830689	C	A	Prupe.3G025000	MODERATE	missense_variant	p.Ala71Asp	protein_coding	2
1830689	C	A	Prupe.3G024900	MODIFIER	downstream_gene_variant	.	protein_coding	-1
1830689	C	A	Prupe.3G025100	MODIFIER	downstream_gene_variant	.	protein_coding	-1
1830690	C	T	Prupe.3G025000	LOW	synonymous_variant	p.Ala71Ala	protein_coding	2
1830690	C	T	Prupe.3G024900	MODIFIER	downstream_gene_variant	.	protein_coding	-1
1830690	C	T	Prupe.3G025100	MODIFIER	downstream_gene_variant	.	protein_coding	-1
1830701	C	G	Prupe.3G025000	MODERATE	missense_variant	p.Ala75Gly	protein_coding	2
1830701	C	G	Prupe.3G024900	MODIFIER	downstream_gene_variant	.	protein_coding	-1
1830701	C	G	Prupe.3G025100	MODIFIER	downstream_gene_variant	.	protein_coding	-1
1830730	G	C	Prupe.3G025000	MODERATE	missense_variant	p.Gly85Arg	protein_coding	2
1830730	G	C	Prupe.3G024900	MODIFIER	downstream_gene_variant	.	protein_coding	-1
1830730	G	C	Prupe.3G025100	MODIFIER	downstream_gene_variant	.	protein_coding	-1
1830747	C	A	Prupe.3G025000	MODERATE	missense_variant	p.Ser90Arg	protein_coding	2
1830747	C	A	Prupe.3G024900	MODIFIER	downstream_gene_variant	.	protein_coding	-1
1830747	C	A	Prupe.3G025100	MODIFIER	downstream_gene_variant	.	protein_coding	-1
1834010	T	A	Prupe.3G025000	MODIFIER	downstream_gene_variant	.	protein_coding	-1
1834010	T	A	Prupe.3G025200	MODIFIER	downstream_gene_variant	.	protein_coding	-1
1834010	T	A	Prupe.3G025100	MODIFIER	intron_variant	.	protein_coding	2
1834292	T	A	Prupe.3G025000	MODIFIER	downstream_gene_variant	.	protein_coding	-1
1834292	T	A	Prupe.3G025200	MODIFIER	downstream_gene_variant	.	protein_coding	-1
1834292	T	A	Prupe.3G025100	MODIFIER	intron_variant	.	protein_coding	2
1834293	G	T	Prupe.3G025000	MODIFIER	downstream_gene_variant	.	protein_coding	-1
1834293	G	T	Prupe.3G025200	MODIFIER	downstream_gene_variant	.	protein_coding	-1
1834293	G	T	Prupe.3G025100	MODIFIER	intron_variant	.	protein_coding	2
1834297	T	C	Prupe.3G025000	MODIFIER	downstream_gene_variant	.	protein_coding	-1
1834297	T	C	Prupe.3G025200	MODIFIER	downstream_gene_variant	.	protein_coding	-1
1834297	T	C	Prupe.3G025100	MODIFIER	intron_variant	.	protein_coding	2
1834311	A	C	Prupe.3G025000	MODIFIER	downstream_gene_variant	.	protein_coding	-1
1834311	A	C	Prupe.3G025200	MODIFIER	downstream_gene_variant	.	protein_coding	-1
1834311	A	C	Prupe.3G025100	MODIFIER	intron_variant	.	protein_coding	2
1834329	A	C	Prupe.3G025000	MODIFIER	downstream_gene_variant	.	protein_coding	-1
1834329	A	C	Prupe.3G025200	MODIFIER	downstream_gene_variant	.	protein_coding	-1
1834329	A	C	Prupe.3G025100	MODIFIER	intron_variant	.	protein_coding	2
1834343	A	G	Prupe.3G025000	MODIFIER	downstream_gene_variant	.	protein_coding	-1
1834343	A	G	Prupe.3G025200	MODIFIER	downstream_gene_variant	.	protein_coding	-1
1834343	A	G	Prupe.3G025100	MODIFIER	intron_variant	.	protein_coding	2
1834349	T	C	Prupe.3G025000	MODIFIER	downstream_gene_variant	.	protein_coding	-1
1834349	T	C	Prupe.3G025200	MODIFIER	downstream_gene_variant	.	protein_coding	-1
1834349	T	C	Prupe.3G025100	MODIFIER	intron_variant	.	protein_coding	2
1842594	A	G	Prupe.3G025300	LOW	synonymous_variant	p.Leu234Leu	protein_coding	3
1842594	A	G	Prupe.3G025200	MODIFIER	upstream_gene_variant	.	protein_coding	-1
1842595	C	T	Prupe.3G025300	LOW	synonymous_variant	p.Gly233Gly	protein_coding	3
1842595	C	T	Prupe.3G025200	MODIFIER	upstream_gene_variant	.	protein_coding	-1
1842605	T	C	Prupe.3G025300	MODERATE	missense_variant	p.Gln230Arg	protein_coding	3
1842605	T	C	Prupe.3G025200	MODIFIER	upstream_gene_variant	.	protein_coding	-1
1903484	G	A	Prupe.3G025900	LOW	synonymous_variant	p.Leu647Leu	protein_coding	11
1903484	G	A	Prupe.3G025800	MODIFIER	downstream_gene_variant	.	protein_coding	-1
1935893	G	T	Prupe.3G026300	MODIFIER	upstream_gene_variant	.	protein_coding	-1
1935893	G	T	Prupe.3G026400	MODIFIER	downstream_gene_variant	.	protein_coding	-1
1935893	G	T	Prupe.3G026200-Prupe.3G026300	MODIFIER	intergenic_region	.	.	-1
1935894	C	T	Prupe.3G026300	MODIFIER	upstream_gene_variant	.	protein_coding	-1
1935894	C	T	Prupe.3G026400	MODIFIER	downstream_gene_variant	.	protein_coding	-1
1935894	C	T	Prupe.3G026200-Prupe.3G026300	MODIFIER	intergenic_region	.	.	-1
1935926	A	C	Prupe.3G026300	MODIFIER	upstream_gene_variant	.	protein_coding	-1
1935926	A	C	Prupe.3G026400	MODIFIER	downstream_gene_variant	.	protein_coding	-1
1935926	A	C	Prupe.3G026200-Prupe.3G026300	MODIFIER	intergenic_region	.	.	-1
1936026	T	A	Prupe.3G026300	MODIFIER	5_prime_UTR_variant	.	protein_coding	1
1936026	T	A	Prupe.3G026400	MODIFIER	downstream_gene_variant	.	protein_coding	-1
1987957	C	T	Prupe.3G026800	MODIFIER	5_prime_UTR_variant	.	protein_coding	1
1987957	C	T	Prupe.3G026900	MODIFIER	downstream_gene_variant	.	protein_coding	-1
1995412	C	T	Prupe.3G026900	MODERATE	missense_variant	p.Gly259Glu	protein_coding	10
1995412	C	T	Prupe.3G027000	MODIFIER	downstream_gene_variant	.	protein_coding	-1
1995412	C	T	Prupe.3G026900	MODIFIER	intron_variant	.	protein_coding	1
1995686	C	T	Prupe.3G027000	MODIFIER	downstream_gene_variant	.	protein_coding	-1
1995686	C	T	Prupe.3G026900	MODIFIER	intron_variant	.	protein_coding	8
1995686	C	T	Prupe.3G026900	MODIFIER	intron_variant	.	protein_coding	1
1995728	T	G	Prupe.3G026900	LOW	splice_region_variant&intron_variant	.	protein_coding	8
1995728	T	G	Prupe.3G027000	MODIFIER	downstream_gene_variant	.	protein_coding	-1
1995728	T	G	Prupe.3G026900	MODIFIER	intron_variant	.	protein_coding	1
1999904	T	C	Prupe.3G027000	MODIFIER	3_prime_UTR_variant	.	protein_coding	6
1999904	T	C	Prupe.3G026900	MODIFIER	upstream_gene_variant	.	protein_coding	-1
2000000	A	G	Prupe.3G027000	MODIFIER	3_prime_UTR_variant	.	protein_coding	6
2000000	A	G	Prupe.3G026900	MODIFIER	upstream_gene_variant	.	protein_coding	-1
2016355	T	A	Prupe.3G027100	MODIFIER	upstream_gene_variant	.	protein_coding	-1
2016355	T	A	Prupe.3G027200	MODIFIER	intron_variant	.	protein_coding	5
2016355	T	A	Prupe.3G027200	MODIFIER	intron_variant	.	protein_coding	4
2016398	C	T	Prupe.3G027100	MODIFIER	upstream_gene_variant	.	protein_coding	-1
2016398	C	T	Prupe.3G027200	MODIFIER	intron_variant	.	protein_coding	5
2016398	C	T	Prupe.3G027200	MODIFIER	intron_variant	.	protein_coding	4
2016406	C	G	Prupe.3G027100	MODIFIER	upstream_gene_variant	.	protein_coding	-1
2016406	C	G	Prupe.3G027200	MODIFIER	intron_variant	.	protein_coding	5
2016406	C	G	Prupe.3G027200	MODIFIER	intron_variant	.	protein_coding	4
2102872	T	G	Prupe.3G028200	MODIFIER	3_prime_UTR_variant	.	protein_coding	17
2102872	T	G	Prupe.3G028200	MODIFIER	3_prime_UTR_variant	.	protein_coding	16
2102872	T	G	Prupe.3G028100	MODIFIER	upstream_gene_variant	.	protein_coding	-1
2102952	C	T	Prupe.3G028200	LOW	synonymous_variant	p.Gln1729Gln	protein_coding	17
2102952	C	T	Prupe.3G028200	LOW	synonymous_variant	p.Gln1636Gln	protein_coding	16
2102952	C	T	Prupe.3G028200	LOW	synonymous_variant	p.Gln1651Gln	protein_coding	16
2102952	C	T	Prupe.3G028100	MODIFIER	upstream_gene_variant	.	protein_coding	-1
2102976	A	T	Prupe.3G028200	LOW	synonymous_variant	p.Ala1721Ala	protein_coding	17
2102976	A	T	Prupe.3G028200	LOW	synonymous_variant	p.Ala1628Ala	protein_coding	16
2102976	A	T	Prupe.3G028200	LOW	synonymous_variant	p.Ala1643Ala	protein_coding	16
2102976	A	T	Prupe.3G028100	MODIFIER	upstream_gene_variant	.	protein_coding	-1
2103169	G	A	Prupe.3G028200	LOW	synonymous_variant	p.Ser1694Ser	protein_coding	16
2103169	G	A	Prupe.3G028200	LOW	synonymous_variant	p.Ser1601Ser	protein_coding	15
2103169	G	A	Prupe.3G028200	LOW	synonymous_variant	p.Ser1616Ser	protein_coding	15
2103169	G	A	Prupe.3G028100	MODIFIER	upstream_gene_variant	.	protein_coding	-1
2105525	A	C	Prupe.3G028100	MODIFIER	upstream_gene_variant	.	protein_coding	-1
2105525	A	C	Prupe.3G028200	MODIFIER	intron_variant	.	protein_coding	11
2105525	A	C	Prupe.3G028200	MODIFIER	intron_variant	.	protein_coding	10
2105553	A	G	Prupe.3G028100	MODIFIER	upstream_gene_variant	.	protein_coding	-1
2105553	A	G	Prupe.3G028200	MODIFIER	intron_variant	.	protein_coding	11
2105553	A	G	Prupe.3G028200	MODIFIER	intron_variant	.	protein_coding	10
2108265	C	T	Prupe.3G028300	MODIFIER	upstream_gene_variant	.	protein_coding	-1
2108265	C	T	Prupe.3G028200	MODIFIER	intron_variant	.	protein_coding	6
2108265	C	T	Prupe.3G028200	MODIFIER	intron_variant	.	protein_coding	5
2108630	G	A	Prupe.3G028300	MODIFIER	upstream_gene_variant	.	protein_coding	-1
2108630	G	A	Prupe.3G028200	MODIFIER	intron_variant	.	protein_coding	6
2108630	G	A	Prupe.3G028200	MODIFIER	intron_variant	.	protein_coding	5
2108637	G	A	Prupe.3G028300	MODIFIER	upstream_gene_variant	.	protein_coding	-1
2108637	G	A	Prupe.3G028200	MODIFIER	intron_variant	.	protein_coding	6
2108637	G	A	Prupe.3G028200	MODIFIER	intron_variant	.	protein_coding	5
2108784	A	G	Prupe.3G028200	MODERATE	missense_variant	p.Val927Ala	protein_coding	6
2108784	A	G	Prupe.3G028200	MODERATE	missense_variant	p.Val849Ala	protein_coding	5
2108784	A	G	Prupe.3G028300	MODIFIER	upstream_gene_variant	.	protein_coding	-1
2108981	G	A	Prupe.3G028200	LOW	synonymous_variant	p.Ser861Ser	protein_coding	6
2108981	G	A	Prupe.3G028200	LOW	synonymous_variant	p.Ser783Ser	protein_coding	5
2108981	G	A	Prupe.3G028300	MODIFIER	upstream_gene_variant	.	protein_coding	-1
2108984	T	C	Prupe.3G028200	LOW	synonymous_variant	p.Lys860Lys	protein_coding	6
2108984	T	C	Prupe.3G028200	LOW	synonymous_variant	p.Lys782Lys	protein_coding	5
2108984	T	C	Prupe.3G028300	MODIFIER	upstream_gene_variant	.	protein_coding	-1
2109020	G	C	Prupe.3G028200	MODERATE	missense_variant	p.His848Gln	protein_coding	6
2109020	G	C	Prupe.3G028200	MODERATE	missense_variant	p.His770Gln	protein_coding	5
2109020	G	C	Prupe.3G028300	MODIFIER	upstream_gene_variant	.	protein_coding	-1
2109038	A	G	Prupe.3G028200	LOW	synonymous_variant	p.Ser842Ser	protein_coding	6
2109038	A	G	Prupe.3G028200	LOW	synonymous_variant	p.Ser764Ser	protein_coding	5
2109038	A	G	Prupe.3G028300	MODIFIER	upstream_gene_variant	.	protein_coding	-1
2109971	G	A	Prupe.3G028200	LOW	synonymous_variant	p.Asn531Asn	protein_coding	6
2109971	G	A	Prupe.3G028200	LOW	synonymous_variant	p.Asn453Asn	protein_coding	5
2109971	G	A	Prupe.3G028300	MODIFIER	upstream_gene_variant	.	protein_coding	-1
2144584	A	G	Prupe.3G028500	LOW	synonymous_variant	p.Ile374Ile	protein_coding	13
2144584	A	G	Prupe.3G028600	MODIFIER	upstream_gene_variant	.	protein_coding	-1
2151075	T	C	Prupe.3G028500	LOW	splice_region_variant&intron_variant	.	protein_coding	2
2151075	T	C	Prupe.3G028700	MODIFIER	upstream_gene_variant	.	protein_coding	-1
2151075	T	C	Prupe.3G028600	MODIFIER	downstream_gene_variant	.	protein_coding	-1
2165917	T	C	Prupe.3G029000	MODIFIER	upstream_gene_variant	.	protein_coding	-1
2165917	T	C	Prupe.3G028800	MODIFIER	downstream_gene_variant	.	protein_coding	-1
2165917	T	C	Prupe.3G028900	MODIFIER	downstream_gene_variant	.	protein_coding	-1
2165917	T	C	Prupe.3G028900-Prupe.3G029000	MODIFIER	intergenic_region	.	.	-1
2165953	A	C	Prupe.3G029000	MODIFIER	upstream_gene_variant	.	protein_coding	-1
2165953	A	C	Prupe.3G028800	MODIFIER	downstream_gene_variant	.	protein_coding	-1
2165953	A	C	Prupe.3G028900	MODIFIER	downstream_gene_variant	.	protein_coding	-1
2165953	A	C	Prupe.3G028900-Prupe.3G029000	MODIFIER	intergenic_region	.	.	-1
2165970	C	T	Prupe.3G029000	MODIFIER	upstream_gene_variant	.	protein_coding	-1
2165970	C	T	Prupe.3G028800	MODIFIER	downstream_gene_variant	.	protein_coding	-1
2165970	C	T	Prupe.3G028900	MODIFIER	downstream_gene_variant	.	protein_coding	-1
2165970	C	T	Prupe.3G028900-Prupe.3G029000	MODIFIER	intergenic_region	.	.	-1
2165997	T	C	Prupe.3G029000	MODIFIER	upstream_gene_variant	.	protein_coding	-1
2165997	T	C	Prupe.3G028800	MODIFIER	downstream_gene_variant	.	protein_coding	-1
2165997	T	C	Prupe.3G028900	MODIFIER	downstream_gene_variant	.	protein_coding	-1
2165997	T	C	Prupe.3G028900-Prupe.3G029000	MODIFIER	intergenic_region	.	.	-1
2166105	T	G	Prupe.3G029000	MODIFIER	upstream_gene_variant	.	protein_coding	-1
2166105	T	G	Prupe.3G028800	MODIFIER	downstream_gene_variant	.	protein_coding	-1
2166105	T	G	Prupe.3G028900	MODIFIER	downstream_gene_variant	.	protein_coding	-1
2166105	T	G	Prupe.3G028900-Prupe.3G029000	MODIFIER	intergenic_region	.	.	-1
2166139	A	G	Prupe.3G029000	MODIFIER	upstream_gene_variant	.	protein_coding	-1
2166139	A	G	Prupe.3G028800	MODIFIER	downstream_gene_variant	.	protein_coding	-1
2166139	A	G	Prupe.3G028900	MODIFIER	downstream_gene_variant	.	protein_coding	-1
2166139	A	G	Prupe.3G028900-Prupe.3G029000	MODIFIER	intergenic_region	.	.	-1
2166148	T	G	Prupe.3G029000	MODIFIER	upstream_gene_variant	.	protein_coding	-1
2166148	T	G	Prupe.3G028800	MODIFIER	downstream_gene_variant	.	protein_coding	-1
2166148	T	G	Prupe.3G028900	MODIFIER	downstream_gene_variant	.	protein_coding	-1
2166148	T	G	Prupe.3G028900-Prupe.3G029000	MODIFIER	intergenic_region	.	.	-1
2166155	C	T	Prupe.3G029000	MODIFIER	upstream_gene_variant	.	protein_coding	-1
2166155	C	T	Prupe.3G028800	MODIFIER	downstream_gene_variant	.	protein_coding	-1
2166155	C	T	Prupe.3G028900	MODIFIER	downstream_gene_variant	.	protein_coding	-1
2166155	C	T	Prupe.3G028900-Prupe.3G029000	MODIFIER	intergenic_region	.	.	-1
2166161	C	T	Prupe.3G029000	MODIFIER	upstream_gene_variant	.	protein_coding	-1
2166161	C	T	Prupe.3G028800	MODIFIER	downstream_gene_variant	.	protein_coding	-1
2166161	C	T	Prupe.3G028900	MODIFIER	downstream_gene_variant	.	protein_coding	-1
2166161	C	T	Prupe.3G028900-Prupe.3G029000	MODIFIER	intergenic_region	.	.	-1
2166181	C	T	Prupe.3G029000	MODIFIER	upstream_gene_variant	.	protein_coding	-1
2166181	C	T	Prupe.3G028800	MODIFIER	downstream_gene_variant	.	protein_coding	-1
2166181	C	T	Prupe.3G028900	MODIFIER	downstream_gene_variant	.	protein_coding	-1
2166181	C	T	Prupe.3G028900-Prupe.3G029000	MODIFIER	intergenic_region	.	.	-1
2166221	A	G	Prupe.3G029000	MODIFIER	upstream_gene_variant	.	protein_coding	-1
2166221	A	G	Prupe.3G028800	MODIFIER	downstream_gene_variant	.	protein_coding	-1
2166221	A	G	Prupe.3G028900	MODIFIER	downstream_gene_variant	.	protein_coding	-1
2166221	A	G	Prupe.3G028900-Prupe.3G029000	MODIFIER	intergenic_region	.	.	-1
2166279	A	G	Prupe.3G029000	MODIFIER	upstream_gene_variant	.	protein_coding	-1
2166279	A	G	Prupe.3G028800	MODIFIER	downstream_gene_variant	.	protein_coding	-1
2166279	A	G	Prupe.3G028900	MODIFIER	downstream_gene_variant	.	protein_coding	-1
2166279	A	G	Prupe.3G028900-Prupe.3G029000	MODIFIER	intergenic_region	.	.	-1
2208365	C	T	Prupe.3G029500	LOW	synonymous_variant	p.Asp1035Asp	protein_coding	1
2208365	C	T	Prupe.3G029600	MODIFIER	upstream_gene_variant	.	protein_coding	-1
2208775	G	T	Prupe.3G029500	MODIFIER	3_prime_UTR_variant	.	protein_coding	1
2208775	G	T	Prupe.3G029600	MODIFIER	upstream_gene_variant	.	protein_coding	-1
2208794	C	T	Prupe.3G029500	MODIFIER	3_prime_UTR_variant	.	protein_coding	1
2208794	C	T	Prupe.3G029600	MODIFIER	upstream_gene_variant	.	protein_coding	-1
2208795	A	G	Prupe.3G029500	MODIFIER	3_prime_UTR_variant	.	protein_coding	1
2208795	A	G	Prupe.3G029600	MODIFIER	upstream_gene_variant	.	protein_coding	-1
2223605	A	G	Prupe.3G029800	MODIFIER	intron_variant	.	protein_coding	9
2223605	A	G	Prupe.3G029800	MODIFIER	intron_variant	.	protein_coding	8
2223890	T	C	Prupe.3G029800	LOW	splice_region_variant&intron_variant	.	protein_coding	10
2223890	T	C	Prupe.3G029800	LOW	splice_region_variant&intron_variant	.	protein_coding	9
2238120	G	T	Prupe.3G029900	MODIFIER	5_prime_UTR_variant	.	protein_coding	1
2238145	C	T	Prupe.3G029900	MODIFIER	5_prime_UTR_variant	.	protein_coding	1
2278825	C	G	Prupe.3G030500	MODIFIER	downstream_gene_variant	.	protein_coding	-1
2278825	C	G	Prupe.3G030700	MODIFIER	downstream_gene_variant	.	protein_coding	-1
2278825	C	G	Prupe.3G030600	MODIFIER	intron_variant	.	protein_coding	2
2278825	C	G	Prupe.3G030600	MODIFIER	intron_variant	.	protein_coding	1
2278825	C	G	Prupe.3G030600	MODIFIER	intron_variant	.	protein_coding	3
2291933	T	G	Prupe.3G030900	MODERATE	missense_variant	p.Gln255Pro	protein_coding	4
2291933	T	G	Prupe.3G030900	MODERATE	missense_variant	p.Gln238Pro	protein_coding	4
2291933	T	G	Prupe.3G030900	MODERATE	missense_variant	p.Gln255Pro	protein_coding	3
2291933	T	G	Prupe.3G030900	MODERATE	missense_variant	p.Gln21Pro	protein_coding	4
2291933	T	G	Prupe.3G030800	MODIFIER	downstream_gene_variant	.	protein_coding	-1
2291944	C	T	Prupe.3G030900	MODERATE	missense_variant	p.Met251Ile	protein_coding	4
2291944	C	T	Prupe.3G030900	MODERATE	missense_variant	p.Met234Ile	protein_coding	4
2291944	C	T	Prupe.3G030900	MODERATE	missense_variant	p.Met251Ile	protein_coding	3
2291944	C	T	Prupe.3G030900	MODERATE	missense_variant	p.Met17Ile	protein_coding	4
2291944	C	T	Prupe.3G030800	MODIFIER	downstream_gene_variant	.	protein_coding	-1
2291945	A	G	Prupe.3G030900	MODERATE	missense_variant	p.Met251Thr	protein_coding	4
2291945	A	G	Prupe.3G030900	MODERATE	missense_variant	p.Met234Thr	protein_coding	4
2291945	A	G	Prupe.3G030900	MODERATE	missense_variant	p.Met251Thr	protein_coding	3
2291945	A	G	Prupe.3G030900	MODERATE	missense_variant	p.Met17Thr	protein_coding	4
2291945	A	G	Prupe.3G030800	MODIFIER	downstream_gene_variant	.	protein_coding	-1
2315558	C	G	Prupe.3G031100	MODERATE	missense_variant	p.Asp301Glu	protein_coding	10
2315558	C	G	Prupe.3G031000	MODIFIER	downstream_gene_variant	.	protein_coding	-1
2315558	C	G	Prupe.3G031200	MODIFIER	downstream_gene_variant	.	protein_coding	-1
2315703	G	A	Prupe.3G031000	MODIFIER	downstream_gene_variant	.	protein_coding	-1
2315703	G	A	Prupe.3G031200	MODIFIER	downstream_gene_variant	.	protein_coding	-1
2315703	G	A	Prupe.3G031100	MODIFIER	intron_variant	.	protein_coding	10
2381514	C	A	Prupe.3G031800	LOW	synonymous_variant	p.Gly731Gly	protein_coding	14
2381514	C	A	Prupe.3G031800	LOW	synonymous_variant	p.Gly731Gly	protein_coding	15
2381514	C	A	Prupe.3G031900	MODIFIER	upstream_gene_variant	.	protein_coding	-1
2381514	C	A	Prupe.3G032000	MODIFIER	downstream_gene_variant	.	protein_coding	-1
2406724	C	T	Prupe.3G032300	LOW	synonymous_variant	p.Asn200Asn	protein_coding	2
2406724	C	T	Prupe.3G032400	MODIFIER	upstream_gene_variant	.	protein_coding	-1
2406724	C	T	Prupe.3G032500	MODIFIER	upstream_gene_variant	.	protein_coding	-1
2495198	G	A	Prupe.3G034100	LOW	synonymous_variant	p.Ser38Ser	protein_coding	1
2495198	G	A	Prupe.3G034200	MODIFIER	downstream_gene_variant	.	protein_coding	-1
2495295	C	T	Prupe.3G034100	MODERATE	missense_variant	p.Pro71Ser	protein_coding	1
2495295	C	T	Prupe.3G034200	MODIFIER	downstream_gene_variant	.	protein_coding	-1
2495300	T	G	Prupe.3G034100	LOW	synonymous_variant	p.Ser72Ser	protein_coding	1
2495300	T	G	Prupe.3G034200	MODIFIER	downstream_gene_variant	.	protein_coding	-1
2600008	T	C	Prupe.3G035900	LOW	splice_region_variant&intron_variant	.	protein_coding	6
2600008	T	C	Prupe.3G035800	MODIFIER	upstream_gene_variant	.	protein_coding	-1
2600008	T	C	Prupe.3G036000	MODIFIER	upstream_gene_variant	.	protein_coding	-1
2600008	T	C	Prupe.3G035900	MODIFIER	intron_variant	.	protein_coding	2
2600008	T	C	Prupe.3G035900	MODIFIER	intron_variant	.	protein_coding	3
2600077	C	T	Prupe.3G035900	LOW	synonymous_variant	p.Leu135Leu	protein_coding	7
2600077	C	T	Prupe.3G035800	MODIFIER	upstream_gene_variant	.	protein_coding	-1
2600077	C	T	Prupe.3G036000	MODIFIER	upstream_gene_variant	.	protein_coding	-1
2600077	C	T	Prupe.3G035900	MODIFIER	intron_variant	.	protein_coding	2
2600077	C	T	Prupe.3G035900	MODIFIER	intron_variant	.	protein_coding	3
2602926	G	A	Prupe.3G036000	LOW	synonymous_variant	p.Gly266Gly	protein_coding	1
2602926	G	A	Prupe.3G036100	MODIFIER	upstream_gene_variant	.	protein_coding	-1
2602926	G	A	Prupe.3G035900	MODIFIER	downstream_gene_variant	.	protein_coding	-1
2602953	A	G	Prupe.3G036000	LOW	synonymous_variant	p.Gly275Gly	protein_coding	1
2602953	A	G	Prupe.3G036100	MODIFIER	upstream_gene_variant	.	protein_coding	-1
2602953	A	G	Prupe.3G035900	MODIFIER	downstream_gene_variant	.	protein_coding	-1
2613517	C	A	Prupe.3G036100	MODERATE	missense_variant	p.Arg659Ser	protein_coding	8
2613517	C	A	Prupe.3G036100	MODERATE	missense_variant	p.Arg659Ser	protein_coding	7
2613517	C	A	Prupe.3G036100	MODERATE	missense_variant	p.Arg433Ser	protein_coding	2
2613570	A	T	Prupe.3G036100	LOW	synonymous_variant	p.Val676Val	protein_coding	8
2613570	A	T	Prupe.3G036100	LOW	synonymous_variant	p.Val676Val	protein_coding	7
2613570	A	T	Prupe.3G036100	LOW	synonymous_variant	p.Val450Val	protein_coding	2
2613578	G	T	Prupe.3G036100	MODERATE	missense_variant	p.Ser679Ile	protein_coding	8
2613578	G	T	Prupe.3G036100	MODERATE	missense_variant	p.Ser679Ile	protein_coding	7
2613578	G	T	Prupe.3G036100	MODERATE	missense_variant	p.Ser453Ile	protein_coding	2
2613770	G	C	Prupe.3G036100	MODERATE	missense_variant	p.Gly743Ala	protein_coding	8
2613770	G	C	Prupe.3G036100	MODERATE	missense_variant	p.Gly743Ala	protein_coding	7
2613770	G	C	Prupe.3G036100	MODERATE	missense_variant	p.Gly517Ala	protein_coding	2
2613804	T	C	Prupe.3G036100	LOW	synonymous_variant	p.Pro754Pro	protein_coding	8
2613804	T	C	Prupe.3G036100	LOW	synonymous_variant	p.Pro754Pro	protein_coding	7
2613804	T	C	Prupe.3G036100	LOW	synonymous_variant	p.Pro528Pro	protein_coding	2
2637536	G	T	Prupe.3G036500	MODIFIER	upstream_gene_variant	.	protein_coding	-1
2637536	G	T	Prupe.3G036400	MODIFIER	intron_variant	.	protein_coding	7
2637571	T	G	Prupe.3G036500	MODIFIER	upstream_gene_variant	.	protein_coding	-1
2637571	T	G	Prupe.3G036400	MODIFIER	intron_variant	.	protein_coding	7
2637593	T	A	Prupe.3G036500	MODIFIER	upstream_gene_variant	.	protein_coding	-1
2637593	T	A	Prupe.3G036400	MODIFIER	intron_variant	.	protein_coding	7
2647118	G	A	Prupe.3G036700	LOW	synonymous_variant	p.Asn519Asn	protein_coding	4
2647118	G	A	Prupe.3G036700	LOW	synonymous_variant	p.Asn518Asn	protein_coding	4
2647118	G	A	Prupe.3G036700	MODIFIER	3_prime_UTR_variant	.	protein_coding	5
2647118	G	A	Prupe.3G036600	MODIFIER	upstream_gene_variant	.	protein_coding	-1
2647118	G	A	Prupe.3G036800	MODIFIER	upstream_gene_variant	.	protein_coding	-1
2647118	G	A	Prupe.3G036500	MODIFIER	downstream_gene_variant	.	protein_coding	-1
2647140	A	C	Prupe.3G036700	MODERATE	missense_variant	p.Met512Arg	protein_coding	4
2647140	A	C	Prupe.3G036700	MODERATE	missense_variant	p.Met511Arg	protein_coding	4
2647140	A	C	Prupe.3G036700	MODIFIER	3_prime_UTR_variant	.	protein_coding	5
2647140	A	C	Prupe.3G036600	MODIFIER	upstream_gene_variant	.	protein_coding	-1
2647140	A	C	Prupe.3G036800	MODIFIER	upstream_gene_variant	.	protein_coding	-1
2647140	A	C	Prupe.3G036500	MODIFIER	downstream_gene_variant	.	protein_coding	-1
2647146	G	C	Prupe.3G036700	MODERATE	missense_variant	p.Ala510Gly	protein_coding	4
2647146	G	C	Prupe.3G036700	MODERATE	missense_variant	p.Ala509Gly	protein_coding	4
2647146	G	C	Prupe.3G036700	MODIFIER	3_prime_UTR_variant	.	protein_coding	5
2647146	G	C	Prupe.3G036600	MODIFIER	upstream_gene_variant	.	protein_coding	-1
2647146	G	C	Prupe.3G036800	MODIFIER	upstream_gene_variant	.	protein_coding	-1
2647146	G	C	Prupe.3G036500	MODIFIER	downstream_gene_variant	.	protein_coding	-1
2647167	G	T	Prupe.3G036700	MODERATE	missense_variant	p.Ala503Glu	protein_coding	4
2647167	G	T	Prupe.3G036700	MODERATE	missense_variant	p.Ala502Glu	protein_coding	4
2647167	G	T	Prupe.3G036700	MODIFIER	3_prime_UTR_variant	.	protein_coding	5
2647167	G	T	Prupe.3G036600	MODIFIER	upstream_gene_variant	.	protein_coding	-1
2647167	G	T	Prupe.3G036800	MODIFIER	upstream_gene_variant	.	protein_coding	-1
2647167	G	T	Prupe.3G036500	MODIFIER	downstream_gene_variant	.	protein_coding	-1
2647185	T	A	Prupe.3G036700	MODERATE	missense_variant	p.His497Leu	protein_coding	4
2647185	T	A	Prupe.3G036700	MODERATE	missense_variant	p.His496Leu	protein_coding	4
2647185	T	A	Prupe.3G036700	MODIFIER	3_prime_UTR_variant	.	protein_coding	5
2647185	T	A	Prupe.3G036600	MODIFIER	upstream_gene_variant	.	protein_coding	-1
2647185	T	A	Prupe.3G036800	MODIFIER	upstream_gene_variant	.	protein_coding	-1
2647185	T	A	Prupe.3G036500	MODIFIER	downstream_gene_variant	.	protein_coding	-1
2656536	C	G	Prupe.3G036800	MODIFIER	downstream_gene_variant	.	protein_coding	-1
2656536	C	G	Prupe.3G036900	MODIFIER	intron_variant	.	protein_coding	10
2656536	C	G	Prupe.3G036900	MODIFIER	intron_variant	.	protein_coding	9
2656555	G	T	Prupe.3G036800	MODIFIER	downstream_gene_variant	.	protein_coding	-1
2656555	G	T	Prupe.3G036900	MODIFIER	intron_variant	.	protein_coding	10
2656555	G	T	Prupe.3G036900	MODIFIER	intron_variant	.	protein_coding	9
2656646	A	G	Prupe.3G036900	LOW	synonymous_variant	p.Asn444Asn	protein_coding	10
2656646	A	G	Prupe.3G036900	LOW	synonymous_variant	p.Asn328Asn	protein_coding	9
2656646	A	G	Prupe.3G036800	MODIFIER	downstream_gene_variant	.	protein_coding	-1
2696726	C	T	Prupe.3G037300	LOW	synonymous_variant	p.Glu952Glu	protein_coding	12
2696731	T	G	Prupe.3G037300	MODERATE	missense_variant	p.Met951Leu	protein_coding	12
2696804	T	A	Prupe.3G037300	LOW	synonymous_variant	p.Pro926Pro	protein_coding	12
2707711	G	A	Prupe.3G037400	LOW	synonymous_variant	p.Cys941Cys	protein_coding	20
2707711	G	A	Prupe.3G037400	LOW	synonymous_variant	p.Cys514Cys	protein_coding	17
2707711	G	A	Prupe.3G037300	MODIFIER	upstream_gene_variant	.	protein_coding	-1
2707994	G	A	Prupe.3G037300	MODIFIER	upstream_gene_variant	.	protein_coding	-1
2707994	G	A	Prupe.3G037400	MODIFIER	intron_variant	.	protein_coding	19
2707994	G	A	Prupe.3G037400	MODIFIER	intron_variant	.	protein_coding	16
2708090	T	A	Prupe.3G037400	LOW	synonymous_variant	p.Pro895Pro	protein_coding	19
2708090	T	A	Prupe.3G037400	LOW	synonymous_variant	p.Pro468Pro	protein_coding	16
2708090	T	A	Prupe.3G037300	MODIFIER	upstream_gene_variant	.	protein_coding	-1
2708941	T	A	Prupe.3G037300	MODIFIER	upstream_gene_variant	.	protein_coding	-1
2708941	T	A	Prupe.3G037400	MODIFIER	intron_variant	.	protein_coding	16
2708941	T	A	Prupe.3G037400	MODIFIER	intron_variant	.	protein_coding	13
2708969	T	C	Prupe.3G037300	MODIFIER	upstream_gene_variant	.	protein_coding	-1
2708969	T	C	Prupe.3G037400	MODIFIER	intron_variant	.	protein_coding	16
2708969	T	C	Prupe.3G037400	MODIFIER	intron_variant	.	protein_coding	13
2741626	T	A	Prupe.3G037900	MODERATE	missense_variant	p.Leu589Gln	protein_coding	2
2741626	T	A	Prupe.3G038000	MODIFIER	upstream_gene_variant	.	protein_coding	-1
2741875	G	A	Prupe.3G037900	MODERATE	missense_variant	p.Arg672His	protein_coding	2
2741875	G	A	Prupe.3G038000	MODIFIER	upstream_gene_variant	.	protein_coding	-1
2895223	C	T	Prupe.3G040300	MODERATE	missense_variant	p.Ala44Val	protein_coding	1
2895223	C	T	Prupe.3G040200	MODIFIER	downstream_gene_variant	.	protein_coding	-1
2895223	C	T	Prupe.3G040400	MODIFIER	downstream_gene_variant	.	protein_coding	-1
2895285	A	G	Prupe.3G040300	MODERATE	missense_variant	p.Asn65Asp	protein_coding	1
2895285	A	G	Prupe.3G040200	MODIFIER	downstream_gene_variant	.	protein_coding	-1
2895285	A	G	Prupe.3G040400	MODIFIER	downstream_gene_variant	.	protein_coding	-1
2963540	G	C	Prupe.3G041500	MODERATE	missense_variant	p.Gln1332Glu	protein_coding	1
2963540	G	C	Prupe.3G041400	MODIFIER	upstream_gene_variant	.	protein_coding	-1
2963540	G	C	Prupe.3G041600	MODIFIER	downstream_gene_variant	.	protein_coding	-1
2963748	T	C	Prupe.3G041500	LOW	synonymous_variant	p.Thr1262Thr	protein_coding	1
2963748	T	C	Prupe.3G041400	MODIFIER	upstream_gene_variant	.	protein_coding	-1
2963748	T	C	Prupe.3G041600	MODIFIER	downstream_gene_variant	.	protein_coding	-1
3021543	G	A	Prupe.3G042500	MODIFIER	downstream_gene_variant	.	protein_coding	-1
3021543	G	A	Prupe.3G042400	MODIFIER	intron_variant	.	protein_coding	1
3043929	C	T	Prupe.3G042700	MODERATE	missense_variant	p.Gly254Ser	protein_coding	8
3043929	C	T	Prupe.3G042700	MODERATE	missense_variant	p.Gly228Ser	protein_coding	7
3043929	C	T	Prupe.3G042700	MODIFIER	3_prime_UTR_variant	.	protein_coding	3
3043929	C	T	Prupe.3G042800	MODIFIER	upstream_gene_variant	.	protein_coding	-1
3043929	C	T	Prupe.3G042600	MODIFIER	downstream_gene_variant	.	protein_coding	-1
3044083	T	G	Prupe.3G042800	MODIFIER	upstream_gene_variant	.	protein_coding	-1
3044083	T	G	Prupe.3G042600	MODIFIER	downstream_gene_variant	.	protein_coding	-1
3044083	T	G	Prupe.3G042700	MODIFIER	intron_variant	.	protein_coding	7
3044083	T	G	Prupe.3G042700	MODIFIER	intron_variant	.	protein_coding	6
3044083	T	G	Prupe.3G042700	MODIFIER	intron_variant	.	protein_coding	2
3044111	T	C	Prupe.3G042800	MODIFIER	upstream_gene_variant	.	protein_coding	-1
3044111	T	C	Prupe.3G042600	MODIFIER	downstream_gene_variant	.	protein_coding	-1
3044111	T	C	Prupe.3G042700	MODIFIER	intron_variant	.	protein_coding	7
3044111	T	C	Prupe.3G042700	MODIFIER	intron_variant	.	protein_coding	6
3044111	T	C	Prupe.3G042700	MODIFIER	intron_variant	.	protein_coding	2
3059042	C	A	Prupe.3G042900	MODIFIER	3_prime_UTR_variant	.	protein_coding	9
3059042	C	A	Prupe.3G042900	MODIFIER	3_prime_UTR_variant	.	protein_coding	8
3059042	C	A	Prupe.3G042900	MODIFIER	3_prime_UTR_variant	.	protein_coding	5
3059042	C	A	Prupe.3G043000	MODIFIER	upstream_gene_variant	.	protein_coding	-1
3059042	C	A	Prupe.3G043100	MODIFIER	downstream_gene_variant	.	protein_coding	-1
3059084	A	G	Prupe.3G042900	MODIFIER	3_prime_UTR_variant	.	protein_coding	9
3059084	A	G	Prupe.3G042900	MODIFIER	3_prime_UTR_variant	.	protein_coding	8
3059084	A	G	Prupe.3G042900	MODIFIER	3_prime_UTR_variant	.	protein_coding	5
3059084	A	G	Prupe.3G043000	MODIFIER	upstream_gene_variant	.	protein_coding	-1
3059084	A	G	Prupe.3G043100	MODIFIER	downstream_gene_variant	.	protein_coding	-1
3090390	T	A	Prupe.3G043500	LOW	synonymous_variant	p.Pro776Pro	protein_coding	10
3090390	T	A	Prupe.3G043500	LOW	synonymous_variant	p.Pro772Pro	protein_coding	10
3090390	T	A	Prupe.3G043500	LOW	synonymous_variant	p.Pro774Pro	protein_coding	10
3090390	T	A	Prupe.3G043500	LOW	synonymous_variant	p.Pro773Pro	protein_coding	10
3090390	T	A	Prupe.3G043500	LOW	synonymous_variant	p.Pro771Pro	protein_coding	10
3090390	T	A	Prupe.3G043500	LOW	synonymous_variant	p.Pro775Pro	protein_coding	10
3135513	G	A	Prupe.3G044000	MODIFIER	downstream_gene_variant	.	protein_coding	-1
3135513	G	A	Prupe.3G044200	MODIFIER	downstream_gene_variant	.	protein_coding	-1
3135513	G	A	Prupe.3G044100	MODIFIER	intron_variant	.	protein_coding	1
3135935	G	T	Prupe.3G044000	MODIFIER	downstream_gene_variant	.	protein_coding	-1
3135935	G	T	Prupe.3G044200	MODIFIER	downstream_gene_variant	.	protein_coding	-1
3135935	G	T	Prupe.3G044100	MODIFIER	intron_variant	.	protein_coding	1
3150342	C	G	Prupe.3G044200	MODERATE	missense_variant	p.Ser3425Thr	protein_coding	44
3150342	C	G	Prupe.3G044200	MODERATE	missense_variant	p.Ser3411Thr	protein_coding	44
3150342	C	G	Prupe.3G044200	MODERATE	missense_variant	p.Ser3426Thr	protein_coding	44
3150342	C	G	Prupe.3G044200	MODERATE	missense_variant	p.Ser3429Thr	protein_coding	44
3150342	C	G	Prupe.3G044200	MODERATE	missense_variant	p.Ser3430Thr	protein_coding	44
3151863	G	T	Prupe.3G044200	MODIFIER	intron_variant	.	protein_coding	41
3151905	A	T	Prupe.3G044200	MODIFIER	intron_variant	.	protein_coding	41
3151906	T	C	Prupe.3G044200	MODIFIER	intron_variant	.	protein_coding	41
3151941	A	G	Prupe.3G044200	MODIFIER	intron_variant	.	protein_coding	41
3152120	A	G	Prupe.3G044200	MODIFIER	intron_variant	.	protein_coding	41
3190515	C	T	Prupe.3G044400	LOW	splice_region_variant&intron_variant	.	protein_coding	7
3190515	C	T	Prupe.3G044500	MODIFIER	upstream_gene_variant	.	protein_coding	-1
3203837	A	G	Prupe.3G044600	LOW	synonymous_variant	p.Val316Val	protein_coding	1
3203837	A	G	Prupe.3G044500	MODIFIER	downstream_gene_variant	.	protein_coding	-1
3203837	A	G	Prupe.3G044700	MODIFIER	downstream_gene_variant	.	protein_coding	-1
3203966	A	G	Prupe.3G044600	LOW	synonymous_variant	p.His273His	protein_coding	1
3203966	A	G	Prupe.3G044500	MODIFIER	downstream_gene_variant	.	protein_coding	-1
3203966	A	G	Prupe.3G044700	MODIFIER	downstream_gene_variant	.	protein_coding	-1
3237232	C	G	Prupe.3G045000	LOW	synonymous_variant	p.Ser98Ser	protein_coding	3
3237232	C	G	Prupe.3G044900	MODIFIER	upstream_gene_variant	.	protein_coding	-1
3237232	C	G	Prupe.3G045100	MODIFIER	upstream_gene_variant	.	protein_coding	-1
3237316	G	T	Prupe.3G044900	MODIFIER	upstream_gene_variant	.	protein_coding	-1
3237316	G	T	Prupe.3G045100	MODIFIER	upstream_gene_variant	.	protein_coding	-1
3237316	G	T	Prupe.3G045000	MODIFIER	intron_variant	.	protein_coding	3
3237346	C	G	Prupe.3G044900	MODIFIER	upstream_gene_variant	.	protein_coding	-1
3237346	C	G	Prupe.3G045100	MODIFIER	upstream_gene_variant	.	protein_coding	-1
3237346	C	G	Prupe.3G045000	MODIFIER	intron_variant	.	protein_coding	3
3237353	T	C	Prupe.3G044900	MODIFIER	upstream_gene_variant	.	protein_coding	-1
3237353	T	C	Prupe.3G045100	MODIFIER	upstream_gene_variant	.	protein_coding	-1
3237353	T	C	Prupe.3G045000	MODIFIER	intron_variant	.	protein_coding	3
3237357	C	A	Prupe.3G044900	MODIFIER	upstream_gene_variant	.	protein_coding	-1
3237357	C	A	Prupe.3G045100	MODIFIER	upstream_gene_variant	.	protein_coding	-1
3237357	C	A	Prupe.3G045000	MODIFIER	intron_variant	.	protein_coding	3
3262009	G	A	Prupe.3G045400	MODIFIER	downstream_gene_variant	.	protein_coding	-1
3262009	G	A	Prupe.3G045300	MODIFIER	intron_variant	.	protein_coding	4
3262009	G	A	Prupe.3G045300	MODIFIER	intron_variant	.	protein_coding	1
3262147	A	G	Prupe.3G045300	LOW	splice_region_variant&synonymous_variant	p.Val204Val	protein_coding	5
3262147	A	G	Prupe.3G045400	MODIFIER	downstream_gene_variant	.	protein_coding	-1
3262147	A	G	Prupe.3G045300	MODIFIER	intron_variant	.	protein_coding	1
3262154	G	C	Prupe.3G045300	MODERATE	missense_variant	p.Gly207Arg	protein_coding	5
3262154	G	C	Prupe.3G045400	MODIFIER	downstream_gene_variant	.	protein_coding	-1
3262154	G	C	Prupe.3G045300	MODIFIER	intron_variant	.	protein_coding	1
3262196	C	T	Prupe.3G045300	MODERATE	missense_variant	p.Pro221Ser	protein_coding	5
3262196	C	T	Prupe.3G045400	MODIFIER	downstream_gene_variant	.	protein_coding	-1
3262196	C	T	Prupe.3G045300	MODIFIER	intron_variant	.	protein_coding	1
3298100	T	G	Prupe.3G046100	LOW	synonymous_variant	p.Arg154Arg	protein_coding	2
3299575	G	C	Prupe.3G046100	LOW	5_prime_UTR_premature_start_codon_gain_variant	.	protein_coding	1
3299575	G	C	Prupe.3G046100	MODIFIER	5_prime_UTR_variant	.	protein_coding	1
3299575	G	C	Prupe.3G046100	MODIFIER	upstream_gene_variant	.	protein_coding	-1
3299575	G	C	Prupe.3G046200	MODIFIER	downstream_gene_variant	.	protein_coding	-1
3321595	T	C	Prupe.3G046500	MODIFIER	downstream_gene_variant	.	protein_coding	-1
3321595	T	C	Prupe.3G046700	MODIFIER	downstream_gene_variant	.	protein_coding	-1
3321595	T	C	Prupe.3G046600	MODIFIER	intron_variant	.	protein_coding	6
3321767	G	C	Prupe.3G046500	MODIFIER	downstream_gene_variant	.	protein_coding	-1
3321767	G	C	Prupe.3G046700	MODIFIER	downstream_gene_variant	.	protein_coding	-1
3321767	G	C	Prupe.3G046600	MODIFIER	intron_variant	.	protein_coding	7
3321843	G	C	Prupe.3G046500	MODIFIER	downstream_gene_variant	.	protein_coding	-1
3321843	G	C	Prupe.3G046700	MODIFIER	downstream_gene_variant	.	protein_coding	-1
3321843	G	C	Prupe.3G046600	MODIFIER	intron_variant	.	protein_coding	7
3374430	A	T	Prupe.3G047500	MODIFIER	intron_variant	.	protein_coding	2
3385044	G	A	Prupe.3G047900	MODIFIER	upstream_gene_variant	.	protein_coding	-1
3385044	G	A	Prupe.3G047600	MODIFIER	downstream_gene_variant	.	protein_coding	-1
3385044	G	A	Prupe.3G047800	MODIFIER	downstream_gene_variant	.	protein_coding	-1
3385044	G	A	Prupe.3G047700	MODIFIER	intron_variant	.	protein_coding	1
3385108	T	C	Prupe.3G047900	MODIFIER	upstream_gene_variant	.	protein_coding	-1
3385108	T	C	Prupe.3G047600	MODIFIER	downstream_gene_variant	.	protein_coding	-1
3385108	T	C	Prupe.3G047800	MODIFIER	downstream_gene_variant	.	protein_coding	-1
3385108	T	C	Prupe.3G047700	MODIFIER	intron_variant	.	protein_coding	1
3387324	C	T	Prupe.3G047800	LOW	synonymous_variant	p.Ser67Ser	protein_coding	2
3387324	C	T	Prupe.3G047900	MODIFIER	upstream_gene_variant	.	protein_coding	-1
3387324	C	T	Prupe.3G048000	MODIFIER	upstream_gene_variant	.	protein_coding	-1
3387324	C	T	Prupe.3G047600	MODIFIER	downstream_gene_variant	.	protein_coding	-1
3387324	C	T	Prupe.3G047700	MODIFIER	downstream_gene_variant	.	protein_coding	-1
3393406	C	T	Prupe.3G048000	LOW	synonymous_variant	p.Asn275Asn	protein_coding	6
3393406	C	T	Prupe.3G048100	MODIFIER	upstream_gene_variant	.	protein_coding	-1
3393406	C	T	Prupe.3G047900	MODIFIER	downstream_gene_variant	.	protein_coding	-1
3393637	G	A	Prupe.3G048000	LOW	synonymous_variant	p.Gly352Gly	protein_coding	6
3393637	G	A	Prupe.3G048100	MODIFIER	upstream_gene_variant	.	protein_coding	-1
3393637	G	A	Prupe.3G047900	MODIFIER	downstream_gene_variant	.	protein_coding	-1
3420086	A	G	Prupe.3G048500	MODERATE	missense_variant	p.Gln61Arg	protein_coding	2
3420086	A	G	Prupe.3G048500	MODERATE	missense_variant	p.Gln61Arg	protein_coding	3
3420086	A	G	Prupe.3G048400	MODIFIER	upstream_gene_variant	.	protein_coding	-1
3420166	C	A	Prupe.3G048500	MODERATE	missense_variant	p.His88Asn	protein_coding	2
3420166	C	A	Prupe.3G048500	MODERATE	missense_variant	p.His88Asn	protein_coding	3
3420166	C	A	Prupe.3G048400	MODIFIER	upstream_gene_variant	.	protein_coding	-1
3420192	G	T	Prupe.3G048500	LOW	splice_region_variant&intron_variant	.	protein_coding	2
3420192	G	T	Prupe.3G048500	LOW	splice_region_variant&intron_variant	.	protein_coding	3
3420192	G	T	Prupe.3G048400	MODIFIER	upstream_gene_variant	.	protein_coding	-1
3420519	T	C	Prupe.3G048400	MODIFIER	upstream_gene_variant	.	protein_coding	-1
3420519	T	C	Prupe.3G048500	MODIFIER	intron_variant	.	protein_coding	3
3420519	T	C	Prupe.3G048500	MODIFIER	intron_variant	.	protein_coding	4
3462651	G	C	Prupe.3G049100	MODERATE	missense_variant	p.Glu59Gln	protein_coding	1
3462651	G	C	Prupe.3G048900	MODIFIER	upstream_gene_variant	.	protein_coding	-1
3462651	G	C	Prupe.3G048800	MODIFIER	downstream_gene_variant	.	protein_coding	-1
3462651	G	C	Prupe.3G049000	MODIFIER	downstream_gene_variant	.	protein_coding	-1
3462651	G	C	Prupe.3G049200	MODIFIER	downstream_gene_variant	.	protein_coding	-1
3462651	G	C	Prupe.3G049300	MODIFIER	downstream_gene_variant	.	protein_coding	-1
3514118	G	A	Prupe.3G049800	MODIFIER	intron_variant	.	protein_coding	17
3514120	T	A	Prupe.3G049800	MODIFIER	intron_variant	.	protein_coding	17
3514168	G	A	Prupe.3G049800	MODIFIER	intron_variant	.	protein_coding	17
3570631	C	A	Prupe.3G050700	MODIFIER	upstream_gene_variant	.	protein_coding	-1
3570631	C	A	Prupe.3G050500	MODIFIER	downstream_gene_variant	.	protein_coding	-1
3570631	C	A	Prupe.3G050600	MODIFIER	intron_variant	.	protein_coding	4
3570640	C	T	Prupe.3G050700	MODIFIER	upstream_gene_variant	.	protein_coding	-1
3570640	C	T	Prupe.3G050500	MODIFIER	downstream_gene_variant	.	protein_coding	-1
3570640	C	T	Prupe.3G050600	MODIFIER	intron_variant	.	protein_coding	4
3574979	G	A	Prupe.3G050600	MODIFIER	upstream_gene_variant	.	protein_coding	-1
3574979	G	A	Prupe.3G050700	MODIFIER	upstream_gene_variant	.	protein_coding	-1
3574979	G	A	Prupe.3G050600-Prupe.3G050700	MODIFIER	intergenic_region	.	.	-1
3574985	G	A	Prupe.3G050600	MODIFIER	upstream_gene_variant	.	protein_coding	-1
3574985	G	A	Prupe.3G050700	MODIFIER	upstream_gene_variant	.	protein_coding	-1
3574985	G	A	Prupe.3G050600-Prupe.3G050700	MODIFIER	intergenic_region	.	.	-1
3575068	G	A	Prupe.3G050600	MODIFIER	upstream_gene_variant	.	protein_coding	-1
3575068	G	A	Prupe.3G050700	MODIFIER	upstream_gene_variant	.	protein_coding	-1
3575068	G	A	Prupe.3G050600-Prupe.3G050700	MODIFIER	intergenic_region	.	.	-1
3575069	C	G	Prupe.3G050600	MODIFIER	upstream_gene_variant	.	protein_coding	-1
3575069	C	G	Prupe.3G050700	MODIFIER	upstream_gene_variant	.	protein_coding	-1
3575069	C	G	Prupe.3G050600-Prupe.3G050700	MODIFIER	intergenic_region	.	.	-1
3575087	C	A	Prupe.3G050600	MODIFIER	upstream_gene_variant	.	protein_coding	-1
3575087	C	A	Prupe.3G050700	MODIFIER	upstream_gene_variant	.	protein_coding	-1
3575087	C	A	Prupe.3G050600-Prupe.3G050700	MODIFIER	intergenic_region	.	.	-1
3575130	G	A	Prupe.3G050700	MODIFIER	5_prime_UTR_variant	.	protein_coding	1
3575130	G	A	Prupe.3G050600	MODIFIER	upstream_gene_variant	.	protein_coding	-1
3575130	G	A	Prupe.3G050700	MODIFIER	upstream_gene_variant	.	protein_coding	-1
3575138	A	G	Prupe.3G050700	MODIFIER	5_prime_UTR_variant	.	protein_coding	1
3575138	A	G	Prupe.3G050600	MODIFIER	upstream_gene_variant	.	protein_coding	-1
3575138	A	G	Prupe.3G050700	MODIFIER	upstream_gene_variant	.	protein_coding	-1
3575165	C	G	Prupe.3G050700	MODIFIER	5_prime_UTR_variant	.	protein_coding	1
3575165	C	G	Prupe.3G050600	MODIFIER	upstream_gene_variant	.	protein_coding	-1
3579048	C	T	Prupe.3G050700	LOW	synonymous_variant	p.Asp339Asp	protein_coding	8
3579048	C	T	Prupe.3G050600	MODIFIER	upstream_gene_variant	.	protein_coding	-1
3579048	C	T	Prupe.3G050800	MODIFIER	upstream_gene_variant	.	protein_coding	-1
3606550	G	A	Prupe.3G051200	LOW	synonymous_variant	p.Phe109Phe	protein_coding	2
3606550	G	A	Prupe.3G051100	MODIFIER	upstream_gene_variant	.	protein_coding	-1
3606755	C	T	Prupe.3G051200	MODERATE	missense_variant	p.Cys41Tyr	protein_coding	2
3606755	C	T	Prupe.3G051100	MODIFIER	upstream_gene_variant	.	protein_coding	-1
3606771	C	T	Prupe.3G051200	MODERATE	missense_variant	p.Ala36Thr	protein_coding	2
3606771	C	T	Prupe.3G051100	MODIFIER	upstream_gene_variant	.	protein_coding	-1
3624318	C	A	Prupe.3G051400	MODIFIER	downstream_gene_variant	.	protein_coding	-1
3624318	C	A	Prupe.3G051500	MODIFIER	intron_variant	.	protein_coding	5
3624318	C	A	Prupe.3G051500	MODIFIER	intron_variant	.	protein_coding	4
3655444	A	G	Prupe.3G051800	LOW	synonymous_variant	p.Leu1381Leu	protein_coding	13
3655444	A	G	Prupe.3G051800	LOW	synonymous_variant	p.Leu1381Leu	protein_coding	11
3698982	A	G	Prupe.3G052400	MODIFIER	downstream_gene_variant	.	protein_coding	-1
3698982	A	G	Prupe.3G052300	MODIFIER	intron_variant	.	protein_coding	1
3704072	G	A	Prupe.3G052300	MODIFIER	downstream_gene_variant	.	protein_coding	-1
3704072	G	A	Prupe.3G052400	MODIFIER	intron_variant	.	protein_coding	13
3704094	A	C	Prupe.3G052300	MODIFIER	downstream_gene_variant	.	protein_coding	-1
3704094	A	C	Prupe.3G052400	MODIFIER	intron_variant	.	protein_coding	13
3721530	C	T	Prupe.3G052500	MODIFIER	3_prime_UTR_variant	.	protein_coding	12
3721530	C	T	Prupe.3G052500	MODIFIER	3_prime_UTR_variant	.	protein_coding	11
3721530	C	T	Prupe.3G052500	MODIFIER	3_prime_UTR_variant	.	protein_coding	10
3721530	C	T	Prupe.3G052600	MODIFIER	upstream_gene_variant	.	protein_coding	-1
3755843	G	A	Prupe.3G053200	LOW	synonymous_variant	p.Val742Val	protein_coding	15
3755843	G	A	Prupe.3G053200	LOW	synonymous_variant	p.Val483Val	protein_coding	14
3755843	G	A	Prupe.3G053200	MODIFIER	3_prime_UTR_variant	.	protein_coding	15
3755843	G	A	Prupe.3G053100	MODIFIER	downstream_gene_variant	.	protein_coding	-1
3835939	T	C	Prupe.3G054500	MODIFIER	intron_variant	.	protein_coding	6
3835971	A	G	Prupe.3G054500	LOW	splice_region_variant&intron_variant	.	protein_coding	6
3836093	C	T	Prupe.3G054500	MODIFIER	intron_variant	.	protein_coding	5
3836102	A	C	Prupe.3G054500	MODIFIER	intron_variant	.	protein_coding	5
3836188	A	G	Prupe.3G054500	MODERATE	missense_variant	p.Ile426Thr	protein_coding	5
3992154	C	A	Prupe.3G056200	MODIFIER	upstream_gene_variant	.	protein_coding	-1
3992154	C	A	Prupe.3G056100	MODIFIER	downstream_gene_variant	.	protein_coding	-1
3992154	C	A	Prupe.3G056300	MODIFIER	downstream_gene_variant	.	protein_coding	-1
3992154	C	A	Prupe.3G056100-Prupe.3G056200	MODIFIER	intergenic_region	.	.	-1
3992161	C	T	Prupe.3G056200	MODIFIER	upstream_gene_variant	.	protein_coding	-1
3992161	C	T	Prupe.3G056100	MODIFIER	downstream_gene_variant	.	protein_coding	-1
3992161	C	T	Prupe.3G056300	MODIFIER	downstream_gene_variant	.	protein_coding	-1
3992161	C	T	Prupe.3G056100-Prupe.3G056200	MODIFIER	intergenic_region	.	.	-1
3992187	A	T	Prupe.3G056200	MODIFIER	upstream_gene_variant	.	protein_coding	-1
3992187	A	T	Prupe.3G056100	MODIFIER	downstream_gene_variant	.	protein_coding	-1
3992187	A	T	Prupe.3G056300	MODIFIER	downstream_gene_variant	.	protein_coding	-1
3992187	A	T	Prupe.3G056100-Prupe.3G056200	MODIFIER	intergenic_region	.	.	-1
3992219	A	T	Prupe.3G056200	MODIFIER	upstream_gene_variant	.	protein_coding	-1
3992219	A	T	Prupe.3G056100	MODIFIER	downstream_gene_variant	.	protein_coding	-1
3992219	A	T	Prupe.3G056300	MODIFIER	downstream_gene_variant	.	protein_coding	-1
3992219	A	T	Prupe.3G056100-Prupe.3G056200	MODIFIER	intergenic_region	.	.	-1
3998325	C	A	Prupe.3G056300	MODERATE	missense_variant	p.Arg71Leu	protein_coding	1
3998325	C	A	Prupe.3G056200	MODIFIER	downstream_gene_variant	.	protein_coding	-1
3998325	C	A	Prupe.3G056400	MODIFIER	downstream_gene_variant	.	protein_coding	-1
3998408	A	G	Prupe.3G056300	LOW	synonymous_variant	p.Gly43Gly	protein_coding	1
3998408	A	G	Prupe.3G056200	MODIFIER	downstream_gene_variant	.	protein_coding	-1
3998408	A	G	Prupe.3G056400	MODIFIER	downstream_gene_variant	.	protein_coding	-1
4087421	C	T	Prupe.3G057700	MODIFIER	intron_variant	.	protein_coding	6
4087421	C	T	Prupe.3G057700	MODIFIER	intron_variant	.	protein_coding	5
4087664	A	G	Prupe.3G057700	LOW	splice_region_variant&intron_variant	.	protein_coding	7
4087664	A	G	Prupe.3G057700	LOW	splice_region_variant&intron_variant	.	protein_coding	6
4130925	C	G	Prupe.3G058500	MODIFIER	3_prime_UTR_variant	.	protein_coding	2
4130925	C	G	Prupe.3G058300	MODIFIER	upstream_gene_variant	.	protein_coding	-1
4130925	C	G	Prupe.3G058400	MODIFIER	downstream_gene_variant	.	protein_coding	-1
4130930	A	T	Prupe.3G058500	MODIFIER	3_prime_UTR_variant	.	protein_coding	2
4130930	A	T	Prupe.3G058300	MODIFIER	upstream_gene_variant	.	protein_coding	-1
4130930	A	T	Prupe.3G058400	MODIFIER	downstream_gene_variant	.	protein_coding	-1
4130933	C	G	Prupe.3G058500	MODIFIER	3_prime_UTR_variant	.	protein_coding	2
4130933	C	G	Prupe.3G058300	MODIFIER	upstream_gene_variant	.	protein_coding	-1
4130933	C	G	Prupe.3G058400	MODIFIER	downstream_gene_variant	.	protein_coding	-1
4130947	C	T	Prupe.3G058500	LOW	synonymous_variant	p.Glu203Glu	protein_coding	2
4130947	C	T	Prupe.3G058500	LOW	synonymous_variant	p.Glu201Glu	protein_coding	2
4130947	C	T	Prupe.3G058300	MODIFIER	upstream_gene_variant	.	protein_coding	-1
4130947	C	T	Prupe.3G058400	MODIFIER	downstream_gene_variant	.	protein_coding	-1
4131001	A	G	Prupe.3G058500	LOW	synonymous_variant	p.Asp185Asp	protein_coding	2
4131001	A	G	Prupe.3G058500	LOW	synonymous_variant	p.Asp183Asp	protein_coding	2
4131001	A	G	Prupe.3G058300	MODIFIER	upstream_gene_variant	.	protein_coding	-1
4131001	A	G	Prupe.3G058400	MODIFIER	downstream_gene_variant	.	protein_coding	-1
4164511	A	G	Prupe.3G058800	MODIFIER	upstream_gene_variant	.	protein_coding	-1
4164511	A	G	Prupe.3G058900	MODIFIER	upstream_gene_variant	.	protein_coding	-1
4164511	A	G	Prupe.3G059000	MODIFIER	upstream_gene_variant	.	protein_coding	-1
4164511	A	G	Prupe.3G058700	MODIFIER	downstream_gene_variant	.	protein_coding	-1
4164511	A	G	Prupe.3G058800-Prupe.3G058900	MODIFIER	intergenic_region	.	.	-1
4164526	T	C	Prupe.3G058800	MODIFIER	upstream_gene_variant	.	protein_coding	-1
4164526	T	C	Prupe.3G058900	MODIFIER	upstream_gene_variant	.	protein_coding	-1
4164526	T	C	Prupe.3G059000	MODIFIER	upstream_gene_variant	.	protein_coding	-1
4164526	T	C	Prupe.3G058700	MODIFIER	downstream_gene_variant	.	protein_coding	-1
4164526	T	C	Prupe.3G058800-Prupe.3G058900	MODIFIER	intergenic_region	.	.	-1
4164554	T	C	Prupe.3G058800	MODIFIER	upstream_gene_variant	.	protein_coding	-1
4164554	T	C	Prupe.3G058900	MODIFIER	upstream_gene_variant	.	protein_coding	-1
4164554	T	C	Prupe.3G059000	MODIFIER	upstream_gene_variant	.	protein_coding	-1
4164554	T	C	Prupe.3G058700	MODIFIER	downstream_gene_variant	.	protein_coding	-1
4164554	T	C	Prupe.3G058800-Prupe.3G058900	MODIFIER	intergenic_region	.	.	-1
4164613	G	A	Prupe.3G058900	MODIFIER	5_prime_UTR_variant	.	protein_coding	1
4164613	G	A	Prupe.3G058800	MODIFIER	upstream_gene_variant	.	protein_coding	-1
4164613	G	A	Prupe.3G059000	MODIFIER	upstream_gene_variant	.	protein_coding	-1
4164613	G	A	Prupe.3G058700	MODIFIER	downstream_gene_variant	.	protein_coding	-1
4164848	A	T	Prupe.3G058900	MODERATE	missense_variant	p.Glu70Asp	protein_coding	1
4164848	A	T	Prupe.3G058800	MODIFIER	upstream_gene_variant	.	protein_coding	-1
4164848	A	T	Prupe.3G059000	MODIFIER	upstream_gene_variant	.	protein_coding	-1
4164848	A	T	Prupe.3G058700	MODIFIER	downstream_gene_variant	.	protein_coding	-1
4164921	G	C	Prupe.3G058800	MODIFIER	upstream_gene_variant	.	protein_coding	-1
4164921	G	C	Prupe.3G059000	MODIFIER	upstream_gene_variant	.	protein_coding	-1
4164921	G	C	Prupe.3G058700	MODIFIER	downstream_gene_variant	.	protein_coding	-1
4164921	G	C	Prupe.3G058900	MODIFIER	intron_variant	.	protein_coding	1
4164945	G	A	Prupe.3G058800	MODIFIER	upstream_gene_variant	.	protein_coding	-1
4164945	G	A	Prupe.3G059000	MODIFIER	upstream_gene_variant	.	protein_coding	-1
4164945	G	A	Prupe.3G058700	MODIFIER	downstream_gene_variant	.	protein_coding	-1
4164945	G	A	Prupe.3G058900	MODIFIER	intron_variant	.	protein_coding	1
4167947	C	T	Prupe.3G059000	MODIFIER	5_prime_UTR_variant	.	protein_coding	1
4167947	C	T	Prupe.3G058800	MODIFIER	upstream_gene_variant	.	protein_coding	-1
4167947	C	T	Prupe.3G059000	MODIFIER	upstream_gene_variant	.	protein_coding	-1
4167947	C	T	Prupe.3G058900	MODIFIER	downstream_gene_variant	.	protein_coding	-1
4168021	T	C	Prupe.3G059000	MODIFIER	5_prime_UTR_variant	.	protein_coding	1
4168021	T	C	Prupe.3G058800	MODIFIER	upstream_gene_variant	.	protein_coding	-1
4168021	T	C	Prupe.3G059000	MODIFIER	upstream_gene_variant	.	protein_coding	-1
4168021	T	C	Prupe.3G058900	MODIFIER	downstream_gene_variant	.	protein_coding	-1
4185216	T	G	Prupe.3G059100	LOW	synonymous_variant	p.Pro165Pro	protein_coding	1
4185216	T	G	Prupe.3G059200	MODIFIER	downstream_gene_variant	.	protein_coding	-1
4185277	A	G	Prupe.3G059100	MODERATE	missense_variant	p.Leu145Ser	protein_coding	1
4185277	A	G	Prupe.3G059200	MODIFIER	downstream_gene_variant	.	protein_coding	-1
4185444	A	G	Prupe.3G059100	LOW	synonymous_variant	p.Tyr89Tyr	protein_coding	1
4185444	A	G	Prupe.3G059200	MODIFIER	downstream_gene_variant	.	protein_coding	-1
4185456	A	T	Prupe.3G059100	LOW	synonymous_variant	p.Pro85Pro	protein_coding	1
4185456	A	T	Prupe.3G059200	MODIFIER	downstream_gene_variant	.	protein_coding	-1
4185522	C	G	Prupe.3G059100	LOW	synonymous_variant	p.Ser63Ser	protein_coding	1
4185522	C	G	Prupe.3G059200	MODIFIER	downstream_gene_variant	.	protein_coding	-1
4185525	A	G	Prupe.3G059100	LOW	synonymous_variant	p.Ser62Ser	protein_coding	1
4185525	A	G	Prupe.3G059200	MODIFIER	downstream_gene_variant	.	protein_coding	-1
4185568	C	G	Prupe.3G059100	MODERATE	missense_variant	p.Gly48Ala	protein_coding	1
4185568	C	G	Prupe.3G059200	MODIFIER	downstream_gene_variant	.	protein_coding	-1
4185966	G	T	Prupe.3G059100	MODIFIER	5_prime_UTR_variant	.	protein_coding	1
4185966	G	T	Prupe.3G059200	MODIFIER	downstream_gene_variant	.	protein_coding	-1
4186037	C	T	Prupe.3G059100	MODIFIER	5_prime_UTR_variant	.	protein_coding	1
4186037	C	T	Prupe.3G059200	MODIFIER	downstream_gene_variant	.	protein_coding	-1
4186051	G	C	Prupe.3G059100	MODIFIER	5_prime_UTR_variant	.	protein_coding	1
4186051	G	C	Prupe.3G059200	MODIFIER	downstream_gene_variant	.	protein_coding	-1
4186085	T	G	Prupe.3G059100	MODIFIER	5_prime_UTR_variant	.	protein_coding	1
4186085	T	G	Prupe.3G059200	MODIFIER	downstream_gene_variant	.	protein_coding	-1
4186161	A	G	Prupe.3G059100	MODIFIER	5_prime_UTR_variant	.	protein_coding	1
4186161	A	G	Prupe.3G059200	MODIFIER	downstream_gene_variant	.	protein_coding	-1
4186220	C	A	Prupe.3G059100	MODIFIER	5_prime_UTR_variant	.	protein_coding	1
4186220	C	A	Prupe.3G059200	MODIFIER	downstream_gene_variant	.	protein_coding	-1
4186255	C	T	Prupe.3G059100	MODIFIER	upstream_gene_variant	.	protein_coding	-1
4186255	C	T	Prupe.3G059200	MODIFIER	downstream_gene_variant	.	protein_coding	-1
4186255	C	T	Prupe.3G059100-Prupe.3G059200	MODIFIER	intergenic_region	.	.	-1
4214891	A	G	Prupe.3G059400	MODIFIER	5_prime_UTR_variant	.	protein_coding	1
4214891	A	G	Prupe.3G059400	MODIFIER	intron_variant	.	protein_coding	1
4214940	T	A	Prupe.3G059400	MODIFIER	5_prime_UTR_variant	.	protein_coding	1
4214940	T	A	Prupe.3G059400	MODIFIER	intron_variant	.	protein_coding	1
4221448	A	T	Prupe.3G059500	MODIFIER	3_prime_UTR_variant	.	protein_coding	2
4221448	A	T	Prupe.3G059600	MODIFIER	downstream_gene_variant	.	protein_coding	-1
4221666	G	A	Prupe.3G059500	LOW	synonymous_variant	p.Phe359Phe	protein_coding	2
4221666	G	A	Prupe.3G059600	MODIFIER	downstream_gene_variant	.	protein_coding	-1
4236193	C	T	Prupe.3G059800	MODERATE	missense_variant	p.Arg971Gln	protein_coding	16
4236193	C	T	Prupe.3G059800	MODERATE	missense_variant	p.Arg949Gln	protein_coding	14
4236193	C	T	Prupe.3G059800	MODERATE	missense_variant	p.Arg901Gln	protein_coding	14
4236193	C	T	Prupe.3G059800	MODERATE	missense_variant	p.Arg901Gln	protein_coding	16
4236319	A	T	Prupe.3G059800	MODIFIER	intron_variant	.	protein_coding	15
4236319	A	T	Prupe.3G059800	MODIFIER	intron_variant	.	protein_coding	13
4236324	T	A	Prupe.3G059800	MODIFIER	intron_variant	.	protein_coding	15
4236324	T	A	Prupe.3G059800	MODIFIER	intron_variant	.	protein_coding	13
4236355	G	T	Prupe.3G059800	LOW	splice_region_variant&intron_variant	.	protein_coding	15
4236355	G	T	Prupe.3G059800	LOW	splice_region_variant&intron_variant	.	protein_coding	13
4236403	G	T	Prupe.3G059800	MODERATE	missense_variant	p.Pro929Gln	protein_coding	15
4236403	G	T	Prupe.3G059800	MODERATE	missense_variant	p.Pro907Gln	protein_coding	13
4236403	G	T	Prupe.3G059800	MODERATE	missense_variant	p.Pro859Gln	protein_coding	13
4236403	G	T	Prupe.3G059800	MODERATE	missense_variant	p.Pro859Gln	protein_coding	15
4238572	T	C	Prupe.3G059800	LOW	splice_region_variant&intron_variant	.	protein_coding	8
4238572	T	C	Prupe.3G059800	LOW	splice_region_variant&intron_variant	.	protein_coding	6
4341864	G	A	Prupe.3G060300	MODIFIER	downstream_gene_variant	.	protein_coding	-1
4341864	G	A	Prupe.3G060400	MODIFIER	intron_variant	.	protein_coding	15
4341922	G	T	Prupe.3G060400	MODERATE	missense_variant	p.Pro689Thr	protein_coding	15
4341922	G	T	Prupe.3G060300	MODIFIER	downstream_gene_variant	.	protein_coding	-1
4341934	C	T	Prupe.3G060400	MODERATE	missense_variant	p.Ala685Thr	protein_coding	15
4341934	C	T	Prupe.3G060300	MODIFIER	downstream_gene_variant	.	protein_coding	-1
4341989	A	T	Prupe.3G060400	LOW	synonymous_variant	p.Leu666Leu	protein_coding	15
4341989	A	T	Prupe.3G060300	MODIFIER	downstream_gene_variant	.	protein_coding	-1
4357565	C	A	Prupe.3G060500	LOW	synonymous_variant	p.Ala145Ala	protein_coding	1
4357565	C	A	Prupe.3G060600	MODIFIER	upstream_gene_variant	.	protein_coding	-1
4357670	A	G	Prupe.3G060500	LOW	synonymous_variant	p.Phe110Phe	protein_coding	1
4357670	A	G	Prupe.3G060600	MODIFIER	upstream_gene_variant	.	protein_coding	-1
4366596	G	A	Prupe.3G060700	LOW	synonymous_variant	p.Leu548Leu	protein_coding	13
4366596	G	A	Prupe.3G060600	MODIFIER	downstream_gene_variant	.	protein_coding	-1
4366611	C	T	Prupe.3G060700	LOW	synonymous_variant	p.Pro543Pro	protein_coding	13
4366611	C	T	Prupe.3G060600	MODIFIER	downstream_gene_variant	.	protein_coding	-1
4366879	G	A	Prupe.3G060700	LOW	synonymous_variant	p.Gly495Gly	protein_coding	12
4366879	G	A	Prupe.3G060600	MODIFIER	downstream_gene_variant	.	protein_coding	-1
4389978	G	T	Prupe.3G061200	MODERATE	missense_variant	p.Glu97Asp	protein_coding	2
[truncated: 5,152 more rows]

## Sheet: Pp04
POS	REF	ALT	EFF[*].GENE	EFF[*].IMPACT	EFF[*].EFFECT	EFF[*].AA	EFF[*].BIOTYPE	a
[truncated: 341 more rows]

[truncated: 4 more sheets: Pp05, Pp06, Pp07, Pp08]
