# Supplementary material for: QTLs Identification for Iron Chlorosis in a Segregating Peach–Almond Progeny Through Double-Digest Sequence-Based Genotyping (SBG)
Source: Front Plant Sci. 2022 May 31;13:872208. doi: 10.3389/fpls.2022.872208 (PMC9194768; doi:10.3389/fpls.2022.872208)
Supplement: Supplementary file 4 [file Table_4.XLS]

## Sheet: Hoja 1
Supplementary Table S4. Annotations of genes in which high impact SNPs were identified.
Position of change	Reference	Alternative	'Adafuel'	'Flordaguard'	Gene	Pseudomolecule	Effect	Eff. AA	Ontology term				Ontology name				Ontology description
									GO	PFAM	PHANTER	KOG	GO	PFAM	PHANTER	KOG	GO	PFAM	PHANTER	KOG
1208674	G	A	AG	GG	Prupe.1G017700	1	splice_donor_variant&intron_variant	.	GO:0045735	PF00190	PTHR31189	-	Nutrient reservoir activity	Cupin_1	-	-	Functions in the storage of nutritious substrates.	Cupin	-	-
7994570	G	C	CG	GG	Prupe.1G100200	1	splice_acceptor_variant&intron_variant	.	-	PF01883	PTHR12377	KOG3381	-	DUF59	-	-	-	Domain of unknown function DUF59	-	-
14798421	G	C	CG	GG	Prupe.1G175500	1	stop_gained	p.Ser12*	-	PF00248	PTHR11732	KOG1575	-	Aldo_ket_red	-	-	-	Aldo/keto reductase family	ALDO/KETO REDUCTASE	Voltage-gated shaker-like K+ channel, subunit beta/KCNAB
29339396	A	G	AG	AA	Prupe.1G297300	1	stop_lost&splice_region_variant	p.Ter662Trpext*?	-	-	PTHR35705	KOG1003	-	-	-	Z	-	-	WPP DOMAIN-INTERACTING TAIL-ANCHORED PROTEIN 2	Actin filament-coating protein tropomyosin
35124228	C	T	CT	CC	Prupe.1G395700	1	stop_gained	p.Gln74*	GO:0004672; GO:0004713; GO:0005524; GO:0006468; GO:0030246	PF00139; PF07714	PTHR27007	KOG1187	protein kinase activity; protein tyrosine kinase activity; ATP binding; protein phosphorylation; carbohydrate binding; Lectin_legB; Pkinase_Tyr	Lectin_legB; Pkinase_Tyr	-	T	Catalysis of the phosphorylation of an amino acid residue in a protein; Catalysis of the reaction: ATP + a protein tyrosine = ADP + protein tyrosine phosphate. Interacting selectively and non-covalently with ATP, adenosine 5'-triphosphate, a universally important coenzyme and enzyme regulator. The process of introducing a phosphate group on to a protein. Interacting selectively and non-covalently…	Legume lectin domain; Protein tyrosine kinase	L-TYPE LECTIN-DOMAIN CONTAINING RECEPTOR KINASE IX.1-RELATED	Serine/threonine protein kinase
46271208	A	T	AT	AA	Prupe.1G566900	1	stop_gained	p.Tyr245*	-	PF00314	PTHR31048	-	-	Thaumatin	-	-	-	Thaumatin family	PATHOGENESIS-RELATED THAUMATIN SUPERFAMILY PROTEIN	-
46459670	T	A	AT	TT	Prupe.1G570100	1	stop_gained	p.Arg313*	-	PF13041	PTHR24015	-	-	PPR_2	-	-	-	PPR repeat family	-	-
20682834	G	T	GT	GG	Prupe.2G152000	2	stop_gained	p.Glu457*	GO:0004252; GO:0006508	PF00082; PF02225; PF05922	PTHR10795	-	serine-type endopeptidase activity; proteolysis	Peptidase_S8; PA	-	-	Catalysis of the hydrolysis of internal, alpha-peptide bonds in a polypeptide chain by a catalytic mechanism; The hydrolysis of proteins into smaller polypeptides and/or amino acids by cleavage of their peptide bonds.	Subtilase family; PA domain	PROPROTEIN CONVERTASE SUBTILISIN/KEXIN; SUBTILISIN-LIKE SERINE PROTEASE-RELATED	-
24793053	T	A	AT	TT	Prupe.2G218500	2	stop_gained	p.Lys27*	GO:0008270	PF04502	PTHR12111	-	zinc ion binding	DUF572	-	-	Interacting selectively and non-covalently with zinc (Zn) ions.	-	CELL CYCLE CONTROL PROTEIN CWF16-RELATED	-
25504866	T	C	CT	TT	Prupe.2G230500	2	splice_donor_variant&intron_variant	.	GO:0016020; GO:0016021; GO:0022857	PF00892	PTHR31218	-	integral component of membrane; transmembrane transporter activity	EamA	-	-	A lipid bilayer along with all the proteins and protein; The component of a membrane consisting of the gene products complexes embedded in it an attached to it; Enables the transfer of a substance from one side of a membrane to the other.	EamA-like transporter family	-	-
1329162	A	G	AG	AA	Prupe.3G018700	3	splice_donor_variant&intron_variant	.	GO:0005524; GO:0016887	PF00005; PF00037; PF04068	PTHR19248	-	ATP binding; ATPase activity;	ABC_tran; Fer4; RLI	-	-	Interacting selectively and non-covalently with ATP, adenosine 5'-triphosphate, a universally important coenzyme and enzyme regulator; Catalysis of the reaction: ATP + H2O = ADP + phosphate + 2 H+. May or may not be coupled to another reaction.	ABC transporter; 4Fe-4S binding domain; Possible Fer4-like domain in RNase L inhibitor, RLI	ATP-BINDING TRANSPORT PROTEIN-RELATED	-
6961632	G	A	AG	GG	Prupe.3G093100	3	stop_gained	p.Gln1079*	GO:0005515	PF00400	PTHR22847	KOG0266	protein binding	WD40	-	-	Interacting selectively and non-covalently with any protein or protein complex (a complex of two or more proteins that may include other nonprotein molecules).	WD domain, G-beta repeat	WD40 REPEAT PROTEIN	WD40 repeat-containing protein
19659102	C	A	AC	CC	Prupe.3G180700	3	stop_gained	p.Glu103*	GO:0004672; GO:0004713; GO:0005524; GO:0006468; GO:0030247	PF00069; PF13947	PTHR27005	KOG1187	protein kinase activity; protein tyrosine kinase activity; ATP binding; protein phosphorylation; polysaccharide binding	Pkinase; GUB_WAK_bind	-	T	Catalysis of the phosphorylation of an amino acid residue in a protein; Catalysis of the reaction: ATP + a protein tyrosine = ADP + protein tyrosine phosphate; Interacting selectively and non-covalently with ATP, adenosine 5'-triphosphate, a universally important coenzyme and enzyme regulator; The process of introducing a phosphate group on to a protein; Interacting selectively and non-covalently…	Protein kinase domain; Wall-associated receptor kinase galacturonan-binding	WALL-ASSOCIATED RECEPTOR KINASE-LIKE 1-RELATED	Serine/threonine protein kinase
20710092	A	C	AC	AA	Prupe.3G196300	3	splice_donor_variant&intron_variant	.	-	PF14111; PF14392	PTHR31286	-	-	DUF4283; zf-CCHC_4	-	-	-	Domain of unknown function (DUF4283); Zinc knuckle	NUCLEIC ACID BINDING / ZINC ION BINDING PROTEIN-RELATED	-
24172900	T	A	AT	TT	Prupe.3G251800	3	stop_gained	p.Leu320*	GO:0004672; GO:0005524; GO:0006468	PF07714; PF11721	PTHR27003	-	protein kinase activity; ATP binding; protein phosphorylation	Pkinase_Tyr; Malectin	-	-	Catalysis of the phosphorylation of an amino acid residue in a protein; Interacting selectively and non-covalently with ATP, adenosine 5'-triphosphate; The process of introducing a phosphate group on to a protein.	Protein tyrosine kinase; Di-glucose binding within endoplasmic reticulum	-	-
